# Supplementary material for: SUpervised exercise-therapy and Patient Education Rehabilitation (SUPER) versus minimal intervention for young adults at risk of knee osteoarthritis after ACL reconstruction: SUPER-Knee randomised controlled trial protocol
Source: PubMed Central journal article supplement — BMJ Open. 2023 Jan 18;13(1):e068279. doi: 10.1136/bmjopen-2022-068279 (PMC9853250; doi:10.1136/bmjopen-2022-068279), 2023-01-18
Supplement: bmjopen-2022-068279.draft_revisions.pdf [file bmjopen-2022-068279.draft_revisions.pdf]

# BMJ Open

BMJ Open is committed to open peer review. As part of this commitment we make the peer review history of every article we publish publicly available.

When an article is published we post the peer reviewers' comments and the authors' responses online. We also post the versions of the paper that were used during peer review. These are the versions that the peer review comments apply to.

The versions of the paper that follow are the versions that were submitted during the peer review process. They are not the versions of record or the final published versions. They should not be cited or distributed as the published version of this manuscript.

BMJ Open is an open access journal and the full, final, typeset and author-corrected version of record of the manuscript is available on our site with no access controls, subscription charges or pay-per-view fees (<http://bmjopen.bmj.com>).

If you have any questions on BMJ Open's open peer review process please email [info.bmjopen@bmj.com](mailto:info.bmjopen@bmj.com)

# BMJ Open

## **SUPervised exercise-therapy and Patient Education Rehabilitation (SUPER) versus minimal intervention for young adults at risk of knee osteoarthritis after ACL reconstruction: SUPER-Knee randomised controlled trial protocol**

|                               |                                                                                                                                                                                                                                                                                                                                                                                                                                                                                                                                                                                                                                                                                                                                                                                                                                                                                                                                                                                                                                                                                                                                                                                    |
|-------------------------------|------------------------------------------------------------------------------------------------------------------------------------------------------------------------------------------------------------------------------------------------------------------------------------------------------------------------------------------------------------------------------------------------------------------------------------------------------------------------------------------------------------------------------------------------------------------------------------------------------------------------------------------------------------------------------------------------------------------------------------------------------------------------------------------------------------------------------------------------------------------------------------------------------------------------------------------------------------------------------------------------------------------------------------------------------------------------------------------------------------------------------------------------------------------------------------|
| Journal:                      | <i>BMJ Open</i>                                                                                                                                                                                                                                                                                                                                                                                                                                                                                                                                                                                                                                                                                                                                                                                                                                                                                                                                                                                                                                                                                                                                                                    |
| Manuscript ID                 | bmjopen-2022-068279                                                                                                                                                                                                                                                                                                                                                                                                                                                                                                                                                                                                                                                                                                                                                                                                                                                                                                                                                                                                                                                                                                                                                                |
| Article Type:                 | Protocol                                                                                                                                                                                                                                                                                                                                                                                                                                                                                                                                                                                                                                                                                                                                                                                                                                                                                                                                                                                                                                                                                                                                                                           |
| Date Submitted by the Author: | 13-Sep-2022                                                                                                                                                                                                                                                                                                                                                                                                                                                                                                                                                                                                                                                                                                                                                                                                                                                                                                                                                                                                                                                                                                                                                                        |
| Complete List of Authors:     | <p>Culvenor, Adam; La Trobe University<br/> West, Tom; La Trobe University<br/> Bruder, AM; La Trobe University, Physiotherapy<br/> Scholes, Mark; La Trobe University<br/> Barton, Christian; La Trobe University College of Science Health and Engineering, Sport and Exercise Medicine Research Centre<br/> Roos, Ewa; Syddansk Universitet Det Sundhedsvidenskabelige Fakultet, Sports Science and Clinical Biomechanics<br/> Oei, Edwin; Erasmus Universiteit Rotterdam<br/> McPhail, Steven; Queensland University of Technology, Australian Centre for Health Service Innovation and School of Public Health &amp; Social Work<br/> Souza, Richard; University of California San Francisco, Department of Radiology and Biomedical Imaging<br/> Lee, Jusuk; University of California San Francisco, Department of Radiology and Biomedical Imaging<br/> Patterson, Brooke; La Trobe University, La Trobe Sport and Exercise Medicine Research Centre, College of Science, Health and Engineering<br/> Girdwood, Michael; La Trobe University<br/> Couch, Jamon L; La Trobe University<br/> Crossley, Kay; La Trobe University College of Science Health and Engineering</p> |
| Keywords:                     | Knee < ORTHOPAEDIC & TRAUMA SURGERY, REHABILITATION MEDICINE, SPORTS MEDICINE                                                                                                                                                                                                                                                                                                                                                                                                                                                                                                                                                                                                                                                                                                                                                                                                                                                                                                                                                                                                                                                                                                      |
|                               |                                                                                                                                                                                                                                                                                                                                                                                                                                                                                                                                                                                                                                                                                                                                                                                                                                                                                                                                                                                                                                                                                                                                                                                    |

SCHOLARONE™  
Manuscripts

1  
2  
3  
4  
5  
6  
7  
8  
9  
10  
11  
12  
13  
14  
15  
16  
17  
18  
19  
20  
21  
22  
23  
24  
25  
26  
27  
28  
29  
30  
31  
32  
33  
34  
35  
36  
37  
38  
39  
40  
41  
42  
43  
44  
45  
46  
47  
48  
49  
50  
51  
52  
53  
54  
55  
56  
57  
58  
59  
60

# 1 **SU**pervised exercise-therapy and Patient Education Rehabilitation (SUPER) 2 **versus minimal intervention for young adults at risk of knee osteoarthritis** 3 **after ACL reconstruction: SUPER-Knee randomised controlled trial protocol**

4  
5  
6 Adam G Culvenor<sup>1, 2</sup>, Thomas J West<sup>1, 2</sup>, Andrea M Bruder<sup>1, 2</sup>, Mark J Scholes<sup>1, 2</sup>, Christian J Barton<sup>1, 2</sup>,  
7 Ewa M Roos<sup>3</sup>, Edwin Oei<sup>4</sup>, Steven M McPhail<sup>5, 6</sup>, Richard B Souza<sup>7</sup>, Jusuk Lee<sup>8</sup>, Brooke E Patterson<sup>1, 2</sup>,  
8 Michael A Girdwood<sup>1, 2</sup>, Jamon L Couch<sup>1, 2</sup>, Kay M Crossley<sup>1, 2</sup>

- 9
- 10
- 11 1. La Trobe Sport and Exercise Medicine Research Centre, School of Allied Health, La Trobe
- 12 University, Bundoora, Victoria, Australia
- 13 2. Australian IOC Research Centre, La Trobe University, Bundoora, Victoria, Australia
- 14 3. Department of Sports Science and Clinical Biomechanics, University of Southern Denmark,
- 15 Odense, Denmark
- 16 4. Department of Radiology & Nuclear Medicine, Erasmus MC Rotterdam, Rotterdam, The
- 17 Netherlands
- 18 5. Australian Centre for Health Services Innovation & Centre for Healthcare Transformation,
- 19 School of Public Health & Social Work, Queensland University of Technology, Kelvin Grove,
- 20 Queensland, Australia
- 21 6. Clinical Informatics Directorate, Metro South Health, Woolloongabba, Queensland, Australia
- 22 7. Department of Physical Therapy and Rehabilitation Science, University of California, San
- 23 Francisco, California, USA
- 24 8. Department of Radiology and Biomedical Imaging, University of California, San Francisco,
- 25 California, USA
- 26
- 27

## 28 **Corresponding Author:**

29 Dr Adam Culvenor  
30 La Trobe Sport and Exercise Medicine Research Centre,  
31 La Trobe University,  
32 Kingsbury Drive, Bundoora, 3086  
33 Victoria, Australia  
34 Phone: +61 9479 5116  
35 Email: [a.culvenor@latrobe.edu.au](mailto:a.culvenor@latrobe.edu.au)

36  
37 **Word count:** 4,335

1  
2  
3 38 **ABSTRACT**  
4

5 39 **Introduction:** Anterior cruciate ligament injury and reconstruction (ACLR) is often associated with pain,  
6  
7 40 functional loss, poor quality of life and accelerated knee osteoarthritis development. The effectiveness  
8  
9 41 of interventions to enhance outcomes for those at high risk of early-onset osteoarthritis is unknown.  
10  
11 42 This study will investigate if SUPERvised exercise-therapy and Patient Education Rehabilitation (SUPER)  
12  
13 43 is superior to a minimal intervention control for improving pain, function and quality of life in young  
14  
15 44 adults with ongoing symptoms following ACLR.  
16  
17  
18  
19  
20

21 46 **Methods and analysis:** The SUPER-Knee study is a parallel-group, assessor-blinded, randomised  
22  
23 47 controlled trial. Following baseline assessment, 184 participants aged 18-40 years and 9-36 months  
24  
25 48 post-ACLR with ongoing symptoms will be randomly allocated to one of two treatment groups (1:1  
26  
27 49 ratio). Ongoing symptoms will be defined as a mean score of <80/100 from four Knee injury and  
28  
29 50 Osteoarthritis Outcome Score (KOOS<sub>4</sub>) subscales covering pain, symptoms, function in sports and  
30  
31 51 recreational activities and knee-related quality of life. Participants randomised to SUPER will receive a  
32  
33 52 4-month individualised, physiotherapist-supervised strengthening and neuromuscular programme  
34  
35 53 with education. Participants randomised to minimal intervention (i.e., control group) will receive a  
36  
37 54 printed best-practice guide for completing neuromuscular and strengthening exercises following ACLR.  
38  
39 55 The primary outcome will be change in the KOOS<sub>4</sub> from baseline to 4 months with a secondary  
40  
41 56 endpoint at 12 months. Secondary outcomes include change in individual KOOS subscale scores,  
42  
43 57 patient-perceived improvement, health-related quality of life, kinesiophobia, physical activity, thigh  
44  
45 58 muscle strength, knee function and knee cartilage morphology (i.e., lesions, thickness) and  
46  
47 59 composition (T2 mapping) on magnetic resonance imaging. Blinded intention-to-treat analyses will be  
48  
49 60 performed. Findings will also inform cost-effectiveness analyses.  
50  
51  
52  
53  
54

55  
56  
57 62 **Ethics and dissemination:** This study is approved by the La Trobe University and Alfred Hospital  
58  
59  
60

63 Ethics Committees. Results will be presented in peer-reviewed journals and at international  
64 conferences.

65

66 **Trial registration:** ACTRN12620001164987

67

68 **Keywords:**

69 anterior cruciate ligament, rehabilitation, osteoarthritis, knee, physiotherapy, exercise.

70

71

72 **Strengths and limitations of this study**

- 73 • This will be the first sufficiently powered trial to evaluate the effectiveness of exercise-  
74 therapy and education on improving the symptomatic burden in young adults at risk of OA  
75 following a traumatic knee injury.
- 76 • The exercise-therapy programme was developed and piloted with patients and clinicians,  
77 aligns with American College of Sports Medicine (ACSM) recommendations, and is described  
78 based on the Consensus on Exercise Reporting Template (CERT).
- 79 • Evaluating change from baseline to 4 months (primary endpoint) and 12 months will  
80 facilitate longer-term effectiveness evaluation of exercise-therapy and education.
- 81 • This trial will evaluate both the illness (i.e., symptoms) and disease (i.e., structure) of OA and  
82 include cost-effectiveness analysis.
- 83 • While outcome assessors are blinded to group allocation and physiotherapists delivering the  
84 intervention are blinded to the control intervention, owing to the type of interventions,  
85 blinding of participants is not possible.

86

## 87 INTRODUCTION

88 Anterior cruciate ligament (ACL) rupture is one of the most common serious knee injuries in young,  
89 healthy people participating in sports involving jumping, pivoting and cutting activities<sup>1</sup>. Treatment  
90 success is often judged on a timely return to sport<sup>2</sup>. Yet, 55% do not return to competitive sport<sup>3</sup>, and  
91 half will develop post-traumatic knee osteoarthritis (OA), unacceptable persistent pain, functional loss  
92 and poor quality of life before the age of 40 years<sup>4-7</sup>. Occupational and carer responsibilities in many  
93 of these young adults also creates formidable societal and economic burden.

94  
95 Osteoarthritis can be characterised by symptoms such as pain and functional limitations and/or  
96 structural joint changes seen on imaging. Both symptoms and structural changes are common within  
97 the first decade after ACL reconstruction (ACLR), yet they are often discordant<sup>5 8</sup>. International  
98 government-endorsed OA initiatives recommend evaluating symptoms and structure in OA clinical  
99 trials to address the heterogeneity of the disease<sup>9</sup>.

100  
101 Identifying interventions that can improve knee-related symptoms and prevent or slow structural  
102 changes in young adults following ACLR is an international priority<sup>10</sup>. Exercise-therapy improves pain  
103 and function in older populations with primary (non-traumatic) knee OA<sup>11</sup>, but effective treatments to  
104 improve structure (i.e., disease-modifying interventions) have thus far proved elusive<sup>12</sup>. Secondary  
105 prevention strategies for those with early manifestations (or at high risk) of OA, such as following ACLR,  
106 offer potential to alter the OA trajectory<sup>13</sup>. Targeted exercise-therapy might slow structural  
107 worsening<sup>14</sup>, with preliminary studies reporting improved knee cartilage composition in people at risk  
108 of OA (post-meniscectomy)<sup>15</sup> and with non-traumatic early OA over 4 and 12 months, respectively<sup>16 17</sup>.

109  
110 People who report inadequate recovery (ongoing symptoms and impaired function) one year after  
111 ACLR are likely to have worsening symptoms and rapidly deteriorating joint structure in the future<sup>18-</sup>  
112 <sup>20</sup>. These young adults with inadequate recovery urgently need treatment options to alter their OA

1  
2  
3 113 trajectory. Our feasibility study indicated that a full-scale randomised controlled trial (RCT) evaluating  
4  
5 114 a physiotherapist-led, exercise-therapy and education programme for young adults with ongoing  
6  
7 115 symptoms approximately one year after ACLR (i.e., when no further improvement is likely without  
8  
9  
10 116 treatment) is feasible and likely associated with a clinically worthwhile effect for pain, function and  
11  
12 117 quality of life<sup>21</sup>.

13  
14 118

15  
16 119 The primary aim of this RCT is to estimate the average effect of SUPervised exercise-therapy and  
17  
18 120 Patient Education Rehabilitation (SUPER) compared to a minimal intervention control on knee-related  
19  
20 121 pain, function and quality of life in young adults with ongoing symptoms at high risk of early-onset  
21  
22 122 knee OA 9-36 months after ACLR. We hypothesise that the SUPER intervention will result in greater  
23  
24 123 improvements in knee-related pain, symptoms, function and quality of life after 4 months (primary  
25  
26 124 endpoint) and 12 months (secondary endpoint) compared to a minimal intervention control.  
27  
28 125 Secondary aims are to assess 4- and 12-month effectiveness of SUPER on: i) self-reported global rating  
29  
30 126 of change (GROC) and achievement of acceptable symptoms; ii) health-related quality of life; iii)  
31  
32 127 physical activity; iv) kinesiophobia; v) thigh muscle strength and function; and vi) change in knee  
33  
34 128 cartilage health. Intervention and healthcare resource use will also be recorded to inform economic  
35  
36 129 evaluation.  
37  
38  
39  
40  
41  
42  
43  
44

41 130

43 131

## 45 132 **METHODS AND ANALYSIS**

### 47 133 **Study design**

48  
49  
50 134 This study protocol describes a pragmatic, parallel-group assessor-blinded RCT conforming to the  
51  
52 135 Standard Protocol Items: Recommendations for Interventional Trials (SPIRIT) statement<sup>22</sup>. Reporting  
53  
54 136 of the completed RCT will conform to the Consolidated Standards of Reporting Trials (CONSORT)  
55  
56 137 statement for reporting RCTs<sup>23</sup> in conjunction with the Template for Intervention Description and  
57  
58 138 Replication (TiDiER)<sup>24</sup>, and the Consensus on Exercise Reporting Template (CERT) guidelines<sup>25</sup>. The trial  
59  
60

139 will be conducted at a single university site (La Trobe University) in Melbourne, Australia with  
 140 enrolment planned to occur over three years (2021-2023) and 12-month follow-up completed in 2024.  
 141 The primary endpoint will be at 4 months, with additional follow-up at a minimum of 12 months  
 142 (further longer-term follow-up dependent on funding). The study was prospectively registered on the  
 143 Australian & New Zealand Clinical Trial Registry (ACTRN12620001164987).

## 145 **Participants**

146 One hundred and eighty-four young adults fulfilling the eligibility criteria (table 1) will be included.

148 **Table 1.** Eligibility criteria

| Inclusion criteria                                                                                                                                                                                | Exclusion criteria                                                                                                                                       |
|---------------------------------------------------------------------------------------------------------------------------------------------------------------------------------------------------|----------------------------------------------------------------------------------------------------------------------------------------------------------|
| Aged 18-40 years at the time of ACLR                                                                                                                                                              | Synthetic ACLR graft                                                                                                                                     |
| 9-36 months following ACLR                                                                                                                                                                        | Concomitant intra-articular knee fracture                                                                                                                |
| Symptomatic ACLR knee: mean score of <80/100 from four Knee injury and OA Outcome Score (KOOS <sub>4</sub> ) subscales covering pain, symptoms, function in sports/recreation and quality of life | Planning to relocate interstate/internationally in following 12 months or unable to commit to study assessments                                          |
| Willing and able to participate in exercise-therapy 2-3 times per week for at least 4 months                                                                                                      | Knee re-injury, surgery or injection in past 3 months (either knee)                                                                                      |
|                                                                                                                                                                                                   | Undertaken rehabilitation in past 6 weeks (for conditions affecting either knee)                                                                         |
|                                                                                                                                                                                                   | Contraindications to MRI                                                                                                                                 |
|                                                                                                                                                                                                   | Planning knee surgery in following 12 months (e.g., graft rupture, cyclops lesion (localised anterior arthrofibrosis) on MRI)                            |
|                                                                                                                                                                                                   | Other reasons for exclusion (health condition affecting physical function, mentally unable to participate, pregnancy, unable to understand English, etc) |

149 ACLR, anterior cruciate ligament reconstruction; MRI, magnetic resonance imaging

## 151 **Recruitment procedure**

152 Trial flow is outlined in figure 1. Participants will be recruited from approximately 15 collaborating  
 153 private orthopaedic surgeons and eight public hospital sites in Victoria, Australia. Consistent with our  
 154 pilot work<sup>26 27</sup>, potentially eligible participants (i.e., individuals with an ACLR from our network of



1  
2  
3 155 collaborating private orthopaedic surgeons or public hospitals) will be mailed study information  
4  
5 156 inviting them to contact a member of the research team. Additional participants will be recruited from  
6  
7 157 the general community via advertisements in local newspapers, community magazines and  
8  
9  
10 158 newsletters (e.g., university staff bulletins, sports club newsletters), posters in the community and  
11  
12 159 social media.

13  
14 160

15  
16 161 Volunteers responding to the invitation letter or advertisements will be screened for eligibility using a  
17  
18 162 three-stage process. Firstly, screening questions will be asked via telephone or e-mail. Secondly,  
19  
20 163 potentially suitable volunteers will be sent the Knee injury and OA Outcome Score (KOOS)  
21  
22 164 questionnaire electronically (or hard copy if preferred) to confirm symptomatic eligibility. Thirdly,  
23  
24 165 baseline magnetic resonance imaging (MRI) scans will be assessed to confirm the absence of any  
25  
26 166 pathology potentially necessitating surgery (e.g., graft rupture, symptomatic cyclops lesion).

27  
28  
29  
30 167

31  
32 168 ---FIGURE 1 HERE---

33  
34 169

### 35 36 170 **Randomisation procedure, concealment of allocation and blinding**

37  
38 171 Eligible, willing and consenting volunteers will be randomised to the SUPER or control group after  
39  
40 172 baseline assessment, commencing as soon as possible. A computer-generated randomisation schedule  
41  
42 173 has been developed *a priori* by an independent statistician in random permuted blocks of 4-8 to  
43  
44 174 maintain a periodic allocation ratio of 1:1. To ensure concealed allocation, the randomisation schedule  
45  
46 175 will be stored electronically in the secure Research Electronic Data Capture (REDCap) system and only  
47  
48 176 accessible to an unblinded researcher once baseline measures have been obtained. Investigators  
49  
50 177 conducting study assessments will be blind to group allocation. As the primary outcome is self-  
51  
52 178 reported, participants are considered assessors; therefore, participants (and thus assessors) will be  
53  
54 179 blinded to previous scores. Physiotherapists and participants cannot be blinded to group allocation  
55  
56 180 owing to the type of interventions. An independent statistician, blinded to group allocation, will

1  
2  
3 181 perform the primary RCT analysis. To reduce risk of interpretation bias, blinded results from the  
4  
5 182 analyses (Group A compared with Group B) will be presented to all authors, who will agree on two  
6  
7 183 alternative written interpretations before the data manager unblinds the randomisation code.<sup>28</sup>  
8  
9

10 184

## 11 185 **Interventions**

### 12 186 ***Supervised exercise-therapy and Patient Education Rehabilitation (SUPER)***

13  
14  
15  
16 187 Participants allocated to SUPER will participate in a supervised exercise programme, developed based  
17  
18 188 on best available evidence for patients with ACLR and other knee injuries including OA<sup>29-31</sup>, and with  
19  
20 189 input from patients and experienced physiotherapists. An overview of the SUPER programme aligning  
21  
22 190 to the CERT guidelines is contained in Supplementary File 1 and summarised as per TIDieR guidelines  
23  
24 191 in table 2. The SUPER intervention aims to increase lower-limb muscle strength, endurance and power,  
25  
26 192 functional performance and neuromuscular control, increase understanding of knee health, facilitate  
27  
28 193 return to desired sports activity and enhance physical activity. Registered physiotherapists with  $\geq 3$   
29  
30 194 years of experience treating patients following ACLR will deliver SUPER in community settings following  
31  
32 195 a 4-hour training workshop supplemented with three hours of online webinars. To minimise  
33  
34 196 participant travel burden, study physiotherapists will be located at 12-14 private physiotherapy clinics  
35  
36 197 across greater Melbourne and regional Victoria.  
37  
38  
39  
40

41 198

42  
43 199 SUPER is divided into two phases.

44  
45 200 Phase 1: 0-4 months. Participants will be provided with details of the SUPER intervention verbally and  
46  
47 201 via an intervention handbook detailing all exercises and an exercise logbook, and provided access to  
48  
49 202 videos of all exercises. Participants will complete their exercise programme 2-3 times per week in  
50  
51 203 Phase 1, made up of 1-2 weekly supervised sessions and 1-2 weekly unsupervised sessions at a gym or  
52  
53 204 home (total 2-3 weekly sessions) (table 2). Participants/physiotherapists will also have the option of a  
54  
55 205 second opinion by a member of our clinical expert physiotherapy team if SUPER is failing to facilitate  
56  
57  
58  
59  
60

1  
2  
3 206 improvement (either at 2- or 4-months post-baseline). Second opinion will provide assessment and  
4  
5 207 guidance on exercise-therapy and patient education needs.  
6

7  
8 208

9  
10 209 Phase 2: (5-12 months). The intervention provided in Phase 2 will depend on whether the following  
11  
12 210 predefined criteria are met at the 4-month follow-up assessment: participant's goals are met,  
13  
14 211 participant satisfied with current symptoms/function and GROC reported as at least 'better').  
15

16 212

17  
18 213 For participants meeting all criteria, Phase 2 will involve ongoing independent exercise-therapy  
19  
20 214 sessions (approximately 30-60 minutes duration, 2-3 x per week at a gym or home). Participants may  
21  
22 215 request a physiotherapy booster session if they become unsure about continuing self-management or  
23  
24 216 exercise-therapy or pre-defined criteria are no longer met. Booster sessions can continue once per  
25  
26 217 week and will focus on the priority exercises and discussion of self-management strategies.  
27  
28

29 218

30  
31 219 Participants not meeting all criteria at the end of Phase 1 will be offered ongoing once per week  
32  
33 220 supervised exercise-therapy in Phase 2. Once all criteria are met, participants will continue  
34  
35 221 unsupervised exercise-therapy sessions at a gym or home with physiotherapy booster sessions as  
36  
37 222 required (as per above criteria). All participants will be offered a membership to a local gym to  
38  
39 223 encourage unsupervised exercise-therapy during Phase 2. An additional booster session with the  
40  
41 224 treating physios will occur at 8- and 11-months post-baseline.  
42  
43

44 225

45  
46 226 Exercise-therapy will be tailored to each participant to match their individual preferences, goals and  
47  
48 227 clinical presentation (e.g., muscle strength, pain severity, and personal, sporting, work and functional  
49  
50 228 needs). The exercise-therapy programme consists of five "priority" exercises and four optional  
51  
52 229 exercises (table 2, Supplementary File 2). The total number of exercises prescribed (maximum number  
53  
54 230 of nine) will depend on the participant's available time and willingness, and physiotherapist clinical  
55  
56 231 reasoning – but will always include the five "priority" exercises.  
57  
58  
59  
60

1  
2  
3 232

4  
5 233 Each exercise has 3-6 levels of difficulty. Physiotherapists will supervise and progress exercises based  
6  
7 234 on defined criteria guided by American College of Sports Medicine strength training principles<sup>32</sup> and  
8  
9 235 perceived difficulty using rating of perceived exertion and minimal pain (e.g., <3/10 on numerical pain  
10  
11 236 scale) (details in Supplementary File 1).

12  
13  
14 237

15  
16 238 Patient education was co-designed with experienced physiotherapists and pilot study participants<sup>21</sup>  
17  
18 239 and aims to support the exercise-therapy programme and build motivation and capability to sustain  
19  
20 240 the exercises during and after the initial 4-month supervised phase (table 2). Individualised health  
21  
22 241 education regarding expectations and goals, exercise principles, improving adherence, pain/fear  
23  
24 242 management, long-term outcomes, weight control, and appropriate physical, occupational and  
25  
26 243 sporting activity promotion, will be delivered during the physiotherapy treatment sessions. Two  
27  
28 244 dedicated education sessions of 45-60 minutes duration will be delivered during Phase 1 (week 1 and  
29  
30 245 week 4). Participants will be counselled regarding physical activity levels with a targeted training  
31  
32 246 program adhering to Australian Physical Activity Guidelines and given an activity monitor (Garmin  
33  
34 247 vívofit® 4 activity tracker) if they do not have access to one to support measurement and attainment  
35  
36 248 of physical activity goals.  
37  
38  
39  
40  
41  
42  
43  
44  
45  
46  
47  
48  
49  
50  
51  
52  
53  
54  
55  
56  
57  
58  
59  
60

249 **Table 2: Overview of intervention delivery described according to the TIDieR guidelines**

| 1. Brief name        | SUPER intervention                                                                                                                                                                                                                                                                                                                                                                                                                                                                                                                                                                                              | Minimal intervention control                                                                                                                                                                                                                                           |
|----------------------|-----------------------------------------------------------------------------------------------------------------------------------------------------------------------------------------------------------------------------------------------------------------------------------------------------------------------------------------------------------------------------------------------------------------------------------------------------------------------------------------------------------------------------------------------------------------------------------------------------------------|------------------------------------------------------------------------------------------------------------------------------------------------------------------------------------------------------------------------------------------------------------------------|
| 2. Why               | Exercise-therapy to enhance muscle strength, function and physical activity can improve pain and quality of life in older adults with OA <sup>11</sup> and address risk factors for post-traumatic OA <sup>33</sup> .                                                                                                                                                                                                                                                                                                                                                                                           | The booklet was produced based on information provided to patients and thus, accurately reflects usual care.                                                                                                                                                           |
| 3. What materials    | Participants receive an intervention handbook detailing all study details, exercises and logbook, and access to videos of all exercises.                                                                                                                                                                                                                                                                                                                                                                                                                                                                        | Participants receive a “best-practice guide” booklet of possible exercises with no specific exercise prescription frequency.                                                                                                                                           |
| 4. What procedures   | Five priority exercises targeting: i) weight-bearing knee extension; ii) open-chain knee extension; iii) knee flexion; iv) balance/agility; v) plyometrics <b>and</b> four optional exercises targeting: a) trunk; b) hip abductors; c) hip adductors; d) calf – each with 3-6 levels of difficulty. Physiotherapists prescribe strength exercises (3 x 8-12 reps) with perceived exertion criteria (aim $\geq 7/10$ ) and progressed as per ACSM and periodisation guidelines (1 week/month easier $\sim 5/10$ exertion). Dedicated education sessions at week 1 and week 4, supported by slides and booklets. | Booklet explained at randomisation. Exercise options provided (similar to SUPER intervention), but not prescribed. Participants expected to exercise unsupervised. Participants may contact the physiotherapist by phone once only to ask questions/get clarification. |
| 5. Who provided      | Registered physiotherapists with $\geq 3$ years of relevant experience, trained to deliver all components (exercise and education).                                                                                                                                                                                                                                                                                                                                                                                                                                                                             | One appointment with a registered physiotherapist with $\geq 3$ years clinical experience, not involved in delivering SUPER intervention, to explain booklet elements.                                                                                                 |
| 6. How               | Delivered supervised in groups and individually (supported by unsupervised sessions) in Phase 1, progressing to completely unsupervised in Phase 2.                                                                                                                                                                                                                                                                                                                                                                                                                                                             | Delivered unsupervised.                                                                                                                                                                                                                                                |
| 7. Where             | Supervised sessions at private physiotherapy clinics and unsupervised sessions at gym/home.                                                                                                                                                                                                                                                                                                                                                                                                                                                                                                                     | Booklet explained at La Trobe University, Melbourne. Gym and home exercise options provided.                                                                                                                                                                           |
| 8. When and how much | <u>Phase 1 (0-4 months):</u><br><u>Frequency and Duration</u><br>Supervised sessions (30-60 mins) 1-2 times/week<br>Unsupervised sessions (30-60 mins) 1-2 times/week                                                                                                                                                                                                                                                                                                                                                                                                                                           | Unsupervised exercise-therapy (self-prescribed frequency) after one face-to-face appointment.                                                                                                                                                                          |

---

|                               |                                                                                                                                                                                                                                                                                                                                                                         |                                               |
|-------------------------------|-------------------------------------------------------------------------------------------------------------------------------------------------------------------------------------------------------------------------------------------------------------------------------------------------------------------------------------------------------------------------|-----------------------------------------------|
|                               | <i>Number of Sessions:</i>                                                                                                                                                                                                                                                                                                                                              |                                               |
|                               | 32 supervised + 16 unsupervised                                                                                                                                                                                                                                                                                                                                         |                                               |
|                               | <u>Phase 2 (5-12 months):</u>                                                                                                                                                                                                                                                                                                                                           |                                               |
|                               | <i>Frequency and Duration</i>                                                                                                                                                                                                                                                                                                                                           |                                               |
|                               | Progress to unsupervised sessions 2-3 times weekly<br>(dependent on meeting predefined criteria*).                                                                                                                                                                                                                                                                      |                                               |
|                               | Two supervised (booster) sessions at 8 and 11 months<br>post-baseline.                                                                                                                                                                                                                                                                                                  |                                               |
|                               | <i>Number of Sessions:</i>                                                                                                                                                                                                                                                                                                                                              |                                               |
|                               | 2 supervised + 108 unsupervised                                                                                                                                                                                                                                                                                                                                         |                                               |
| <b>9. Tailoring</b>           | Tailored selection and progression of lower-limb muscle strength, power and neuromuscular control exercises and education based on participant preferences, goals and clinical presentation.                                                                                                                                                                            | Standardised exercise examples and education. |
| <b>10. Modifications</b>      | Modifications will be reported. If state and/or institution COVID-19 pandemic restrictions prevent face-to-face follow-up assessments, participants will be encouraged to continue assigned treatment until face-to-face assessments can be conducted. If restrictions prevent supervised rehabilitation, telerehabilitation options will be offered wherever possible. |                                               |
| <b>11. How well (planned)</b> | Treating physiotherapists receive prior training in how to deliver and supervise the programme. Fidelity assessed by auditing. Participant adherence to supervised and unsupervised sessions assessed through logbooks, clinic attendance sheets and online (fortnightly/monthly) questionnaire.                                                                        |                                               |
| <b>12. How well (actual)</b>  | This will be reported in the primary paper.                                                                                                                                                                                                                                                                                                                             |                                               |

---

250 SUPER, SUPervised exercise-therapy and Patient Education Rehabilitation; OA, osteoarthritis; ACSM, American College of Sports Medicine

251 \* predefined criteria for ceasing supervised sessions in Phase 2 = participant's goals are met, participant satisfied with current symptoms/function, and global  
252 rating of change reported as at least 'better'.  
253

254

255

256

257

258

259

260

261

262

263

264

265

1  
2  
3 255 **Minimal intervention control**  
4

5 256 Reflecting current standard care, the minimal intervention control group will receive a “best-practice  
6  
7 257 guide” booklet and one face-to-face appointment with a registered physiotherapist with  $\geq 3$  years of  
8  
9 258 clinical experience (not involved in treating participants in the SUPER intervention) to explain booklet  
10  
11 259 elements and answer questions about its contents. The booklet outlines similar exercises and patient  
12  
13 260 education as in the SUPER intervention (Supplementary File 3). However, exercise is expected to be  
14  
15 261 performed unsupervised (table 2). Participants may also contact the treating physiotherapist by phone  
16  
17 262 on one occasion to ask questions or get further clarification but will not be provided with information  
18  
19 263 extending the scope of the booklet. The booklet was produced based on the information provided by  
20  
21 264 ten high volume orthopaedic surgeons in Melbourne to their patients post-ACLR. Participants will be  
22  
23 265 encouraged at the 4-month assessment to continue following the booklet up until the 12-month  
24  
25 266 assessment.  
26  
27  
28  
29

30 267  
31  
32 268 Irrespective of group allocation, participants will be asked to refrain from other musculoskeletal  
33  
34 269 therapies (e.g., chiropractic care, osteopathy, myotherapy, intra-articular injections) for their knee  
35  
36 270 pain during the trial. Participants will be allowed to continue care for other unrelated pre-existing  
37  
38 271 conditions.  
39  
40

41 272

42  
43 273 **Data collection procedure**  
44

45 274 Data will be collected at baseline and 2, 4 and 12 months after randomisation, with 4 months the *a*  
46  
47 275 *priori* primary endpoint as this coincides with the completion of the supervised exercise-therapy  
48  
49 276 intervention in Phase 1. Where possible, data will be collected and managed using a secure web-based  
50  
51 277 software platform (Research Electronic Data Capture; REDCap) hosted at La Trobe University<sup>34</sup>, which  
52  
53 278 has equivalent measurement properties to paper-based completion<sup>35</sup>. This strategy was used in our  
54  
55 279 pilot study following ACLR, with demonstrated feasibility<sup>21</sup>. Paper versions will also be available if  
56  
57 280 preferred by participants.  
58  
59  
60

281

282 **Outcomes**283 ***Baseline characteristics***

284 Participant characteristics including height, body mass, waist girth, leg length, knee injury and  
 285 rehabilitation details, socioeconomic details (e.g., education level, employment status), family history  
 286 of OA, sporting history and health literacy (Rapid Estimate of Adult Literacy in Medicine: REALM<sup>36</sup>) will  
 287 be collected. Surgical details will be recorded from surgical files including date, graft type, and  
 288 concomitant injuries/procedures. We will also record knee-related objective measures (table 3).

289

290 **Table 3.** Overview of data collection

|                                              | Baseline | 2 months | 4 months | 12 months |
|----------------------------------------------|----------|----------|----------|-----------|
| <b>Participant characteristics</b>           |          |          |          |           |
| Age                                          | X        |          |          |           |
| Sex                                          | X        |          |          |           |
| Height, body mass, waist girth               | X        |          | X        | X         |
| Country of birth                             | X        |          |          |           |
| Education level                              | X        |          |          |           |
| Living situation                             | X        |          |          |           |
| Smoking history                              | X        |          |          |           |
| Health literacy (REALM)                      | X        |          |          |           |
| Employment status                            | X        |          | X        | X         |
| Prior knee injury/treatment                  | X        |          |          |           |
| ACL injury, surgery & rehabilitation details | X        |          |          |           |
| History of sport participation               | X        |          |          |           |
| Family history of osteoarthritis             | X        |          |          |           |
| Medication use                               | X        |          |          |           |
| Comorbidities                                | X        |          |          |           |
| Flexion/extension range of motion            | X        |          | X        | X         |
| Joint line tenderness (medial and lateral)   | X        |          | X        | X         |
| Crepitus                                     | X        |          | X        | X         |
| Effusion (sweep test)                        | X        |          | X        | X         |
| Stability (Lachman's, Pivot shift)           | X        |          |          |           |
| <b>Patient-reported Outcomes</b>             |          |          |          |           |
| Knee injury Osteoarthritis Outcome Score     | X        | X        | X        | X         |
| EQ-5D-5L                                     | X        | X        | X        | X         |
| Tegner Activity Scale                        | X        | X        | X        | X         |
| Tampa Scale of Kinesiophobia                 | X        |          | X        | X         |
| Global rating of change                      |          | X        | X        | X         |
| Patient acceptable symptoms state            | X        | X        | X        | X         |
| Health and Labour Questionnaire              | X        |          | X        | X         |
| Work Limitations Questionnaire               | X        |          | X        | X         |
| ACL-Quality of Life Questionnaire            | X        |          | X        | X         |



---

**Physical performance tests**

|                                 |   |   |   |
|---------------------------------|---|---|---|
| Hop performance (four tests)    | X | X | X |
| One-leg rise                    | X | X | X |
| Isometric thigh muscle strength | X | X | X |
| Lower-limb loading              | X | X | X |
| <b>MRI outcomes</b>             | X | X | X |
| <b>Average daily steps</b>      | X | X | X |

291 ACL, anterior cruciate ligament; MRI, magnetic resonance imaging; REALM, Rapid Estimate of Adult Literacy in  
292 Medicine

293 All participants will receive either a fortnightly (during Phase 1) or monthly (during Phase 2) online  
294 questionnaire via the secure online platform (REDCap) (or hard copy mailed, or phone call depending on  
295 participant preference) to assess sports activity, adherence to exercise-therapy, and any adverse events/other  
296 treatment.

297  
298

299 **Primary outcome**

300 The primary outcome is the change in KOOS<sub>4</sub> score from baseline to 4-month follow-up. KOOS<sub>4</sub> is the  
301 mean score for the self-reported KOOS subscales pain, symptoms, function in sports and recreational  
302 activities and quality of life, which has been used in RCTs following ACL injury<sup>37</sup>. The KOOS<sub>4</sub> and all  
303 KOOS subscale scores range from 0 (worst) to 100 (best). The KOOS is a valid and reliable knee-specific  
304 questionnaire for assessing patient-reported outcomes in various knee injury populations (e.g., from  
305 knee injury to OA) and is widely used globally<sup>38 39</sup>.

306

307 **Secondary outcomes**

308 *KOOS subscales*

309 To allow for clinical in-depth interpretation, scores for the five KOOS subscales will be reported  
310 individually (i.e., pain, symptoms, function in sports and recreational activities, activities of daily living,  
311 and quality of life)<sup>38</sup>.

312

313 *Physical performance*

314 Peak isometric knee extensor and flexor muscle strength and rate of force development will be  
315 assessed in sitting using reliable and valid methods at 60° of knee flexion on isokinetic equipment  
316 (Biodex Medical Systems, NY, USA)<sup>40</sup>. A battery of lower-limb functional tasks commonly used  
317 following ACLR will assess functional performance: i) single hop for distance; ii) triple cross-over hop

1  
2  
3 318 for distance; iii) side-hop; iv) vertical hop; and v) one-leg rise<sup>5 41 42</sup>. Such a battery produces high  
4  
5 319 reliability and sensitivity in populations following ACLR<sup>43</sup>. Details of physical performance tests are  
6  
7 320 contained in Supplementary File 4.  
8  
9

10 321

11  
12 322 *Perceived global change score and patient acceptable symptom state*

13  
14 323 Global rating of change (GROC) will be assessed for pain and function with the questions: ‘Overall, how  
15  
16 324 has your knee pain changed since the start of the study?’ and ‘Overall, how has your knee function  
17  
18 325 changed since the start of the study?’ Answered on a 7-point Likert scale ranging from ‘much worse’  
19  
20 326 to ‘much better’ and dichotomised to ‘improved’ (‘much better’, ‘better’) versus ‘not improved’ (‘a  
21  
22 327 little better’ to ‘much worse’). Satisfaction with current knee function (i.e., patient acceptable  
23  
24 328 symptom state (PASS)) will be assessed with the question: ‘Considering your knee function, do you feel  
25  
26 329 that your current state is satisfactory? With knee function, you should take into account all activities  
27  
28 330 during your daily life, sport and recreational activities, your level of pain and other symptoms, and also  
29  
30 331 your knee-related quality of life.’ Answered by ‘yes or ‘no’<sup>44</sup>. Participants not satisfied with current  
31  
32 332 knee function at follow-up assessments (i.e., answering ‘no’ to the PASS question) will be asked a  
33  
34 333 second question relating to treatment failure: ‘Would you consider your current state as being so  
35  
36 334 unsatisfactory that you think the treatment has failed?’ Answered by ‘yes’ or ‘no’<sup>44</sup>.  
37  
38  
39  
40

41 335

42  
43 336 *Knee joint structure*

44  
45 337 Unilateral knee MRIs will be obtained in supine with the lower-limb in neutral alignment using a 3T  
46  
47 338 scanner (Signa Pioneer, General Electric Healthcare, Milwaukee, USA) and 18-channel knee coil.  
48  
49 339 Sequences acquired will include proton density weighted fat suppressed fast spin-echo sequences in  
50  
51 340 the sagittal, coronal and axial planes, a T2 mapping multi-echo spin-echo sagittal sequence and a  
52  
53 341 sagittal fast spoiled gradient echo (FSPGR) sequence (Figure 2, Supplementary File 5). Changes in  
54  
55 342 cartilage collagen content and orientation in extracellular matrices reflecting degeneration will be  
56  
57 343 defined by quantitative changes in T2 relaxation times<sup>45</sup> from baseline to 4- and 12-month follow-up  
58  
59  
60

1  
2  
3 344 assessments. Knee cartilage thickness changes over 4 and 12 months will also be assessed<sup>46</sup>. Post-  
4  
5 345 processing software incorporating semi-automated registration and manual segmentation in 3D will  
6  
7 346 be used for both T2 relaxation time and cartilage thickness. Knee OA features (e.g., cartilage defects,  
8  
9  
10 347 meniscal tears, bone marrow lesions, osteophytes) will be scored with established scoring systems<sup>47 48</sup>  
11  
12 348 at baseline and 12-month follow-up by a trained reader blinded to clinical outcomes. Individual OA  
13  
14 349 feature worsening will be defined as increase in the size or depth of lesions as previously established<sup>49</sup>.  
15  
16 350 Bone shape at the knee will also be assessed using edge-detection semi-automated segmentation with  
17  
18  
19 351 3D triangulated meshes of bone rigidly registered on a reference template to extract the most  
20  
21 352 important modes of variation of bone shape<sup>50</sup>.  
22

23 353

24  
25 354 ---FIGURE 2 HERE---

26  
27 355

28  
29  
30 356 ***Other outcomes***

31  
32 357 *Fear of movement*

33  
34 358 Knee-related fear of movement will be assessed with the Tampa Scale for Kinesiophobia<sup>51</sup>.  
35

36 359

37  
38  
39 360 *Physical activity*

40  
41 361 The Tegner Activity Scale will assess self-reported activity level. It is a valid and reliable numerical scale  
42  
43 362 from 0 (sick leave because of knee problems) to 10 (competitive knee-demanding sports at an elite  
44  
45 363 level), with each value indicating the ability to perform certain activities<sup>52</sup>. Objective physical activity  
46  
47 364 will be captured using a Garmin vívofit<sup>®</sup> 4 activity tracker (Garmin<sup>®</sup> International Inc., KS, USA) or  
48  
49 365 participant's own device, if appropriate.  
50

51 366

52  
53  
54 367 *Quality of life*  
55  
56  
57  
58  
59  
60

1  
2  
3 368 We will assess knee-related quality of life, with the ACL-Quality of life questionnaire<sup>53</sup>, and health-  
4  
5 369 related quality of life with the EQ-5D-5L<sup>54</sup>. These measures are reliable and valid for knee pain  
6  
7 370 populations<sup>55 56</sup>.

9 371

#### 12 372 *Lower-limb loading*

14 373 Lower-limb loading will be assessed using ground reaction force data during unilateral and bilateral  
15  
16 374 weight-bearing tasks (squat, hop and drop-jump) using force plates and ForceDecks software (Vald  
17  
18 375 Performance Pty. Ltd., UK).

21 376

#### 23 377 ***Treatment-related outcomes***

##### 25 378 *Adherence, exercise level/intensity and other treatments received during the trial*

27 379 Adherence with the supervised exercise-therapy sessions (i.e., number of sessions attended out of 32  
28  
29 380 Phase 1 sessions) and intensity/progression of the exercises will be recorded by treating  
30  
31 381 physiotherapists and participants. Participants in both groups will record adherence to home exercises  
32  
33 382 and any co-interventions received in a logbook and via fortnightly (Phase 1) and monthly (Phase 2)  
34  
35 383 online questionnaires.

39 384

##### 41 385 *Adverse events*

43 386 Any adverse events will be recorded fortnightly during Phase 1 and monthly during Phase 2 via  
44  
45 387 questionnaires. Furthermore, open probe questioning will enquire about possible adverse events at  
46  
47 388 each of the follow-ups. Healthcare use data obtained as part of cost-effectiveness analysis at final  
48  
49 389 follow-up will also be checked for potential adverse events. An adverse event is defined as any  
50  
51 390 undesirable experience causing participants to seek medical treatment. A serious adverse event is  
52  
53 391 defined as any undesirable event/illness/injury classified as having the potential to significantly  
54  
55 392 compromise clinical outcome or result in significant disability or incapacity, and those requiring  
56  
57  
58  
59  
60

393 inpatient hospital care. Adverse events will be categorised into index knee or other sites and will be  
394 assessed for severity by the trial management committee.

395

#### 396 **Data management**

397 Most outcome data will be collected and managed via REDCap web-based software (hosted at La Trobe  
398 University), facilitating simultaneous data entry. For paper-based data collection, data will be entered  
399 by a single investigator with a second investigator conducting random checks of a subset of manually  
400 entered documents to ensure accuracy. For data analysis, personal data, including participant names,  
401 contact details, date of birth and MRI scans will be stored on the La Trobe University server Research  
402 Drive Storage, separately from deidentified (numbered) data. All subsequent study data will be  
403 identified by participant number only.

404

405 Due to the minimal known risks associated with the interventions being evaluated, this study will not  
406 have a formal data monitoring committee and does not require an interim analysis. Any unexpected  
407 serious adverse events or outcomes will be discussed by the trial management committee (identical  
408 to the authors of this protocol).

409

#### 410 **Sample size calculation**

411 This trial has been powered to detect a clinically significant between-group difference for the primary  
412 outcome of KOOS<sub>4</sub>. The overall effect size for exercise-therapy on self-reported pain and disability is  
413 moderate (0.50)<sup>11</sup>. With this effect size, to achieve 85% power at a two-sided 0.05 significance level on  
414 the KOOS<sub>4</sub>, 146 participants are required. To account for a 20% drop-out, we will recruit 184  
415 participants. This sample size will be sufficient to detect a minimal important change (MIC) in KOOS<sub>4</sub>  
416 of 9-points in patients following ACLR (with standard deviation of 15)<sup>37,57</sup>.

417

#### 418 **Stopping rule**

1  
2  
3 419 If the intended sample size is not reached at 36 months after recruitment commencement, the  
4  
5 420 inclusion of participants will stop at 160, which will ensure a power of 80% for the primary outcome of  
6  
7 421 KOOS<sub>4</sub>, anticipating up to 20% loss to follow-up. Including a minimum of 160 participants will also  
8  
9 422 provide  $\geq 90\%$  power to detect a statistically significant difference ( $\alpha=0.05$ ) on the secondary outcome  
10  
11 423 of cartilage quality on MRI (change in cartilage T2 relaxation time) between the SUPER intervention  
12  
13 424 and minimal intervention control groups (anticipated effect size of 0.59)<sup>17</sup>.  
14  
15  
16  
17 425

### 18 426 **Statistical analyses**

19  
20  
21 427 Analysis will be performed according to the intention-to-treat principle with the statistical analyst  
22  
23 428 blinded to group allocation. Descriptive statistics and generalised linear mixed models (adjusted for  
24  
25 429 baseline measure and referral source (private versus public) as fixed effects) will be used to examine  
26  
27 430 the effect of group allocation on the primary and secondary outcomes. For binomial secondary  
28  
29 431 outcomes (e.g., cartilage defect worsening, proportion of participants 'improved' on the global rating  
30  
31 432 of change scale, proportion of participants who had a KOOS<sub>4</sub> change exceeding the MIC of 9 points),  
32  
33 433 binomial (logistic) family will be selected. As this is a randomised trial, we do not plan to adjust for  
34  
35 434 other potential confounders (e.g., age, gender), but if notable imbalance between groups in potential  
36  
37 435 confounders is observed, we will examine the effect of adjusting for potential confounders (fixed  
38  
39 436 effects). While the primary analysis approach is intention-to-treat, per-protocol analysis will also be  
40  
41 437 conducted excluding those who have poor adherence with the SUPER intervention to assist with  
42  
43 438 clinical interpretation of findings. Planned exploratory sub-group analyses including repeating analysis  
44  
45 439 by injury characteristics (e.g., isolated vs combined ACL injury) will be conducted given the known risk  
46  
47 440 of a combined injury (e.g., concomitant meniscal/cartilage) on OA outcomes<sup>58</sup>. Two sensitivity analyses  
48  
49 441 are planned. The first will use multiple imputation for missing data, assuming this data is considered  
50  
51 442 missing at random. The second will exclude participants who experienced a subsequent new acute  
52  
53 443 traumatic lower-limb injury (or surgery) severe enough to require a period of non-weight bearing  
54  
55  
56  
57  
58  
59  
60

1  
2  
3 444 assuming this may have influenced the outcomes of those participants, unless the injury was sustained  
4  
5 445 while completing the trial intervention activities.  
6

7 446

8  
9  
10 447 **Healthcare resource use and productivity**

11  
12 448 The resources required to deliver each intervention and treatment related healthcare resource use  
13  
14 449 including co-interventions for knee-related symptoms (e.g., medicines, complementary treatments,  
15  
16 450 and details of hospital presentations) will be recorded. This information will be collected from several  
17  
18 451 sources (Medicare and Pharmaceutical Benefits Scheme (MBS and PBS) databases (rebated and out-  
19  
20 452 of-pocket costs), as well as participant logbooks and questionnaires) for the trial period. The Health  
21  
22 453 and Labour Questionnaire<sup>59</sup> and the Work Limitations Questionnaire<sup>60</sup> will also be collected for the  
23  
24 454 trial period to inform estimates of productivity losses.  
25  
26

27 455

28  
29  
30 456 **Process Evaluation**

31  
32 457 Semi-structured interviews will be conducted on a subset of participants (until data saturation is  
33  
34 458 reached) following the intervention. Interviews will explore beliefs/experiences; knowledge and  
35  
36 459 understanding of interventions received including potential benefits; acceptability and perceived  
37  
38 460 effectiveness of the intervention; and reasons for adhering (or not) to exercise-therapy and education  
39  
40 461 provided. Purposive sampling will be used to recruit interview participants based upon characteristics  
41  
42 462 and outcomes of trial. Interviews will be audio recorded, transcribed and analysed using Framework  
43  
44 463 Analysis<sup>61</sup>. Data will be coded deductively according to the code structure generated by the interview  
45  
46 464 topic guide and an inductive thematic analysis will be applied until no new themes emerge.  
47  
48  
49

50 465

51  
52  
53 466 **PATIENT AND PUBLIC INVOLVEMENT**

54  
55 467 Patients and clinicians are integral throughout each stage of this project. Patients and clinicians co-  
56  
57 468 designed the intervention, research questions and study methods. This input was gained from: i)  
58  
59 469 discussions with leading clinicians managing ACL injuries during SUPER development; ii) collation of

1  
2  
3 470 orthopaedic surgeon patient education material to inform the control intervention; iii) qualitative  
4  
5 471 interviews with participants and treating physiotherapists from our pilot study as part of formal  
6  
7 472 process evaluation strategies<sup>21</sup>; iv) qualitative interviews with symptomatic patients with an ACLR as  
8  
9 473 part of our previous studies<sup>62</sup>; and v) patient and clinician focus groups providing feedback on study  
10  
11 474 recruitment material, participant handbooks and education content. Preliminary results will be  
12  
13 475 presented and discussed with patient representatives before the results are written up for peer-  
14  
15 476 review publication. Patients and clinicians will provide input into the dissemination of study results  
16  
17 477 by assisting with the decision on what information to share and in what format.  
18  
19  
20  
21 478

## 22 23 479 **ETHICS AND DISSEMINATION**

24  
25 480 This study complies with the Declaration of Helsinki and has been approved by the La Trobe University  
26  
27 481 Human Research Ethics Committee (HEC-19447), the Alfred Hospital Ethics Committee (HREC 537/19)  
28  
29 482 and Services Australia External Request Evaluation Committee (RMS0879). Written informed consent  
30  
31 483 will be obtained from participants prior to enrolment (Supplementary File 6).  
32  
33  
34 484

35  
36 485 Study outcomes will be widely disseminated through a variety of sources. Primary and key secondary  
37  
38 486 objectives will be submitted to a peer-reviewed journal. Other secondary objectives will be addressed  
39  
40 487 in separate publications. Authorship will be in accordance with guidelines provided by the  
41  
42 488 International Committee of Medical Journal Editors (ICMJE). Our publication strategy will be  
43  
44 489 complemented by submission of abstracts to key national and international conferences. Any  
45  
46 490 important protocol amendments will be reported to the approving ethics committees, registered at  
47  
48 491 ANZCTR and communicated in the primary RCT report.  
49  
50  
51

52 492

## 53 54 493 **DISCUSSION**

55  
56 494 Anterior cruciate ligament injuries and subsequent reconstructions have increased 43% in Australia  
57  
58 495 over the previous 15 years<sup>63</sup>, with similar increases observed in the United States<sup>64</sup>, and greater  
59  
60



1  
2  
3 496 increases in England<sup>65</sup>. Half of all patients undergoing ACLR will have a poor long-term outcome  
4  
5 497 including persistent symptoms, impaired quality of life and accelerated structural decline<sup>5-7 66</sup>. This  
6  
7 498 underscores an urgent need for secondary prevention strategies to prevent symptomatic and  
8  
9  
10 499 structural OA decline – an epidemic of young people with old knees.  
11

12 500

14 501 The current RCT will be the first to evaluate the symptomatic and structural benefits of a  
15  
16 502 physiotherapist-supervised exercise-therapy and education intervention for young adults at high risk  
17  
18 503 of post-traumatic knee OA. This fully powered Phase III trial represents an important step towards  
19  
20 504 optimising management to achieve better outcomes and curtail the rapid trajectory of post-traumatic  
21  
22 505 knee OA following ACL injury and reconstruction.  
23

24 506

25 507

#### 26 508 **AUTHOR CONTRIBUTIONS**

27  
28  
29  
30 509 AGC, KMC, CJB, EMR, EO, SMM conceived the study and obtained funding. AGC, KMC and CJB designed  
31  
32 510 the study protocol with input from EMR, EO, SMM. SMM provided statistical expertise and will conduct  
33  
34 511 primary statistical analysis. EO, RBS and JL provided imaging expertise and will lead imaging analysis.  
35  
36 512 AGC drafted the manuscript with input from KMC, CJB, EMR, EO, SMM, RBS, JL, AMB, TJW, BEP, MAG,  
37  
38 513 JLC. All authors have read and approved the final manuscript.  
39  
40

41 514

#### 42 515 **FUNDING STATEMENT**

43  
44  
45  
46 516 This trial is supported by the National Health and Medical Research Council (NHMRC) of Australia (ID:  
47  
48 517 1158500). AGC is a recipient of an NHMRC Investigator Grant (GNT2008523), CJB was a recipient of a  
49  
50 518 Medical Research Future Fund Translating Research Into Practice (MRFF TRIP) Fellowship (ID:  
51  
52 519 1150439). The funders have no role in the study design and will not have any role in its execution,  
53  
54 520 data management, analysis and interpretation or on the decision to submit the results for  
55  
56 521 publication.  
57  
58  
59  
60

1  
2  
3 522  
45 523 **COMPETING INTERESTS STATEMENT**

7 524 CJB is the owner of a business providing physiotherapy treatment and exercise classes for some  
8  
9 participants enrolled in this study. CJB will have no role in the decision of which clinic participants  
10 525  
11 attend for study treatment. All other authors declare no competing interests.  
12 526  
13

14 527  
1516 528 **ACKNOWLEDGEMENTS**

17  
18  
19 529 We thank physiotherapists, Mick Hughes and Randall Cooper, for assistance in intervention design. We  
20  
21 530 thank the orthopaedic surgeons assisting with participant recruitment: Hayden Morris, Chris  
22  
23 531 Kondogiannis, Nathan White, Mark O'Sullivan, Matthew Evans, Ashley Carr, Justin Wong, Dirk van  
24  
25 532 Bavel, Matthew Alexander, Ben Campbell, Altay Altuntas, Simon Talbot, Raphael Hau, Luke Spencer,  
26  
27 533 David Mitchell. We thank the staff at each of the public hospitals involved in participant recruitment:  
28  
29 534 Lara Kimmel & Susan Liew (Alfred Hospital), Emily Cross & Andrew Bucknill (Royal Melbourne Hospital),  
30  
31 535 Jimmy Goulis & Juliette Gentle (Northern Hospital), Chris Cimoli, David Berlowitz & Andrew Hardidge  
32  
33 536 (Austin Hospital), Peter Choong (St Vincent's Hospital), Leanne Roddy & Raphael Hau (Box Hill  
34  
35 537 Hospital), Libby Spiers & Phong Tran (Footscray Hospital), Peter Schoch, Katelyn Bailey, Caitlin Knee &  
36  
37 538 Richard Page (Barwon Hospital), Leonie Lewis & David Mitchell (Ballarat Hospital). We thank the  
38  
39 539 physiotherapists involved in treating the participants at Complete Sports Care, Clifton Hill  
40  
41 540 Physiotherapy, Flex Out Physiotherapy, Lake Health Group, Melbourne Sports Physiotherapy, Mill Park  
42  
43 541 Physiotherapy, Symmetry Physiotherapy, Grand Slam Physiotherapy, Melbourne Sports Medicine  
44  
45 542 Centre, Southern Suburbs Physiotherapy Centre, Lifecare La Trobe.  
46  
47  
48  
49

50 543  
5152 544  
5354 545 **FIGURE LEGENDS**

55  
56  
57 546 **Figure 1.** Flow of participants through the study. MRI, magnetic resonance imaging; KOOS, Knee injury  
58  
59 547 and Osteoarthritis Outcome Score.  
60

1  
2  
3 548 **Figure 2.** Magnetic resonance imaging protocol. A) Sagittal fast spoiled gradient echo (FSPGR)  
4  
5 549 sequence; B) Sagittal, coronal and axial proton density weight far suppressed spin-echo sequence; and  
6  
7 550 C) Sagittal mulit-echo spin-echo sequence  
8  
9

10 551

11 552

12 553

13  
14 554 **SUPPLEMENTARY FILES**

15  
16  
17 555 **Supplementary File 1.** Overview of SUPER intervention exercise delivery according to Consensus on  
18  
19 556 Exercise Reporting Template (CERT) guidelines  
20  
21 557

22  
23 558 **Supplementary File 2.** Exercises and logbook for SUPER intervention  
24

25 559 **Supplementary File 3.** Exercises and logbook for minimal intervention control  
26

27 560 **Supplementary File 4.** Details of physical performance tests  
28

29 561 **Supplementary File 5.** Details of magnetic resonance imaging sequences acquired  
30

31 562 **Supplementary File 6.** Patient information and consent form  
32  
33

34 563

35  
36 564 **REFERENCES**

- 37  
38  
39 565 1. Griffin LY, Agel J, Albohm MJ, et al. Noncontact anterior cruciate ligament injuries: risk factors and  
40 566 prevention. *Journal of the American Academy of Orthopaedic Surgeons* 2000;8(3):141-50.  
41 567 2. Culvenor AG, Crossley KM. Accelerated return to sport after anterior cruciate ligament injury: a risk  
42 568 factor for early knee osteoarthritis? *British Journal of Sports Medicine* 2016;50:260-1.  
43 569 3. Ardern CL, Taylor NF, Feller JA, et al. Fifty-five per cent return to competitive sport following  
44 570 anterior cruciate ligament reconstruction surgery: an updated systematic review and  
45 571 metaanalysis including aspects of physical functioning and contextual factors. *British Journal*  
46 572 *of Sports Medicine* 2014;48:1543-52.  
47 573 4. Culvenor AG, Cook JL, Collins NJ, et al. Is patellofemoral joint osteoarthritis an under-recognised  
48 574 outcome of anterior cruciate ligament reconstruction? A narrative literature review. *British*  
49 575 *Journal of Sports Medicine* 2013;47(2):66-70.  
50 576 5. Culvenor AG, Lai CCH, Gabbe BJ, et al. Patellofemoral osteoarthritis is prevalent and associated  
51 577 with worse symptoms and function after hamstring tendon autograft ACL reconstruction.  
52 578 *British Journal of Sports Medicine* 2014;48(6):435-39. doi: 10.1136/bjsports-2013-092975  
53 579 6. Filbay SR, Culvenor AG, Ackerman IN, et al. Quality of life in anterior cruciate ligament-deficient  
54 580 individuals: a systematic review and meta-anaylsis. *British Journal of Sports Medicine*  
55 581 2015;49:1033-41.  
56 582 7. Lohmander LS, Englund PM, Dahl LL, et al. The long-term consequence of anterior cruciate  
57 583 ligament and meniscus injuries. *American Journal of Sports Medicine* 2007;35(10):1756-69.  
58  
59  
60

- 1  
2  
3 584 8. Patterson BE, Culvenor AG, Barton CJ, et al. Patient-reported outcomes one to five years after  
4 585 anterior cruciate ligament reconstruction: the effect of combined injury and associations  
5 586 with osteoarthritis features defined on magnetic resonance imaging. *Arthritis Care & Research*  
6 587 2020;72:412-22.
- 7  
8 588 9. Lane NE, Brandt KD, Hawker G, et al. OARSI-FDA initiative: defining the disease state of  
9 589 osteoarthritis. *Osteoarthritis and Cartilage* 2011;19:478-82.
- 10 590 10. Emery CA, Roos EM, Verhagen E, et al. OARSI Clinical Trials Recommendations: design and  
11 591 conduct of clinical trials for primary prevention of osteoarthritis by joint injury prevention in  
12 592 sport and recreation. *Osteoarthritis and Cartilage* 2015;23:815-25.
- 13 593 11. Juhl CB, Christensen R, Roos EM, et al. Impact of exercise type and dose on pain and disability in  
14 594 knee osteoarthritis: a systematic review and meta-regression analysis of randomized  
15 595 controlled trials. *Arthritis & Rheumatology* 2014;66(3):622-36.
- 16 596 12. Roos EM, Arden NK. Strategies for the prevention of knee osteoarthritis. *Nature Reviews*  
17 597 *Rheumatology* 2016;12:92-101.
- 18 598 13. Pollard TCB, Gwilym SE, Carr AJ. The assessment of early osteoarthritis. *Journal of Bone and Joint*  
19 599 *Surgery* 2008;90B:411-21.
- 20 600 14. Culvenor AG, Ruhdorfer A, Juhl CB, et al. Knee extensor strength and risk of structural,  
21 601 symptomatic and functional decline in knee osteoarthritis: a systematic review and meta-  
22 602 analysis. *Arthritis Care & Research* 2017;69:649-58.
- 23 603 15. Roos EM, Dahlberg LE. Positive effects of moderate exercise on glycosaminoglycan content in  
24 604 knee cartilage: a four-month, randomized, controlled trial in patients at risk of osteoarthritis.  
25 605 *Arthritis & Rheumatism* 2005;52(11):3507-14.
- 26 606 16. Munukka M, Waller B, Rantalainen T, et al. Efficacy of progressive aquatic resistance training for  
27 607 tibiofemoral cartilage in postmenopausal women with mild knee osteoarthritis: a randomised  
28 608 controlled trial. *Osteoarthritis and Cartilage* 2016;24:1708-17.
- 29 609 17. Koli J, Multanen J, Kujala UM, et al. Effects of exercise on patellar cartilage in women with mild  
30 610 knee osteoarthritis. *Medicine and Science in Sports and Exercise* 2015;47(9):1767-74.
- 31 611 18. Group MK, Spindler KP, Huston LJ, et al. Ten-year outcomes and risk factors after anterior  
32 612 cruciate ligament reconstruction: A MOON longitudinal prospective cohort study. *American*  
33 613 *Journal of Sports Medicine* 2018;46:815-25.
- 34 614 19. Patterson BE, Culvenor AG, Barton CJ, et al. Poor functional performance 1 year after ACL  
35 615 reconstruction increases the risk of early osteoarthritis progression. *British Journal of Sports*  
36 616 *Medicine* 2020;54:549-55.
- 37 617 20. Wang Y, Teichtahl AJ, Abram F, et al. Knee pain as a predictor of structural progression over 4  
38 618 years: data from the Osteoarthritis Initiative, a prospective cohort study. *Arthritis Research*  
39 619 *and Therapy* 2018;20:250.
- 40 620 21. Patterson BE, Barton CJ, Culvenor AG, et al. Exercise-therapy and education for individuals one  
41 621 year after anterior cruciate ligament reconstruction: a pilot randomised controlled trial. *Bmc*  
42 622 *Musculoskeletal Disorders* 2021;22:64.
- 43 623 22. Chan AW, Tetzlaff JM, Gotzsche P, et al. SPIRIT 2013 explanation and elaboration: guidance for  
44 624 protocols of clinical trials. *BMJ* 2013;346:e7586.
- 45 625 23. Moher D, Hopewell S, Schulz KF, et al. CONSORT 2010 Explanation and Elaboration: updated  
46 626 guidelines for reporting parallel group randomised trials. *BMJ* 2010;340:c869.
- 47 627 24. Hoffmann TC, Glasziou PP, Boutron I, et al. Better reporting of interventions: template for  
48 628 intervention description and replication (TIDieR) checklist and guide. *BMJ* 2014;348:g1687.
- 49 629 25. Slade SC, Dionne CE, Underwood M, et al. Consensus on Exercise Reporting Template (CERT):  
50 630 Explanation and Elaboration Statement. *British Journal of Sports Medicine* 2016;50:1428-37.
- 51 631 26. Culvenor AG, Collins NJ, Guermazi A, et al. Early knee osteoarthritis is evident one year following  
52 632 anterior cruciate ligament reconstruction: A magnetic resonance imaging evaluation.  
53 633 *Arthritis & Rheumatology* 2015;67(4):946-55.

- 1  
2  
3 634 27. Culvenor AG, Collins NJ, Guermazi A, et al. Early patellofemoral osteoarthritis features one year  
4 635 after anterior cruciate ligament reconstruction: Symptoms and quality of life at three years.  
5 636 *Arthritis Care & Research* 2015;68:784-92.
- 6 637 28. Jarvinen TLN, Sihvonen R, Bhandari M, et al. Blinded interpretation of study results can feasibly  
7 638 and effectively diminish interpretation bias. *Journal of Clinical Epidemiology* 2014;67:769-72.
- 8 639 29. Andrade R, Pereira R, van Cingel R, et al. How should clinicians rehabilitate patients after ACL  
9 640 reconstruction? A systematic review of clinical practice guidelines (CPGs) with a focus on  
10 641 quality appraisal (AGREE II). *British Journal of Sports Medicine* 2020;54:512-9.
- 11 642 30. Skou ST, Roos EM. Good life with osteoArthritis in Denmark (GLA:D™): evidence-based education  
12 643 and supervised neuromuscular exercise delivered by certified physiotherapists nationwide.  
13 644 *Bmc Musculoskeletal Disorders* 2017;18:72.
- 14 645 31. Skou ST, Thorlund JB. A 12-week supervised exercise therapy program for young adults with a  
15 646 meniscal tear: Program development and feasibility study. *Journal of Bodywork and*  
16 647 *Movement Therapies* 2018;22:786-91.
- 17 648 32. American College of Sports Medicine position stand. Progression models in resistance training for  
18 649 healthy adults. *Medicine and Science in Sports and Exercise* 2009;41:687-708.
- 19 650 33. Whittaker JL, Roos EM. A pragmatic approach to prevent post-traumatic osteoarthritis after sport  
20 651 or exercise-related joint injury. *Best Practice & Research Clinical Rheumatology* 2019;33:158-  
21 652 71.
- 22 653 34. Harris PA, Taylor R, Minor BL, et al. The REDCap consortium: Building an international community  
23 654 of software platform partners. *Journal of Biomedical Informatics* 2019;95:103208.
- 24 655 35. Gudbergson H, Bartels EM, Krusager P, et al. Test-retest of computerized health status  
25 656 questionnaires frequently used in the monitoring of knee osteoarthritis: a randomized  
26 657 crossover trial. *BMC Musculoskeletal Disorders* 2011;12(1):190.
- 27 658 36. Davis TC, Crouch MA, Long SW, et al. Rapid assessment of literacy levels of adult primary care  
28 659 patients. *Family Medicine* 1991;23:433-5.
- 29 660 37. Frobell R, Roos E, Roos H, et al. A randomized trial of treatment for acute anterior cruciate  
30 661 ligament tears. *New England Journal of Medicine* 2010;363:331-42.
- 31 662 38. Roos EM, Roos HP, Lohmander LS, et al. Knee Injury and Osteoarthritis Outcome Score (KOOS).  
32 663 Development of a self-administered outcome measure. *Journal of Orthopaedic & Sports*  
33 664 *Physical Therapy* 1998;78:88-96.
- 34 665 39. Collins NJ, Prinsen CAC, Christensen R, et al. Knee Injury and Osteoarthritis Outcome Score  
35 666 (KOOS): systematic review and meta-analysis of measurement properties *Osteoarthritis and*  
36 667 *Cartilage* 2016;24:1317-29.
- 37 668 40. Drouin JM, Valovich-McLeod TC, Schiltz SJ, et al. Reliability and validity of the Biodex system 3 pro  
38 669 isokinetic dynamometer velocity, torque and position measurements. *European Journal of*  
39 670 *Applied Physiology* 2004;91:22-9.
- 40 671 41. Culvenor AG, Collins NJ, Vicenzino B, et al. Predictors and effects of patellofemoral pain following  
41 672 hamstring-tendon ACL reconstruction. *Journal of Science and Medicine in Sport*  
42 673 2015;19(7):518-23.
- 43 674 42. Patterson BE, Crossley KM, Perraton LG, et al. Limb symmetry index on a functional test battery  
44 675 improves between one and five years after anterior cruciate ligament reconstruction,  
45 676 primarily due to worsening contralateral limb function. *Physical Therapy in Sport* 2020;44:67-  
46 677 74.
- 47 678 43. Gustavsson A, Neeter C, Thomee P, et al. A test battery for evaluating hop performance in  
48 679 patients with an ACL injury and patients who have undergone ACL reconstruction. *Knee*  
49 680 *Surgery, Sports Traumatology, Arthroscopy* 2006;14(8):778-88.
- 50 681 44. Ingelsrud LH, Granan LP, Terwee CB, et al. Proportion of patients reporting acceptable symptoms  
51 682 or treatment failure and their associated KOOS values at 6 and 24 months after anterior  
52 683 cruciate ligament reconstruction: a study from the Norwegian Knee Ligament Registry.  
53 684 *American Journal of Sports Medicine* 2015;43:1902-7.
- 54  
55  
56  
57  
58  
59  
60

- 1  
2  
3 685 45. Oei EHG, van Tiel J, Robinson WH, et al. Quantitative radiologic imaging techniques for articular  
4 686 cartilage composition: toward early diagnosis and development of disease-modifying  
5 687 therapeutics for osteoarthritis. *Arthritis Care & Research* 2014;66:1129-41.  
6 688 46. Culvenor AG, Eckstein F, Wirth W, et al. Loss of patellofemoral cartilage thickness over 5 years  
7 689 following ACL injury depends on the initial treatment strategy: results from the KANON trial.  
8 690 *British Journal of Sports Medicine* 2019;53:1168-73.  
9 691 47. Hunter DJ, Guermazi A, Lo GH, et al. Evolution of semi-quantitative whole joint assessment of  
10 692 knee OA: MOAKS (MRI Osteoarthritis Knee Score). *Osteoarthritis and Cartilage* 2011;19:990-  
11 693 1002.  
12 694 48. Roemer FW, Frobell R, Lohmander LS, et al. Anterior Cruciate Ligament OsteoArthritis Score  
13 695 (ACLOAS): Longitudinal MRI-based whole joint assessment of anterior cruciate ligament  
14 696 injury. *Osteoarthritis and Cartilage* 2014;22(5):668-82.  
15 697 49. Runhaar J, Schiphof D, Van Meer BL, et al. How to define subregional osteoarthritis progression  
16 698 using semi-quantitative MRI Osteoarthritis Knee Score (MOAKS). *Osteoarthritis and Cartilage*  
17 699 2014;22:1533-6.  
20 700 50. Liao TC, Jergas H, Tibrewala R, et al. Longitudinal analysis of the contribution of 3D patella and  
21 701 trochlear bone shape on patellofemoral joint osteoarthritic features. *Journal of Orthopaedic*  
22 702 *Research* 2021;39:506-15.  
23 703 51. Woby SR, Roach NK, Urmston M, et al. Psychometric properties of the TSK-11: a shortened  
24 704 version of the Tampa scale for kinesiophobia. *Pain* 2005;117(1-2):137-44.  
25 705 52. Briggs KK, Lysholm J, Tegner Y, et al. The reliability, validity, and responsiveness of the Lysholm  
26 706 Score and Tegner Activity Scale for anterior cruciate ligament injuries of the knee. *American*  
27 707 *Journal of Sports Medicine* 2009;37(5):890-97.  
28 708 53. Mohtadi N. Development and validation of the quality of life outcome measure (questionnaire)  
29 709 for chronic anterior cruciate ligament deficiency. *American Journal of Sports Medicine*  
30 710 1998;26(3):350-59.  
31 711 54. Rabin R, de Charro F. EQ-5D: a measure of health status from the EuroQol Group. *Annals of*  
32 712 *Medicine* 2001;33(5):337-43.  
33 713 55. Fransen M, Edmonds J. Reliability and validity of the EuroQol in patients with osteoarthritis of the  
34 714 knee. *Rheumatology* 1999;38:807-13.  
35 715 56. Lafave MR, Hiemstra L, Kerslake S, et al. Validity, reliability, and responsiveness of the anterior  
36 716 cruciate ligament quality of life measure: a continuation of its overall validation. *Clinical*  
37 717 *Journal of Sport Medicine* 2017;27(1):57-63.  
38 718 57. Roos EM, Boyle E, Frobell R, et al. It is good to feel better, but better to feel good: whether a  
39 719 patient finds treatment 'successful' or not depends on the questions researchers ask. *British*  
40 720 *Journal of Sports Medicine* 2019;53:1474-8.  
41 721 58. Risberg MA, Oiestad BE, Gunderson R, et al. Changes in knee osteoarthritis, symptoms, and  
42 722 function after anterior cruciate ligament reconstruction: A 20-year prospective follow-up  
43 723 study. *American Journal of Sports Medicine* 2016;44(5):1215-24.  
44 724 59. van Roijen L, Essink-Bot ML, Koopmanschap MA, et al. Labor and health status in economic  
45 725 evaluation of health care: The health and labor questionnaire. *International Journal of*  
46 726 *Technology Assessment in Health Care* 1996;12:405-15.  
47 727 60. Lerner D, Amick BC, Rogers WH, et al. The work limitations questionnaire. *Medical Care*  
48 728 2001;39:72-85.  
49 729 61. Ritchie J, Spencer L. Qualitative data analysis for applied policy research. In: Burgess R, ed.  
50 730 *Analyzing qualitative data*. London: Routledge 1994.  
51 731 62. Filbay SR, Crossley KM, Ackerman IN. Activity preferences, lifestyle modifications and re-injury  
52 732 fears influence longer-term quality of life in people with knee symptoms following anterior  
53 733 cruciate ligament reconstruction: a qualitative study. *Journal of Physiotherapy* 2016;62:103-  
54 734 10.  
55 735 63. Zbrojkiewicz D, Vertullo C, Grayson JE. Increasing rates of anterior cruciate ligament  
56 736 reconstruction in young Australians, 2000-2015. *Medical Journal of Australia* 2018;8:354-8.

- 1  
2  
3 737 64. Mall NA, Chalmers PN, Moric M, et al. Incidence and trends of anterior cruciate ligament  
4 738 reconstruction in the United States. *American Journal of Sports Medicine* 2014;42(10):2363-  
5 739 70.  
6 740 65. Abram SGF, Price AJ, Judge A, et al. Anterior cruciate ligament (ACL) reconstruction and meniscal  
7 741 repair rates have both increased in the past 20 years in England: hospital statistics from 1997  
8 742 to 2017. *British Journal of Sports Medicine* 2019;epub ahead of print  
9 743 66. Culvenor AG, Oiestad BE, Hart HF, et al. Prevalence of knee osteoarthritis features on magnetic  
10 744 resonance imaging in asymptomatic uninjured adults: a systematic review and metaanalysis.  
11 745 *British Journal of Sports Medicine* 2019;53:1268-78.  
12  
13

14 746  
15  
16  
17  
18  
19  
20  
21  
22  
23  
24  
25  
26  
27  
28  
29  
30  
31  
32  
33  
34  
35  
36  
37  
38  
39  
40  
41  
42  
43  
44  
45  
46  
47  
48  
49  
50  
51  
52  
53  
54  
55  
56  
57  
58  
59  
60

For peer review only

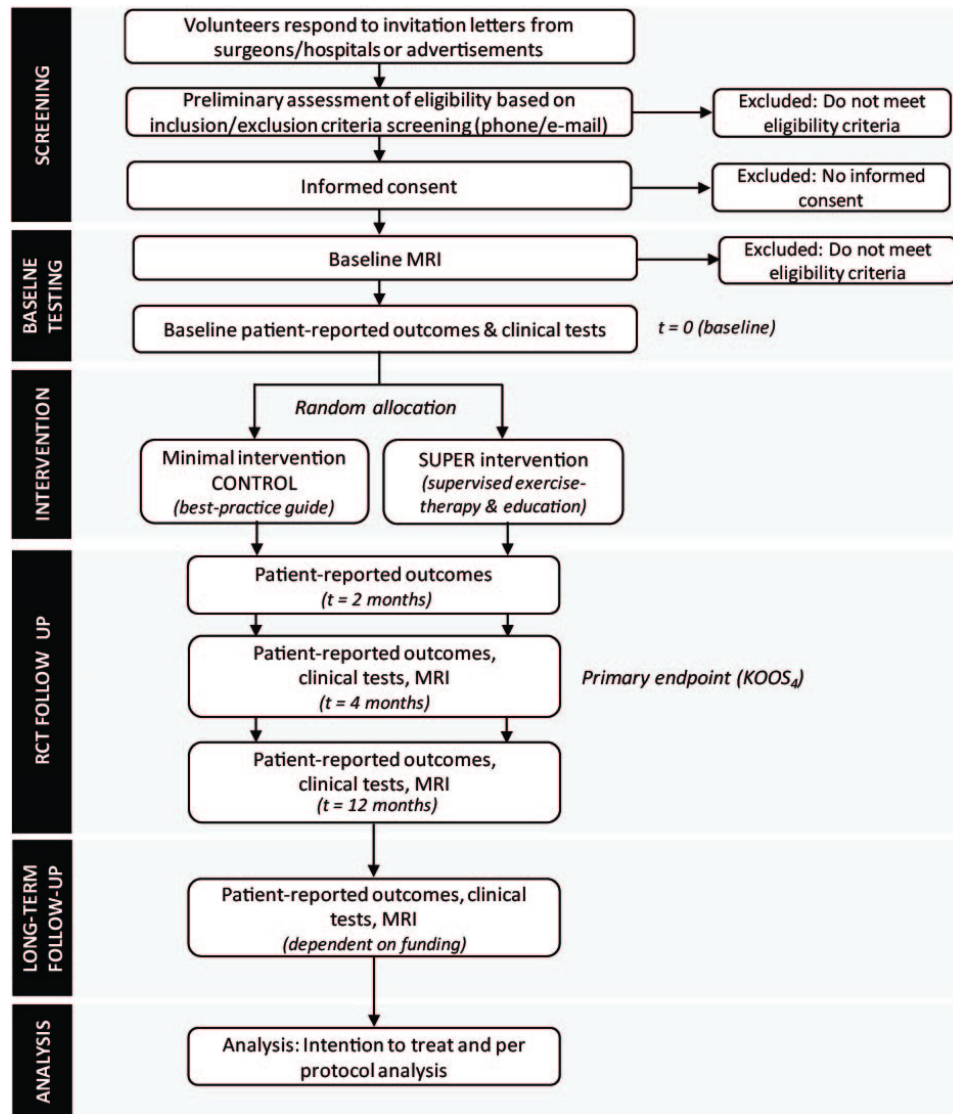

Figure 1. Flow of participants through the study. MRI, magnetic resonance imaging; KOOS, Knee injury and Osteoarthritis Outcome Score.

165x184mm (150 x 150 DPI)



1  
2  
3  
4  
5  
6  
7  
8  
9  
10  
11  
12  
13  
14  
15  
16  
17  
18  
19  
20  
21  
22  
23  
24  
25  
26  
27  
28  
29  
30  
31  
32  
33  
34  
35  
36  
37  
38  
39  
40  
41  
42  
43  
44  
45  
46  
47  
48  
49  
50  
51  
52  
53  
54  
55  
56  
57  
58  
59  
60

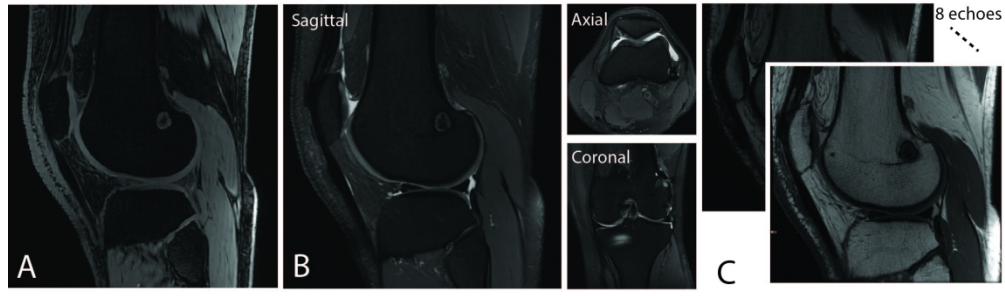

Figure 2. Magnetic resonance imaging protocol. A) Sagittal fast spoiled gradient echo (FSPGR) sequence; B) Sagittal, coronal and axial proton density weight far suppressed spin-echo sequence; and C) Sagittal multi-echo spin-echo sequence

407x156mm (150 x 150 DPI)

**Supplementary File 1.** Overview of SUPER intervention exercise delivery according to Consensus on Exercise Reporting Template (CERT) guidelines

| Section/Topic              | Checklist item                                                                          | SUPER Exercise Intervention Description                                                                                                                                                                                                                                                                                                                                                                                                                                                                                                                    |
|----------------------------|-----------------------------------------------------------------------------------------|------------------------------------------------------------------------------------------------------------------------------------------------------------------------------------------------------------------------------------------------------------------------------------------------------------------------------------------------------------------------------------------------------------------------------------------------------------------------------------------------------------------------------------------------------------|
| <b>WHAT:<br/>materials</b> | 1. Detailed description of the type of exercise equipment                               | <p>Various weighted equipment (e.g., dumbbells, barbells, resistance band, pin-loaded leg press, leg extension, hamstring curl machine) will be used. Participants will be provided with equipment (e.g., resistance band, 20kg adjustable dumbbells) to complete exercises at home.</p> <p>Details of equipment used are in Supplementary File 2.</p>                                                                                                                                                                                                     |
| <b>WHO:<br/>provider</b>   | 2. Detailed description of the qualifications, expertise and/or training                | <p>Approximately 30 registered physiotherapists with <math>\geq 3</math> years musculoskeletal clinical experience and work in private clinics in metropolitan and regional Victoria. All SUPER physiotherapists will complete 3 hours of online webinars and participate in a 4-hour workshop (7 hours total) before study commencement. Refresher training will be completed as required. SUPER physiotherapists will be supported with regular (approximately bi-monthly) contact by a member of the research team.</p>                                 |
| <b>HOW:<br/>delivery</b>   | 3. Describe whether exercises are performed individually or in a group                  | <p><u>Phase 1:</u> Participants will perform a mix of supervised 1:1 and small group (<math>\leq 6</math> participants) exercise sessions based on individual preference, clinic availability, and clinical reasoning by the treating physiotherapist. Participants will complete additional unsupervised sessions at home/local fitness centre (gym).</p> <p><u>Phase 2:</u> All exercises will be completed individually unless <i>a priori</i> discharge criteria are not met, in which case one supervised exercise session per week may continue.</p> |
|                            | 4. Describe whether exercises are supervised or unsupervised and how they are delivered | <p><u>Phase 1:</u> Supervised by a physiotherapist 1-2 times per week <b>AND</b> unsupervised 1-2 times per week.</p> <p><u>Phase 2:</u> Unsupervised 2-3 times per week unless <i>a priori</i> discharge criteria are not met, in which one supervised session per week may continue.</p>                                                                                                                                                                                                                                                                 |

1  
2  
3  
4  
5  
6  
7  
8  
9  
10  
11  
12  
13  
14  
15  
16  
17  
18  
19  
20  
21  
22  
23  
24  
25  
26  
27  
28  
29  
30  
31  
32  
33  
34  
35  
36  
37  
38  
39  
40  
41  
42  
43  
44  
45  
46

5. Detailed description of how adherence to exercise is measured and reported

Phase 1: Physiotherapists will record attendance at supervised exercises sessions. During supervised exercises, participants and/or physiotherapists will record dosage completed for each exercise in a clinic logbook. Participants will record unsupervised exercises either through an online exercise diary, or paper-based exercise logbook. Participants will also report their exercise adherence fortnightly via an online questionnaire.

Phase 2: Participants will report their exercise adherence monthly via an online questionnaire and/or paper-based logbook.

The percentage of supervised (and unsupervised) exercise sessions completed will be reported.

6. Detailed description of motivation strategies

Phase 1: (i) Physiotherapists will be trained to use simple motivational interviewing techniques to support intervention adherence; (ii) Functional assessments will be completed in the clinic (hop tests, one leg rise) monthly; (iii) Participants will maintain exercise training logbooks at the clinic and at home; (iv) Participants will be contacted monthly by a member of the research team; (v) Exercise variations available to cater for individual needs and preferences; (vi) Participants will be provided an activity monitor (e.g., Garmin watch) and encouraged to track daily activity; (vii) Small group exercise training with other SUPER-Knee trial participants.

Phase 2: (i) Access to a local gym; (ii) Booster session with physiotherapist, including functional re-assessment at 8 and 11 months; (iii) Followed up regularly by a member of the research team; (iv) Exercise variations available; (vi) Participants will continue using an activity monitor (e.g., Garmin watch).

7a. Detailed description of the decision rule(s) for determining exercise progression

Exercises will be progressed based on: (i) perceived difficulty using rating of perceived exertion (RPE) (e.g., RPE  $\geq 7/10$ , 3 sets of 8-12 reps and one lighter week per month of 5/10 RPE to increase motivation and allow recovery periods), and (ii) minimal pain (e.g.,  $< 3/10$  on numerical pain scale).

7b. Detailed description of how the exercise program is progressed

Exercises will be progressed to match pre-defined RPE of each week by any of the following: i) increasing load used; ii) increasing exercise difficulty level; iii) changing exercise position (e.g.,

|    |                                                                               |                                                                                                                                                                                                                                                                                                                         |
|----|-------------------------------------------------------------------------------|-------------------------------------------------------------------------------------------------------------------------------------------------------------------------------------------------------------------------------------------------------------------------------------------------------------------------|
| 1  |                                                                               | lowering squat depth, increasing step height); or iv) changing speed of exercise. Progression principles are in line with American College of Sports Medicine muscle strengthening guidelines.                                                                                                                          |
| 2  |                                                                               |                                                                                                                                                                                                                                                                                                                         |
| 3  |                                                                               |                                                                                                                                                                                                                                                                                                                         |
| 4  |                                                                               |                                                                                                                                                                                                                                                                                                                         |
| 5  |                                                                               |                                                                                                                                                                                                                                                                                                                         |
| 6  | 8. Detailed description of each exercise to enable replication                | The priority exercises are: 1) Quadriceps, 2) Knee extension, 3) Plyometrics, 4) Balance & Agility, 5) Hamstrings. The additional exercises are: 6) Trunk/core, 7) Hip abduction, 8) Hip adduction, 9) Calf raises.                                                                                                     |
| 7  |                                                                               |                                                                                                                                                                                                                                                                                                                         |
| 8  |                                                                               |                                                                                                                                                                                                                                                                                                                         |
| 9  |                                                                               |                                                                                                                                                                                                                                                                                                                         |
| 10 |                                                                               | Exercise descriptions are available in Supplementary File 2.                                                                                                                                                                                                                                                            |
| 11 |                                                                               |                                                                                                                                                                                                                                                                                                                         |
| 12 | 9. Detailed description of any home program component                         | Home exercise variations for each of the priority and additional exercises can be found in Supplementary File 2.                                                                                                                                                                                                        |
| 13 |                                                                               |                                                                                                                                                                                                                                                                                                                         |
| 14 |                                                                               |                                                                                                                                                                                                                                                                                                                         |
| 15 |                                                                               |                                                                                                                                                                                                                                                                                                                         |
| 16 | 10. Describe whether there are any non-exercise components                    | Comprehensive education will be provided during the two dedicated physiotherapy 'education' consultations (Weeks 1 and 4, 30-60 minutes).                                                                                                                                                                               |
| 17 |                                                                               |                                                                                                                                                                                                                                                                                                                         |
| 18 |                                                                               |                                                                                                                                                                                                                                                                                                                         |
| 19 |                                                                               |                                                                                                                                                                                                                                                                                                                         |
| 20 |                                                                               | Session 1 topics will include: Function and actions of the knee and ACL, mechanisms of ACL injury, risk factors, what is osteoarthritis, role and evidence for physical activity and exercise, pain education, recovery, goal setting.                                                                                  |
| 21 |                                                                               |                                                                                                                                                                                                                                                                                                                         |
| 22 |                                                                               |                                                                                                                                                                                                                                                                                                                         |
| 23 |                                                                               |                                                                                                                                                                                                                                                                                                                         |
| 24 |                                                                               |                                                                                                                                                                                                                                                                                                                         |
| 25 |                                                                               | Session 2 topics will include: Returning to physical activity and sport, psychological factors, goal re-setting and long-term planning, weight control.                                                                                                                                                                 |
| 26 |                                                                               |                                                                                                                                                                                                                                                                                                                         |
| 27 |                                                                               |                                                                                                                                                                                                                                                                                                                         |
| 28 | 11. Describe the type and number of adverse events that occur during exercise | Exercise-specific adverse events are increases in pain, swelling, re-injury caused by the exercises resulting in the participant needing to cease the exercise session, or an inability to complete subsequent sessions. Physiotherapists will record exercise-specific adverse events in their clinic treatment notes. |
| 29 |                                                                               |                                                                                                                                                                                                                                                                                                                         |
| 30 |                                                                               |                                                                                                                                                                                                                                                                                                                         |
| 31 |                                                                               |                                                                                                                                                                                                                                                                                                                         |
| 32 |                                                                               |                                                                                                                                                                                                                                                                                                                         |
| 33 |                                                                               |                                                                                                                                                                                                                                                                                                                         |
| 34 |                                                                               | For any serious adverse events, physiotherapists will contact a member of the research team immediately for suspected ACL re-injuries for medical review and incident reporting.                                                                                                                                        |
| 35 |                                                                               |                                                                                                                                                                                                                                                                                                                         |
| 36 | <b>WHERE:</b>                                                                 |                                                                                                                                                                                                                                                                                                                         |
| 37 | <b>location</b>                                                               | <u>Phase 1:</u> Exercises will be performed individually or in small groups at physiotherapy clinics under the supervision of a trained SUPER-Knee physiotherapist, and independently at home/local gym.                                                                                                                |
| 38 | 12. Describe the setting in which the exercises are performed                 |                                                                                                                                                                                                                                                                                                                         |
| 39 |                                                                               |                                                                                                                                                                                                                                                                                                                         |
| 40 |                                                                               |                                                                                                                                                                                                                                                                                                                         |
| 41 |                                                                               |                                                                                                                                                                                                                                                                                                                         |
| 42 |                                                                               |                                                                                                                                                                                                                                                                                                                         |
| 43 |                                                                               |                                                                                                                                                                                                                                                                                                                         |
| 44 |                                                                               |                                                                                                                                                                                                                                                                                                                         |
| 45 |                                                                               |                                                                                                                                                                                                                                                                                                                         |
| 46 |                                                                               |                                                                                                                                                                                                                                                                                                                         |

Phase 2: Home/local gym, unless *a priori* discharge criteria are not met, in which case supervised exercise sessions at the physiotherapy clinic may continue.

**WHEN/HOW MUCH: dosage** 13. Detailed description of the exercise intervention including, but not limited to, number of exercise repetitions/sets/session duration, intervention/program duration etc.

The priority exercises are: 1) Quadriceps, 2) Knee extension, 3) Plyometrics, 4) Balance & Agility, 5) Hamstrings. The additional exercises are: 6) Trunk/core, 7) Hip abduction, 8) Hip adduction, 9) Calf raises. Exercise descriptions are available in print (Supplementary File 2). Strength exercises will be performed in 3 sets of 8-12 reps, while power exercises will be performed in 1-3 sets of 3-6 reps based on clinical reasoning by the treating physiotherapists. Plyometric exercises will be performed in 1-3 sets of 10 reps. Session duration will be 30-60 mins depending on participant/physiotherapist availability. The entire intervention lasts for 12 months.

**TAILORING: what, how** 14a. Describe whether the exercises are generic (one size fits all) or whether tailored to the individual

The standard exercise program will include the 5 priority exercises. The additional exercises are optional to cater for individual needs, preferences, including time commitments.

Each exercise has 3-6 levels of difficulty that include options to cater for exercise training environment. Participants, with their physiotherapist, can select the exercise under each group that most suits individual needs and preferences.

14b. Detailed description of how exercises are tailored to the individual

Exercise prescription is individualised and follows guidelines from the American College of Sports Medicine for developing muscle strength and power. Exercises will be individually tailored based on: baseline assessment and ongoing functional assessment, achieving intended RPE, exercise training environment and equipment availability, clinical reasoning (e.g., individual preferences and needs, pain).

15. Describe the decision rule for determining the starting level at which people commence an exercise program

All exercise sessions will start with a 5-minute warm up (3-4/10 RPE). Strength exercises will be performed at a moderate-hard intensity (suggested 5/10 RPE) in Week 1, using guidance from baseline assessment information (e.g., strength and functional test results) contained in the handover form to physiotherapists. They will then be progressed for all participants in week 2 based on criteria outlined in 7a.

|    |                                          |                                                                                                    |
|----|------------------------------------------|----------------------------------------------------------------------------------------------------|
| 1  |                                          |                                                                                                    |
| 2  |                                          |                                                                                                    |
| 3  | <b>HOW WELL:</b>                         |                                                                                                    |
| 4  | <b>planned,</b>                          |                                                                                                    |
| 5  | <b>actual</b>                            |                                                                                                    |
| 6  | 16a. Describe how adherence or           | All SUPER-Knee physiotherapists will complete 3 hours of online webinars, attend the face-to-      |
| 7  | fidelity to the exercise intervention is | face 4-hour training workshop and receive a detailed treatment manual describing all aspects of    |
| 8  | assessed/measured                        | the exercise (and education) intervention. After initiation of the trial, communication (e.g.,     |
| 9  |                                          | telephone, email) between a member of the research team and each physiotherapist will occur        |
| 10 |                                          | to discuss issues experienced in the clinic and issues resolved as appropriate. In person fidelity |
| 11 |                                          | checks will be performed by a member of the research team and refresher training will be           |
| 12 |                                          | completed annually.                                                                                |
| 13 | 16b. Describe the extent to which the    | This will be reported in the primary paper.                                                        |
| 14 | intervention was delivered as            |                                                                                                    |
| 15 | planned                                  |                                                                                                    |
| 16 |                                          |                                                                                                    |
| 17 |                                          |                                                                                                    |
| 18 |                                          |                                                                                                    |
| 19 |                                          |                                                                                                    |
| 20 |                                          |                                                                                                    |
| 21 |                                          |                                                                                                    |
| 22 |                                          |                                                                                                    |
| 23 |                                          |                                                                                                    |
| 24 |                                          |                                                                                                    |
| 25 |                                          |                                                                                                    |
| 26 |                                          |                                                                                                    |
| 27 |                                          |                                                                                                    |
| 28 |                                          |                                                                                                    |
| 29 |                                          |                                                                                                    |
| 30 |                                          |                                                                                                    |
| 31 |                                          |                                                                                                    |
| 32 |                                          |                                                                                                    |
| 33 |                                          |                                                                                                    |
| 34 |                                          |                                                                                                    |
| 35 |                                          |                                                                                                    |
| 36 |                                          |                                                                                                    |
| 37 |                                          |                                                                                                    |
| 38 |                                          |                                                                                                    |
| 39 |                                          |                                                                                                    |
| 40 |                                          |                                                                                                    |
| 41 |                                          |                                                                                                    |
| 42 |                                          |                                                                                                    |
| 43 |                                          |                                                                                                    |
| 44 |                                          |                                                                                                    |
| 45 |                                          |                                                                                                    |
| 46 |                                          |                                                                                                    |

1  
2  
3  
4  
5  
6  
7  
8  
9  
10  
11  
12  
13  
14  
15  
16  
17  
18  
19  
20  
21  
22  
23  
24  
25  
26  
27  
28  
29  
30  
31  
32  
33  
34  
35  
36  
37  
38  
39  
40  
41  
42  
43  
44  
45  
46  
47  
48  
49  
50  
51  
52  
53  
54  
55  
56  
57  
58  
59  
60

# SUPER knee

## OPTIMISING OUTCOMES FOLLOWING ANTERIOR CRUCIATE LIGAMENT RECONSTRUCTION

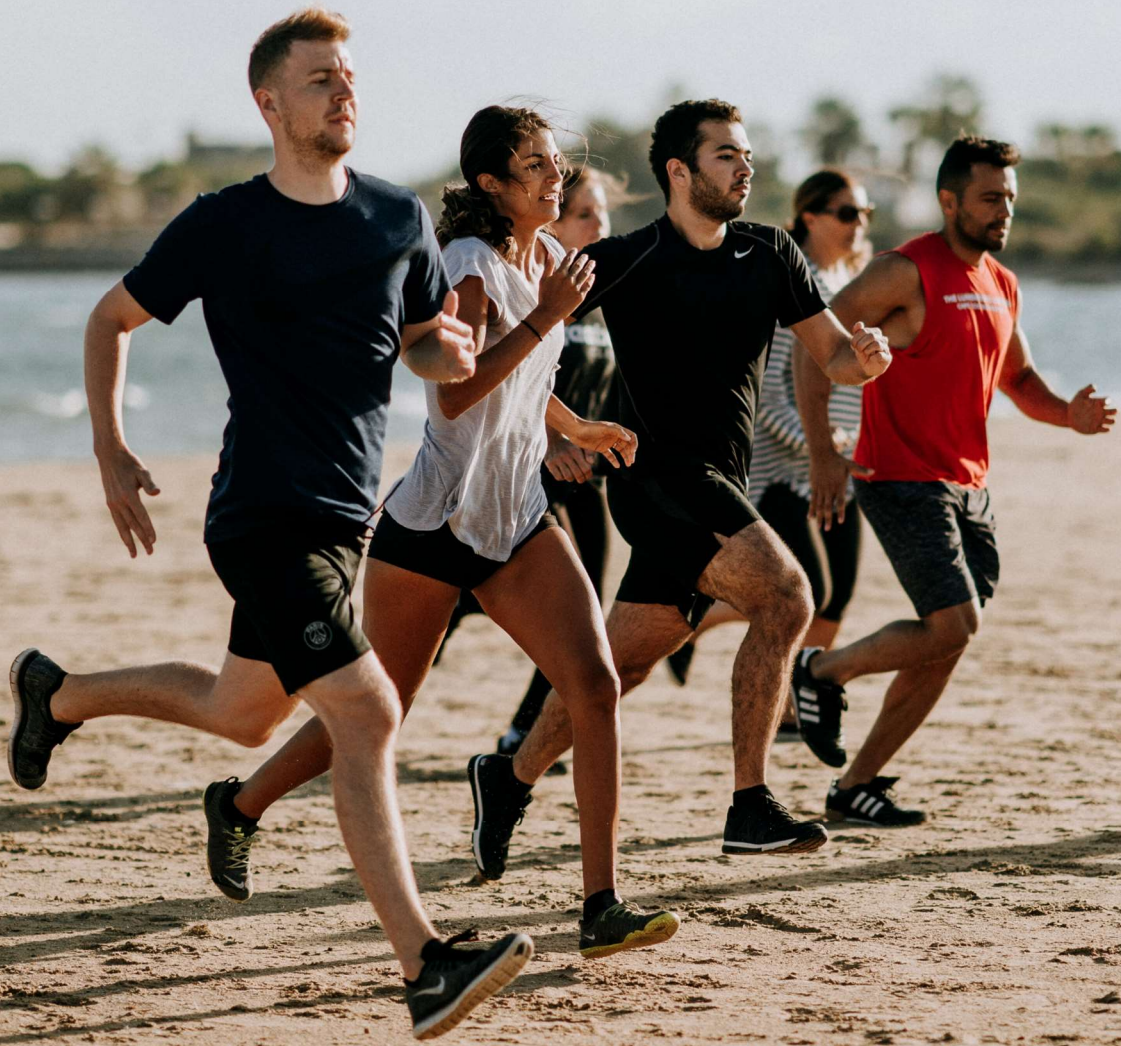

# PARTICIPANT HANDBOOK

For peer review only - <http://bmjopen.bmj.com/site/about/guidelines.xhtml>

1  
2  
3  
4  
5  
6  
7  
8  
9  
10  
11  
12  
13  
14  
15  
16  
17  
18  
19  
20  
21  
22  
23  
24  
25  
26  
27  
28  
29  
30  
31  
32  
33  
34  
35  
36  
37  
38  
39  
40  
41  
42  
43  
44  
45  
46  
47  
48  
49  
50  
51  
52  
53  
54  
55  
56  
57  
58  
59  
60

For peer review only

# PRIORITY EXERCISES



# EXERCISE 1. QUADRICEPS

## FOCUS

- Slow & controlled
- Knees, hips, ankles in line and hips level
- Aim for 2-3 sets of 8-12 repetitions

Feet shoulder width apart. Slowly squat until your buttocks lightly touch the chair/box. Return to standing.

### Level 1 – Double leg squat

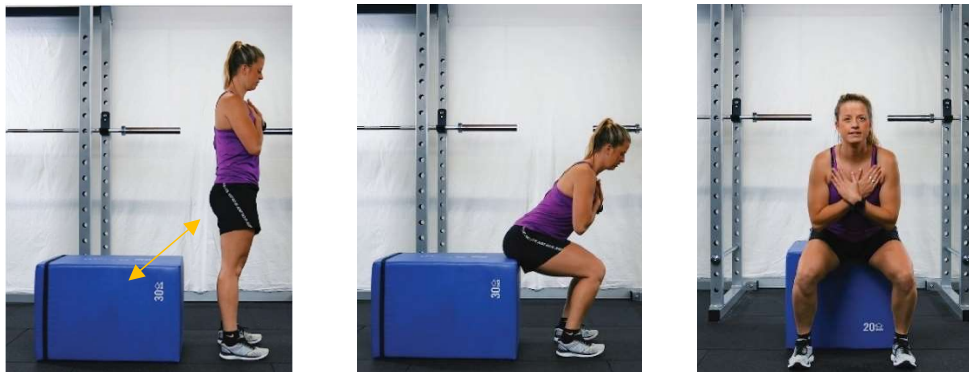

Standing on affected leg, slowly squat until your buttocks lightly touch the chair/box. Return to standing.

### Level 2 – Single leg squat

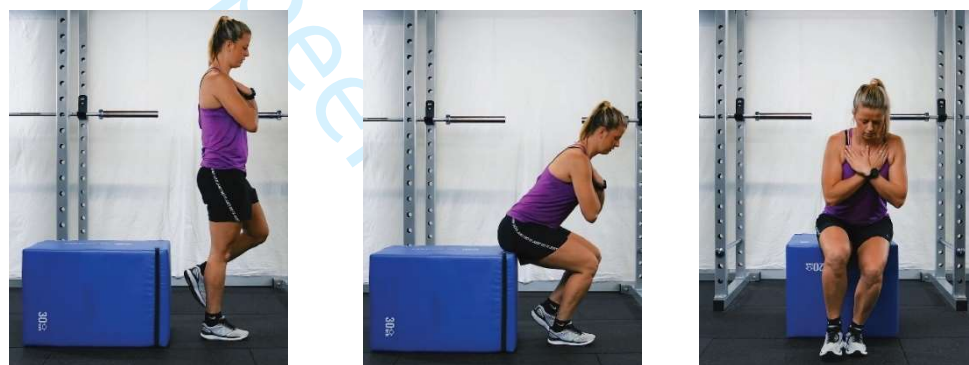

### Level 3 – Weighted single leg squat

Increase difficulty by holding weights (on your chest, by your side, or barbell on your shoulder blades).

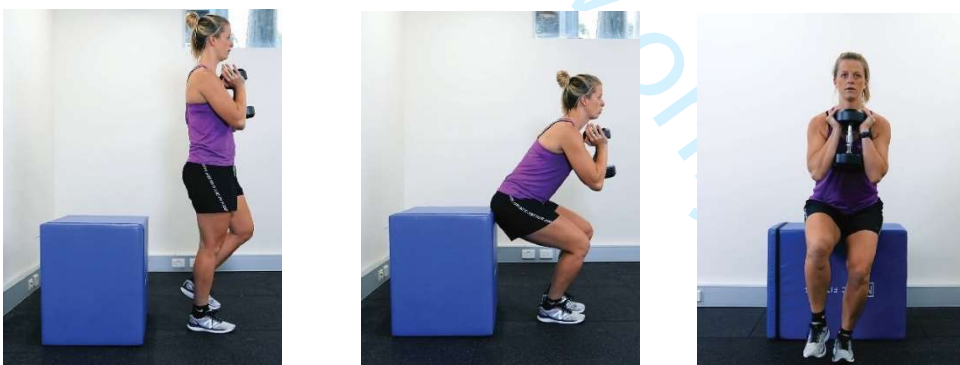

## POWER

- Combines strength and speed
- Vital for everyday activity
- Fast movements at lower weights
- Aim for 1-3 sets of 3-6 repetitions

### Level 4 – Power Squats

- POWER: complete squats (double- or single-leg as above) with weight at speed.
- Squat down and up as quickly as possible.
- Power can start from week 4 of program regardless of completing level 3 exercise.

**Exercise 1: QUADRICEPS**
**HOME/GYM RECORD**

\* Put a line through a session if exercise not completed in that session or missed a session

|                          |                  | Level (circle) | Aim RPE | Actual RPE | Kilos used | Number of sets | Number of reps |
|--------------------------|------------------|----------------|---------|------------|------------|----------------|----------------|
| Week 1 – date:<br>_____  | Home/gym session | 1 2 3 4        | 5/10    |            |            |                |                |
|                          | Extra session    | 1 2 3 4        | 5       |            |            |                |                |
| Week 2 – date:<br>_____  | Home/gym session | 1 2 3 4        | 7       |            |            |                |                |
|                          | Extra session    | 1 2 3 4        | 7       |            |            |                |                |
| Week 3 – date:<br>_____  | Home/gym session | 1 2 3 4        | 9       |            |            |                |                |
|                          | Extra session    | 1 2 3 4        | 9       |            |            |                |                |
| Week 4 – date:<br>_____  | Home/gym session | 1 2 3 4        | 5       |            |            |                |                |
|                          | Extra session    | 1 2 3 4        | 5       |            |            |                |                |
| Week 5 – date:<br>_____  | Home/gym session | 1 2 3 4        | 7       |            |            |                |                |
|                          | Extra session    | 1 2 3 4        | 7       |            |            |                |                |
| Week 6 – date:<br>_____  | Home/gym session | 1 2 3 4        | 7       |            |            |                |                |
|                          | Extra session    | 1 2 3 4        | 7       |            |            |                |                |
| Week 7 – date:<br>_____  | Home/gym session | 1 2 3 4        | 9       |            |            |                |                |
|                          | Extra session    | 1 2 3 4        | 9       |            |            |                |                |
| Week 8 – date:<br>_____  | Home/gym session | 1 2 3 4        | 5       |            |            |                |                |
|                          | Extra session    | 1 2 3 4        | 5       |            |            |                |                |
| Week 9 – date:<br>_____  | Home/gym session | 1 2 3 4        | 7       |            |            |                |                |
|                          | Extra session    | 1 2 3 4        | 7       |            |            |                |                |
| Week 10 – date:<br>_____ | Home/gym session | 1 2 3 4        | 7       |            |            |                |                |
|                          | Extra session    | 1 2 3 4        | 7       |            |            |                |                |
| Week 11 – date:<br>_____ | Home/gym session | 1 2 3 4        | 9       |            |            |                |                |
|                          | Extra session    | 1 2 3 4        | 9       |            |            |                |                |
| Week 12 – date:<br>_____ | Home/gym session | 1 2 3 4        | 5       |            |            |                |                |
|                          | Extra session    | 1 2 3 4        | 5       |            |            |                |                |
| Week 13 – date:<br>_____ | Home/gym session | 1 2 3 4        | 7       |            |            |                |                |
|                          | Extra session    | 1 2 3 4        | 7       |            |            |                |                |
| Week 14 – date:<br>_____ | Home/gym session | 1 2 3 4        | 7       |            |            |                |                |
|                          | Extra session    | 1 2 3 4        | 7       |            |            |                |                |
| Week 15 – date:<br>_____ | Home/gym session | 1 2 3 4        | 9       |            |            |                |                |
|                          | Extra session    | 1 2 3 4        | 9       |            |            |                |                |
| Week 16 – date:<br>_____ | Home/gym session | 1 2 3 4        | 9       |            |            |                |                |
|                          | Extra session    | 1 2 3 4        | 9       |            |            |                |                |

RPE= Rating of Perceived Exertion (0=rest, 10=working as hard as possible)

# EXERCISE 1b. QUADRICEPS VARIATIONS

(extra options usually after 4 weeks of the program but based on you and your physio's preferences)

## VARIETY

- Varying your workouts can help you push past a plateau
- Challenge your muscles, force them to adapt and strengthen
- Aim for 2-3 sets of 8-12 repetitions

Option 1: Weighted double leg squat

Use a barbell with weights resting on your shoulder blades. Slowly squat to ~90° knee bend. Return to standing.

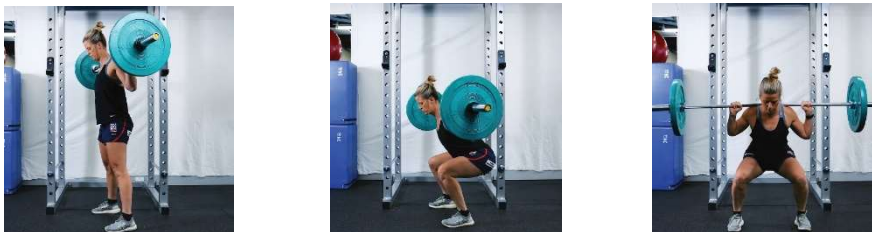

Option 2: Bulgarian split squat (hold weights for variability)

Place back foot on a step/chair. Slowly lunge down with most of your weight on your front leg. Keep your shin vertical and back upright. Hold weights to increase difficulty/variability.

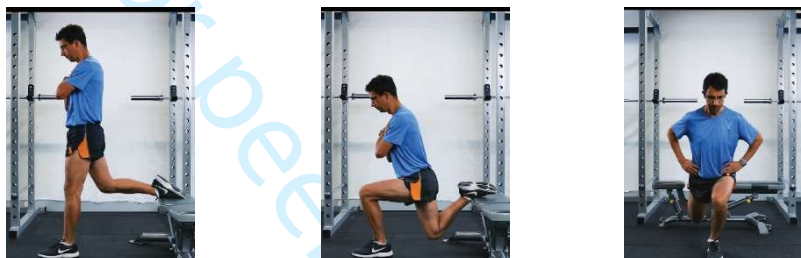

Option 3: Step ups/downs

Stand on the edge of a step, step down to lightly touch the floor behind you (or in front of you) and then straighten knee and return to standing. Increase difficulty by holding weights.

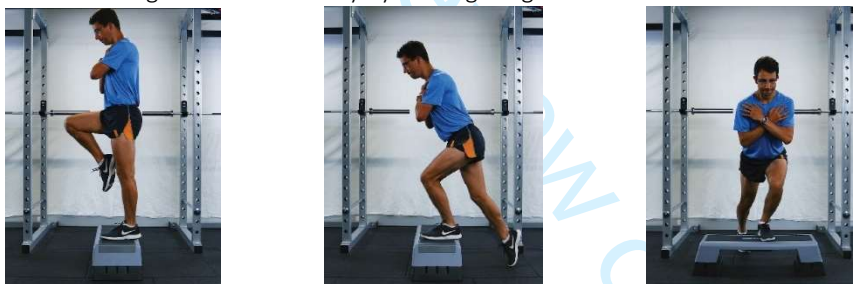

Option 4: Lunge

Step back and drop the back knee towards ground, then stand up. Increase difficulty by holding weights.

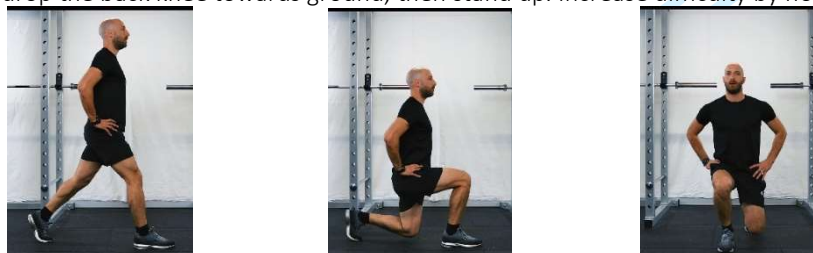

Option 5: Wall squat

Slide down until your knees are bent to 90°. Then return to the starting position. (Increase difficulty by holding weights or doing it on one leg.)

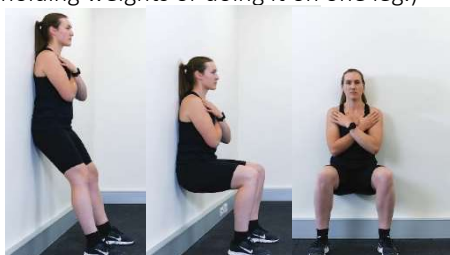

Option 6 – Single leg press

With your knee bent to 90°, push the footplate away by extending your knee (stop before locking it straight). Slowly control your knee to return to the starting position.

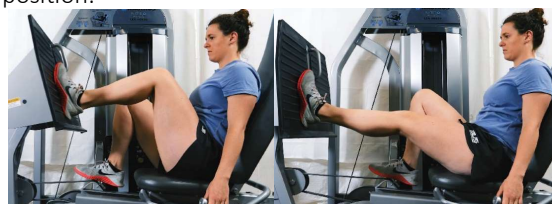

**Exercise 1b: QUADRICEPS VARIATIONS**
**HOME/GYM RECORD**

\* Integrate after 4 weeks of the program + based on you and your physio's preferences

|         |                  | Exercise (circle) | Aim RPE | Actual RPE | Kilos | Number of sets | Number of reps |
|---------|------------------|-------------------|---------|------------|-------|----------------|----------------|
| Week 1  | Home/gym session | 1 2 3 4 5 6       | 5/10    |            |       |                |                |
|         | Extra session    | 1 2 3 4 5 6       | 5       |            |       |                |                |
| Week 2  | Home/gym session | 1 2 3 4 5 6       | 7       |            |       |                |                |
|         | Extra session    | 1 2 3 4 5 6       | 7       |            |       |                |                |
| Week 3  | Home/gym session | 1 2 3 4 5 6       | 9       |            |       |                |                |
|         | Extra session    | 1 2 3 4 5 6       | 9       |            |       |                |                |
| Week 4  | Home/gym session | 1 2 3 4 5 6       | 5       |            |       |                |                |
|         | Extra session    | 1 2 3 4 5 6       | 5       |            |       |                |                |
| Week 5  | Home/gym session | 1 2 3 4 5 6       | 7       |            |       |                |                |
|         | Extra session    | 1 2 3 4 5 6       | 7       |            |       |                |                |
| Week 6  | Home/gym session | 1 2 3 4 5 6       | 7       |            |       |                |                |
|         | Extra session    | 1 2 3 4 5 6       | 7       |            |       |                |                |
| Week 7  | Home/gym session | 1 2 3 4 5 6       | 9       |            |       |                |                |
|         | Extra session    | 1 2 3 4 5 6       | 9       |            |       |                |                |
| Week 8  | Home/gym session | 1 2 3 4 5 6       | 5       |            |       |                |                |
|         | Extra session    | 1 2 3 4 5 6       | 5       |            |       |                |                |
| Week 9  | Home/gym session | 1 2 3 4 5 6       | 7       |            |       |                |                |
|         | Extra session    | 1 2 3 4 5 6       | 7       |            |       |                |                |
| Week 10 | Home/gym session | 1 2 3 4 5 6       | 7       |            |       |                |                |
|         | Extra session    | 1 2 3 4 5 6       | 7       |            |       |                |                |
| Week 11 | Home/gym session | 1 2 3 4 5 6       | 9       |            |       |                |                |
|         | Extra session    | 1 2 3 4 5 6       | 9       |            |       |                |                |
| Week 12 | Home/gym session | 1 2 3 4 5 6       | 5       |            |       |                |                |
|         | Extra session    | 1 2 3 4 5 6       | 5       |            |       |                |                |
| Week 13 | Home/gym session | 1 2 3 4 5 6       | 7       |            |       |                |                |
|         | Extra session    | 1 2 3 4 5 6       | 7       |            |       |                |                |
| Week 14 | Home/gym session | 1 2 3 4 5 6       | 7       |            |       |                |                |
|         | Extra session    | 1 2 3 4 5 6       | 7       |            |       |                |                |
| Week 15 | Home/gym session | 1 2 3 4 5 6       | 9       |            |       |                |                |
|         | Extra session    | 1 2 3 4 5 6       | 9       |            |       |                |                |
| Week 16 | Home/gym session | 1 2 3 4 5 6       | 9       |            |       |                |                |
|         | Extra session    | 1 2 3 4 5 6       | 9       |            |       |                |                |

RPE= Rating of Perceived Exertion (0=rest, 10=working as hard as possible)

**EXERCISE 2. KNEE EXTENSION**
**PAIN**

- Keep pain below 3/10 when exercising and pain should settle by the next day
- Pain is OK - you can be sore but safe as pain doesn't always equal damage
- **Aim for 2-3 sets of 8-12 repetitions**

- A. Knee extension machine: straighten knee against resistance, hold for 40-60 seconds then slowly return to the starting position.
- B. Resistance band: straighten knee against the resistance of resistance band, hold for 40-60 seconds then slowly return to the starting position.
- C. Cable machine: straighten knee against resistance, hold for 40-60 seconds then slowly return to the starting position.

*\*IF PAIN IS GREATER THAN 3/10 THEN YOU CAN TRY DIFFERENT KNEE ANGLES WITH GUIDANCE FROM YOUR PHYSIO*

## Level 1 – Knee extension holds

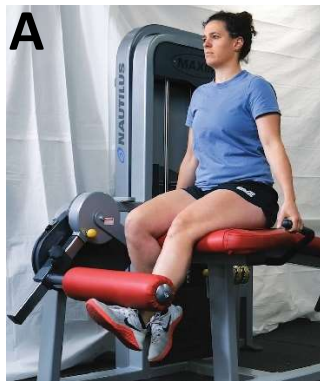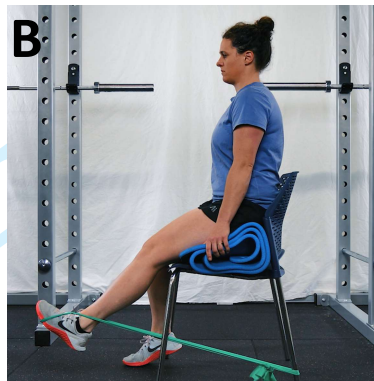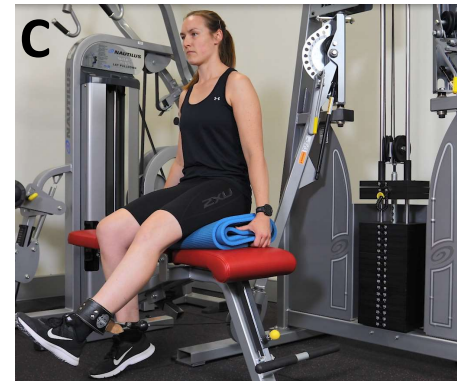

Fully straighten your knee slowly against resistance (using knee extension machine, resistance band or cable machine) and then slowly return to the starting position.

## Level 2 – Knee extension

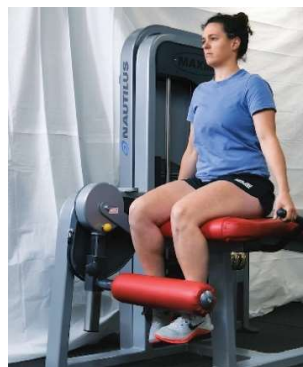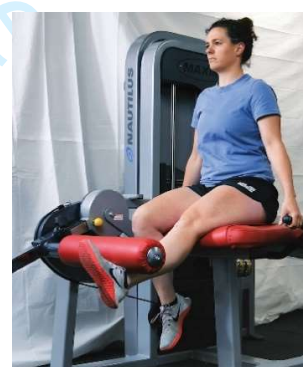
**POWER**

- Combines strength and speed
- Vital for everyday activity
- Fast movements at lower weights
- **Aim for 1-3 sets of 3-6 repetitions**

- Using either knee extension machine, resistance band or cable machine.
- Set the weight approximately 60-70% lighter than your last strength session.
- Complete same exercise as Level 2 but faster (aim for less than 1 sec to straighten the knee).
- Slowly bend the knee back to the starting position.
- Start power from week 4 of your program.

## Level 3 Power – Knee extension

**Exercise 2: KNEE EXTENSION**
**HOME/GYM RECORD**

|         |                  | Level (circle) | Aim RPE | Actual RPE | Kilos on affected leg | Number of sets | Number of reps |
|---------|------------------|----------------|---------|------------|-----------------------|----------------|----------------|
| Week 1  | Home/gym session | 1 2 3          | 5/10    |            |                       |                |                |
|         | Extra session    | 1 2 3          | 5       |            |                       |                |                |
| Week 2  | Home/gym session | 1 2 3          | 7       |            |                       |                |                |
|         | Extra session    | 1 2 3          | 7       |            |                       |                |                |
| Week 3  | Home/gym session | 1 2 3          | 9       |            |                       |                |                |
|         | Extra session    | 1 2 3          | 9       |            |                       |                |                |
| Week 4  | Home/gym session | 1 2 3          | 5       |            |                       |                |                |
|         | Extra session    | 1 2 3          | 5       |            |                       |                |                |
| Week 5  | Home/gym session | 1 2 3          | 7       |            |                       |                |                |
|         | Extra session    | 1 2 3          | 7       |            |                       |                |                |
| Week 6  | Home/gym session | 1 2 3          | 7       |            |                       |                |                |
|         | Extra session    | 1 2 3          | 7       |            |                       |                |                |
| Week 7  | Home/gym session | 1 2 3          | 9       |            |                       |                |                |
|         | Extra session    | 1 2 3          | 9       |            |                       |                |                |
| Week 8  | Home/gym session | 1 2 3          | 5       |            |                       |                |                |
|         | Extra session    | 1 2 3          | 5       |            |                       |                |                |
| Week 9  | Home/gym session | 1 2 3          | 7       |            |                       |                |                |
|         | Extra session    | 1 2 3          | 7       |            |                       |                |                |
| Week 10 | Home/gym session | 1 2 3          | 7       |            |                       |                |                |
|         | Extra session    | 1 2 3          | 7       |            |                       |                |                |
| Week 11 | Home/gym session | 1 2 3          | 9       |            |                       |                |                |
|         | Extra session    | 1 2 3          | 9       |            |                       |                |                |
| Week 12 | Home/gym session | 1 2 3          | 5       |            |                       |                |                |
|         | Extra session    | 1 2 3          | 5       |            |                       |                |                |
| Week 13 | Home/gym session | 1 2 3          | 7       |            |                       |                |                |
|         | Extra session    | 1 2 3          | 7       |            |                       |                |                |
| Week 14 | Home/gym session | 1 2 3          | 7       |            |                       |                |                |
|         | Extra session    | 1 2 3          | 7       |            |                       |                |                |
| Week 15 | Home/gym session | 1 2 3          | 9       |            |                       |                |                |
|         | Extra session    | 1 2 3          | 9       |            |                       |                |                |
| Week 16 | Home/gym session | 1 2 3          | 9       |            |                       |                |                |
|         | Extra session    | 1 2 3          | 9       |            |                       |                |                |

RPE= Rating of Perceived Exertion (0=rest, 10=working as hard as possible)

# EXERCISE 3. PLYOMETRIC POWER (JUMPING/HOPPING)

## FOCUS

- Soft landing bend through hips and knees to absorb load
- Alignment: knees, hips, ankles, torso in line, hips level
- **Begin with 10 repetitions and progress with guidance from your physio**

Level 1 – Double leg forward jump

Jump as high as possible landing softly bending at the hips and knees. Keep good alignment. Progress to jumping forwards as far as possible and jumping side to side.

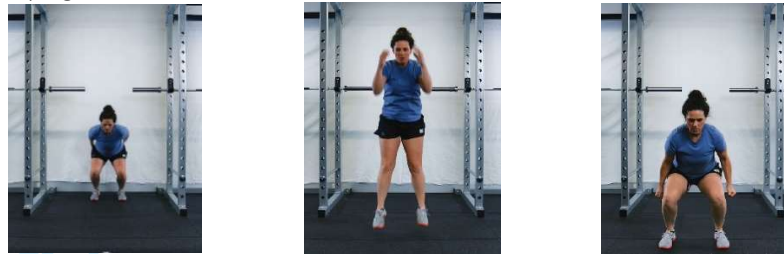

Level 2 – Single leg hop

Hop forward on one leg landing softly bending at your hips and knees. Keep good alignment. Increase distance/speed.

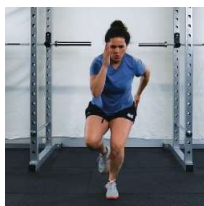

Level 3 – Single leg side hop

Hop side-to-side on one leg landing softly on the same leg bending at your hips and knees. Increase side-to-side distance.

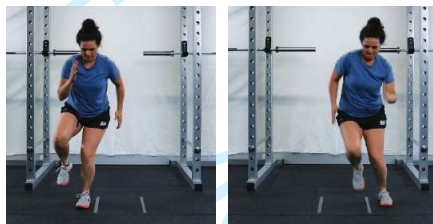

Level 4 – Drop jumps double leg

Standing on a box, jump down landing softly on both feet and immediately jump up as high as you can. Increase height of box or hold weights to make harder. The size of the box can range from small (20cm) step to large (40-50cm as pictured).

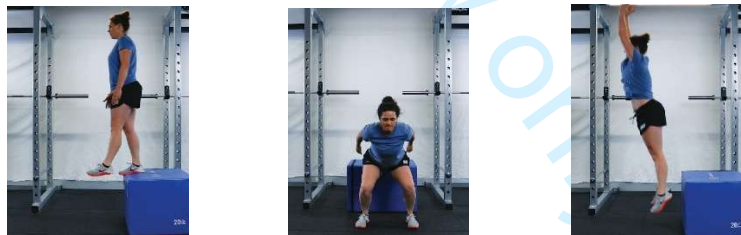

Level 5 – Drop jumps single leg

Stand on a box/step jump down and land softly on one leg and immediately hop up as high as you can

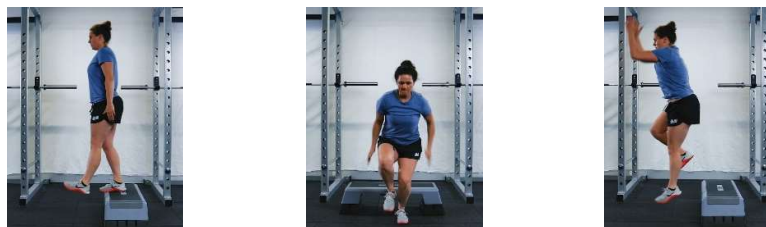

Level 6 – Sport specific

Discuss with your physio regarding sports-specific jumping exercises based on the sport or activities you wish to do.

- Examples:
- cutting upon hop landing
  - obstacles to hop over
  - replicate light sport physical contact
  - sport-specific skill performance
  - non-contact training drills (cutting around opponent)
  - multi-directional and unanticipated exercises
  - accelerate/decelerate

**Exercise 3: PLYOMETRICS (JUMPING/HOPPING)**

**HOME/GYM RECORD**

|         |                  | Level (circle) | Aim RPE | Actual RPE | Number of sets | Number of reps |
|---------|------------------|----------------|---------|------------|----------------|----------------|
| Week 1  | Home/gym session | 1 2 3 4 5 6    | 5/10    |            |                |                |
|         | Extra session    | 1 2 3 4 5 6    | 5       |            |                |                |
| Week 2  | Home/gym session | 1 2 3 4 5 6    | 7       |            |                |                |
|         | Extra session    | 1 2 3 4 5 6    | 7       |            |                |                |
| Week 3  | Home/gym session | 1 2 3 4 5 6    | 9       |            |                |                |
|         | Extra session    | 1 2 3 4 5 6    | 9       |            |                |                |
| Week 4  | Home/gym session | 1 2 3 4 5 6    | 5       |            |                |                |
|         | Extra session    | 1 2 3 4 5 6    | 5       |            |                |                |
| Week 5  | Home/gym session | 1 2 3 4 5 6    | 7       |            |                |                |
|         | Extra session    | 1 2 3 4 5 6    | 7       |            |                |                |
| Week 6  | Home/gym session | 1 2 3 4 5 6    | 7       |            |                |                |
|         | Extra session    | 1 2 3 4 5 6    | 7       |            |                |                |
| Week 7  | Home/gym session | 1 2 3 4 5 6    | 9       |            |                |                |
|         | Extra session    | 1 2 3 4 5 6    | 9       |            |                |                |
| Week 8  | Home/gym session | 1 2 3 4 5 6    | 5       |            |                |                |
|         | Extra session    | 1 2 3 4 5 6    | 5       |            |                |                |
| Week 9  | Home/gym session | 1 2 3 4 5 6    | 7       |            |                |                |
|         | Extra session    | 1 2 3 4 5 6    | 7       |            |                |                |
| Week 10 | Home/gym session | 1 2 3 4 5 6    | 7       |            |                |                |
|         | Extra session    | 1 2 3 4 5 6    | 7       |            |                |                |
| Week 11 | Home/gym session | 1 2 3 4 5 6    | 9       |            |                |                |
|         | Extra session    | 1 2 3 4 5 6    | 9       |            |                |                |
| Week 12 | Home/gym session | 1 2 3 4 5 6    | 5       |            |                |                |
|         | Extra session    | 1 2 3 4 5 6    | 5       |            |                |                |
| Week 13 | Home/gym session | 1 2 3 4 5 6    | 7       |            |                |                |
|         | Extra session    | 1 2 3 4 5 6    | 7       |            |                |                |
| Week 14 | Home/gym session | 1 2 3 4 5 6    | 7       |            |                |                |
|         | Extra session    | 1 2 3 4 5 6    | 7       |            |                |                |
| Week 15 | Home/gym session | 1 2 3 4 5 6    | 9       |            |                |                |
|         | Extra session    | 1 2 3 4 5 6    | 9       |            |                |                |
| Week 16 | Home/gym session | 1 2 3 4 5 6    | 9       |            |                |                |
|         | Extra session    | 1 2 3 4 5 6    | 9       |            |                |                |

RPE= Rating of Perceived Exertion (0=rest, 10=working as hard as possible)



# EXERCISE 4. BALANCE/AGILITY

**FOCUS**

- Get low and balanced ready for change of direction
- Knees, hips, ankles in line and hips level

Level 1 – Arabesques

Standing on one leg (knee slightly bent), slowly bend forward from your hip, reaching out making a straight line from your foot to your hands. Hold 5 secs.

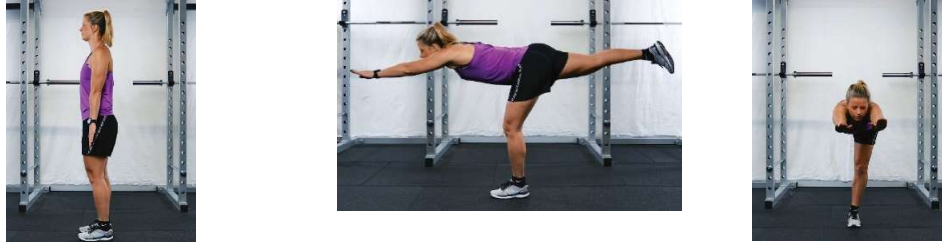

Level 2 – Clock Face

Standing on one leg (knee slightly bent) reach out to the imaginary numbers on a clock face (12, 3, 6, 9). Maintain balance without touching the ground. Return to upright position before reaching out again. Increase difficulty by reaching further (use a marker to guide). Begin with 3-5 repetitions in each direction.

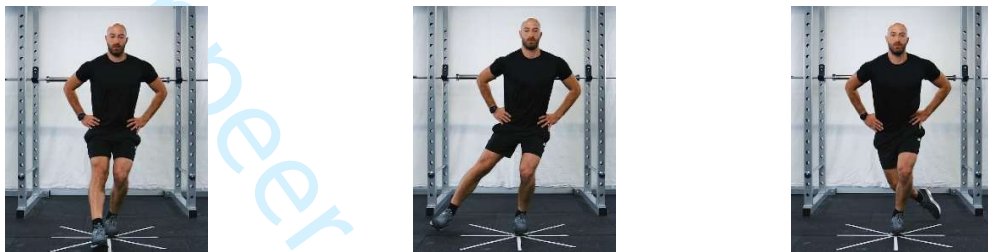

Level 3 – Clock face unstable surface

Repeat Level 2 exercise but this time stand on an unstable surface (e.g. wobble board, bosu ball, foam). Begin with 3-5 repetitions in each direction and progress with guidance from your physiotherapist.

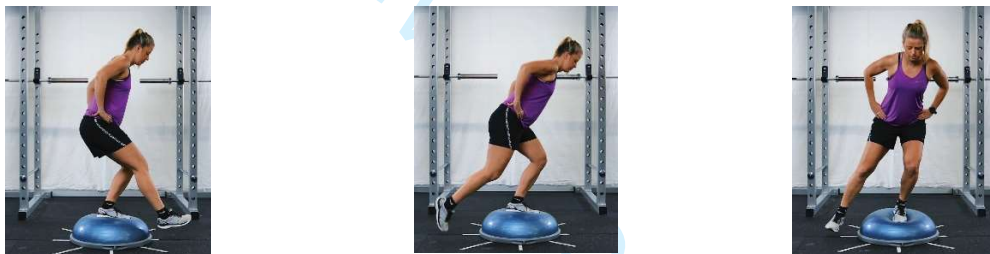

Level 4 – Clock face agility

Run towards the clockface, plant your foot in the centre of the clock and change direction to run along that line (start at 45°). Progress the exercise by increasing the angle - change of direction (90°, 135°, 180°). Begin with 3 repetitions in each direction and progress with guidance from your physiotherapist.

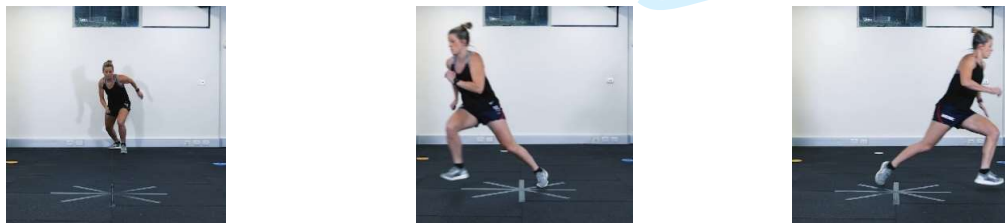

Level 5 – Multi-directional agility

In an area with at least 20m space, set up as detailed below in diagrams and complete 5 x each as fast as possible. Your physiotherapist will set this up. Should include forward, backward, and side running.

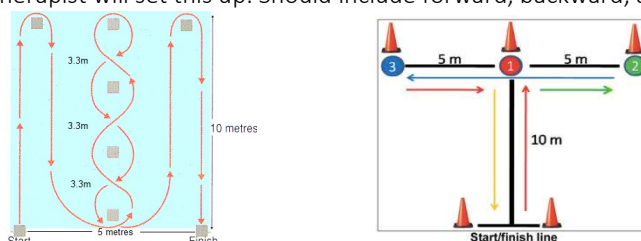

**Exercise 4: BALANCE/AGILITY**
**HOME/GYM RECORD**

|         |                  | Level (circle) | Aim RPE | Actual RPE | Number of sets | Number of reps |
|---------|------------------|----------------|---------|------------|----------------|----------------|
| Week 1  | Home/gym session | 1 2 3 4 5      | 5/10    |            |                |                |
|         | Extra session    | 1 2 3 4 5      | 5       |            |                |                |
| Week 2  | Home/gym session | 1 2 3 4 5      | 7       |            |                |                |
|         | Extra session    | 1 2 3 4 5      | 7       |            |                |                |
| Week 3  | Home/gym session | 1 2 3 4 5      | 9       |            |                |                |
|         | Extra session    | 1 2 3 4 5      | 9       |            |                |                |
| Week 4  | Home/gym session | 1 2 3 4 5      | 5       |            |                |                |
|         | Extra session    | 1 2 3 4 5      | 5       |            |                |                |
| Week 5  | Home/gym session | 1 2 3 4 5      | 7       |            |                |                |
|         | Extra session    | 1 2 3 4 5      | 7       |            |                |                |
| Week 6  | Home/gym session | 1 2 3 4 5      | 7       |            |                |                |
|         | Extra session    | 1 2 3 4 5      | 7       |            |                |                |
| Week 7  | Home/gym session | 1 2 3 4 5      | 9       |            |                |                |
|         | Extra session    | 1 2 3 4 5      | 9       |            |                |                |
| Week 8  | Home/gym session | 1 2 3 4 5      | 5       |            |                |                |
|         | Extra session    | 1 2 3 4 5      | 5       |            |                |                |
| Week 9  | Home/gym session | 1 2 3 4 5      | 7       |            |                |                |
|         | Extra session    | 1 2 3 4 5      | 7       |            |                |                |
| Week 10 | Home/gym session | 1 2 3 4 5      | 7       |            |                |                |
|         | Extra session    | 1 2 3 4 5      | 7       |            |                |                |
| Week 11 | Home/gym session | 1 2 3 4 5      | 9       |            |                |                |
|         | Extra session    | 1 2 3 4 5      | 9       |            |                |                |
| Week 12 | Home/gym session | 1 2 3 4 5      | 5       |            |                |                |
|         | Extra session    | 1 2 3 4 5      | 5       |            |                |                |
| Week 13 | Home/gym session | 1 2 3 4 5      | 7       |            |                |                |
|         | Extra session    | 1 2 3 4 5      | 7       |            |                |                |
| Week 14 | Home/gym session | 1 2 3 4 5      | 7       |            |                |                |
|         | Extra session    | 1 2 3 4 5      | 7       |            |                |                |
| Week 15 | Home/gym session | 1 2 3 4 5      | 9       |            |                |                |
|         | Extra session    | 1 2 3 4 5      | 9       |            |                |                |
| Week 16 | Home/gym session | 1 2 3 4 5      | 9       |            |                |                |
|         | Extra session    | 1 2 3 4 5      | 9       |            |                |                |

RPE= Rating of Perceived Exertion (0=rest, 10=working as hard as possible)

## EXERCISE 5. HAMSTRINGS

### FOCUS

- Strength in the hamstrings is vital to support overall knee control
- Complete sets of 2-3 and 8-12 repetitions (unless otherwise stated)

#### Level 1 – Double leg elevated bridge

Squeeze buttock muscles (glutes) to lift into the bridge position. Hold for 2 secs and slowly lower back to the ground.

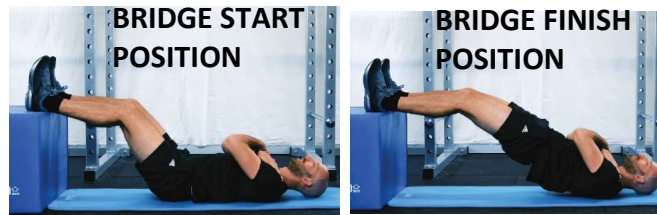

#### Level 2 – Single leg elevated bridge

Use one leg, squeeze buttocks and lift up into the bridge position. Hold for 2 secs and slowly lower back to the ground.

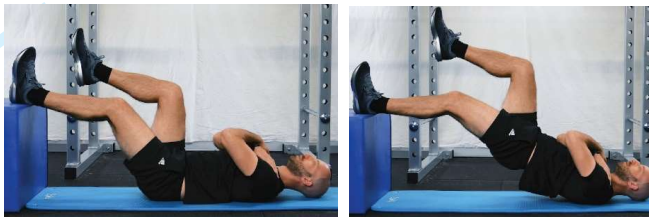

#### Level 3 – Single leg hamstring curl

Bend your knee pulling the resistance bar/band as far as you can to your hips, slowly return to the starting position. Increase difficulty by increasing weight on machine or tension in the resistance band (shorter/change band colour).

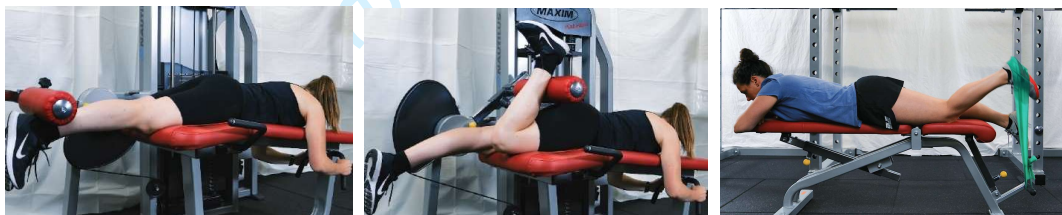

#### Level 4 – Hamstring curl swiss ball

Heels on swiss ball. Lift hips off floor. Roll swiss ball towards and away by bending knees. Progress using only one leg.

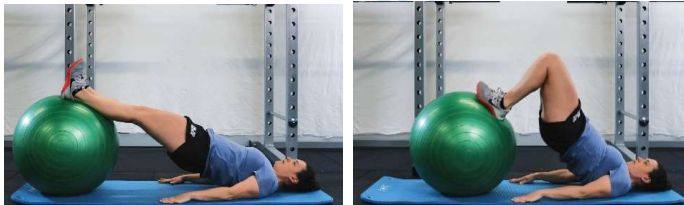

#### Level 5 – Nordic curl

Kneeling with object/partner keeping heels on ground. Keeping your back straight, lower your chest forwards until you can't hold yourself up, use your hands to break your fall. Return to starting position with your hands (not leg muscles!). Begin with 5 repetitions, 2 sets and progress with guidance from your physiotherapist.

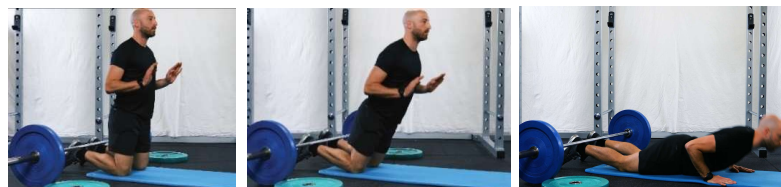

#### Level 6 – Power elevated bridge

### POWER

- Combines strength and speed
- Vital for everyday activity
- Fast movements at lower weights
- Aim for 1-3 sets of 3-6 repetitions

- Level 1, 2 or 3 exercise with aim for 1 sec to bend the knee or lift the pelvis and slowly return.
- If using hamstring curl machine set weight approx. 60-70% lighter than your last strength session.
- Start power from week 4 of program.

### Exercise 5: HAMSTRINGS

### HOME/GYM RECORD

|         |                  | Level (circle) | Aim RPE | Actual RPE | Kilos on affected leg | Number of sets | Number of reps |
|---------|------------------|----------------|---------|------------|-----------------------|----------------|----------------|
| Week 1  | Home/gym session | 1 2 3 4 5 6    | 5/10    |            |                       |                |                |
|         | Extra session    | 1 2 3 4 5 6    | 5       |            |                       |                |                |
| Week 2  | Home/gym session | 1 2 3 4 5 6    | 7       |            |                       |                |                |
|         | Extra session    | 1 2 3 4 5 6    | 7       |            |                       |                |                |
| Week 3  | Home/gym session | 1 2 3 4 5 6    | 9       |            |                       |                |                |
|         | Extra session    | 1 2 3 4 5 6    | 9       |            |                       |                |                |
| Week 4  | Home/gym session | 1 2 3 4 5 6    | 5       |            |                       |                |                |
|         | Extra session    | 1 2 3 4 5 6    | 5       |            |                       |                |                |
| Week 5  | Home/gym session | 1 2 3 4 5 6    | 7       |            |                       |                |                |
|         | Extra session    | 1 2 3 4 5 6    | 7       |            |                       |                |                |
| Week 6  | Home/gym session | 1 2 3 4 5 6    | 7       |            |                       |                |                |
|         | Extra session    | 1 2 3 4 5 6    | 7       |            |                       |                |                |
| Week 7  | Home/gym session | 1 2 3 4 5 6    | 9       |            |                       |                |                |
|         | Extra session    | 1 2 3 4 5 6    | 9       |            |                       |                |                |
| Week 8  | Home/gym session | 1 2 3 4 5 6    | 5       |            |                       |                |                |
|         | Extra session    | 1 2 3 4 5 6    | 5       |            |                       |                |                |
| Week 9  | Home/gym session | 1 2 3 4 5 6    | 7       |            |                       |                |                |
|         | Extra session    | 1 2 3 4 5 6    | 7       |            |                       |                |                |
| Week 10 | Home/gym session | 1 2 3 4 5 6    | 7       |            |                       |                |                |
|         | Extra session    | 1 2 3 4 5 6    | 7       |            |                       |                |                |
| Week 11 | Home/gym session | 1 2 3 4 5 6    | 9       |            |                       |                |                |
|         | Extra session    | 1 2 3 4 5 6    | 9       |            |                       |                |                |
| Week 12 | Home/gym session | 1 2 3 4 5 6    | 5       |            |                       |                |                |
|         | Extra session    | 1 2 3 4 5 6    | 5       |            |                       |                |                |
| Week 13 | Home/gym session | 1 2 3 4 5 6    | 7       |            |                       |                |                |
|         | Extra session    | 1 2 3 4 5 6    | 7       |            |                       |                |                |
| Week 14 | Home/gym session | 1 2 3 4 5 6    | 7       |            |                       |                |                |
|         | Extra session    | 1 2 3 4 5 6    | 7       |            |                       |                |                |
| Week 15 | Home/gym session | 1 2 3 4 5 6    | 9       |            |                       |                |                |
|         | Extra session    | 1 2 3 4 5 6    | 9       |            |                       |                |                |
| Week 16 | Home/gym session | 1 2 3 4 5 6    | 9       |            |                       |                |                |
|         | Extra session    | 1 2 3 4 5 6    | 9       |            |                       |                |                |

RPE= Rating of Perceived Exertion (0=rest, 10=working as hard as possible)

- 1
- 2
- 3
- 4
- 5
- 6
- 7
- 8
- 9
- 10
- 11
- 12
- 13
- 14
- 15
- 16
- 17
- 18
- 19
- 20
- 21
- 22
- 23
- 24
- 25
- 26
- 27
- 28
- 29
- 30
- 31
- 32
- 33
- 34
- 35
- 36
- 37
- 38
- 39
- 40
- 41
- 42
- 43
- 44
- 45
- 46
- 47
- 48
- 49
- 50
- 51
- 52
- 53
- 54
- 55
- 56
- 57
- 58
- 59
- 60

For peer review only

*This page has been intentionally left blank.*

1  
2  
3  
4  
5  
6  
7  
8  
9  
10  
11  
12  
13  
14  
15  
16  
17  
18  
19  
20  
21  
22  
23  
24  
25  
26  
27  
28  
29  
30  
31  
32  
33  
34  
35  
36  
37  
38  
39  
40  
41  
42  
43  
44  
45  
46  
47  
48  
49  
50  
51  
52  
53  
54  
55  
56  
57  
58  
59  
60

# ADDITIONAL EXERCISES

For peer review only

# EXERCISE 6. TRUNK/CORE STRENGTH

Level 1 – Front plank

Plank position, contract core muscles maintaining a straight line from ankle to head (30-60 secs)

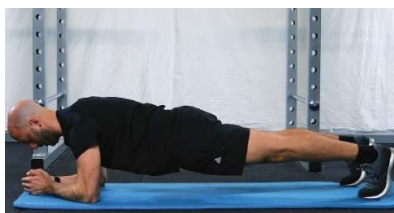

Level 2 – Front plank lift

Plank position, lift one leg, holding for 2 secs, and alternate between legs for 30-60 secs.

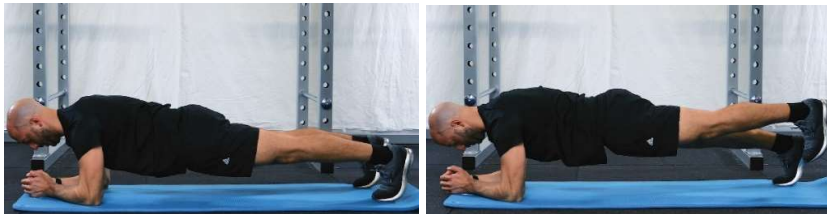

Level 3 – Front plank lift (resistance band)

Place resistance band around ankles. Move into plank position. Lift one leg stretching resistance band, holding for 2 secs, and alternate between legs for 30-60 secs.

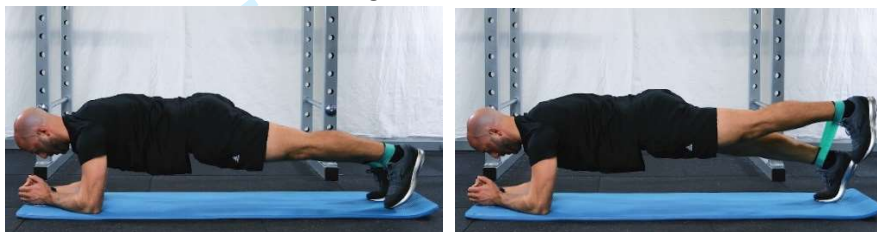

Level 4 – Side plank

Side plank position, keeping body in a straight line. Hold for 30 secs.

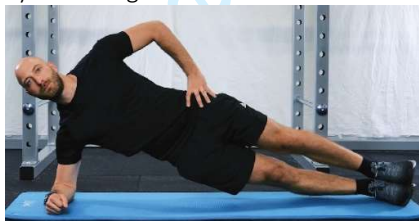

Level 5 – Side plank lift

Side plank position, lift your top leg. Hold for 2 secs, then slowly return. Repeat for 30-60 secs.

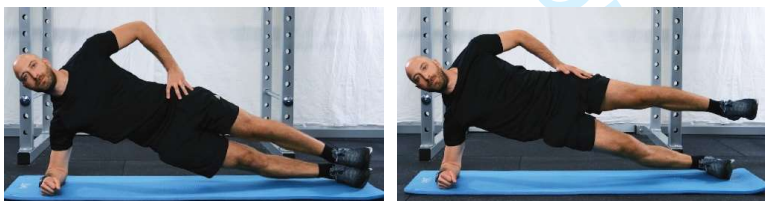

Level 6 – Side plank lift (resistance band)

Side plank position. Resistance band around ankles. Lift the top leg up stretching the resistance band and lower. Repeat for 30-60 secs.

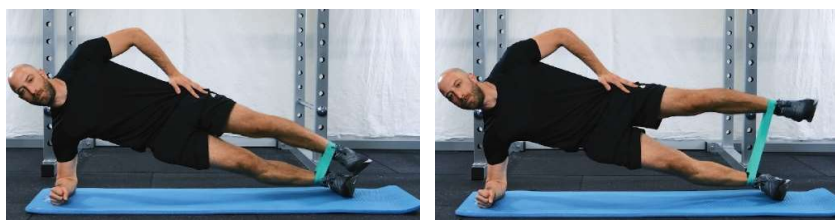

**Exercise 6: TRUNK/CORE STRENGTH**
**HOME/GYM RECORD**

|         |                  | Level (circle) | Aim RPE | Actual RPE | Kilos | Number of sets | Number of reps |
|---------|------------------|----------------|---------|------------|-------|----------------|----------------|
| Week 1  | Home/gym session | 1 2 3 4 5 6    | 5/10    |            |       |                |                |
|         | Extra session    | 1 2 3 4 5 6    | 5       |            |       |                |                |
| Week 2  | Home/gym session | 1 2 3 4 5 6    | 7       |            |       |                |                |
|         | Extra session    | 1 2 3 4 5 6    | 7       |            |       |                |                |
| Week 3  | Home/gym session | 1 2 3 4 5 6    | 9       |            |       |                |                |
|         | Extra session    | 1 2 3 4 5 6    | 9       |            |       |                |                |
| Week 4  | Home/gym session | 1 2 3 4 5 6    | 5       |            |       |                |                |
|         | Extra session    | 1 2 3 4 5 6    | 5       |            |       |                |                |
| Week 5  | Home/gym session | 1 2 3 4 5 6    | 7       |            |       |                |                |
|         | Extra session    | 1 2 3 4 5 6    | 7       |            |       |                |                |
| Week 6  | Home/gym session | 1 2 3 4 5 6    | 7       |            |       |                |                |
|         | Extra session    | 1 2 3 4 5 6    | 7       |            |       |                |                |
| Week 7  | Home/gym session | 1 2 3 4 5 6    | 9       |            |       |                |                |
|         | Extra session    | 1 2 3 4 5 6    | 9       |            |       |                |                |
| Week 8  | Home/gym session | 1 2 3 4 5 6    | 5       |            |       |                |                |
|         | Extra session    | 1 2 3 4 5 6    | 5       |            |       |                |                |
| Week 9  | Home/gym session | 1 2 3 4 5 6    | 7       |            |       |                |                |
|         | Extra session    | 1 2 3 4 5 6    | 7       |            |       |                |                |
| Week 10 | Home/gym session | 1 2 3 4 5 6    | 7       |            |       |                |                |
|         | Extra session    | 1 2 3 4 5 6    | 7       |            |       |                |                |
| Week 11 | Home/gym session | 1 2 3 4 5 6    | 9       |            |       |                |                |
|         | Extra session    | 1 2 3 4 5 6    | 9       |            |       |                |                |
| Week 12 | Home/gym session | 1 2 3 4 5 6    | 5       |            |       |                |                |
|         | Extra session    | 1 2 3 4 5 6    | 5       |            |       |                |                |
| Week 13 | Home/gym session | 1 2 3 4 5 6    | 7       |            |       |                |                |
|         | Extra session    | 1 2 3 4 5 6    | 7       |            |       |                |                |
| Week 14 | Home/gym session | 1 2 3 4 5 6    | 7       |            |       |                |                |
|         | Extra session    | 1 2 3 4 5 6    | 7       |            |       |                |                |
| Week 15 | Home/gym session | 1 2 3 4 5 6    | 9       |            |       |                |                |
|         | Extra session    | 1 2 3 4 5 6    | 9       |            |       |                |                |
| Week 16 | Home/gym session | 1 2 3 4 5 6    | 9       |            |       |                |                |
|         | Extra session    | 1 2 3 4 5 6    | 9       |            |       |                |                |

RPE= Rating of Perceived Exertion (0=rest, 10=working as hard as possible)



# EXERCISE 7. HIP ABDUCTION (OUTER THIGH)

Level 1 – Standing hip abduction with resistance band

Move your leg straight out to the side, tightening the resistance band. Slowly return to starting position. Increase difficulty by increasing resistance band strength with a different colour (your physiotherapist can help you with this). Aim 2-3 sets of 8-12.

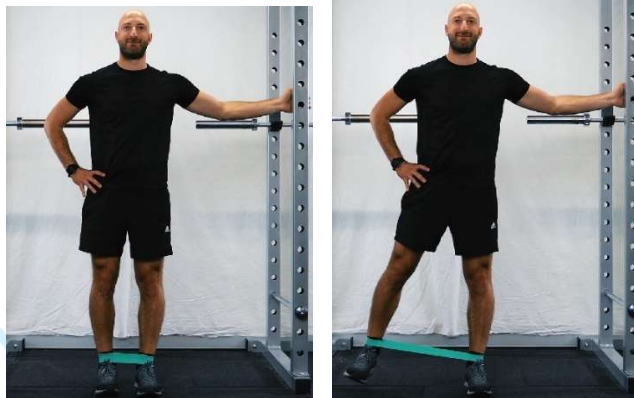

Level 2 – Standing hip abduction with cable

Move your leg straight out to the side against cable resistance, slowly return to starting position. Aim 2-3 sets of 8-12.

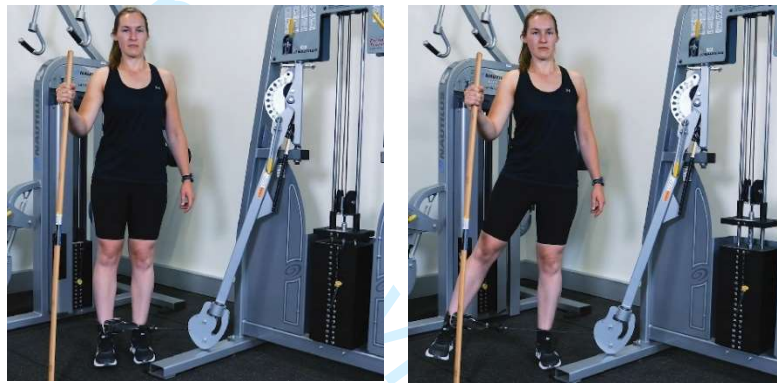

Level 3 – Crab walk

In squat position (hip/knee slightly flexed) walk sideways (20 steps each way) keeping your upper body straight and tension in the resistance band. Increase difficulty by moving band to forefoot or increasing resistance.

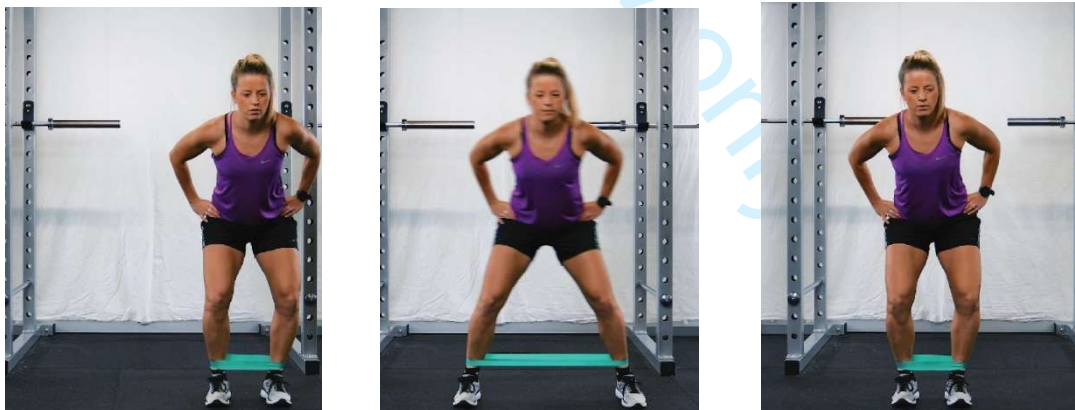

**Exercise 7: HIP ABDUCTION (OUTER THIGH)**
**HOME/GYM RECORD**

|         |                  | Level (circle) | Aim RPE | Actual RPE | Kilos on affected leg | Number of sets | Number of reps |
|---------|------------------|----------------|---------|------------|-----------------------|----------------|----------------|
| Week 1  | Home/gym session | 1 2 3          | 5/10    |            |                       |                |                |
|         | Extra session    | 1 2 3          | 5       |            |                       |                |                |
| Week 2  | Home/gym session | 1 2 3          | 7       |            |                       |                |                |
|         | Extra session    | 1 2 3          | 7       |            |                       |                |                |
| Week 3  | Home/gym session | 1 2 3          | 9       |            |                       |                |                |
|         | Extra session    | 1 2 3          | 9       |            |                       |                |                |
| Week 4  | Home/gym session | 1 2 3          | 5       |            |                       |                |                |
|         | Extra session    | 1 2 3          | 5       |            |                       |                |                |
| Week 5  | Home/gym session | 1 2 3          | 7       |            |                       |                |                |
|         | Extra session    | 1 2 3          | 7       |            |                       |                |                |
| Week 6  | Home/gym session | 1 2 3          | 7       |            |                       |                |                |
|         | Extra session    | 1 2 3          | 7       |            |                       |                |                |
| Week 7  | Home/gym session | 1 2 3          | 9       |            |                       |                |                |
|         | Extra session    | 1 2 3          | 9       |            |                       |                |                |
| Week 8  | Home/gym session | 1 2 3          | 5       |            |                       |                |                |
|         | Extra session    | 1 2 3          | 5       |            |                       |                |                |
| Week 9  | Home/gym session | 1 2 3          | 7       |            |                       |                |                |
|         | Extra session    | 1 2 3          | 7       |            |                       |                |                |
| Week 10 | Home/gym session | 1 2 3          | 7       |            |                       |                |                |
|         | Extra session    | 1 2 3          | 7       |            |                       |                |                |
| Week 11 | Home/gym session | 1 2 3          | 9       |            |                       |                |                |
|         | Extra session    | 1 2 3          | 9       |            |                       |                |                |
| Week 12 | Home/gym session | 1 2 3          | 5       |            |                       |                |                |
|         | Extra session    | 1 2 3          | 5       |            |                       |                |                |
| Week 13 | Home/gym session | 1 2 3          | 7       |            |                       |                |                |
|         | Extra session    | 1 2 3          | 7       |            |                       |                |                |
| Week 14 | Home/gym session | 1 2 3          | 7       |            |                       |                |                |
|         | Extra session    | 1 2 3          | 7       |            |                       |                |                |
| Week 15 | Home/gym session | 1 2 3          | 9       |            |                       |                |                |
|         | Extra session    | 1 2 3          | 9       |            |                       |                |                |
| Week 16 | Home/gym session | 1 2 3          | 9       |            |                       |                |                |
|         | Extra session    | 1 2 3          | 9       |            |                       |                |                |

RPE= Rating of Perceived Exertion (0=rest, 10=working as hard as possible)

## EXERCISE 8. HIP ADDUCTION (INNER THIGH)

### Level 1 – Hip adduction with resistance band

Standing maintaining good alignment, move your leg toward your body, tightening resistance band and slowly return to the starting position. Aim 2-3 sets of 8-12.

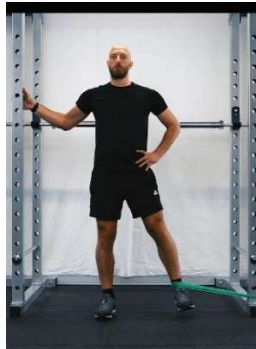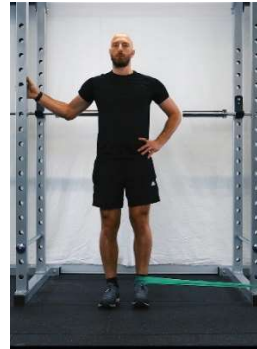

### Level 2 – Hip adduction with cable

Standing maintaining good alignment, move your leg toward your body and slowly return to the starting position. Aim 2-3 sets of 8-12.

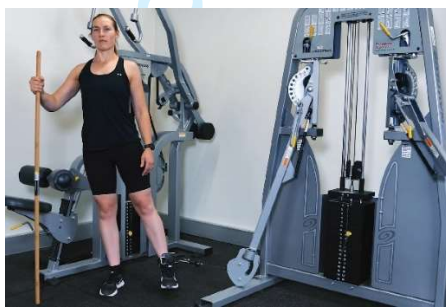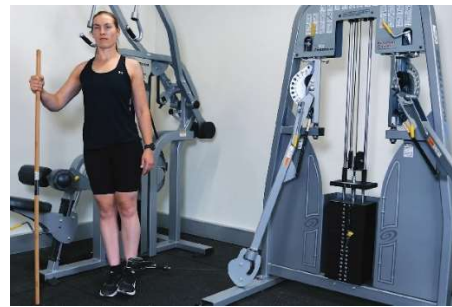

### Level 3 – Groin plank - knee

Side plank position with upper leg (knee) on chair, slowly lift and lower your bottom leg to the under surface of the chair. Aim 1-3 sets of 8-12.

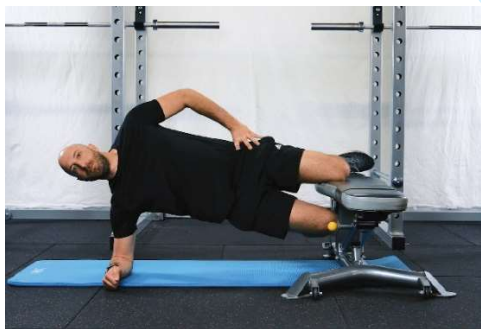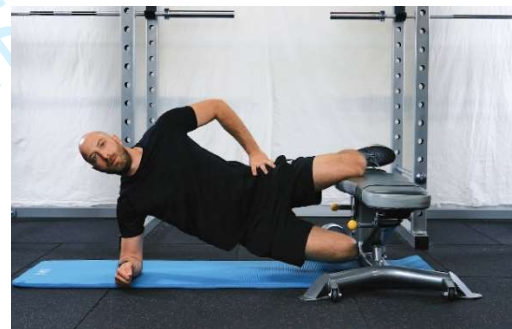

### Level 4 – Groin plank ankle

Side plank position with upper leg (foot) on chair, slowly lift and lower your bottom leg to the under surface of the chair. Aim 1-3 sets of 8-12.

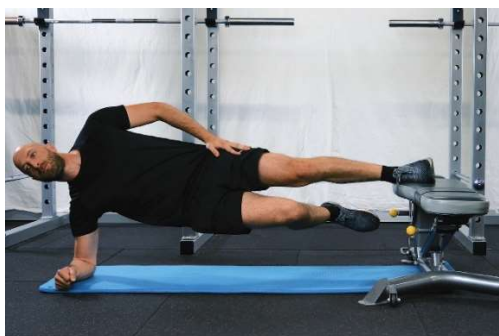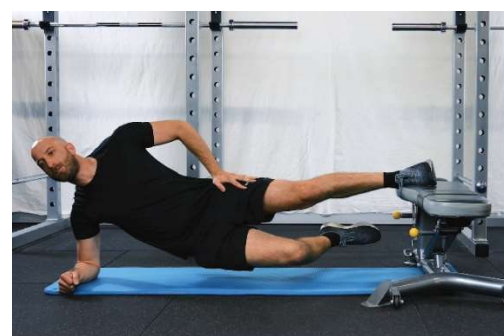

**Exercise 8: HIP ADDUCTION (INNER THIGH)**
**HOME/GYM RECORD**

|         |                  | Level (circle) | Aim RPE | Actual RPE | Kilos on affected leg | Number of sets | Number of reps |
|---------|------------------|----------------|---------|------------|-----------------------|----------------|----------------|
| Week 1  | Home/gym session | 1 2 3 4        | 5/10    |            |                       |                |                |
|         | Extra session    | 1 2 3 4        | 5       |            |                       |                |                |
| Week 2  | Home/gym session | 1 2 3 4        | 7       |            |                       |                |                |
|         | Extra session    | 1 2 3 4        | 7       |            |                       |                |                |
| Week 3  | Home/gym session | 1 2 3 4        | 9       |            |                       |                |                |
|         | Extra session    | 1 2 3 4        | 9       |            |                       |                |                |
| Week 4  | Home/gym session | 1 2 3 4        | 5       |            |                       |                |                |
|         | Extra session    | 1 2 3 4        | 5       |            |                       |                |                |
| Week 5  | Home/gym session | 1 2 3 4        | 7       |            |                       |                |                |
|         | Extra session    | 1 2 3 4        | 7       |            |                       |                |                |
| Week 6  | Home/gym session | 1 2 3 4        | 7       |            |                       |                |                |
|         | Extra session    | 1 2 3 4        | 7       |            |                       |                |                |
| Week 7  | Home/gym session | 1 2 3 4        | 9       |            |                       |                |                |
|         | Extra session    | 1 2 3 4        | 9       |            |                       |                |                |
| Week 8  | Home/gym session | 1 2 3 4        | 5       |            |                       |                |                |
|         | Extra session    | 1 2 3 4        | 5       |            |                       |                |                |
| Week 9  | Home/gym session | 1 2 3 4        | 7       |            |                       |                |                |
|         | Extra session    | 1 2 3 4        | 7       |            |                       |                |                |
| Week 10 | Home/gym session | 1 2 3 4        | 7       |            |                       |                |                |
|         | Extra session    | 1 2 3 4        | 7       |            |                       |                |                |
| Week 11 | Home/gym session | 1 2 3 4        | 9       |            |                       |                |                |
|         | Extra session    | 1 2 3 4        | 9       |            |                       |                |                |
| Week 12 | Home/gym session | 1 2 3 4        | 5       |            |                       |                |                |
|         | Extra session    | 1 2 3 4        | 5       |            |                       |                |                |
| Week 13 | Home/gym session | 1 2 3 4        | 7       |            |                       |                |                |
|         | Extra session    | 1 2 3 4        | 7       |            |                       |                |                |
| Week 14 | Home/gym session | 1 2 3 4        | 7       |            |                       |                |                |
|         | Extra session    | 1 2 3 4        | 7       |            |                       |                |                |
| Week 15 | Home/gym session | 1 2 3 4        | 9       |            |                       |                |                |
|         | Extra session    | 1 2 3 4        | 9       |            |                       |                |                |
| Week 16 | Home/gym session | 1 2 3 4        | 9       |            |                       |                |                |
|         | Extra session    | 1 2 3 4        | 9       |            |                       |                |                |

RPE= Rating of Perceived Exertion (0=rest, 10=working as hard as possible)

## EXERCISE 9. CALF

On two legs standing on the edge of a step, raise up onto your toes and then lower both heels back down below the step. Only light support with hands to maintain balance. Aim 2-3 sets of 8-12.

Level 1 – Double leg calf raises

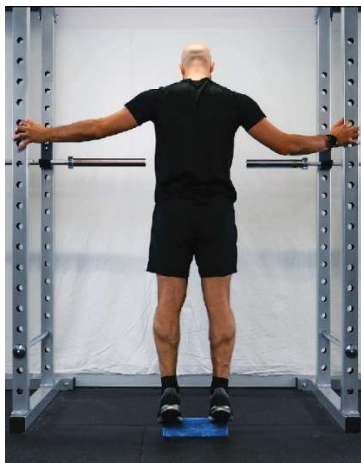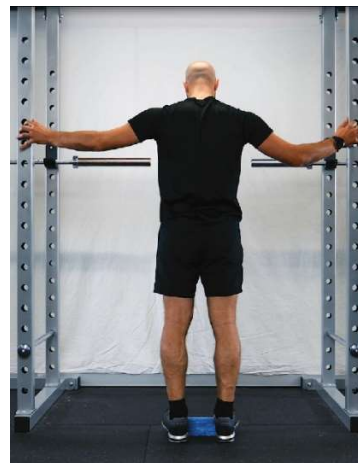

On one leg standing on the edge of a step, raise up onto your toe and then lower heel back down below the step. Only light support with hands to maintain balance. Aim 2-3 sets of 8-12.

Level 2 – Single leg calf raises

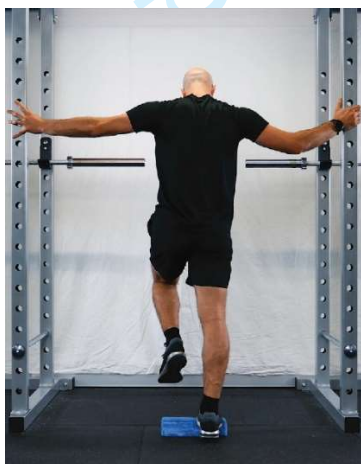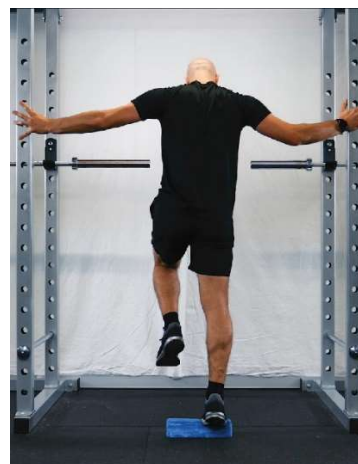

Same exercise as Level 2 but add a weight in your opposite hand to make the exercise harder. Aim 2-3 sets of 8-12.

Level 3 – Weighted single leg calf raises

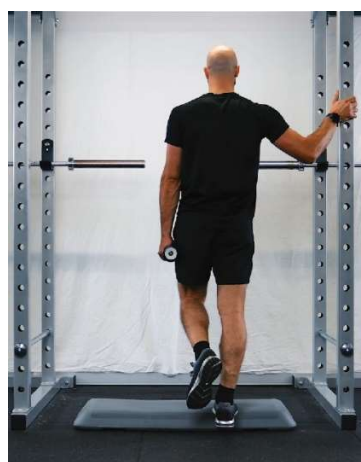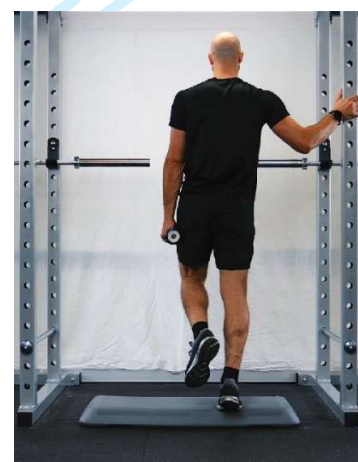

**Exercise 9: CALF**
**HOME/GYM RECORD**

|         |                  | Level (circle) | Aim RPE | Actual RPE | Kilos | Number of sets | Number of reps |
|---------|------------------|----------------|---------|------------|-------|----------------|----------------|
| Week 1  | Home/gym session | 1 2 3          | 5/10    |            |       |                |                |
|         | Extra session    | 1 2 3          | 5       |            |       |                |                |
| Week 2  | Home/gym session | 1 2 3          | 7       |            |       |                |                |
|         | Extra session    | 1 2 3          | 7       |            |       |                |                |
| Week 3  | Home/gym session | 1 2 3          | 9       |            |       |                |                |
|         | Extra session    | 1 2 3          | 9       |            |       |                |                |
| Week 4  | Home/gym session | 1 2 3          | 5       |            |       |                |                |
|         | Extra session    | 1 2 3          | 5       |            |       |                |                |
| Week 5  | Home/gym session | 1 2 3          | 7       |            |       |                |                |
|         | Extra session    | 1 2 3          | 7       |            |       |                |                |
| Week 6  | Home/gym session | 1 2 3          | 7       |            |       |                |                |
|         | Extra session    | 1 2 3          | 7       |            |       |                |                |
| Week 7  | Home/gym session | 1 2 3          | 9       |            |       |                |                |
|         | Extra session    | 1 2 3          | 9       |            |       |                |                |
| Week 8  | Home/gym session | 1 2 3          | 5       |            |       |                |                |
|         | Extra session    | 1 2 3          | 5       |            |       |                |                |
| Week 9  | Home/gym session | 1 2 3          | 7       |            |       |                |                |
|         | Extra session    | 1 2 3          | 7       |            |       |                |                |
| Week 10 | Home/gym session | 1 2 3          | 7       |            |       |                |                |
|         | Extra session    | 1 2 3          | 7       |            |       |                |                |
| Week 11 | Home/gym session | 1 2 3          | 9       |            |       |                |                |
|         | Extra session    | 1 2 3          | 9       |            |       |                |                |
| Week 12 | Home/gym session | 1 2 3          | 5       |            |       |                |                |
|         | Extra session    | 1 2 3          | 5       |            |       |                |                |
| Week 13 | Home/gym session | 1 2 3          | 7       |            |       |                |                |
|         | Extra session    | 1 2 3          | 7       |            |       |                |                |
| Week 14 | Home/gym session | 1 2 3          | 7       |            |       |                |                |
|         | Extra session    | 1 2 3          | 7       |            |       |                |                |
| Week 15 | Home/gym session | 1 2 3          | 9       |            |       |                |                |
|         | Extra session    | 1 2 3          | 9       |            |       |                |                |
| Week 16 | Home/gym session | 1 2 3          | 9       |            |       |                |                |
|         | Extra session    | 1 2 3          | 9       |            |       |                |                |

RPE= Rating of Perceived Exertion (0=rest, 10=working as hard as possible)

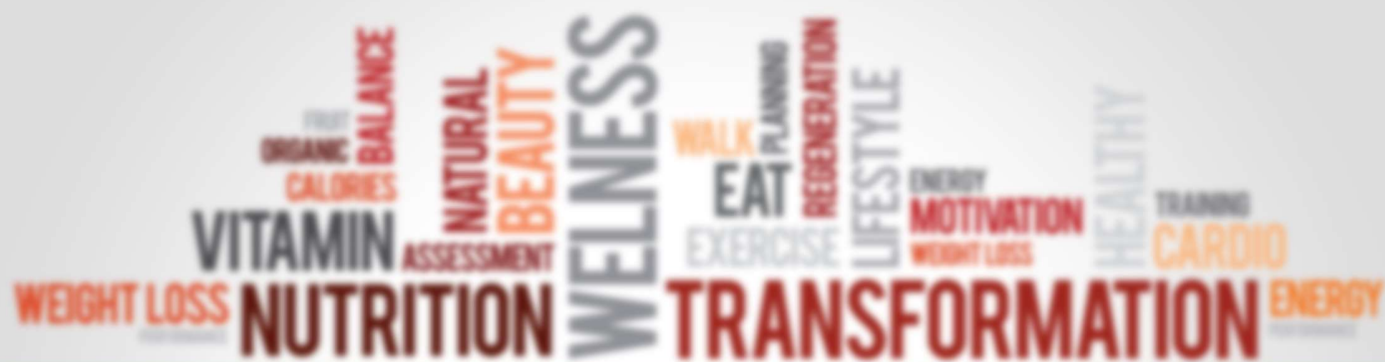

# EXERCISE

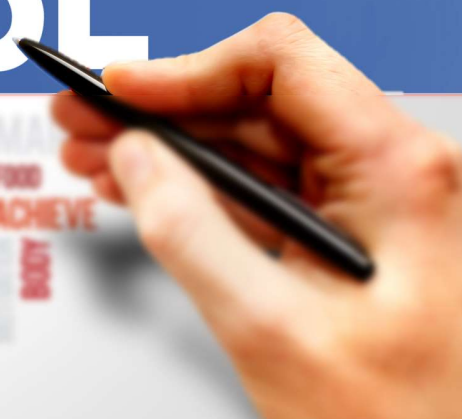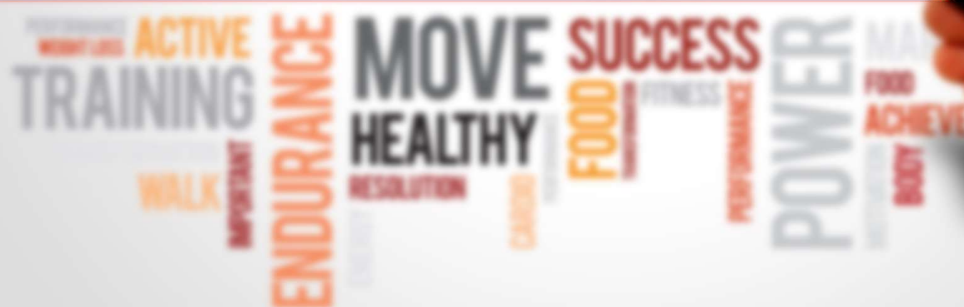

# SUPER knee

Optimising outcomes following anterior cruciate ligament reconstruction

## PARTICIPANT HANDBOOK

## 13. WHAT CAN I DO TO STRENGTHEN MY QUADRICEPS?

Start with a moderately difficult exercise and progress according to the guidelines set out in the handbook (see section 8 "How hard should I exercise?").

### Progress quadricep muscles exercises by:

1. Use one leg instead of two
2. Add a weight or increase the weight
3. Increase the depth of exercise
4. Increase the speed of the exercise
5. Increase number of repetitions

### Home or gym exercises

#### Option 1 – Double leg squats

With even weight on both legs, bend your knees evenly and squat down to a chair height. Make sure your knees don't move in or out and keep your trunk upright. Return to upright standing. If this is too hard, just squat down as far as you can.

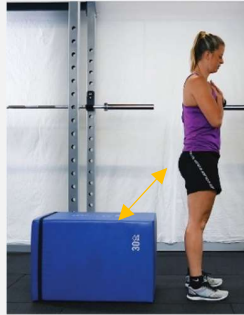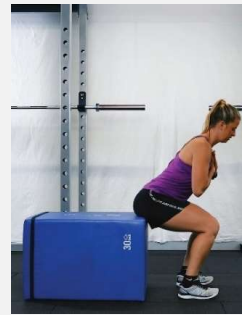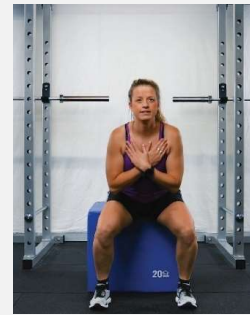

#### Option 2 – Bulgarian split squat

Put your back leg up on a stable elevated object and so that your front knee is at 90°. Try and keep most of your weight on your front leg. Keep your knees over your toes and don't let your hips drop.

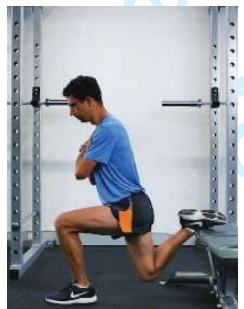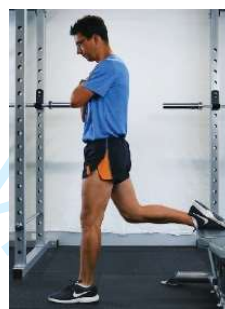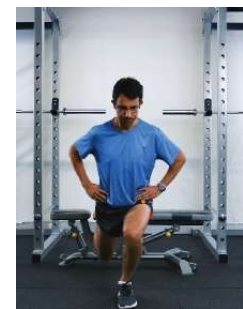

### Gym exercises

#### Option 3 – Knee extension machine

In the seated knee extension machine, straighten your knee against resistance. Start at 90° knee bend and straighten to full knee extension.

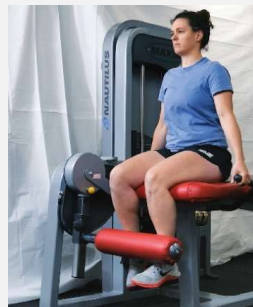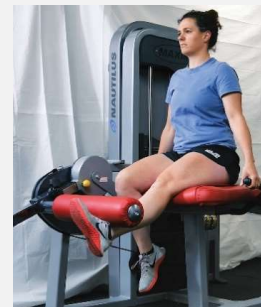

#### Option 4 – Leg press

Using the leg press machine, press against the resistance while keeping your knees in good alignment (knees over toes). Don't fully lock your knees out. Start with a leg press set at 45° knee bend.

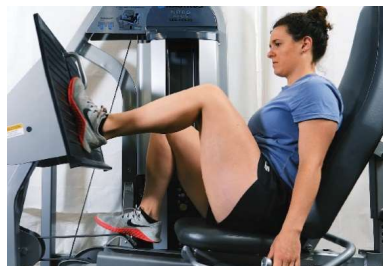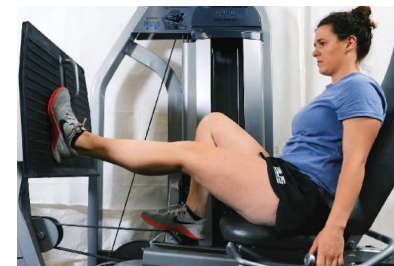



## 14. WHAT CAN I DO TO STRENGTHEN MY HAMSTRINGS?

Start with a moderately difficult exercise and progress according to the guidelines set out in the handbook (see section 8 "How hard should I exercise?").

**Progress hamstring muscle exercises by:**

1. Add a weight or increase the weight
2. Increase number of repetitions

### Home or gym exercises

#### Option 1 – Elevated bridge

Lying on your back with both legs elevated on a stable object use your hamstrings to lift your hips off the ground so that your back and legs are in a straight line. Use your hands for stability as needed.

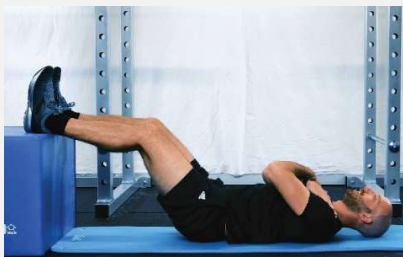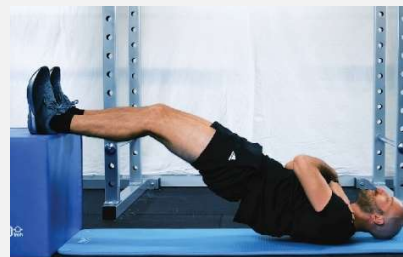

To progress this exercise:

- Straighten your knee more
- Increase box/bench height

#### Option 2 – Single leg elevated bridge

Lying on your back with one leg elevated and slightly bent, on a stable object use your hamstrings to lift your hips off the ground so that your back and legs are in a straight line. Use your hands for stability as needed.

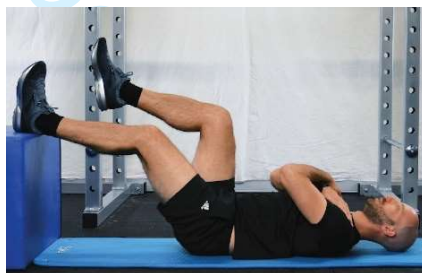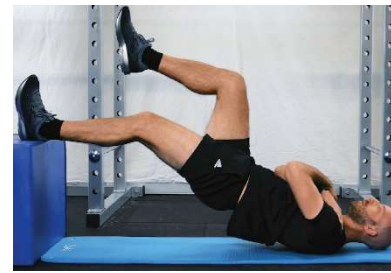

### Gym exercises

#### Option 3– Deadlifts

With straight legs or a very slight knee bend, bend from your hips as far as comfortable (aim for the weight to be below your knees), then use your hamstring muscles to pull yourself back up to standing. Make sure you don't bend from your spine, but instead keep it straight.

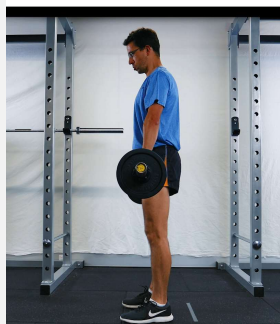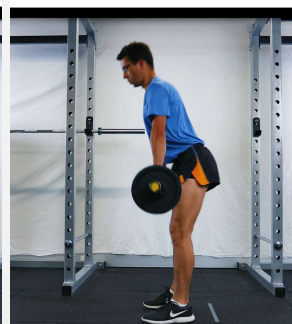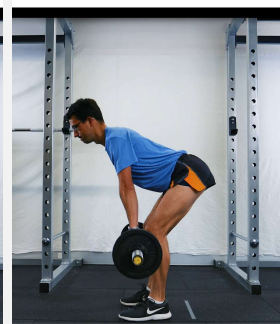

#### Option 4 – Hamstring curl machine

In the gym, use the hamstring curl machine to work against the resistance to bring your heel to your hips. Start with your legs close to fully straight and bend to about 90°. Make sure you feel your hamstring muscle work.

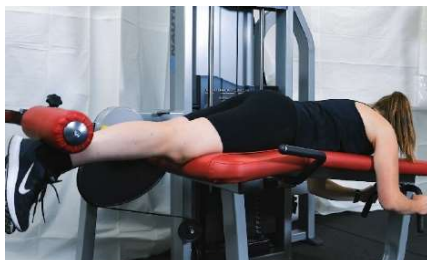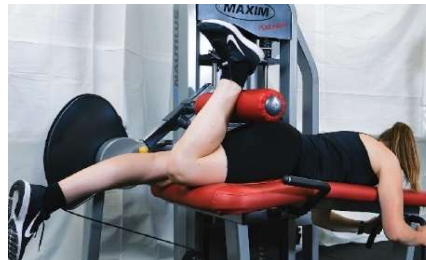

## 15. WHAT CAN I DO TO IMPROVE MY PLYOMETRIC POWER?

Start with a moderately difficult exercise and progress according to the guidelines set out in the handbook (see section 8 “How hard should I exercise?”).

**PLYOMETRIC POWER** – Your ability to jump and land with both control and speed.

**Progress jumping exercises by:**

1. Increase the speed of jumping
2. Increase the number of jumps

### Home or gym exercises

#### Option 1 – Double leg forward jump

Jump as high as possible landing softly bending at the hips and knees. Progress to jumping forwards as far as possible.

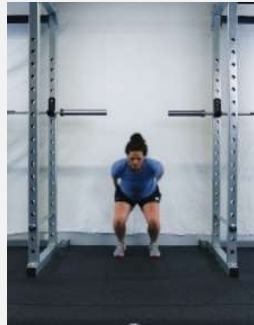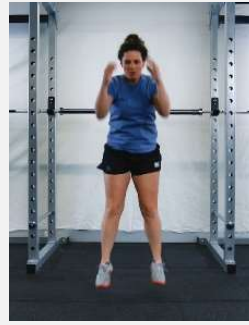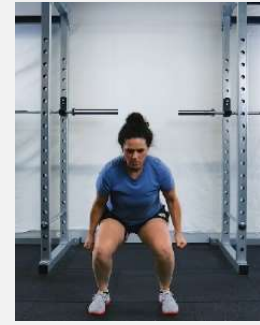

#### Option 2 – Single leg forward hop

Hop forward on one leg landing softly bending at your hips and knees. Keep good alignment. Increase distance/speed.

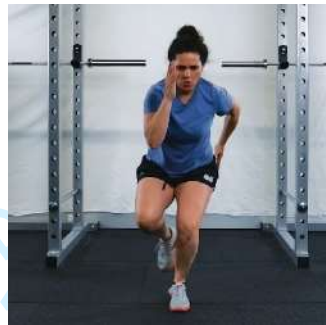

#### Option 3 – Single leg side hop

Hop side-to-side on one leg landing softly on the same leg bending at your hips and knees. Increase lateral distance.

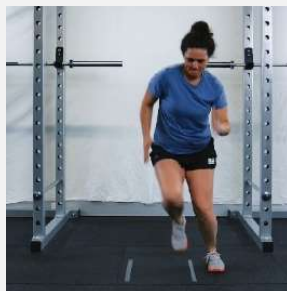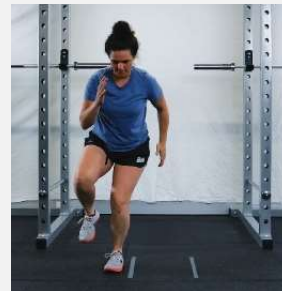

#### Option 4 – Double leg drop jump (off a step/box)

Standing on a box/step, jump down landing softly on both feet and immediately jump up as high as you can. Increase height of box or hold weights to make harder.

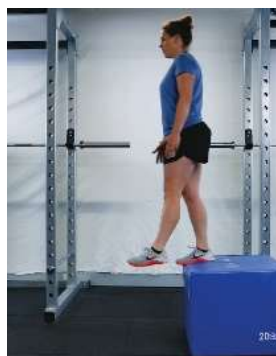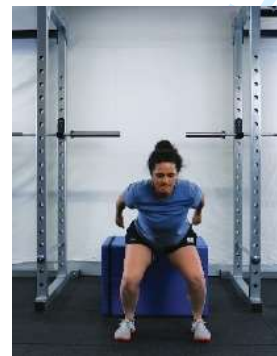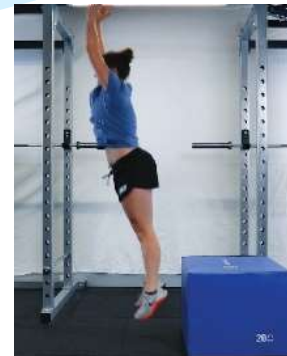

The size of the box can range from small (20cm) step to large (40-50cm as pictured). You can also progress to landing on one leg only.

## 16. WHAT CAN I DO TO STRENGTHEN MY TRUNK/CORE?

Start with a moderately difficult exercise and progress according to the guidelines set out in the handbook (see section 8 “How hard should I exercise?”).

**Progress core exercises by:**

1. Increase number of repetitions
2. Increase length of time held in position

### Home or gym exercises

#### Option 1 – Front plank

Begin on your feet and elbows and maintain a straight line from your head to your ankle, so that you do not arch your back. Hold with good control without your hips moving higher or lower.

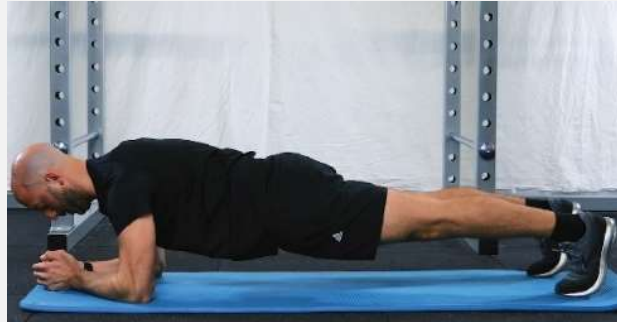

Aim to start with:

- 30 secs hold x 3 times

#### Option 2 – Front plank with leg lift

Plank position, lift one leg, holding for 2 secs, and alternate between legs for 30-60 secs.

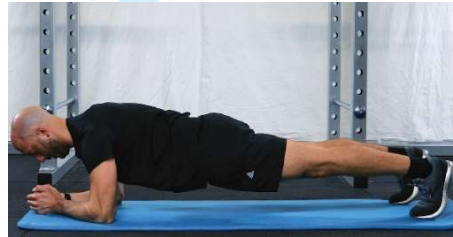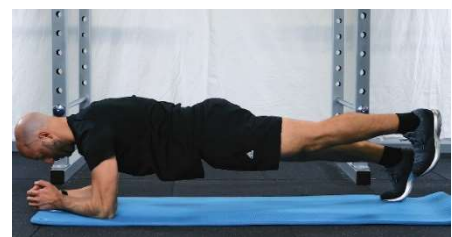

Aim to start with:

- 10 reps each leg x 3 sets

#### Option 3 – Side planks

Start on your elbow and side of your feet and maintain a straight line from your shoulders to your ankles. Hold the position with good control without holding your hips too high or low.

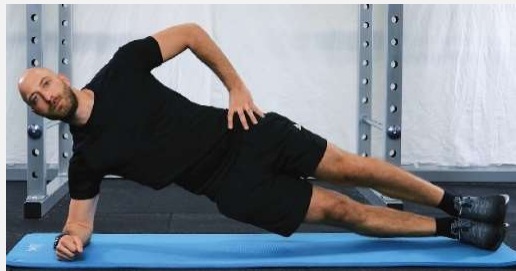

Aim to start with:

- 30 secs hold x 3 times

#### Option 4 – Side plank with leg lift

Side plank position, leading with your heel, lift your top leg. Hold for 2 secs, then slowly return to starting position.

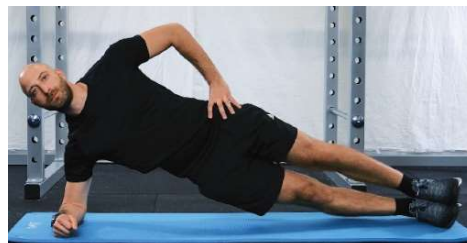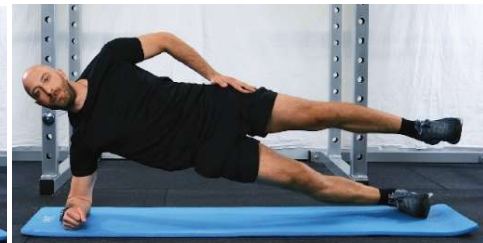

Aim to start with:

- 10 reps each leg x 3 sets

## 17. WHAT CAN I DO TO STRENGTHEN MY HIPS?

Start with a moderately difficult exercise and progress according to the guidelines set out in the handbook (see section 8 “How hard should I exercise?”).

**Progress hip muscle exercises by:**

1. Add a weight or increase the weight
2. Increase the height or width of exercise
3. Increase the speed of the exercise
4. Increase number of repetitions

**Home or gym exercises**

Option 1 – Standing hip

abduction with resistance band

Move your leg straight out to the side tightening resistance band. Slowly return to starting position. Increase difficulty by increasing resistance band strength.

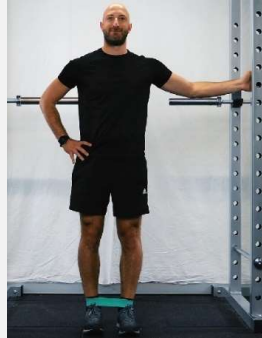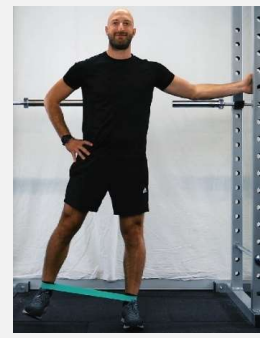

Option 2 – Crab walk

In squat position (hip/knee slightly flexed) walk sideways (20 steps each way) keeping your upper body straight and tension in the resistance band. Increase difficulty by moving band to foot.

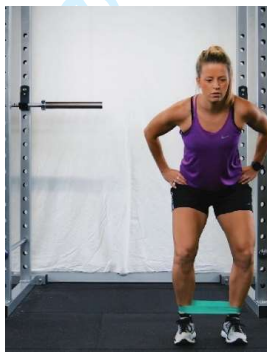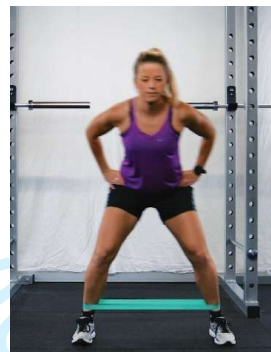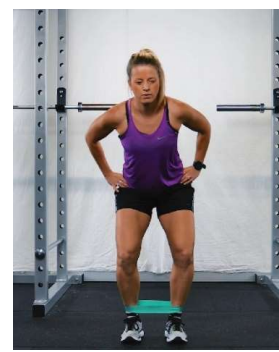

Option 3 – Resistance band hip  
adduction

Standing maintaining good alignment, move your leg toward your body, tightening resistance band, and slowly return to the starting position.

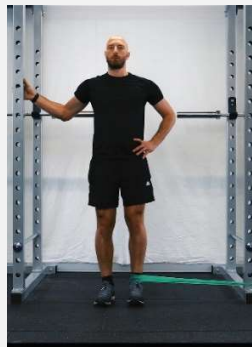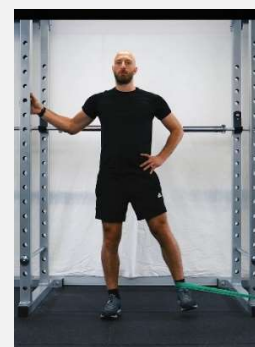

Option 4 – Groin/adductor  
plank

Side plank position with upper leg (knee) on chair, slowly lift and lower your bottom leg to the under surface of the chair.

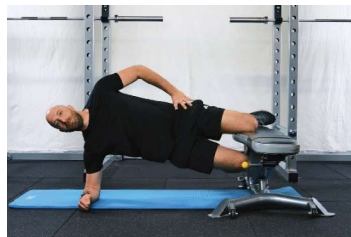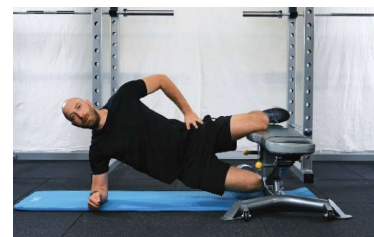

## 18. WHAT CAN I DO TO STRENGTHEN MY CALVES?

Start with a moderately difficult exercise and progress according to the guidelines set out in the handbook (see section 8 “How hard should I exercise?”).

**Progress calf muscle exercises by:**

- |                                        |                                       |
|----------------------------------------|---------------------------------------|
| 1. Increase the speed of the exercise  | 5. Increase the depth of exercise     |
| 2. Increase number of repetitions      | 6. Increase the speed of the exercise |
| 3. Use one leg instead of two          | 7. Increase number of repetitions     |
| 4. Add a weight or increase the weight |                                       |

### Home or gym exercises

#### Option 1 - Calf raise (double leg and single leg)

Standing off a small step/object about 5-10 cm high on two legs, raise your heels off the ground, and lower back down to the ground.

Make sure you do not rotate your ankle or foot and hold at the top for balance. Hold something lightly for balance if needed.

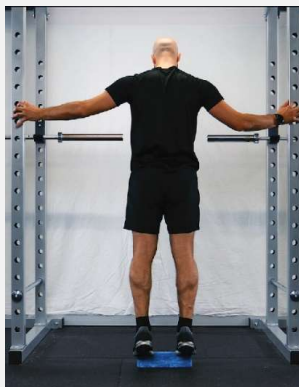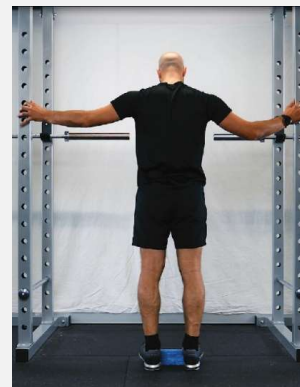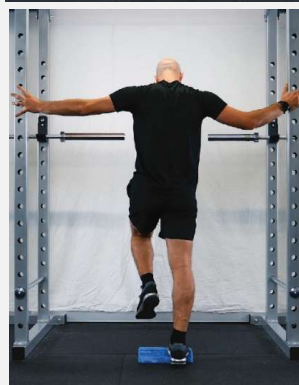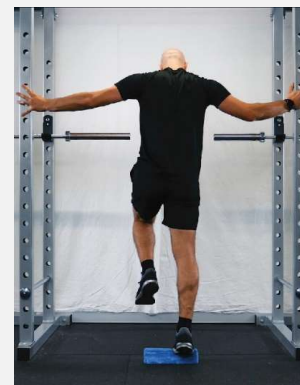

#### Option 2 – Calf raise with weights

Same exercise as option 1 but add a weight in your opposite hand to make the exercise harder.

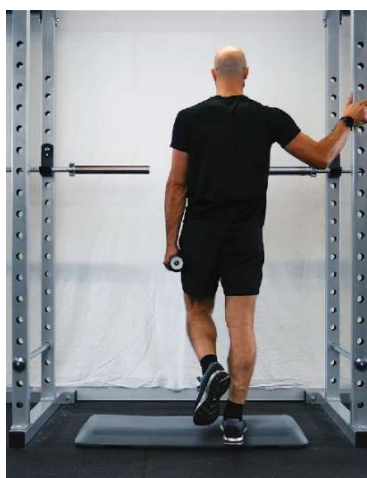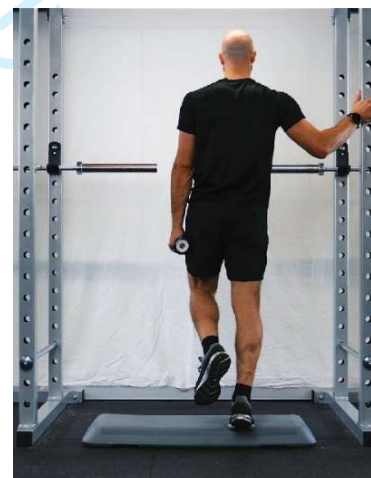

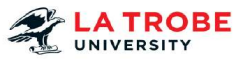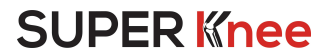

| Date | Exercise                                                                                 | Reps & Sets                                        | Weight                                             | RPE /10                                            |
|------|------------------------------------------------------------------------------------------|----------------------------------------------------|----------------------------------------------------|----------------------------------------------------|
|      | 1 Quadriceps<br>2 Hamstrings<br>3 Plyometric power<br>4 Trunk/core<br>5 Hips<br>6 Calves | -----<br>-----<br>-----<br>-----<br>-----<br>----- | -----<br>-----<br>-----<br>-----<br>-----<br>----- | -----<br>-----<br>-----<br>-----<br>-----<br>----- |
|      | 1 Quadriceps<br>2 Hamstrings<br>3 Plyometric power<br>4 Trunk/core<br>5 Hips<br>6 Calves | -----<br>-----<br>-----<br>-----<br>-----<br>----- | -----<br>-----<br>-----<br>-----<br>-----<br>----- | -----<br>-----<br>-----<br>-----<br>-----<br>----- |
|      | 1 Quadriceps<br>2 Hamstrings<br>3 Plyometric power<br>4 Trunk/core<br>5 Hips<br>6 Calves | -----<br>-----<br>-----<br>-----<br>-----<br>----- | -----<br>-----<br>-----<br>-----<br>-----<br>----- | -----<br>-----<br>-----<br>-----<br>-----<br>----- |
|      | 1 Quadriceps<br>2 Hamstrings<br>3 Plyometric power<br>4 Trunk/core<br>5 Hips<br>6 Calves | -----<br>-----<br>-----<br>-----<br>-----<br>----- | -----<br>-----<br>-----<br>-----<br>-----<br>----- | -----<br>-----<br>-----<br>-----<br>-----<br>----- |
|      | 1 Quadriceps<br>2 Hamstrings<br>3 Plyometric power<br>4 Trunk/core<br>5 Hips<br>6 Calves | -----<br>-----<br>-----<br>-----<br>-----<br>----- | -----<br>-----<br>-----<br>-----<br>-----<br>----- | -----<br>-----<br>-----<br>-----<br>-----<br>----- |
|      | 1 Quadriceps<br>2 Hamstrings<br>3 Plyometric power<br>4 Trunk/core<br>5 Hips<br>6 Calves | -----<br>-----<br>-----<br>-----<br>-----<br>----- | -----<br>-----<br>-----<br>-----<br>-----<br>----- | -----<br>-----<br>-----<br>-----<br>-----<br>----- |
|      | 1 Quadriceps<br>2 Hamstrings<br>3 Plyometric power<br>4 Trunk/core<br>5 Hips<br>6 Calves | -----<br>-----<br>-----<br>-----<br>-----<br>----- | -----<br>-----<br>-----<br>-----<br>-----<br>----- | -----<br>-----<br>-----<br>-----<br>-----<br>----- |
|      | 1 Quadriceps<br>2 Hamstrings<br>3 Plyometric power<br>4 Trunk/core<br>5 Hips<br>6 Calves | -----<br>-----<br>-----<br>-----<br>-----<br>----- | -----<br>-----<br>-----<br>-----<br>-----<br>----- | -----<br>-----<br>-----<br>-----<br>-----<br>----- |

**Supplementary File 4.** Details of physical performance tests*Battery of hops: single hop, triple crossover hop, and side hop*

The single hop for distance assesses the distance (cm) the participant can hop from a stationary position, taking off and landing on the same foot. The triple cross-over hop for distance assesses the cumulative distance (cm) the participant can achieve by hopping three consecutive times, crossing over the outside of two strips of tape placed 15cm apart each time. The side-hop evaluates the number of hops participants can achieve (hopping side to side outside two parallel strips of tape placed 40cm apart on the floor) in 30 seconds. The vertical hop assesses the maximal height participants can hop from a stationary position. For all hop tests, participants wear their usual athletic footwear, start with their left leg (regardless of ACLR limb) and hands held behind the back. If participants make subsequent smaller hops, separate their hands or do not remain balanced, the hop is not recorded. Single, triple cross-over and vertical hops are repeated until at least three successful trials are recorded and no increase in distance is observed. The left leg is tested first.

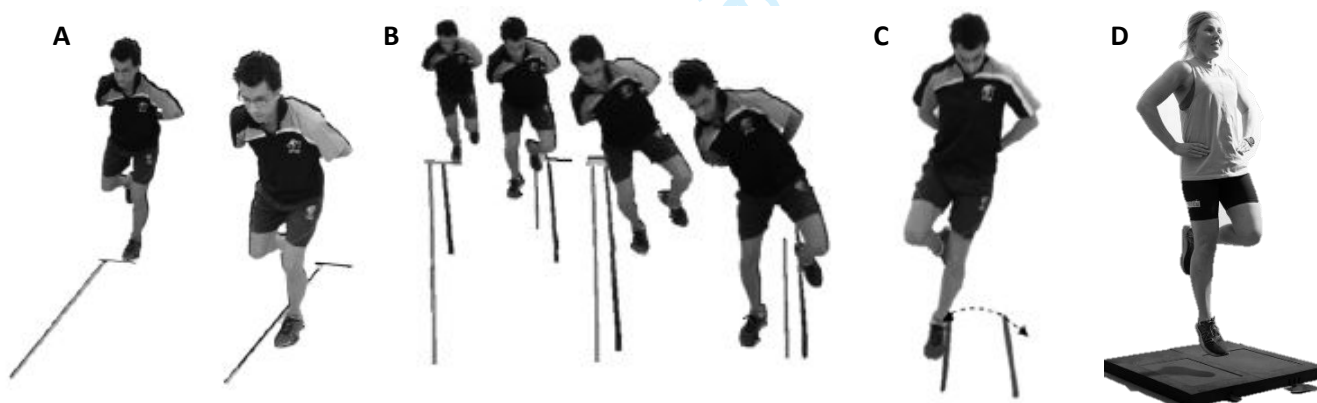

**Figure SF3.1.** Battery of hop tests. **A:** Single hop for distance; **B:** Side-hop; **C:** Triple-crossover hop for distance; **D:** Vertical hop

### *One-leg rise*

For the one-leg rise, participants sit on the edge of a plinth with the heel of the test leg on a marked line 10cm in front of the edge of the plinth. Plinth height is adjusted so the angle of the test knee in sitting is 90°. With arms folded across the chest, participants are instructed to rise from sitting to standing on one leg, achieve full knee extension, and return to lightly touch the plinth with buttocks. Rises are performed to a metronome to maintain a consistent cadence of 45 beats per minute. The maximum number of rises achieved at the predetermined cadence is recorded. The left leg is tested first.

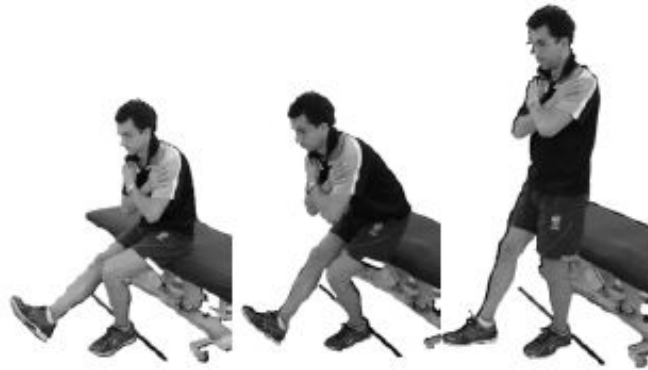

**Figure SF3.2** One leg rise test



### *Knee muscle strength*

Maximal voluntary isometric contractions are evaluated during knee extension and flexion with the knee flexed to 60° using an isokinetic dynamometer (Biodex Medical Systems, NY, USA). Participants are seated (hips/non-tested knee flexed 90°) and the centre of the knee joint is aligned with the axis of the dynamometer. Four belts are used to stabilise the trunk and non-test limb, two crossing the trunk, one around the pelvis and one on the distal thigh. An inelastic strap fixed to the dynamometer arm is placed around the distal tibia (proximal to the ankle).

Two submaximal practice contractions of 5-seconds with an interval of 30-seconds between trials are performed as a familiarisation procedure. Then, with standardised verbal encouragement, three maximal isometric contractions of 5-seconds with an interval of 30-seconds between each trial are performed. The test alternates between knee extension and knee flexion (three trials for each). The left leg is tested first. Force curves will be recorded for all trials and the peak force (Nm), normalised for body mass as appropriate (Nm/kg), used for analyses. Knee extension and flexion rate of force development will also be assessed using the slope (change in force divided by change in time) of muscle contraction onset. To correct the influence of gravity, the assessed limb is weighed before each test and the data acquisition software automatically corrects the output data.

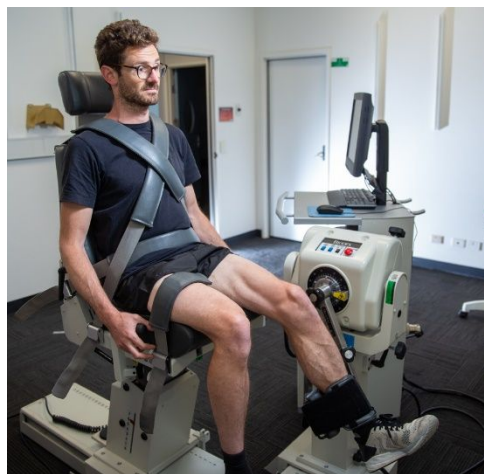

**Figure SF3.3** Set up of knee muscle strength assessment using Biodex isokinetic dynamometer

**Supplementary File 5.** Details of magnetic resonance imaging sequences acquired

|                        | <b>Proton Density weighted fat suppressed fast spin-echo<br/><i>Axial</i></b> | <b>Proton Density weighted fat suppressed fast spin-echo<br/><i>Sagittal</i></b> | <b>Proton Density weighted fat suppressed fast spin-echo<br/><i>Coronal</i></b> | <b>Multi-echo spin-echo (MESE) T2 relaxation time mapping<br/><i>Sagittal</i></b> | <b>Fast spoiled gradient echo (FSPGR)<br/><i>Sagittal</i></b> |
|------------------------|-------------------------------------------------------------------------------|----------------------------------------------------------------------------------|---------------------------------------------------------------------------------|-----------------------------------------------------------------------------------|---------------------------------------------------------------|
| Repetition time (msec) | 3725                                                                          | 2300                                                                             | 2325                                                                            | 3225                                                                              | 10.3                                                          |
| Echo time (msec)       | 36                                                                            | 36                                                                               | 36                                                                              | 10, 20, 30, 40, 50, 60, 70, 80                                                    | Minimum (~3.7)                                                |
| Acquisition matrix     | 340 x 300                                                                     | 360 x 300                                                                        | 340 x 300                                                                       | 320 x 269                                                                         | 512 x 512                                                     |
| Field of view (cm)     | 16                                                                            | 16                                                                               | 16                                                                              | 12                                                                                | 16                                                            |
| Resolution (mm)        | 0.471 x 0.533 x 3.0                                                           | 0.444 x 0.5333 x 3.0                                                             | 0.471 x 0.5333 x 3.0                                                            | 0.375 x 0.446 x 3.0                                                               | 0.313 x 0.313 x 1.5                                           |
| Slice thickness (mm)   | 3.0                                                                           | 3.0                                                                              | 3.0                                                                             | 3.0                                                                               | 1.5                                                           |
| Slice gap (mm)         | 0.3                                                                           | 1.0                                                                              | 0.3                                                                             | 1.0                                                                               | 0                                                             |
| Flip angle (°)         | 142                                                                           | 142                                                                              | 142                                                                             | 90                                                                                | 12                                                            |
| Number of echoes       | 10                                                                            | 10                                                                               | 9                                                                               | 8                                                                                 | -                                                             |
| Number of slices       | 32                                                                            | 31                                                                               | 34                                                                              | 31                                                                                | 84                                                            |
| Number of excitations  | 1                                                                             | 1                                                                                | 1                                                                               | 0.5                                                                               | 1                                                             |
| Bandwidth              | 50                                                                            | 35.71                                                                            | 35.71                                                                           | 31.25                                                                             | 31.25                                                         |
| Scan time (mins)       | 2:59                                                                          | 2:55                                                                             | 4:21                                                                            | 7:51                                                                              | 15.08                                                         |

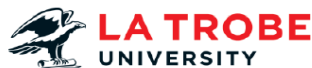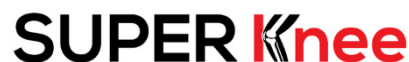

## Participant Information Sheet/Consent Form

### Interventional Study - Adult providing own consent

|                                                                    |                                                                                                                                                                                                                                                                                                                                      |
|--------------------------------------------------------------------|--------------------------------------------------------------------------------------------------------------------------------------------------------------------------------------------------------------------------------------------------------------------------------------------------------------------------------------|
| <b>Title</b>                                                       | Optimising outcomes after anterior cruciate ligament reconstruction: SUPER KNEE randomised controlled trial                                                                                                                                                                                                                          |
| <b>Short Title</b>                                                 | The SUPER KNEE trial                                                                                                                                                                                                                                                                                                                 |
| <b>Ethics Reference Number</b>                                     | HEC19447                                                                                                                                                                                                                                                                                                                             |
| <b>Project Sponsor</b>                                             | La Trobe University                                                                                                                                                                                                                                                                                                                  |
| <b>Coordinating Principal Investigator/ Principal Investigator</b> | Prof. Kay Crossley (La Trobe University)                                                                                                                                                                                                                                                                                             |
| <b>Associate Investigators</b>                                     | Dr Adam Culvenor (La Trobe University)<br>Dr Christian Barton (La Trobe University)<br>Prof. Ewa Roos (Southern Denmark University)<br>Prof. Steven McPhail (Queensland University of Technology)<br>Ass. Prof. Edwin Oei (Erasmus Medical Centre)<br>Dr Andrea Bruder (La Trobe University)<br>Mr Thomas West (La Trobe University) |
| <b>Location</b>                                                    | La Trobe University                                                                                                                                                                                                                                                                                                                  |

## Part 1 What does my participation involve?

### 1 Introduction

You are invited to take part in this research project because you have had an anterior cruciate ligament (ACL) reconstruction within the last 9-36 months. The research project aims to compare the effectiveness of two different exercise and activity monitoring programs to optimise your knee symptoms, function and activity level and maximise your quality of life.

This Participant Information Sheet/Consent Form tells you about the research project. It explains the tests and treatments involved. Knowing what is involved will help you decide if you want to take part in the research.

Please read this information carefully. Ask questions about anything that you don't understand or want to know more about. Before deciding whether or not to take part, you might want to talk about it with a relative, friend or your local doctor.

#### **Your participation is voluntary**

Participation in this research is completely voluntary and there will be no cost to you. If you don't wish to take part, you don't have to. You will receive the best possible care whether or not you take part.

If you decide to take part and later change your mind, you are free to withdraw at any stage. Your decision whether to take part or not to take part, or to take part and then withdraw, will not affect your routine treatment, your relationship with those treating you, or your relationship with La Trobe University or the hospital/orthopaedic surgeon who performed your ACL surgery.

If you decide you want to take part in the research project, you will be given a copy of this Participant Information Sheet and asked to sign the consent section. By signing it you are telling us that you:

- Understand what you have read
- Consent to take part in the research project
- Consent to have the tests and treatments that are described
- Consent to the use of your personal and health information as described.

### ***Your withdrawal from the study***

You are under no obligation to continue with the research study. You may change your mind at any time about participating in the research. People withdraw from studies for various reasons and you do not need to provide a reason.

You can withdraw from the study at any time by completing and signing the 'Participant Withdrawal of Consent Form'. This form is provided at the end of this document and is to be completed by you and supplied to the research team if you choose to withdraw at a later date.

If you withdraw from the study, you will be able to choose whether the study will destroy or retain the information it has collected about you. Information about you that has already been analysed (i.e., once you have been allocated to either exercise program), may not be able to be destroyed to ensure accurate and unbiased study reporting. Personal details collected, such as your name and contact details, can be destroyed at any time upon study withdrawal.

## **2 What is the purpose of this research?**

As you may be aware, many people who have had an ACL reconstruction do not recover to a level that they are satisfied with. Therefore, it is important to investigate treatments that can improve outcomes. The purpose of this study is to investigate whether two different exercise and activity monitoring programs can improve knee symptoms, function, physical activity and quality of life, and prevent knee arthritis. We will recruit 184 adults who have not completely recovered at 9-36 months after ACL reconstruction in Australia.

This study is being coordinated by researchers at La Trobe University. It is supported by international researchers and has been funded by an Australian National Health and Medical Research Council Project Grant. All assessments and treatment will be at **no cost** to you.

## **3 Who can participate?**

You can participate in the study if you meet all the following:

- Have had ACL reconstruction surgery 9-36 months previously
- Be aged 18-40 years at the time of your ACL reconstruction
- Have not completely recovered from your ACL reconstruction, assessed by a questionnaire (provided by the researchers)
- Willing to complete exercises 2-3 times per week

You are not eligible and cannot participate in this study if you meet any of the following:

- Have had another knee injury/surgery or knee injection in the past 3 months
- Have had physiotherapy treatment for your knee in the past 6 weeks
- Have another injury or health condition that affects your ability to perform functional tasks and exercises
- Have contraindications for MRI (e.g. pacemaker, a history of metallic foreign body in the eye, previous surgery for cerebral aneurysm, other implanted metal material other than your ACL graft or claustrophobia)
- Currently pregnant or breastfeeding
- Planning on relocating interstate or overseas in the next 18 months or unable to commit to the various study assessments over the next 18 months (as detailed below)
- Unable to understand written and/or spoken English

#### 4 What does participation in this research involve?

If you agree to participate in this study, you will be asked to sign the participant consent form before any study assessments are performed. This study will be conducted over 18 months in total (see flowchart on next page).

##### ***A comprehensive knee assessment by a physiotherapist***

For the first assessment at the start of the study, you will attend La Trobe University. At this testing session you should allow approximately 2 hours, where you will undergo a physical examination by a physiotherapist. You will be asked to wear shorts and a small piece of stocking (provided) over both of your knees during some tests so that the examiner is unable to tell which knee is your operated one. The tests conducted in the physical examination will include a measure of knee movement and joint swelling, activities including squatting and hopping, and measures of muscle strength (quadriceps and hamstrings). Muscle strength will be assessed using a special chair and you will be asked to push up and down a few times against an ankle pad as hard as you can. We will also measure and record your height, weight and waist circumference. We will video your performance during clinical tests (e.g. single-leg squat and jump). These videos will not include your face, so you cannot be identified from the footage. If any of your face (or other identifying feature) is inadvertently videoed, this will be masked (by electronically blurring the area) prior to data analysis.

You will also be asked to complete a series of questionnaires related to pain, physical function, confidence with physical movements and physical activity, as well as details about your knee injury/pain (e.g. injury mechanism, location of pain; history of pain). These may be completed in person at the testing session or online via link provided by email.

If you are interested, you may also undergo a 3D biomechanics assessment at the La Trobe University gait laboratory. This is optional and takes an additional 30-60mins. Small reflective skin markers will be attached to your skin (with tape on arms, pelvis, legs) and tracked with infrared cameras when you walk, run and perform hopping tasks.

##### ***A knee MRI***

You will also attend Lake Imaging Specialist and Research Centre, North Melbourne (within 1-week of your assessment at La Trobe University) where you will have a magnetic resonance imaging (MRI) scan of your reconstructed and possibly your other knee (if uninjured). For the MRI scan you will be asked to lie on a narrow table that can slide inside a large tunnel-like tube with a scanner. The scanner creates a magnetic field around you, then pulses radio waves at the knee. This does not contain any radiation. It is very important that you keep very still during the scanning. All imaging will be provided at **no cost** to you and will take approximately 25-45 mins to complete.

##### ***Random assignment to one of two different treatments***

At the end of the first assessment at La Trobe University you will be randomly assigned (50:50 chance, like a coin toss) by a computer system to receive one of the exercise and activity monitoring programs provided by physiotherapists to increase lower-limb muscle strength, power, endurance and agility. This means neither you or the researchers will be able to choose which group you are assigned to. We do not know which treatment is best. To find out we need to compare the different treatments. There is equal chance that you will receive either treatment. All treatment will be at **no cost** to you.

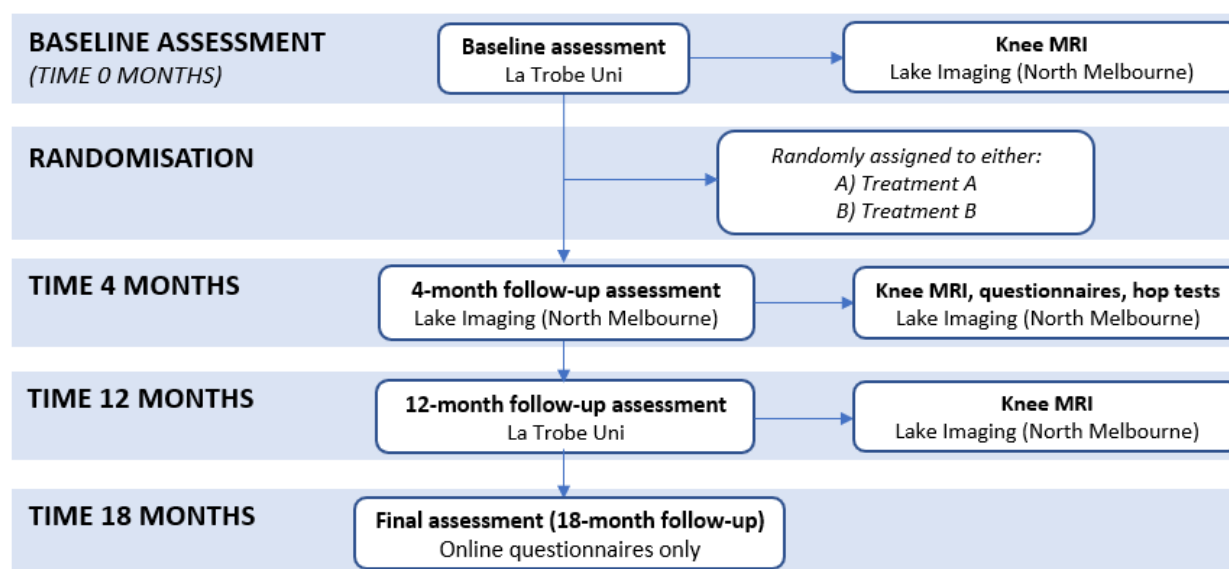

**Figure 1. Flowchart of study assessments**

If you are randomised to receive **Treatment A**, you will receive a “best-practice guide” booklet and a face-to-face appointment with a physiotherapist to explain the exercises and education in the booklet. Your physical activity and sports participation will be monitored with fortnightly (for first 4 months) and monthly (after first 4 months) online questionnaires. You will also be provided with an activity monitor (Garmin™ watch) to count your steps.

If you are randomised to receive **Treatment B**, you will receive 2 x per week face-to-face appointments for 4 months with a physiotherapist to perform muscle strength and agility/balance exercises. We have trained physiotherapists at clinics throughout Melbourne and Victoria to be convenient for you to attend. We will offer reimbursement for travel costs to attend each local physiotherapy appointment. You will have the option to access a gym (located conveniently for you and at no cost) at the 4-month assessment to continue to perform strengthening exercises up to 12-months after baseline. We will monitor your physical activity in the same way, and you will also get a physical activity monitor (Garmin™ watch) to measure your daily step count.

### **Follow-up assessments**

At 4-months after baseline assessment, the same assessments will be repeated (questionnaires, hop tests and MRI) at Lake Imaging Specialist and Research Centre, North Melbourne and La Trobe University. At 12-months after baseline assessment, all assessments will be repeated: questionnaires, physical examination at La Trobe University, and MRI at Lake Imaging Specialist and Research Centre, North Melbourne. At completion of the study (18-months after baseline), the same online questionnaires will be repeated only.

There are no additional costs associated with participating in this research project. All medical care required as part of the research project will be provided free of charge. Your travel costs to attend the assessments will be reimbursed up to \$100.

## **5 What else do I have to do?**

In addition to the assessments conducted at baseline, 4-, 12- and 18-months, you will be asked to record the exercises you have completed in a log book. You will also be asked to record any other healthcare treatments you receive during the study. This will be recorded in the fortnightly/monthly online questionnaire. You will otherwise be able to carry on with your normal lifestyle. It is also important for us to know about your surgical details (e.g. technique, cartilage/meniscus treatment), so we will request to access your surgical notes.

At the end of the first 4 months, or after 12 months, we may also ask if you are willing to have a separate interview with one of the study researchers. The purpose of this interview is to seek

feedback on the study interventions, satisfaction with the process received and whether there are any suggestions for improvement. The interview will take approximately 30 minutes, but you can cease the interview at any time. To ensure responses are correctly interpreted, responses to questions will be audio recorded and transcribed. Audio recording transcriptions will be completed by 'Transcription Australia' on their secure, encrypted Australian-based software. Although voice in your audio recording could lead to your identification, this file will not be used during analysis. Instead a re-identifiable transcription, which you will have the opportunity to check for accuracy, will be used for analysis. Re-identifiable means that we will use a code number and not your name on data collected to ensure your anonymity. Following the completion of analysis of this transcription, the audio file associated with your interview will be deleted. After analysis, overall findings and conclusions from all interviews will also be sent to you, to allow an opportunity to make any further comments. We will seek around 40 participants to be interviewed (n=30 at 4 months, and n=30 at 12 months). It is your decision or not whether you wish to be interviewed.

## 6 What are the alternatives to participation?

You do not have to take part in this research project to receive treatment for your knee. Other options are available; these include attending physiotherapy (in a private practice or via the public hospital system). The research team will discuss these options with you before you decide whether or not to take part in this research project. You can also discuss the options with your surgeon, local doctor or physiotherapist.

## 7 What are the possible benefits of taking part?

We cannot guarantee or promise that you will receive any benefits from this research. However, possible benefits may include improved symptoms, function, quality of life, physical and sports activity, and confidence in your knee. You may also gain valuable insight into your physical functioning of your knee joint.

## 8 What are the possible risks and disadvantages of taking part?

The testing procedures and exercise-therapy treatments may cause side effects. You may have none, some or all of the effects listed below, and they may be mild, moderate or severe. If you have any of these side effects, or are worried about them, talk with the study coordinator.

| Possible Side Effect                                                                    | How often is it likely to occur?                                                                                  | How severe might it be?                                                                       | How long might it last?          |
|-----------------------------------------------------------------------------------------|-------------------------------------------------------------------------------------------------------------------|-----------------------------------------------------------------------------------------------|----------------------------------|
| <i>Muscle soreness</i>                                                                  | Commonly, after testing; or after a change in exercises                                                           | Muscle may be tender to touch, may notice pain when using muscles (e.g. going up/down stairs) | May last 2-3 days                |
| <i>Increase in knee pain or swelling</i>                                                | Rarely after testing; Rarely after exercise-therapy if instructions followed                                      | Mild<br>Moderate<br>Severe                                                                    | 2-3 days<br>3-7 days<br>> 1 week |
| <i>Re-injury (e.g. rupture of ACL graft), or injury to opposite knee (or ankle/hip)</i> | Extremely rare during testing or exercise (research team are only aware of 1 incident in 20+ years in this field) | Mild to severe                                                                                | Depends on injury – maybe months |

1  
2  
3  
4  
5  
6  
7  
8  
9  
10  
11  
12  
13  
14  
15  
16  
17  
18  
19  
20  
21  
22  
23  
24  
25  
26  
27  
28  
29  
30  
31  
32  
33  
34  
35  
36  
37  
38  
39  
40  
41  
42  
43  
44  
45  
46  
47  
48  
49  
50  
51  
52  
53  
54  
55  
56  
57  
58  
59  
60

There may be side effects that the researchers do not expect or do not know about and that may be serious. Tell the researchers immediately if you get any new or unusual symptoms. Most side effects go away shortly after treatment ends. If a severe side effect or reaction occurs, the study coordinator may need to stop your treatment. The study coordinator will discuss the best way of managing any side effects with you.

### *Muscle and joint soreness*

The physical tests and exercises represent usual examination and intervention by a physiotherapist. You may experience a small amount of discomfort in the joints or muscles. Please report to the researcher any discomfort or pain experienced during the testing or exercises. If the pain or discomfort is deemed to be excessive by yourself or the investigators, the testing/treatment will cease.

### *Re-injury*

There is a very slight risk of falling during the hopping tasks. During the physical tests and exercises, there is also an extremely low risk of re-injuring your ACL reconstructed knee. During the first 5 years after ACL reconstruction, approximately 5% of people will re-rupture their ACL graft, with almost all of these occurring during sport. To minimise the risk of graft rupture, an experienced physiotherapist will conduct all testing, and you can choose to not perform tests if you are not confident to do so. The exercises have been designed using the best available research, and you will be provided with criteria to appropriately progress the difficulty of exercises to minimise re-injury risk. In particular, before attempting sport, we strongly recommend approval from your surgeon and possibly a return to sport assessment by a health professional.

### *Magnetic Resonance Imaging (MRI)*

When you lie in the MRI machine, the MRI team will make sure you are in a comfortable position so you can keep still. The scanner is very noisy and they can give you some earphones to reduce the noise. Some people may experience symptoms of claustrophobia from lying in a confined space. If you do experience discomfort at any time during the scan, you will be able to alert staff by pressing on a call button provided to you.

There are no proven long-term risks related to MRI scans. MRI is considered safe when performed at a centre with appropriate procedures. However, the magnetic attraction for some metal objects can pose a safety risk, so it is important that metal objects are not taken into the scanner room.

The MRI team will examine you to make sure there is no reason for you not to have the scan. You must tell them if you have metal implanted in your body, such as a pacemaker or metal pins.

The scans we are taking are for research purposes. They are not intended to be used like scans taken for a full clinical examination. The scans will not be used to help diagnose, treat or manage a particular condition. A specialist will look at your MRI scans for features relevant to the research project. This may be done by specialists we work with overseas – all identifying information (name, date of birth etc) will be removed from your MRI scans prior to analysis so that you will not be able to be identified. On rare occasions, the specialist may find an unusual feature that could have a significant risk to your health. If this happens, we will contact you and/or your health practitioner to talk about the findings. We cannot guarantee that we will find any/all unusual features. The MRI team will provide you with a copy of your MRI scans.

## **9 Can I have other treatments during this research project?**

While you are participating in this research project, you should not participate in alternative or additional exercise-therapy (or physiotherapy). It is important to tell the study co-ordinator about any treatments or medications you may be taking, including over-the-counter medications, vitamins or herbal remedies, acupuncture or other alternative treatments. We prefer that you do not commence any new treatment during the research project. However, should you decide to do so, we require you to describe any treatments (including medications) in your “study log book”.



## 10 What happens when the research project ends?

At the completion of the research project, there will be no additional treatment provided by our research team. If you wish to continue with your exercise-therapy treatment, you can continue to use the resources provided to you. Any additional treatment (e.g. physiotherapy) that you might require at the completion of the research project will be at your own cost. If requested, we will provide you with your individual results and whole study results. We, or other researchers, may also use coded information (so that you cannot be identified) collected for this research study in future related studies. If you consent (tick the box on the consent form) to be contacted for future related research, we will store your contact details (name, address, phone number, email) on the secure La Trobe University research drive, only accessible to members of the research team, and may contact you about future related research projects.

## Part 2 How is the research project being conducted?

### 11 What will happen to information about me?

By signing the consent form you agree to the relevant research staff collecting and using personal information about you for the research project. Any information obtained in connection with this research project that can identify you will remain confidential and securely stored. It will be disclosed only with your permission, or in compliance with the law.

The research staff will also collect information on the health services you have used for the 6 months before, and 18 months after, baseline assessment. To collect this information, identifiable data (e.g. name, age, address) will be submitted to the Department of Human Services so that information about your health service usage can be obtained from a range of health datasets (e.g. Medicare Benefits Schedule (MBS), Pharmaceutical Benefits Scheme (PBS)) and linked to your study data. The health service data will be provided to the research team, by the Department of Human Services, in a format where your identifiable data (e.g. name, address) has been removed and the anonymous data will be held and analysed within a Department of Human Services approved, secure data storage environment. This information will be used solely for this project.

You will be asked to sign a consent form authorising the study to access your complete MBS and PBS data as outlined in the consent form. Medicare collects information on your doctor visits and the associated costs, while the PBS collects information on the prescription medications you have filled at pharmacies. The consent form is sent securely to the Department of Human Services who holds MBS and PBS data confidentially.

#### ***Storage, retention and destruction***

The anonymity of your participation is assured with our procedure, in which a code number and not your name will identify you. Data will be kept securely at La Trobe University in a locked filing cabinet and password protected research computer. Re-identifiable (i.e. coded) information will also be kept to link your health service utilisation. Identifiable data will be stored for 15 years, after which time it will be securely destroyed (electronic records deleted, and paper-files shredded). All data and results will be handled in a strictly confidential manner, under guidelines set out by the National Health and Medical Research Council. The principal investigator (Professor Kay Crossley) is responsible for maintaining this confidentiality.

Information about you may be obtained from your health records held at health services for the purpose of this research. By signing the consent form you agree to the study team accessing health records if they are relevant to your participation in this research project.

In accordance with relevant Australian and/or Victorian privacy and other relevant laws, you have the right to request access to your information collected and stored by the research team. You also have the right to request that any information with which you disagree be corrected. Please contact the study member named below if you would like to access your information.

1  
2  
3  
4  
5  
6  
7  
8  
9  
10  
11  
12  
13  
14  
15  
16  
17  
18  
19  
20  
21  
22  
23  
24  
25  
26  
27  
28  
29  
30  
31  
32  
33  
34  
35  
36  
37  
38  
39  
40  
41  
42  
43  
44  
45  
46  
47  
48  
49  
50  
51  
52  
53  
54  
55  
56  
57  
58  
59  
60

It is anticipated that the results of this research project will be published and/or presented in a variety of forums and may be used by research higher degree students to obtain a research degree. In any publication, presentation or data files shared with other researchers, information will be provided in such a way that you cannot be identified, except with your permission. Any personal information that could identify you will be removed or changed before files are shared with other researchers.

## 12 What happens if I am injured as a result of participating in this research project?

If you suffer any injuries or complications as a result of this research project, you should contact the study team as soon as possible. You will be assisted with arranging appropriate medical treatment. If you are eligible for Medicare, you can receive medical treatment required to treat the injury or complication, free of charge, as a public patient in any Australian public hospital. Waiting lists may apply and you may not see the surgeon who performed your original ACL reconstruction. In the first instance your study physiotherapist and/or research team will evaluate your condition and then discuss treatment with both you and your regular health practitioner. In the event of loss or injury, any question about compensation must initially be directed to the research team who will advise the university insurer of the matter.

## 13 Who is organising and funding the research?

This research project is being conducted by Professor Kay Crossley and a team of national and international researchers. It has been funded by an Australian National Health and Medical Research Council Project Grant. No member of the research team will receive a personal financial benefit from your involvement in this research project (other than their ordinary wages).

## 14 Who has reviewed the research project?

All research in Australia involving humans is reviewed by an independent group of people called a Human Research Ethics Committee (HREC). The ethical aspects of this research project have been approved by the HREC of La Trobe University and the Alfred Hospital Ethics Committee.

This project will be carried out according to the *National Statement on Ethical Conduct in Human Research (2018)*. This statement has been developed to protect the interests of people who agree to participate in human research studies.

## 15 Further information and who to contact

The person you may need to contact will depend on the nature of your query. For all enquiries, you can contact the Clinical Trial Manager, during business hours:

Dr Adam Culvenor, Research Fellow in Physiotherapy, La Trobe University  
Tel: 03 9479 5116; E-mail: [a.culvenor@latrobe.edu.au](mailto:a.culvenor@latrobe.edu.au)

If you have any medical problems which may be related to your involvement in the project (for example, any side effects), the number to call Dr Adam Culvenor after hours is: 0401390974.

If you have any complaints about any aspect of the project, the way it is being conducted or any questions about being a research participant in general, then you may contact:

Reviewing HREC: La Trobe University Human Research Ethics Committee  
Complaints Contact: Senior Human Ethics Officer, Ethics and Integrity, Research Office  
Telephone: 03 9479 1443 E-mail: [humanethics@latrobe.edu.au](mailto:humanethics@latrobe.edu.au)

\* Please quote the application reference number HEC19447.

## Consent Form - *Adult providing own consent*

|                                                                        |                                                                                                                                                                  |
|------------------------------------------------------------------------|------------------------------------------------------------------------------------------------------------------------------------------------------------------|
| <b>Title</b>                                                           | Optimising outcomes after anterior cruciate ligament reconstruction: SUPER KNEE randomised controlled trial                                                      |
| <b>Short Title</b>                                                     | The SUPER KNEE trial                                                                                                                                             |
| <b>Ethics Reference Number</b>                                         | HEC19447                                                                                                                                                         |
| <b>Project Sponsor</b>                                                 | La Trobe University                                                                                                                                              |
| <b>Coordinating Principal Investigator/<br/>Principal Investigator</b> | Professor Kay Crossley                                                                                                                                           |
| <b>Associate Investigator(s)</b>                                       | Dr Adam Culvenor<br>Dr Christian Barton<br>Professor Ewa Roos<br>Professor Steven McPhail<br>Associate Professor Edwin Oei<br>Dr Andrea Bruder<br>Mr Thomas West |
| <b>Location</b>                                                        | La Trobe University                                                                                                                                              |

### **Consent Agreement**

I have read the Participant Information Sheet and I understand the purposes, procedures and risks of the research described in the project.

Information about you may be obtained from your health records held at health services for the purpose of this research. I give permission for my doctors, other health professionals, hospitals or laboratories outside this hospital to release information to La Trobe University concerning my knee injury and treatment for the purposes of this project. I understand that such information will remain confidential.

I understand that data files may be shared with other researchers, and that information will be provided in such a way that I cannot be identified, except with my permission.

I have had an opportunity to ask questions and I am satisfied with the answers I have received. I freely agree to participate in this research project as described and understand that I am free to withdraw at any time during the study without affecting my future health care.

At the end of the first 4 months, or after 12 months, you will be asked if you are willing to have a separate recorded interview with one of the study researchers for the purposes of seeking feedback.

- I agree to participate in a recorded interview  
 I do not agree to participate in a recorded interview

I understand that, if I decide to discontinue the study treatment, I may be asked to attend follow-up visits to allow collection of information regarding my health status. I agree that data gathered for the study may be published provided my name or other identifying information is not used.

- I wish to receive results of the study                       I do not wish to receive results of the study
- I consent to be contacted for future related research  
 I do not consent to be contacted for future related research

I understand that I will be given a signed copy of this document to keep.

Name of Participant (please print) \_\_\_\_\_

Signature \_\_\_\_\_ Date \_\_\_\_\_

1 **Declaration by Researcher†**  
2

3 I have given a verbal explanation of the research project, its procedures and risks and I believe  
4 that the participant has understood that explanation.  
5

6 Name of Researcher† (please print) \_\_\_\_\_  
7

8 Signature \_\_\_\_\_ Date \_\_\_\_\_  
9

10 † A member of the research team must provide the explanation of, and information concerning, the research project.  
11

12 Note: All parties signing the consent section must date their own signature.  
13  
14  
15  
16  
17  
18  
19  
20  
21  
22  
23  
24  
25  
26  
27  
28  
29  
30  
31  
32  
33  
34  
35  
36  
37  
38  
39  
40  
41  
42  
43  
44  
45  
46  
47  
48  
49  
50  
51  
52  
53  
54  
55  
56  
57  
58  
59  
60

For peer review only

## Form for Withdrawal of Participation - *Adult providing own consent*

**Title** Optimising outcomes after anterior cruciate ligament reconstruction: SUPER KNEE randomised controlled trial

**Short Title** The SUPER KNEE trial

**Ethics Reference Number** HEC19447

**Project Sponsor** La Trobe University

**Coordinating Principal Investigator/  
Principal Investigator** Professor Kay Crossley

**Associate Investigator(s)** Dr Adam Culvenor  
Dr Christian Barton  
Professor Ewa Roos  
Professor Steven McPhail  
Associate Professor Edwin Oei  
Dr Andrea Bruder  
Mr Thomas West

**Location** La Trobe University

### Declaration by Participant

I wish to withdraw from participation in the above research project and understand that such withdrawal will not affect my routine treatment, my access to Health Services or Government benefits, my relationship with those treating me or my relationship with La Trobe University or the health system where I had my knee surgery. I understand that no further information about me will be collected for the study from the withdrawal date. I understand that information about me that has already been analysed and/or included in a publication by the study, may not be able to be destroyed. I request that the study handles the information they have collected about me in the following way (choose one option):

- DESTROY all my information collected so it can no longer be used for research
- RETAIN all my information collected so it can be used for research

Name of Participant (please print) \_\_\_\_\_

Signature \_\_\_\_\_ Date \_\_\_\_\_

*In the event that the participant's decision to withdraw is communicated verbally, the Researcher will need to provide a description of the circumstances below.*

Date:  
Time:

1  
2  
3  
4  
5  
6  
7  
8  
9  
10  
11  
12  
13  
14  
15  
16  
17  
18  
19  
20  
21  
22  
23  
24  
25  
26  
27  
28  
29  
30  
31  
32  
33  
34  
35  
36  
37  
38  
39  
40  
41  
42  
43  
44  
45  
46  
47  
48  
49  
50  
51  
52  
53  
54  
55  
56  
57  
58  
59  
60**Declaration by Researcher†**

I have given a verbal explanation of the implications of withdrawal from the research project and I believe that the participant has understood that explanation.

Name of Researcher† (please print) \_\_\_\_\_

Signature \_\_\_\_\_ Date \_\_\_\_\_

† A member of the research team must provide the explanation of and information concerning withdrawal from the research project.

Note: All parties signing the consent section must date their own signature.

For peer review only

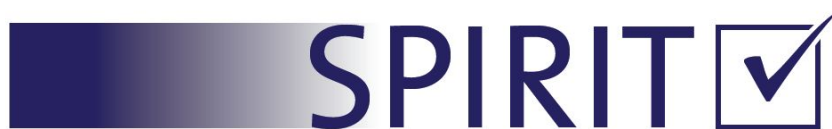

STANDARD PROTOCOL ITEMS: RECOMMENDATIONS FOR INTERVENTIONAL TRIALS

SPIRIT 2013 Checklist: Recommended items to address in a clinical trial protocol and related documents\*

| Section/item                                              | Item No | Description                                                                                                                                                                                                                                                                              |                     |
|-----------------------------------------------------------|---------|------------------------------------------------------------------------------------------------------------------------------------------------------------------------------------------------------------------------------------------------------------------------------------------|---------------------|
| <b>Administrative information</b>                         |         |                                                                                                                                                                                                                                                                                          |                     |
| Title                                                     | 1       | Descriptive title identifying the study design, population, interventions, and, if applicable, trial acronym                                                                                                                                                                             | 1                   |
| Trial registration                                        | 2a      | Trial identifier and registry name. If not yet registered, name of intended registry                                                                                                                                                                                                     | 3                   |
|                                                           | 2b      | All items from the World Health Organization Trial Registration Data Set                                                                                                                                                                                                                 | ACTRN12620001164987 |
| Protocol version                                          | 3       | Date and version identifier                                                                                                                                                                                                                                                              | NA                  |
| Funding                                                   | 4       | Sources and types of financial, material, and other support                                                                                                                                                                                                                              | 23                  |
| Roles and responsibilities                                | 5a      | Names, affiliations, and roles of protocol contributors                                                                                                                                                                                                                                  | 23                  |
|                                                           | 5b      | Name and contact information for the trial sponsor                                                                                                                                                                                                                                       | 1                   |
|                                                           | 5c      | Role of study sponsor and funders, if any, in study design; collection, management, analysis, and interpretation of data; writing of the report; and the decision to submit the report for publication, including whether they will have ultimate authority over any of these activities | 23                  |
|                                                           | 5d      | Composition, roles, and responsibilities of the coordinating centre, steering committee, endpoint adjudication committee, data management team, and other individuals or groups overseeing the trial, if applicable (see Item 21a for data monitoring committee)                         | NA                  |
| <b>Introduction</b>                                       |         |                                                                                                                                                                                                                                                                                          |                     |
| Background and rationale                                  | 6a      | Description of research question and justification for undertaking the trial, including summary of relevant studies (published and unpublished) examining benefits and harms for each intervention                                                                                       | 4                   |
|                                                           | 6b      | Explanation for choice of comparators                                                                                                                                                                                                                                                    | 4-5                 |
| Objectives                                                | 7       | Specific objectives or hypotheses                                                                                                                                                                                                                                                        | 5                   |
| Trial design                                              | 8       | Description of trial design including type of trial (eg, parallel group, crossover, factorial, single group), allocation ratio, and framework (eg, superiority, equivalence, noninferiority, exploratory)                                                                                | 5-6                 |
| <b>Methods: Participants, interventions, and outcomes</b> |         |                                                                                                                                                                                                                                                                                          |                     |

|    |                      |     |                                                                                                                                                                                                                                                                                                                                                                                |                                |
|----|----------------------|-----|--------------------------------------------------------------------------------------------------------------------------------------------------------------------------------------------------------------------------------------------------------------------------------------------------------------------------------------------------------------------------------|--------------------------------|
| 1  |                      |     |                                                                                                                                                                                                                                                                                                                                                                                |                                |
| 2  |                      |     |                                                                                                                                                                                                                                                                                                                                                                                |                                |
| 3  |                      |     |                                                                                                                                                                                                                                                                                                                                                                                |                                |
| 4  | Study setting        | 9   | Description of study settings (eg, community clinic, academic hospital) and list of countries where data will be collected. Reference to where list of study sites can be obtained                                                                                                                                                                                             | 6                              |
| 5  |                      |     |                                                                                                                                                                                                                                                                                                                                                                                |                                |
| 6  |                      |     |                                                                                                                                                                                                                                                                                                                                                                                |                                |
| 7  | Eligibility criteria | 10  | Inclusion and exclusion criteria for participants. If applicable, eligibility criteria for study centres and individuals who will perform the interventions (eg, surgeons, psychotherapists)                                                                                                                                                                                   | 6                              |
| 8  |                      |     |                                                                                                                                                                                                                                                                                                                                                                                |                                |
| 9  |                      |     |                                                                                                                                                                                                                                                                                                                                                                                |                                |
| 10 |                      |     |                                                                                                                                                                                                                                                                                                                                                                                |                                |
| 11 | Interventions        | 11a | Interventions for each group with sufficient detail to allow replication, including how and when they will be administered                                                                                                                                                                                                                                                     | 8-13, Table 2, Supplementary 1 |
| 12 |                      |     |                                                                                                                                                                                                                                                                                                                                                                                |                                |
| 13 |                      | 11b | Criteria for discontinuing or modifying allocated interventions for a given trial participant (eg, drug dose change in response to harms, participant request, or improving/worsening disease)                                                                                                                                                                                 | Table 2                        |
| 14 |                      |     |                                                                                                                                                                                                                                                                                                                                                                                |                                |
| 15 |                      |     |                                                                                                                                                                                                                                                                                                                                                                                |                                |
| 16 |                      |     |                                                                                                                                                                                                                                                                                                                                                                                |                                |
| 17 |                      | 11c | Strategies to improve adherence to intervention protocols, and any procedures for monitoring adherence (eg, drug tablet return, laboratory tests)                                                                                                                                                                                                                              | 8-13, Table 2                  |
| 18 |                      |     |                                                                                                                                                                                                                                                                                                                                                                                |                                |
| 19 |                      |     |                                                                                                                                                                                                                                                                                                                                                                                |                                |
| 20 |                      |     |                                                                                                                                                                                                                                                                                                                                                                                |                                |
| 21 |                      | 11d | Relevant concomitant care and interventions that are permitted or prohibited during the trial                                                                                                                                                                                                                                                                                  | 13                             |
| 22 |                      |     |                                                                                                                                                                                                                                                                                                                                                                                |                                |
| 23 | Outcomes             | 12  | Primary, secondary, and other outcomes, including the specific measurement variable (eg, systolic blood pressure), analysis metric (eg, change from baseline, final value, time to event), method of aggregation (eg, median, proportion), and time point for each outcome. Explanation of the clinical relevance of chosen efficacy and harm outcomes is strongly recommended | 14-18, Table 3                 |
| 24 |                      |     |                                                                                                                                                                                                                                                                                                                                                                                |                                |
| 25 |                      |     |                                                                                                                                                                                                                                                                                                                                                                                |                                |
| 26 |                      |     |                                                                                                                                                                                                                                                                                                                                                                                |                                |
| 27 |                      |     |                                                                                                                                                                                                                                                                                                                                                                                |                                |
| 28 |                      |     |                                                                                                                                                                                                                                                                                                                                                                                |                                |
| 29 | Participant timeline | 13  | Time schedule of enrolment, interventions (including any run-ins and washouts), assessments, and visits for participants. A schematic diagram is highly recommended (see Figure)                                                                                                                                                                                               | Figure 1                       |
| 30 |                      |     |                                                                                                                                                                                                                                                                                                                                                                                |                                |
| 31 |                      |     |                                                                                                                                                                                                                                                                                                                                                                                |                                |
| 32 |                      |     |                                                                                                                                                                                                                                                                                                                                                                                |                                |
| 33 | Sample size          | 14  | Estimated number of participants needed to achieve study objectives and how it was determined, including clinical and statistical assumptions supporting any sample size calculations                                                                                                                                                                                          | 19                             |
| 34 |                      |     |                                                                                                                                                                                                                                                                                                                                                                                |                                |
| 35 |                      |     |                                                                                                                                                                                                                                                                                                                                                                                |                                |
| 36 |                      |     |                                                                                                                                                                                                                                                                                                                                                                                |                                |
| 37 | Recruitment          | 15  | Strategies for achieving adequate participant enrolment to reach target sample size                                                                                                                                                                                                                                                                                            | 6-7                            |
| 38 |                      |     |                                                                                                                                                                                                                                                                                                                                                                                |                                |

### Methods: Assignment of interventions (for controlled trials)

#### Allocation:

|    |                                  |     |                                                                                                                                                                                                                                                                                                                                                          |     |
|----|----------------------------------|-----|----------------------------------------------------------------------------------------------------------------------------------------------------------------------------------------------------------------------------------------------------------------------------------------------------------------------------------------------------------|-----|
| 41 |                                  |     |                                                                                                                                                                                                                                                                                                                                                          |     |
| 42 |                                  |     |                                                                                                                                                                                                                                                                                                                                                          |     |
| 43 | Sequence generation              | 16a | Method of generating the allocation sequence (eg, computer-generated random numbers), and list of any factors for stratification. To reduce predictability of a random sequence, details of any planned restriction (eg, blocking) should be provided in a separate document that is unavailable to those who enrol participants or assign interventions | 7-8 |
| 44 |                                  |     |                                                                                                                                                                                                                                                                                                                                                          |     |
| 45 |                                  |     |                                                                                                                                                                                                                                                                                                                                                          |     |
| 46 |                                  |     |                                                                                                                                                                                                                                                                                                                                                          |     |
| 47 |                                  |     |                                                                                                                                                                                                                                                                                                                                                          |     |
| 48 |                                  |     |                                                                                                                                                                                                                                                                                                                                                          |     |
| 49 | Allocation concealment mechanism | 16b | Mechanism of implementing the allocation sequence (eg, central telephone; sequentially numbered, opaque, sealed envelopes), describing any steps to conceal the sequence until interventions are assigned                                                                                                                                                | 7-8 |
| 50 |                                  |     |                                                                                                                                                                                                                                                                                                                                                          |     |
| 51 |                                  |     |                                                                                                                                                                                                                                                                                                                                                          |     |
| 52 |                                  |     |                                                                                                                                                                                                                                                                                                                                                          |     |
| 53 |                                  |     |                                                                                                                                                                                                                                                                                                                                                          |     |
| 54 | Implementation                   | 16c | Who will generate the allocation sequence, who will enrol participants, and who will assign participants to interventions                                                                                                                                                                                                                                | 7-8 |
| 55 |                                  |     |                                                                                                                                                                                                                                                                                                                                                          |     |
| 56 | Blinding (masking)               | 17a | Who will be blinded after assignment to interventions (eg, trial participants, care providers, outcome assessors, data analysts), and how                                                                                                                                                                                                                | 7-8 |
| 57 |                                  |     |                                                                                                                                                                                                                                                                                                                                                          |     |
| 58 |                                  |     |                                                                                                                                                                                                                                                                                                                                                          |     |
| 59 |                                  |     |                                                                                                                                                                                                                                                                                                                                                          |     |
| 60 |                                  |     |                                                                                                                                                                                                                                                                                                                                                          |     |



1  
2  
3  
4  
5  
6  
7  
8  
9  
10  
11  
12  
13  
14  
15  
16  
17  
18  
19  
20  
21  
22  
23  
24  
25  
26  
27  
28  
29  
30  
31  
32  
33  
34  
35  
36  
37  
38  
39  
40  
41  
42  
43  
44  
45  
46  
47  
48  
49  
50  
51  
52  
53  
54  
55  
56  
57  
58  
59  
60

|  |     |                                                                                                                                                      |    |
|--|-----|------------------------------------------------------------------------------------------------------------------------------------------------------|----|
|  | 17b | If blinded, circumstances under which unblinding is permissible, and procedure for revealing a participant's allocated intervention during the trial | NA |
|--|-----|------------------------------------------------------------------------------------------------------------------------------------------------------|----|

### Methods: Data collection, management, and analysis

|                         |     |                                                                                                                                                                                                                                                                                                                                                                                                              |    |
|-------------------------|-----|--------------------------------------------------------------------------------------------------------------------------------------------------------------------------------------------------------------------------------------------------------------------------------------------------------------------------------------------------------------------------------------------------------------|----|
| Data collection methods | 18a | Plans for assessment and collection of outcome, baseline, and other trial data, including any related processes to promote data quality (eg, duplicate measurements, training of assessors) and a description of study instruments (eg, questionnaires, laboratory tests) along with their reliability and validity, if known. Reference to where data collection forms can be found, if not in the protocol | 13 |
|                         | 18b | Plans to promote participant retention and complete follow-up, including list of any outcome data to be collected for participants who discontinue or deviate from intervention protocols                                                                                                                                                                                                                    | 13 |
| Data management         | 19  | Plans for data entry, coding, security, and storage, including any related processes to promote data quality (eg, double data entry; range checks for data values). Reference to where details of data management procedures can be found, if not in the protocol                                                                                                                                            | 19 |
| Statistical methods     | 20a | Statistical methods for analysing primary and secondary outcomes. Reference to where other details of the statistical analysis plan can be found, if not in the protocol                                                                                                                                                                                                                                     | 20 |
|                         | 20b | Methods for any additional analyses (eg, subgroup and adjusted analyses)                                                                                                                                                                                                                                                                                                                                     | 20 |
|                         | 20c | Definition of analysis population relating to protocol non-adherence (eg, as randomised analysis), and any statistical methods to handle missing data (eg, multiple imputation)                                                                                                                                                                                                                              | 20 |

### Methods: Monitoring

|                 |     |                                                                                                                                                                                                                                                                                                                                       |       |
|-----------------|-----|---------------------------------------------------------------------------------------------------------------------------------------------------------------------------------------------------------------------------------------------------------------------------------------------------------------------------------------|-------|
| Data monitoring | 21a | Composition of data monitoring committee (DMC); summary of its role and reporting structure; statement of whether it is independent from the sponsor and competing interests; and reference to where further details about its charter can be found, if not in the protocol. Alternatively, an explanation of why a DMC is not needed | 19    |
|                 | 21b | Description of any interim analyses and stopping guidelines, including who will have access to these interim results and make the final decision to terminate the trial                                                                                                                                                               | 19-20 |
| Harms           | 22  | Plans for collecting, assessing, reporting, and managing solicited and spontaneously reported adverse events and other unintended effects of trial interventions or trial conduct                                                                                                                                                     | 18-19 |
| Auditing        | 23  | Frequency and procedures for auditing trial conduct, if any, and whether the process will be independent from investigators and the sponsor                                                                                                                                                                                           | NA    |

### Ethics and dissemination

|                          |    |                                                                                           |    |
|--------------------------|----|-------------------------------------------------------------------------------------------|----|
| Research ethics approval | 24 | Plans for seeking research ethics committee/institutional review board (REC/IRB) approval | 22 |
|--------------------------|----|-------------------------------------------------------------------------------------------|----|

|                               |     |                                                                                                                                                                                                                                                                                     |                 |
|-------------------------------|-----|-------------------------------------------------------------------------------------------------------------------------------------------------------------------------------------------------------------------------------------------------------------------------------------|-----------------|
| Protocol amendments           | 25  | Plans for communicating important protocol modifications (eg, changes to eligibility criteria, outcomes, analyses) to relevant parties (eg, investigators, REC/IRBs, trial participants, trial registries, journals, regulators)                                                    | 22              |
| Consent or assent             | 26a | Who will obtain informed consent or assent from potential trial participants or authorised surrogates, and how (see Item 32)                                                                                                                                                        | 22              |
|                               | 26b | Additional consent provisions for collection and use of participant data and biological specimens in ancillary studies, if applicable                                                                                                                                               | NA              |
| Confidentiality               | 27  | How personal information about potential and enrolled participants will be collected, shared, and maintained in order to protect confidentiality before, during, and after the trial                                                                                                | 19              |
| Declaration of interests      | 28  | Financial and other competing interests for principal investigators for the overall trial and each study site                                                                                                                                                                       | 23-24           |
| Access to data                | 29  | Statement of who will have access to the final trial dataset, and disclosure of contractual agreements that limit such access for investigators                                                                                                                                     | Supplementary 6 |
| Ancillary and post-trial care | 30  | Provisions, if any, for ancillary and post-trial care, and for compensation to those who suffer harm from trial participation                                                                                                                                                       | NA              |
| Dissemination policy          | 31a | Plans for investigators and sponsor to communicate trial results to participants, healthcare professionals, the public, and other relevant groups (eg, via publication, reporting in results databases, or other data sharing arrangements), including any publication restrictions | 22              |
|                               | 31b | Authorship eligibility guidelines and any intended use of professional writers                                                                                                                                                                                                      | NA              |
|                               | 31c | Plans, if any, for granting public access to the full protocol, participant-level dataset, and statistical code                                                                                                                                                                     | NA              |
| <b>Appendices</b>             |     |                                                                                                                                                                                                                                                                                     |                 |
| Informed consent materials    | 32  | Model consent form and other related documentation given to participants and authorised surrogates                                                                                                                                                                                  | Supplementary 6 |
| Biological specimens          | 33  | Plans for collection, laboratory evaluation, and storage of biological specimens for genetic or molecular analysis in the current trial and for future use in ancillary studies, if applicable                                                                                      | NA              |

\*It is strongly recommended that this checklist be read in conjunction with the SPIRIT 2013 Explanation & Elaboration for important clarification on the items. Amendments to the protocol should be tracked and dated. The SPIRIT checklist is copyrighted by the SPIRIT Group under the Creative Commons "[Attribution-Non Commercial-No Derivs 3.0 Unported](https://creativecommons.org/licenses/by-nc-nd/3.0/)" license.

# BMJ Open

## Supervised exercise-therapy and Patient Education Rehabilitation (SUPER) versus minimal intervention for young adults at risk of knee osteoarthritis after ACL reconstruction: SUPER-Knee randomised controlled trial protocol

|                                 |                                                                                                                                                                                                                                                                                                                                                                                                                                                                                                                                                                                                                                                                                                                                                                                                                                                                                                                                                                                                                                                                                                                                               |
|---------------------------------|-----------------------------------------------------------------------------------------------------------------------------------------------------------------------------------------------------------------------------------------------------------------------------------------------------------------------------------------------------------------------------------------------------------------------------------------------------------------------------------------------------------------------------------------------------------------------------------------------------------------------------------------------------------------------------------------------------------------------------------------------------------------------------------------------------------------------------------------------------------------------------------------------------------------------------------------------------------------------------------------------------------------------------------------------------------------------------------------------------------------------------------------------|
| Journal:                        | <i>BMJ Open</i>                                                                                                                                                                                                                                                                                                                                                                                                                                                                                                                                                                                                                                                                                                                                                                                                                                                                                                                                                                                                                                                                                                                               |
| Manuscript ID                   | bmjopen-2022-068279.R1                                                                                                                                                                                                                                                                                                                                                                                                                                                                                                                                                                                                                                                                                                                                                                                                                                                                                                                                                                                                                                                                                                                        |
| Article Type:                   | Protocol                                                                                                                                                                                                                                                                                                                                                                                                                                                                                                                                                                                                                                                                                                                                                                                                                                                                                                                                                                                                                                                                                                                                      |
| Date Submitted by the Author:   | 12-Dec-2022                                                                                                                                                                                                                                                                                                                                                                                                                                                                                                                                                                                                                                                                                                                                                                                                                                                                                                                                                                                                                                                                                                                                   |
| Complete List of Authors:       | Culvenor, Adam; La Trobe University<br>West, Tom; La Trobe University<br>Bruder, AM; La Trobe University, Physiotherapy<br>Scholes, Mark; La Trobe University<br>Barton, Christian; La Trobe University College of Science Health and Engineering, Sport and Exercise Medicine Research Centre<br>Roos, Ewa; Syddansk Universitet Det Sundhedsvidenskabelige Fakultet, Sports Science and Clinical Biomechanics<br>Oei, Edwin; Erasmus Universiteit Rotterdam<br>McPhail, Steven; Queensland University of Technology, Australian Centre for Health Service Innovation and School of Public Health & Social Work<br>Souza, Richard; University of California San Francisco, Department of Radiology and Biomedical Imaging<br>Lee, Jusuk; University of California San Francisco, Department of Radiology and Biomedical Imaging<br>Patterson, Brooke; La Trobe University, La Trobe Sport and Exercise Medicine Research Centre, College of Science, Health and Engineering<br>Girdwood, Michael; La Trobe University<br>Couch, Jamon L; La Trobe University<br>Crossley, Kay; La Trobe University College of Science Health and Engineering |
| <b>Primary Subject Heading</b>: | Sports and exercise medicine                                                                                                                                                                                                                                                                                                                                                                                                                                                                                                                                                                                                                                                                                                                                                                                                                                                                                                                                                                                                                                                                                                                  |
| Secondary Subject Heading:      | Rehabilitation medicine, Sports and exercise medicine                                                                                                                                                                                                                                                                                                                                                                                                                                                                                                                                                                                                                                                                                                                                                                                                                                                                                                                                                                                                                                                                                         |
| Keywords:                       | Knee < ORTHOPAEDIC & TRAUMA SURGERY, REHABILITATION MEDICINE, SPORTS MEDICINE                                                                                                                                                                                                                                                                                                                                                                                                                                                                                                                                                                                                                                                                                                                                                                                                                                                                                                                                                                                                                                                                 |
|                                 |                                                                                                                                                                                                                                                                                                                                                                                                                                                                                                                                                                                                                                                                                                                                                                                                                                                                                                                                                                                                                                                                                                                                               |

SCHOLARONE™  
Manuscripts

1  
2  
3  
4  
5  
6  
7  
8  
9  
10  
11  
12  
13  
14  
15  
16  
17  
18  
19  
20  
21  
22  
23  
24  
25  
26  
27  
28  
29  
30  
31  
32  
33  
34  
35  
36  
37  
38  
39  
40  
41  
42  
43  
44  
45  
46  
47  
48  
49  
50  
51  
52  
53  
54  
55  
56  
57  
58  
59  
60

1  
2  
3  
4  
5  
6  
7  
8  
9  
10  
11  
12  
13  
14  
15  
16  
17  
18  
19  
20  
21  
22  
23  
24  
25  
26  
27  
28  
29  
30  
31  
32  
33  
34  
35  
36  
37  
38  
39  
40  
41  
42  
43  
44  
45  
46  
47  
48  
49  
50  
51  
52  
53  
54  
55  
56  
57  
58  
59  
60

# 1 **SUpervised exercise-therapy and Patient Education Rehabilitation (SUPER)** 2 **versus minimal intervention for young adults at risk of knee osteoarthritis** 3 **after ACL reconstruction: SUPER-Knee randomised controlled trial protocol**

4  
5  
6 Adam G Culvenor\*<sup>1,2</sup>, Thomas J West\*<sup>1,2</sup>, Andrea M Bruder<sup>1,2</sup>, Mark J Scholes<sup>1,2</sup>, Christian J Barton<sup>1,2</sup>,  
7 Ewa M Roos<sup>3</sup>, Edwin Oei<sup>4</sup>, Steven M McPhail<sup>5, 6</sup>, Richard B Souza<sup>7</sup>, Jusuk Lee<sup>8</sup>, Brooke E Patterson<sup>1, 2</sup>,  
8 Michael A Girdwood<sup>1,2</sup>, Jamon L Couch<sup>1,2</sup>, Kay M Crossley<sup>1,2</sup>

- 9  
10  
11  
12  
13  
14  
15  
16  
17  
18  
19  
20  
21  
22  
23  
24  
25  
26  
27  
28  
29  
30  
31  
32  
33  
34  
35  
36  
37  
38  
39  
40  
41  
42  
43  
44  
45  
46  
47  
48  
49  
50  
51  
52  
53  
54  
55  
56  
57  
58  
59  
60
1. La Trobe Sport and Exercise Medicine Research Centre, School of Allied Health, La Trobe University, Bundoora, Victoria, Australia
  2. Australian IOC Research Centre, La Trobe University, Bundoora, Victoria, Australia
  3. Department of Sports Science and Clinical Biomechanics, University of Southern Denmark, Odense, Denmark
  4. Department of Radiology & Nuclear Medicine, Erasmus MC Rotterdam, Rotterdam, The Netherlands
  5. Australian Centre for Health Services Innovation & Centre for Healthcare Transformation, School of Public Health & Social Work, Queensland University of Technology, Kelvin Grove, Queensland, Australia
  6. Clinical Informatics Directorate, Metro South Health, Woolloongabba, Queensland, Australia
  7. Department of Physical Therapy and Rehabilitation Science, University of California, San Francisco, California, USA
  8. Department of Radiology and Biomedical Imaging, University of California, San Francisco, California, USA

\* Co-first authors

### **Corresponding Author:**

Dr Adam Culvenor  
La Trobe Sport and Exercise Medicine Research Centre,  
La Trobe University,  
Kingsbury Drive, Bundoora, 3086  
Victoria, Australia  
Phone: +61 9479 5116  
Email: [a.culvenor@latrobe.edu.au](mailto:a.culvenor@latrobe.edu.au)

**Word count:** 4,580

1  
2  
3 39 **ABSTRACT**  
4

5 40 **Introduction:** Anterior cruciate ligament injury and reconstruction (ACLR) is often associated with pain,  
6  
7 41 functional loss, poor quality of life and accelerated knee osteoarthritis development. The effectiveness  
8  
9 42 of interventions to enhance outcomes for those at high risk of early-onset osteoarthritis is unknown.  
10  
11 43 This study will investigate if SUPERvised exercise-therapy and Patient Education Rehabilitation (SUPER)  
12  
13 44 is superior to a minimal intervention control for improving pain, function and quality of life in young  
14  
15 45 adults with ongoing symptoms following ACLR.  
16  
17  
18  
19  
20

21 47 **Methods and analysis:** The SUPER-Knee study is a parallel-group, assessor-blinded, randomised  
22  
23 48 controlled trial. Following baseline assessment, 184 participants aged 18-40 years and 9-36 months  
24  
25 49 post-ACLR with ongoing symptoms will be randomly allocated to one of two treatment groups (1:1  
26  
27 50 ratio). Ongoing symptoms will be defined as a mean score of <80/100 from four Knee injury and  
28  
29 51 Osteoarthritis Outcome Score (KOOS<sub>4</sub>) subscales covering pain, symptoms, function in sports and  
30  
31 52 recreational activities and knee-related quality of life. Participants randomised to SUPER will receive a  
32  
33 53 4-month individualised, physiotherapist-supervised strengthening and neuromuscular programme  
34  
35 54 with education. Participants randomised to minimal intervention (i.e., control group) will receive a  
36  
37 55 printed best-practice guide for completing neuromuscular and strengthening exercises following ACLR.  
38  
39 56 The primary outcome will be change in the KOOS<sub>4</sub> from baseline to 4 months with a secondary  
40  
41 57 endpoint at 12 months. Secondary outcomes include change in individual KOOS subscale scores,  
42  
43 58 patient-perceived improvement, health-related quality of life, kinesiophobia, physical activity, thigh  
44  
45 59 muscle strength, knee function and knee cartilage morphology (i.e., lesions, thickness) and  
46  
47 60 composition (T2 mapping) on magnetic resonance imaging. Blinded intention-to-treat analyses will be  
48  
49 61 performed. Findings will also inform cost-effectiveness analyses.  
50  
51  
52  
53  
54  
55

56 62  
57 63 **Ethics and dissemination:** This study is approved by the La Trobe University and Alfred Hospital  
58  
59  
60

1  
2  
3 64 Ethics Committees. Results will be presented in peer-reviewed journals and at international  
4  
5 65 conferences.  
6  
7  
8 66

9  
10 67 **Trial registration:** ACTRN12620001164987  
11  
12 68

13  
14 69 **Keywords:**

15  
16 70 anterior cruciate ligament, rehabilitation, osteoarthritis, knee, physiotherapy, exercise.  
17  
18  
19 71  
20  
21 72  
22

23 73 **Strengths and limitations of this study**

- 24  
25 74
- 26 • The exercise-therapy programme was developed and piloted with patients and clinicians,  
27 aligns with American College of Sports Medicine (ACSM) recommendations, and is described  
28 based on the Consensus on Exercise Reporting Template (CERT).  
29  
30 76
  - 31 • Sufficiently powered trial evaluating change from baseline to 4 months (primary endpoint)  
32 and 12 months facilitating longer-term effectiveness evaluation of exercise-therapy and  
33 education.  
34  
35 78
  - 36 • This trial will evaluate both the illness (i.e., symptoms) and disease (i.e., structure) of  
37 osteoarthritis and include cost-effectiveness analysis.  
38  
39 80
  - 40 • While outcome assessors are blinded to group allocation and physiotherapists delivering the  
41 intervention are blinded to the control intervention, participant blinding was not possible  
42 due to the type of interventions.  
43  
44 82
  - 45 • While outcome assessors are blinded to group allocation and physiotherapists delivering the  
46 intervention are blinded to the control intervention, participant blinding was not possible  
47 due to the type of interventions.  
48  
49 84
- 50 85  
51  
52  
53  
54  
55  
56  
57  
58  
59  
60

## 86 INTRODUCTION

87 Anterior cruciate ligament (ACL) rupture is one of the most common serious knee injuries in young,  
88 healthy people participating in sports involving jumping, pivoting and cutting activities [1]. Treatment  
89 success is often judged on a timely return to sport [2]. Yet, 55% do not return to competitive sport [3],  
90 and half will develop post-traumatic knee osteoarthritis (OA), unacceptable persistent pain, functional  
91 loss and poor quality of life before the age of 40 years [4-7]. Occupational and carer responsibilities in  
92 many of these young adults also creates formidable societal and economic burden.

93  
94 Osteoarthritis can be characterised by symptoms such as pain and functional limitations and/or  
95 structural joint changes seen on imaging. Both symptoms and structural changes are common within  
96 the first decade after ACL reconstruction (ACLR), yet they are often discordant [5, 8]. International  
97 government-endorsed OA initiatives recommend evaluating symptoms and structure in OA clinical  
98 trials to address the heterogeneity of the disease [9].

99  
100 Identifying interventions that can improve knee-related symptoms and prevent or slow structural  
101 changes in young adults following ACLR is an international priority [10, 11]. Exercise-therapy improves  
102 pain and function in older populations with primary (non-traumatic) knee OA [12], but effective  
103 treatments to improve structure (i.e., disease-modifying interventions) have thus far proved elusive  
104 [13]. Secondary prevention strategies for those with early manifestations (or at high risk) of OA, such  
105 as following ACLR, offer potential to alter the OA trajectory [14, 15]. Targeted exercise-therapy might  
106 slow structural worsening [16], with preliminary studies reporting improved knee cartilage  
107 composition in people at risk of OA (post-meniscectomy) [17] and with non-traumatic early OA over 4  
108 and 12 months, respectively [18, 19].

109  
110 People who report inadequate recovery (ongoing symptoms and impaired function) one year after  
111 ACLR are likely to have worsening symptoms and rapidly deteriorating joint structure in the future [20-



1  
2  
3 112 22]. These young adults with inadequate recovery urgently need treatment options to alter their OA  
4  
5 113 trajectory. Our feasibility study indicated that a full-scale randomised controlled trial (RCT) evaluating  
6  
7 114 a physiotherapist-led, exercise-therapy and education programme for young adults with ongoing  
8  
9 115 symptoms approximately one year after ACLR (i.e., when no further improvement is likely without  
10  
11 116 treatment) is feasible and likely associated with a clinically worthwhile effect for pain, function and  
12  
13  
14 117 quality of life [23].  
15  
16  
17 118

18  
19 119 The primary aim of this RCT is to estimate the average effect of SUPervised exercise-therapy and  
20  
21 120 Patient Education Rehabilitation (SUPER) compared to a minimal intervention control on knee-related  
22  
23 121 pain, function and quality of life in young adults with ongoing symptoms at high risk of early-onset  
24  
25 122 knee OA 9-36 months after ACLR. We hypothesise that the SUPER intervention will result in greater  
26  
27 123 improvements in knee-related pain, symptoms, function and quality of life after 4 months (primary  
28  
29 124 endpoint) and 12 months (secondary endpoint) compared to a minimal intervention control.  
30  
31 125 Secondary aims are to assess 4- and 12-month effectiveness of SUPER on: i) self-reported global rating  
32  
33 126 of change (GROC) and achievement of acceptable symptoms; ii) health-related quality of life; iii)  
34  
35 127 physical activity; iv) kinesiophobia; v) thigh muscle strength and function; and vi) change in knee  
36  
37 128 cartilage health. Intervention and healthcare resource use will also be recorded to inform economic  
38  
39 129 evaluation.  
40  
41  
42  
43 130  
44  
45 131

## 47 132 **METHODS AND ANALYSIS**

### 49 133 **Study design**

50  
51  
52 134 This study protocol describes a pragmatic, parallel-group assessor-blinded RCT conforming to the  
53  
54 135 Standard Protocol Items: Recommendations for Interventional Trials (SPIRIT) statement [24].  
55  
56 136 Reporting of the completed RCT will conform to the Consolidated Standards of Reporting Trials  
57  
58 137 (CONSORT) statement for reporting RCTs [25] in conjunction with the Template for Intervention  
59  
60

138 Description and Replication (TiDieR) [26], and the Consensus on Exercise Reporting Template (CERT)  
 139 guidelines [27]. The trial will be conducted at a single university site (La Trobe University) in Melbourne,  
 140 Australia with enrolment planned to occur over three years (2021-2023) and 12-month follow-up  
 141 completed in 2024. The primary endpoint will be at 4 months (immediately following the intensive  
 142 supervised exercise-therapy phase), with additional follow-up at a minimum of 12 months (further  
 143 longer-term follow-up dependent on funding). The study was prospectively registered on the  
 144 Australian & New Zealand Clinical Trial Registry (ACTRN12620001164987).

145

## 146 **Participants**

147 One hundred and eighty-four young adults fulfilling the eligibility criteria (table 1) will be included.

148

### 149 **Table 1.** Eligibility criteria

| <b>Inclusion criteria</b>                                                                                                                                                                         | <b>Exclusion criteria</b>                                                                                                                                |
|---------------------------------------------------------------------------------------------------------------------------------------------------------------------------------------------------|----------------------------------------------------------------------------------------------------------------------------------------------------------|
| Aged 18-40 years at the time of ACLR                                                                                                                                                              | Synthetic ACLR graft                                                                                                                                     |
| 9-36 months following ACLR                                                                                                                                                                        | Concomitant intra-articular knee fracture                                                                                                                |
| Symptomatic ACLR knee: mean score of <80/100 from four Knee injury and OA Outcome Score (KOOS <sub>4</sub> ) subscales covering pain, symptoms, function in sports/recreation and quality of life | Planning to relocate interstate/internationally in following 12 months or unable to commit to study assessments                                          |
| Willing and able to participate in exercise-therapy 2-3 times per week for at least 4 months                                                                                                      | Any of the following in the past 3 months: knee re-injury, surgery or injection (either knee)                                                            |
|                                                                                                                                                                                                   | Undertaken rehabilitation in past 6 weeks (for conditions affecting either knee)                                                                         |
|                                                                                                                                                                                                   | Contraindications to MRI                                                                                                                                 |
|                                                                                                                                                                                                   | Planning knee surgery in following 12 months (e.g., graft rupture, cyclops lesion (localised anterior arthrofibrosis) on MRI)                            |
|                                                                                                                                                                                                   | Other reasons for exclusion (health condition affecting physical function, mentally unable to participate, pregnancy, unable to understand English, etc) |

150 ACLR, anterior cruciate ligament reconstruction; MRI, magnetic resonance imaging

151

## 152 **Recruitment procedure**

1  
2  
3 153 Trial flow is outlined in figure 1. Participants will be recruited from approximately 15 collaborating  
4  
5 154 private orthopaedic surgeons and eight public hospital sites in Victoria, Australia. Consistent with our  
6  
7 155 pilot work [28, 29], potentially eligible participants (i.e., individuals with an ACLR from our network of  
8  
9 156 collaborating private orthopaedic surgeons or public hospitals) will be mailed study information  
10  
11 157 inviting them to contact a member of the research team. Additional participants will be recruited from  
12  
13 158 the general community via advertisements in local newspapers, community magazines and  
14  
15 159 newsletters (e.g., university staff bulletins, sports club newsletters), posters in the community and  
16  
17 160 social media.  
18  
19  
20

21 161  
22  
23 162 Volunteers responding to the invitation letter or advertisements will be screened for eligibility using a  
24  
25 163 three-stage process. Firstly, screening questions will be asked via telephone or e-mail. Secondly,  
26  
27 164 potentially suitable volunteers will be sent the Knee injury and OA Outcome Score (KOOS)  
28  
29 165 questionnaire electronically (or hard copy if preferred) to confirm symptomatic eligibility. Thirdly,  
30  
31 166 baseline magnetic resonance imaging (MRI) scans will be assessed to confirm the absence of any  
32  
33 167 pathology potentially necessitating surgery (e.g., graft rupture, symptomatic cyclops lesion). If both  
34  
35 168 knees are eligible, the most symptomatic knee will be considered as the index knee for the trial.  
36  
37  
38

39 169

40  
41 170 ---FIGURE 1 HERE---

42  
43 171

#### 44 45 172 **Randomisation procedure, concealment of allocation and blinding**

46  
47 173 Eligible, willing and consenting volunteers will be randomised to the SUPER or control group after  
48  
49 174 baseline assessment, commencing as soon as possible. A computer-generated randomisation schedule  
50  
51 175 has been developed *a priori* by an independent statistician in random permuted blocks of 4-8 to  
52  
53 176 maintain a periodic allocation ratio of 1:1. To ensure concealed allocation, the randomisation schedule  
54  
55 177 will be stored electronically in the secure Research Electronic Data Capture (REDCap) system and only  
56  
57 178 accessible to an unblinded researcher once baseline measures have been obtained. Investigators  
58  
59  
60

1  
2  
3 179 conducting study assessments will be blind to group allocation. As the primary outcome is self-  
4  
5 180 reported, participants are considered assessors; therefore, participants (and thus assessors) will be  
6  
7 181 blinded to previous scores. Physiotherapists and participants cannot be blinded to group allocation  
8  
9  
10 182 owing to the type of interventions. An independent statistician, blinded to group allocation, will  
11  
12 183 perform the primary RCT analysis. To reduce risk of interpretation bias, blinded results from the  
13  
14 184 analyses (Group A compared with Group B) will be presented to all authors, who will agree on two  
15  
16 185 alternative written interpretations before the data manager unblinds the randomisation code [30].  
17  
18  
19 186

## 20 21 187 **Interventions**

### 22 23 188 ***Supervised exercise-therapy and Patient Education Rehabilitation (SUPER)***

24  
25 189 Participants allocated to SUPER will participate in a supervised exercise programme, developed based  
26  
27 190 on best available evidence for patients with ACLR and other knee injuries including OA [31-33], and  
28  
29 191 with input from patients and experienced physiotherapists. An overview of the SUPER programme  
30  
31 192 aligning to the CERT guidelines is contained in Supplementary File 1 and summarised as per TIDieR  
32  
33 193 guidelines in table 2. The SUPER intervention aims to increase lower-limb muscle strength, endurance  
34  
35 194 and power, functional performance and neuromuscular control, increase understanding of knee  
36  
37 195 health, facilitate return to desired sports activity and enhance physical activity. Registered  
38  
39 196 physiotherapists with  $\geq 3$  years of experience treating patients following ACLR will deliver SUPER in  
40  
41 197 community settings following a 4-hour training workshop supplemented with three hours of online  
42  
43 198 webinars. To minimise participant travel burden, study physiotherapists will be located at 12-14  
44  
45 199 private physiotherapy clinics across greater Melbourne and regional Victoria.  
46  
47  
48  
49

50 200

51  
52 201 SUPER is divided into two phases.

53  
54 202 Phase 1: 0-4 months. Participants will be provided with details of the SUPER intervention verbally and  
55  
56 203 via an intervention handbook detailing all exercises and an exercise logbook, and provided access to  
57  
58 204 videos of all exercises. Participants will complete their exercise programme supervised by a  
59  
60

1  
2  
3 205 physiotherapist twice per week in Phase 1, with at least one additional unsupervised session at a gym  
4  
5 206 or home encouraged (table 2). Participants/physiotherapists will also have the option of a second  
6  
7 207 opinion by a member of our clinical expert physiotherapy team if SUPER is failing to facilitate  
8  
9 208 improvement (either at 2- or 4-months post-baseline). Second opinion will provide assessment and  
10  
11  
12 209 guidance on exercise-therapy and patient education needs.  
13

14 210

15  
16 211 Phase 2: (5-12 months). The intervention provided in Phase 2 will depend on whether the following  
17  
18 212 predefined criteria are met at the 4-month follow-up assessment: participant's goals are met (i.e., goals  
19  
20 213 set with treating physiotherapist at start of Phase 1), participant satisfied with current  
21  
22 214 symptoms/function (i.e., responded 'yes' to patient acceptable symptom state question (see  
23  
24 215 Outcomes for details)) and GROC reported as at least 'better'.  
25  
26  
27

28 216

29  
30 217 For participants meeting all criteria, Phase 2 will involve ongoing independent exercise-therapy  
31  
32 218 sessions (approximately 30-60 minutes duration, 2-3 x per week at a gym or home). Participants may  
33  
34 219 request a physiotherapy booster session if they become unsure about continuing self-management or  
35  
36 220 exercise-therapy or pre-defined criteria are no longer met. Booster sessions can continue once per  
37  
38 221 week and will focus on the priority exercises and discussion of self-management strategies.  
39  
40

41 222

42  
43 223 Participants not meeting all criteria at the end of Phase 1 will be offered ongoing once per week  
44  
45 224 supervised exercise-therapy in Phase 2. Once all criteria are met, participants will continue  
46  
47 225 unsupervised exercise-therapy sessions at a gym or home with physiotherapy booster sessions as  
48  
49 226 required (as per above criteria). All participants will be offered a membership to a local gym to  
50  
51 227 encourage unsupervised exercise-therapy during Phase 2. An additional booster session with the  
52  
53 228 treating physios will occur at 8- and 11-months post-baseline.  
54  
55

56 229  
57  
58  
59  
60

1  
2  
3 230 Exercise-therapy will be tailored to each participant to match their individual preferences, goals and  
4  
5 231 clinical presentation (e.g., muscle strength, pain severity, and personal, sporting, work and functional  
6  
7 232 needs). The exercise-therapy programme consists of five “priority” exercises and four optional  
8  
9  
10 233 exercises (table 2, Supplementary File 2). The total number of exercises prescribed (maximum number  
11  
12 234 of nine) will depend on the participant’s available time and willingness, and physiotherapist clinical  
13  
14 235 reasoning – but will always include the five “priority” exercises.  
15

16 236  
17  
18 237 Each exercise has 3-6 levels of difficulty. Physiotherapists will supervise and progress exercises based  
19  
20 238 on defined criteria guided by American College of Sports Medicine strength training principles [34] and  
21  
22 239 perceived difficulty using rating of perceived exertion and minimal pain (e.g., <3/10 on numerical pain  
23  
24 240 scale) (details in Supplementary File 1).  
25

26 241  
27  
28 242 Patient education was co-designed with experienced physiotherapists and pilot study participants[23]  
29  
30 243 and aims to support the exercise-therapy programme and build motivation and capability to sustain  
31  
32 244 the exercises during and after the initial 4-month supervised phase (table 2). Individualised health  
33  
34 245 education regarding expectations and goals, exercise principles, improving adherence, pain/fear  
35  
36 246 management, long-term outcomes, weight control, and appropriate physical, occupational and  
37  
38 247 sporting activity promotion, will be delivered during the physiotherapy treatment sessions. Two  
39  
40 248 dedicated education sessions of 45-60 minutes duration will be delivered during Phase 1 (week 1 and  
41  
42 249 week 4). Participants will be counselled regarding physical activity levels with a targeted training  
43  
44 250 program adhering to Australian Physical Activity Guidelines and given an activity monitor (Garmin  
45  
46 251 vívofit® 4 activity tracker) if they do not have access to one to support measurement and attainment  
47  
48 252 of physical activity goals.  
49  
50  
51  
52  
53  
54  
55  
56  
57  
58  
59  
60

253 Table 2: Overview of intervention delivery described according to the TIDieR guidelines

| 1. Brief name        | SUPER intervention                                                                                                                                                                                                                                                                                                                                                                                                                                                                                                                                                                                              | Minimal intervention control                                                                                                                                                                                                                                           |
|----------------------|-----------------------------------------------------------------------------------------------------------------------------------------------------------------------------------------------------------------------------------------------------------------------------------------------------------------------------------------------------------------------------------------------------------------------------------------------------------------------------------------------------------------------------------------------------------------------------------------------------------------|------------------------------------------------------------------------------------------------------------------------------------------------------------------------------------------------------------------------------------------------------------------------|
| 2. Why               | Exercise-therapy to enhance muscle strength, function and physical activity can improve pain and quality of life in older adults with OA[12] and address risk factors for post-traumatic OA [35].                                                                                                                                                                                                                                                                                                                                                                                                               | The booklet was produced based on information provided to patients and thus, accurately reflects usual care.                                                                                                                                                           |
| 3. What materials    | Participants receive an intervention handbook detailing all study details, exercises and logbook, and access to videos of all exercises.                                                                                                                                                                                                                                                                                                                                                                                                                                                                        | Participants receive a “best-practice guide” booklet of possible exercises with no specific exercise prescription frequency.                                                                                                                                           |
| 4. What procedures   | Five priority exercises targeting: i) weight-bearing knee extension; ii) open-chain knee extension; iii) plyometrics; iv) balance/agility; v) knee flexion <b>and</b> four optional exercises targeting: a) trunk; b) hip abductors; c) hip adductors; d) calf – each with 3-6 levels of difficulty. Physiotherapists prescribe strength exercises (3 x 8-12 reps) with perceived exertion criteria (aim $\geq 7/10$ ) and progressed as per ACSM and periodisation guidelines (1 week/month easier $\sim 5/10$ exertion). Dedicated education sessions at week 1 and week 4, supported by slides and booklets. | Booklet explained at randomisation. Exercise options provided (similar to SUPER intervention), but not prescribed. Participants expected to exercise unsupervised. Participants may contact the physiotherapist by phone once only to ask questions/get clarification. |
| 5. Who provided      | Registered physiotherapists with $\geq 3$ years of relevant experience, trained to deliver all components (exercise and education).                                                                                                                                                                                                                                                                                                                                                                                                                                                                             | One appointment with a registered physiotherapist with $\geq 3$ years clinical experience, not involved in delivering SUPER intervention, to explain booklet elements.                                                                                                 |
| 6. How               | Delivered supervised in groups and individually (supported by unsupervised sessions) in Phase 1, progressing to completely unsupervised in Phase 2.                                                                                                                                                                                                                                                                                                                                                                                                                                                             | Delivered unsupervised.                                                                                                                                                                                                                                                |
| 7. Where             | Supervised sessions at private physiotherapy clinics and unsupervised sessions at gym/home.                                                                                                                                                                                                                                                                                                                                                                                                                                                                                                                     | Booklet explained at La Trobe University, Melbourne. Gym and home exercise options provided.                                                                                                                                                                           |
| 8. When and how much | <u>Phase 1 (0-4 months):</u><br><u>Frequency and Duration</u><br>Supervised sessions (30-60 mins) 2 times/week<br>Unsupervised sessions (30-60 mins) 1-2 times/week                                                                                                                                                                                                                                                                                                                                                                                                                                             | Unsupervised exercise-therapy (self-prescribed frequency) after one face-to-face appointment.                                                                                                                                                                          |

---

|                               |                                                                                                                                                                                                                                                                                                                                                                         |                                               |
|-------------------------------|-------------------------------------------------------------------------------------------------------------------------------------------------------------------------------------------------------------------------------------------------------------------------------------------------------------------------------------------------------------------------|-----------------------------------------------|
|                               | <i>Number of Sessions:</i>                                                                                                                                                                                                                                                                                                                                              |                                               |
|                               | 32 supervised + 16 unsupervised                                                                                                                                                                                                                                                                                                                                         |                                               |
|                               | <u>Phase 2 (5-12 months):</u>                                                                                                                                                                                                                                                                                                                                           |                                               |
|                               | <i>Frequency and Duration</i>                                                                                                                                                                                                                                                                                                                                           |                                               |
|                               | Progress to unsupervised sessions 2-3 times weekly<br>(dependent on meeting predefined criteria*).                                                                                                                                                                                                                                                                      |                                               |
|                               | Two supervised (booster) sessions at 8 and 11 months<br>post-baseline.                                                                                                                                                                                                                                                                                                  |                                               |
|                               | <i>Number of Sessions:</i>                                                                                                                                                                                                                                                                                                                                              |                                               |
|                               | 2 supervised + 108 unsupervised                                                                                                                                                                                                                                                                                                                                         |                                               |
| <b>9. Tailoring</b>           | Tailored selection and progression of lower-limb muscle strength, power and neuromuscular control exercises and education based on participant preferences, goals and clinical presentation.                                                                                                                                                                            | Standardised exercise examples and education. |
| <b>10. Modifications</b>      | Modifications will be reported. If state and/or institution COVID-19 pandemic restrictions prevent face-to-face follow-up assessments, participants will be encouraged to continue assigned treatment until face-to-face assessments can be conducted. If restrictions prevent supervised rehabilitation, telerehabilitation options will be offered wherever possible. |                                               |
| <b>11. How well (planned)</b> | Treating physiotherapists receive prior training in how to deliver and supervise the programme. Fidelity assessed by auditing. Participant adherence to supervised and unsupervised sessions assessed through logbooks, clinic attendance sheets and online (fortnightly/monthly) questionnaire.                                                                        |                                               |
| <b>12. How well (actual)</b>  | This will be reported in the primary paper.                                                                                                                                                                                                                                                                                                                             |                                               |

---

254 SUPER, SUPervised exercise-therapy and Patient Education Rehabilitation; OA, osteoarthritis; ACSM, American College of Sports Medicine

255 \* predefined criteria for ceasing supervised sessions in Phase 2 = participant's goals are met, participant satisfied with current symptoms/function, and global  
256 rating of change reported as at least 'better'.  
257

258



1  
2  
3 259 **Minimal intervention control**  
4

5 260 Reflecting current standard care, the minimal intervention control group will receive a “best-practice  
6  
7 261 guide” booklet and one face-to-face appointment with a registered physiotherapist with  $\geq 3$  years of  
8  
9 262 clinical experience (not involved in treating participants in the SUPER intervention) to explain booklet  
10  
11 263 elements and answer questions about its contents. The booklet outlines similar exercises and patient  
12  
13 264 education as in the SUPER intervention (Supplementary File 3). However, exercise is expected to be  
14  
15 265 performed unsupervised (table 2). Participants may also contact the treating physiotherapist by phone  
16  
17 266 on one occasion to ask questions or get further clarification but will not be provided with information  
18  
19 267 extending the scope of the booklet. The booklet was produced based on the information provided by  
20  
21 268 ten high volume orthopaedic surgeons in Melbourne to their patients post-ACLR. Participants will be  
22  
23 269 encouraged at the 4-month assessment to continue following the booklet up until the 12-month  
24  
25 270 assessment.  
26  
27  
28  
29

30 271  
31  
32 272 Irrespective of group allocation, participants will be asked to refrain from other musculoskeletal  
33  
34 273 therapies (e.g., chiropractic care, osteopathy, myotherapy, intra-articular injections) for their knee  
35  
36 274 pain during the trial. Participants will be allowed to continue care for other unrelated pre-existing  
37  
38 275 conditions.  
39  
40

41 276

42  
43 277 **Data collection procedure**  
44

45 278 Data will be collected at baseline and 2, 4 and 12 months after randomisation, with 4 months the *a*  
46  
47 279 *priori* primary endpoint as this coincides with the completion of the supervised exercise-therapy  
48  
49 280 intervention in Phase 1. Where possible, data will be collected and managed using a secure web-based  
50  
51 281 software platform (Research Electronic Data Capture; REDCap) hosted at La Trobe University [36],  
52  
53 282 which has equivalent measurement properties to paper-based completion [37]. This strategy was used  
54  
55 283 in our pilot study following ACLR, with demonstrated feasibility [23]. Paper versions will also be  
56  
57 284 available if preferred by participants.  
58  
59  
60

285

286 **Outcomes**287 ***Baseline characteristics***

288 Participant characteristics including height, body mass, waist girth, leg length, knee injury and  
 289 rehabilitation details, socioeconomic details (e.g., education level, employment status), family history  
 290 of OA, sporting history and health literacy (Rapid Estimate of Adult Literacy in Medicine: REALM [38])  
 291 will be collected. Surgical details will be recorded from surgical files including date, graft type, and  
 292 concomitant injuries/procedures. We will also record knee-related objective measures (table 3).

293

294 **Table 3.** Overview of data collection

|                                              | Baseline | 2 months | 4 months | 12 months |
|----------------------------------------------|----------|----------|----------|-----------|
| <b>Participant characteristics</b>           |          |          |          |           |
| Age                                          | X        |          |          |           |
| Sex                                          | X        |          |          |           |
| Height, body mass, waist girth               | X        |          | X        | X         |
| Country of birth                             | X        |          |          |           |
| Education level                              | X        |          |          |           |
| Living situation                             | X        |          |          |           |
| Smoking history                              | X        |          |          |           |
| Health literacy (REALM)                      | X        |          |          |           |
| Employment status                            | X        |          | X        | X         |
| Prior knee injury/treatment                  | X        |          |          |           |
| ACL injury, surgery & rehabilitation details | X        |          |          |           |
| Sport/Activity participation                 | X        |          | X        | X         |
| Family history of osteoarthritis             | X        |          |          |           |
| Medication use                               | X        |          |          |           |
| Comorbidities                                | X        |          |          |           |
| Flexion/extension range of motion            | X        |          | X        | X         |
| Joint line tenderness (medial and lateral)   | X        |          | X        | X         |
| Crepitus                                     | X        |          | X        | X         |
| Effusion (sweep test)                        | X        |          | X        | X         |
| Stability (Lachman's, Pivot shift)           | X        |          |          |           |
| <b>Patient-reported Outcomes</b>             |          |          |          |           |
| Knee injury Osteoarthritis Outcome Score     | X        | X        | X        | X         |
| EQ-5D-5L                                     | X        | X        | X        | X         |
| Tegner Activity Scale                        | X        | X        | X        | X         |
| Tampa Scale of Kinesiophobia                 | X        |          | X        | X         |
| Global rating of change                      |          | X        | X        | X         |
| Patient acceptable symptoms state            | X        | X        | X        | X         |
| Health and Labour Questionnaire              | X        |          | X        | X         |
| Work Limitations Questionnaire               | X        |          | X        | X         |
| ACL-Quality of Life Questionnaire            | X        |          | X        | X         |

|                                            |   |   |   |   |
|--------------------------------------------|---|---|---|---|
| Knee pain (current and worst in last week) | X | X | X | X |
| <b>Physical performance tests</b>          |   |   |   |   |
| Hop performance (four tests)               | X |   | X | X |
| One-leg rise                               | X |   | X | X |
| Isometric thigh muscle strength            | X |   | X | X |
| Lower-limb loading                         | X |   | X | X |
| <b>MRI outcomes</b>                        |   |   |   |   |
| Average daily steps                        | X |   | X | X |

295 ACL, anterior cruciate ligament; MRI, magnetic resonance imaging; REALM, Rapid Estimate of Adult Literacy in  
296 Medicine

297 All participants will receive either a fortnightly (during Phase 1) or monthly (during Phase 2) online  
298 questionnaire via the secure online platform (REDCap) (or hard copy mailed, or phone call depending on  
299 participant preference) to assess sports activity, adherence to exercise-therapy, and any adverse events/other  
300 treatment.

301

302

### 303 **Primary outcome**

304 The primary outcome is the change in KOOS<sub>4</sub> score from baseline to 4-month follow-up. KOOS<sub>4</sub> is the  
305 mean score for the self-reported KOOS subscales pain, symptoms, function in sports and recreational  
306 activities and quality of life, which has been used in RCTs following ACL injury [39]. The KOOS<sub>4</sub> and all  
307 KOOS subscale scores range from 0 (worst) to 100 (best). The KOOS is a valid and reliable knee-specific  
308 questionnaire for assessing patient-reported outcomes in various knee injury populations (e.g., from  
309 knee injury to OA) and is widely used globally [40, 41].

310

### 311 **Secondary outcomes**

#### 312 *KOOS subscales*

313 To allow for clinical in-depth interpretation, scores for the five KOOS subscales will be reported  
314 individually (i.e., pain, symptoms, function in sports and recreational activities, activities of daily living,  
315 and quality of life)[40].

316

#### 317 *Physical performance*

318 Peak isometric knee extensor and flexor muscle strength and rate of force development will be  
319 assessed in sitting using reliable and valid methods at 60° of knee flexion on isokinetic equipment  
320 (Biodex Medical Systems, NY, USA) [42]. A battery of lower-limb functional tasks commonly used

1  
2  
3 321 following ACLR will assess functional performance: i) single hop for distance; ii) triple cross-over hop  
4  
5 322 for distance; iii) side-hop; iv) vertical hop; and v) one-leg rise [5, 43, 44]. Such a battery produces high  
6  
7 323 reliability and sensitivity in populations following ACLR [45]. Details of physical performance tests are  
8  
9 324 contained in Supplementary File 4.  
10

11 325

### 12 326 *Perceived global change score and patient acceptable symptom state*

13  
14  
15  
16 327 Global rating of change (GROC) will be assessed for pain and function with the questions: 'Overall, how  
17  
18 328 has your knee pain changed since the start of the study?' and 'Overall, how has your knee function  
19  
20 329 changed since the start of the study?' Answered on a 7-point Likert scale ranging from 'much worse'  
21  
22 330 to 'much better' and dichotomised to 'improved' ('much better', 'better') versus 'not improved' ('a  
23  
24 331 little better' to 'much worse'). Satisfaction with current knee function (i.e., patient acceptable  
25  
26 332 symptom state (PASS)) will be assessed with the question: 'Considering your knee function, do you feel  
27  
28 333 that your current state is satisfactory? With knee function, you should take into account all activities  
29  
30 334 during your daily life, sport and recreational activities, your level of pain and other symptoms, and also  
31  
32 335 your knee-related quality of life.'" Answered by 'yes or 'no' [46]. Participants not satisfied with current  
33  
34 336 knee function at follow-up assessments (i.e., answering 'no' to the PASS question) will be asked a  
35  
36 337 second question relating to treatment failure: 'Would you consider your current state as being so  
37  
38 338 unsatisfactory that you think the treatment has failed?' Answered by 'yes' or 'no' [46].  
39  
40  
41  
42

43 339

### 44 340 *Knee joint structure*

45  
46  
47  
48 341 Unilateral knee MRIs will be obtained in supine with the lower-limb in neutral alignment using a 3T  
49  
50 342 scanner (Signa Pioneer, General Electric Healthcare, Milwaukee, USA) and 18-channel knee coil.  
51  
52 343 Sequences acquired will include proton density weighted fat suppressed fast spin-echo sequences in  
53  
54 344 the sagittal, coronal and axial planes, a T2 mapping multi-echo spin-echo sagittal sequence and a  
55  
56 345 sagittal fast spoiled gradient echo (FSPGR) sequence (Figure 2, Supplementary File 5). Changes in  
57  
58 346 cartilage collagen content and orientation in extracellular matrices reflecting degeneration will be  
59  
60

1  
2  
3 347 defined by quantitative changes in T2 relaxation times[47] from baseline to 4- and 12-month follow-  
4  
5 348 up assessments. Knee cartilage thickness changes over 4 and 12 months will also be assessed [48].  
6  
7 349 Post-processing software incorporating semi-automated registration and manual segmentation in 3D  
8  
9 350 will be used for both T2 relaxation time and cartilage thickness. Knee OA features (e.g., cartilage  
10  
11 351 defects, meniscal tears, bone marrow lesions, osteophytes) will be scored with established scoring  
12  
13 352 systems [49, 50] at baseline and 12-month follow-up by a trained reader blinded to clinical outcomes.  
14  
15 353 Individual OA feature worsening will be defined as increase in the size or depth of lesions as previously  
16  
17 354 established [51]. Bone shape at the knee will also be assessed using edge-detection semi-automated  
18  
19 355 segmentation with 3D triangulated meshes of bone rigidly registered on a reference template to  
20  
21 356 extract the most important modes of variation of bone shape [52].  
22  
23  
24  
25  
26  
27

28 358 ---FIGURE 2 HERE---

29  
30 359

31  
32 360 ***Other outcomes***

33  
34 361 *Fear of movement*

35  
36 362 Knee-related fear of movement will be assessed with the Tampa Scale for Kinesiophobia [53]. This scale  
37  
38 363 has established reliability and validity in musculoskeletal pain populations [54, 55].  
39  
40

41 364

42  
43 365 *Physical activity*

44  
45 366 The Tegner Activity Scale will assess self-reported activity level. It is a valid and reliable numerical scale  
46  
47 367 from 0 (sick leave because of knee problems) to 10 (competitive knee-demanding sports at an elite  
48  
49 368 level), with each value indicating the ability to perform certain activities [56]. Objective physical activity  
50  
51 369 will be captured using a Garmin vívoFit® 4 activity tracker (Garmin® International Inc., KS, USA) or  
52  
53 370 participant's own device, if appropriate.  
54  
55

56  
57 371

58  
59 372 *Quality of life*  
60

1  
2  
3 373 We will assess knee-related quality of life, with the ACL-Quality of life questionnaire [57], and health-  
4  
5 374 related quality of life with the EQ-5D-5L [58]. These measures are reliable and valid for knee pain  
6  
7 375 populations [59, 60].  
8  
9

10 376

### 11 377 *Lower-limb loading*

12  
13  
14 378 Lower-limb loading will be assessed using ground reaction force data during unilateral and bilateral  
15  
16 379 weight-bearing tasks (squat, hop and drop-jump) using force plates and ForceDecks software (Vald  
17  
18 380 Performance Pty. Ltd., UK).  
19

20 381

### 21 382 *Knee pain*

22  
23  
24 383 Current and worst knee pain (and how much participants are bothered by pain) in the previous week  
25  
26 384 will be assessed on a 100mm visual analogue scale (0=no pain/bother, 100=worst pain/bother  
27  
28 385 imaginable).  
29

30 386

### 31 387 *Treatment-related outcomes*

#### 32 388 *Adherence, exercise level/intensity and other treatments received during the trial*

33  
34  
35  
36  
37 389 Adherence with the supervised exercise-therapy sessions (i.e., number of sessions attended out of 32  
38  
39 390 possible) Phase 1 sessions) and intensity/progression of the exercises will be recorded by treating  
40  
41 391 physiotherapists and participants. Inadequate adherence is defined as participating in <22 (70%)  
42  
43 392 supervised sessions. Participants in both groups will record adherence to home exercises and any co-  
44  
45 393 interventions received in a logbook and via fortnightly (Phase 1) and monthly (Phase 2) online  
46  
47 394 questionnaires.  
48  
49

50 395

#### 51 396 *Adverse events*

52  
53  
54 397 Any adverse events will be recorded fortnightly during Phase 1 and monthly during Phase 2 via  
55  
56 398 questionnaires. Furthermore, open probe questioning will enquire about possible adverse events at  
57  
58  
59  
60

1  
2  
3 399 each of the follow-ups. Healthcare use data obtained as part of cost-effectiveness analysis at final  
4  
5 400 follow-up will also be checked for potential adverse events. An adverse event is defined as any  
6  
7 401 undesirable experience causing participants to seek medical treatment. A serious adverse event is  
8  
9 402 defined as any undesirable event/illness/injury classified as having the potential to significantly  
10  
11 403 compromise clinical outcome or result in significant disability or incapacity, and those requiring  
12  
13 404 inpatient hospital care. Adverse events will be categorised into index knee or other sites and will be  
14  
15 405 assessed for severity by the trial management committee.  
16  
17  
18  
19  
20

#### 21 407 **Data management**

22  
23 408 Most outcome data will be collected and managed via REDCap web-based software (hosted at La Trobe  
24  
25 409 University), facilitating simultaneous data entry. For paper-based data collection, data will be entered  
26  
27 410 by a single investigator with a second investigator conducting random checks of a subset of manually  
28  
29 411 entered documents to ensure accuracy. For data analysis, personal data, including participant names,  
30  
31 412 contact details, date of birth and MRI scans will be stored on the La Trobe University server Research  
32  
33 413 Drive Storage, separately from deidentified (numbered) data. All subsequent study data will be  
34  
35 414 identified by participant number only.  
36  
37  
38  
39  
40

41 416 Due to the minimal known risks associated with the interventions being evaluated, this study will not  
42  
43 417 have a formal data monitoring committee and does not require an interim analysis. Any unexpected  
44  
45 418 serious adverse events or outcomes will be discussed by the trial management committee (identical  
46  
47 419 to the authors of this protocol).  
48  
49  
50

#### 51 420 52 421 **Sample size calculation**

53  
54 422 This trial has been powered to detect a clinically significant between-group difference for the primary  
55  
56 423 outcome of KOOS<sub>4</sub>. The overall effect size for exercise-therapy on self-reported pain and disability is  
57  
58 424 moderate (0.50) [12]. With this effect size, to achieve 85% power at a two-sided 0.05 significance level  
59  
60

1  
2  
3 425 on the KOOS<sub>4</sub>, 146 participants are required. To account for a 20% drop-out, we will recruit 184  
4  
5 426 participants. This sample size will be sufficient to detect a minimal important change (MIC) in KOOS<sub>4</sub>  
6  
7 427 of 9-points in patients following ACLR (with standard deviation of 15) [39, 61].  
8  
9

10 428

### 11 429 **Stopping rule**

12  
13  
14 430 If the intended sample size is not reached at 36 months after recruitment commencement, the  
15  
16 431 inclusion of participants will stop at 160, which will ensure a power of 80% for the primary outcome of  
17  
18 432 KOOS<sub>4</sub>, anticipating up to 20% loss to follow-up. Including a minimum of 160 participants will also  
19  
20 433 provide ≥90% power to detect a statistically significant difference ( $\alpha=0.05$ ) on the secondary outcome  
21  
22 434 of cartilage quality on MRI (change in cartilage T2 relaxation time) between the SUPER intervention  
23  
24 435 and minimal intervention control groups (anticipated effect size of 0.59) [19].  
25  
26  
27  
28 436

### 29 30 437 **Statistical analyses**

31  
32 438 Analysis will be performed according to the intention-to-treat principle with the statistical analyst  
33  
34 439 blinded to group allocation. Descriptive statistics and generalised linear mixed models (adjusted for  
35  
36 440 baseline measure and referral source (private versus public) as fixed effects) will be used to examine  
37  
38 441 the effect of group allocation on the primary and secondary outcomes. For binomial secondary  
39  
40 442 outcomes (e.g., cartilage defect worsening, proportion of participants 'improved' on the global rating  
41  
42 443 of change scale, proportion of participants who had a KOOS<sub>4</sub> change exceeding the MIC of 9 points),  
43  
44 444 binomial (logistic) family will be selected. As this is a randomised trial, we do not plan to adjust for  
45  
46 445 other potential confounders (e.g., age, sex), but if notable imbalance between groups in potential  
47  
48 446 confounders is observed, we will examine the effect of adjusting for potential confounders (fixed  
49  
50 447 effects) [62]. While the primary analysis approach is intention-to-treat, per-protocol analysis will also  
51  
52 448 be conducted excluding those who have inadequate adherence with the SUPER intervention to assist  
53  
54 449 with clinical interpretation of findings. Planned exploratory sub-group analyses including repeating  
55  
56 450 analysis by injury characteristics (e.g., isolated vs combined ACL injury) will be conducted given the  
57  
58  
59  
60



1  
2  
3 451 known risk of a combined injury (e.g., concomitant meniscal/cartilage) on OA outcomes[63]. Two  
4  
5 452 sensitivity analyses are planned. The first will use multiple imputation for missing data, assuming this  
6  
7 453 data is considered missing at random. The second will exclude participants who experienced a  
8  
9 454 subsequent new acute traumatic lower-limb injury (or surgery) severe enough to require a period of  
10  
11 455 non-weight bearing assuming this may have influenced the outcomes of those participants, unless the  
12  
13 456 injury was sustained while completing the trial intervention activities.  
14  
15  
16  
17 457

### 18 458 **Healthcare resource use and productivity**

19  
20  
21 459 The resources required to deliver each intervention and treatment related healthcare resource use  
22  
23 460 including co-interventions for knee-related symptoms (e.g., medicines, complementary treatments,  
24  
25 461 and details of hospital presentations) will be recorded. This information will be collected from several  
26  
27 462 sources (Medicare and Pharmaceutical Benefits Scheme (MBS and PBS) databases (rebated and out-  
28  
29 463 of-pocket costs), as well as participant logbooks and questionnaires) for the trial period. The Health  
30  
31 464 and Labour Questionnaire [64] and the Work Limitations Questionnaire [65] will also be collected for  
32  
33 465 the trial period to inform estimates of productivity losses. Methods of cost-effectiveness analysis will  
34  
35 466 be reported elsewhere.  
36  
37  
38  
39 467

### 40 41 468 **Process Evaluation**

42  
43 469 Semi-structured interviews will be conducted on a subset of participants (until data saturation is  
44  
45 470 reached) following the intervention. Interviews will explore beliefs/experiences; knowledge and  
46  
47 471 understanding of interventions received including potential benefits; acceptability and perceived  
48  
49 472 effectiveness of the intervention; and reasons for adhering (or not) to exercise-therapy and education  
50  
51 473 provided. Purposive sampling will be used to recruit interview participants based upon characteristics  
52  
53 474 and outcomes of trial. Interviews will be audio recorded, transcribed and analysed using Framework  
54  
55 475 Analysis [66]. Data will be coded deductively according to the code structure generated by the  
56  
57 476 interview topic guide and an inductive thematic analysis will be applied until no new themes emerge.  
58  
59  
60

1  
2  
3 477  
45 478 **PATIENT AND PUBLIC INVOLVEMENT**  
6

7 479 Patients and clinicians are integral throughout each stage of this project. Patients and clinicians co-  
8  
9 480 designed the intervention, research questions and study methods. This input was gained from: i)  
10  
11 481 discussions with leading clinicians managing ACL injuries during SUPER development; ii) collation of  
12  
13 482 orthopaedic surgeon patient education material to inform the control intervention; iii) qualitative  
14  
15 483 interviews with participants and treating physiotherapists from our pilot study as part of formal  
16  
17 484 process evaluation strategies [23]; iv) qualitative interviews with symptomatic patients with an ACLR  
18  
19 485 as part of our previous studies [67]; and v) patient and clinician focus groups providing feedback on  
20  
21 486 study recruitment material, participant handbooks and education content. Preliminary results will be  
22  
23 487 presented and discussed with patient representatives before the results are written up for peer-  
24  
25 488 review publication. Patients and clinicians will provide input into the dissemination of study results  
26  
27 489 by assisting with the decision on what information to share and in what format.  
28  
29  
30  
31

32 490  
3334 491 **ETHICS AND DISSEMINATION**  
35

36 492 This study complies with the Declaration of Helsinki and has been approved by the La Trobe University  
37  
38 493 Human Research Ethics Committee (HEC-19447), the Alfred Hospital Ethics Committee (HREC 537/19)  
39  
40 494 and Services Australia External Request Evaluation Committee (RMS0879). Written informed consent  
41  
42 495 will be obtained from participants prior to enrolment (Supplementary File 6).  
43  
44  
45

46 496  
47

48 497 Study outcomes will be widely disseminated through a variety of sources. Primary and key secondary  
49  
50 498 objectives will be submitted to a peer-reviewed journal. Other secondary objectives will be addressed  
51  
52 499 in separate publications. Authorship will be in accordance with guidelines provided by the  
53  
54 500 International Committee of Medical Journal Editors (ICMJE). Our publication strategy will be  
55  
56 501 complemented by submission of abstracts to key national and international conferences. Any  
57  
58  
59  
60

1  
2  
3 502 important protocol amendments will be reported to the approving ethics committees, registered at  
4  
5 503 ANZCTR and communicated in the primary RCT report.  
6

7 504  
8

9  
10 505 **DISCUSSION**

11  
12 506 Anterior cruciate ligament injuries and subsequent reconstructions have increased 43% in Australia  
13  
14 507 over the previous 15 years [68], with similar increases observed in the United States[69], and greater  
15  
16 508 increases in England [70]. Half of all patients undergoing ACLR will have a poor long-term outcome  
17  
18 509 including persistent symptoms, impaired quality of life and accelerated structural decline [5-7, 71]. This  
19  
20 510 underscores an urgent need for secondary prevention strategies to prevent symptomatic and  
21  
22 511 structural OA decline – an epidemic of young people with old knees.  
23

24  
25 512  
26

27 513 The current RCT will be the first to evaluate the symptomatic and structural benefits of a  
28  
29 514 physiotherapist-supervised exercise-therapy and education intervention for young adults at high risk  
30  
31 515 of post-traumatic knee OA. While outcome assessors are blinded to group allocation and  
32  
33 516 physiotherapists delivering the intervention are blinded to the control intervention, owing to the  
34  
35 517 type of interventions (i.e., exercise-therapy and education), blinding of participants is not possible.  
36  
37

38 518 The difference in frequency of physiotherapy sessions between the two groups means that the  
39  
40 519 contextual effects related to supervised physiotherapy treatment are also not able to be isolated. We  
41  
42 520 did not include a wait-list control group as this would have reduced equipoise and increased the risk  
43  
44 521 of resentful demoralisation (if used instead of our minimal intervention control) and considerably  
45  
46 522 increased the required sample size (if used as a third comparator group). Furthermore, only patient-  
47  
48 523 reported outcomes are collected at 2-month follow-up to minimise participant burden. We also  
49  
50 524 acknowledge that the wrist-worn activity tracker (Garmin vívofit® 4) or other commercial devices  
51  
52 525 that participants wear may under-/over-estimate daily step counts, however the differences with  
53  
54 526 research-grade accelerometers appear minimal [72]. This fully powered Phase III trial represents an  
55  
56  
57  
58  
59  
60

1  
2  
3 527 important step towards optimising management to achieve better outcomes and curtail the rapid  
4  
5 528 trajectory of post-traumatic knee OA following ACL injury and reconstruction.

6  
7 529

8  
9  
10 530 **AUTHOR CONTRIBUTIONS**

11  
12 531 AGC, KMC, CJB, EMR, EO, SMM conceived the study and obtained funding. AGC, KMC and CJB designed  
13  
14 532 the study protocol with input from EMR, EO, SMM. SMM provided statistical expertise and will conduct  
15  
16 533 primary statistical analysis. EO, RBS and JL provided imaging expertise and will lead imaging analysis.  
17  
18 534 AGC drafted the manuscript with input from TJW, KMC, CJB, EMR, EO, SMM, RBS, JL, AMB, BEP, MAG,  
19  
20 535 JLC, MJS. All authors have read and approved the final manuscript.

21  
22  
23 536

24  
25 537 **FUNDING STATEMENT**

26  
27  
28 538 This trial is supported by the National Health and Medical Research Council (NHMRC) of Australia (ID:  
29  
30 539 1158500). AGC is a recipient of an NHMRC Investigator Grant (GNT2008523), CJB was a recipient of a  
31  
32 540 Medical Research Future Fund Translating Research Into Practice (MRFF TRIP) Fellowship (ID:  
33  
34 541 1150439). The funders have no role in the study design and will not have any role in its execution,  
35  
36 542 data management, analysis and interpretation or on the decision to submit the results for  
37  
38 543 publication.

39  
40  
41 544

42  
43 545 **COMPETING INTERESTS STATEMENT**

44  
45 546 CJB is the owner of a business providing physiotherapy treatment and exercise classes for some  
46  
47 547 participants enrolled in this study. CJB will have no role in the decision of which clinic participants  
48  
49 548 attend for study treatment. All other authors declare no competing interests.

50  
51  
52 549

53  
54 550 **ACKNOWLEDGEMENTS**

55  
56  
57 551 We thank physiotherapists, Mick Hughes and Randall Cooper, for assistance in intervention design. We  
58  
59 552 thank the orthopaedic surgeons assisting with participant recruitment: Hayden Morris, Chris  
60

1  
2  
3 553 Kondogiannis, Nathan White, Mark O’Sullivan, Matthew Evans, Ashley Carr, Justin Wong, Dirk van  
4  
5 554 Bavel, Matthew Alexander, Ben Campbell, Altay Altuntas, Simon Talbot, Raphael Hau, Luke Spencer,  
6  
7 555 David Mitchell. We thank the staff at each of the public hospitals involved in participant recruitment:  
8  
9 556 Lara Kimmel & Susan Liew (Alfred Hospital), Emily Cross & Andrew Bucknill (Royal Melbourne Hospital),  
10  
11 557 Jimmy Goulis & Juliette Gentle (Northern Hospital), Chris Cimoli, David Berlowitz & Andrew Hardidge  
12  
13 558 (Austin Hospital), Peter Choong (St Vincent’s Hospital), Leanne Roddy & Raphael Hau (Box Hill  
14  
15 559 Hospital), Libby Spiers & Phong Tran (Footscray Hospital), Peter Schoch, Katelyn Bailey, Caitlin Knee &  
16  
17 560 Richard Page (Barwon Hospital), Leonie Lewis & David Mitchell (Ballarat Hospital). We thank the  
18  
19 561 physiotherapists involved in treating the participants at Complete Sports Care, Clifton Hill  
20  
21 562 Physiotherapy, Flex Out Physiotherapy, Lake Health Group, Melbourne Sports Physiotherapy, Mill Park  
22  
23 563 Physiotherapy, Symmetry Physiotherapy, Grand Slam Physiotherapy, Melbourne Sports Medicine  
24  
25 564 Centre, Southern Suburbs Physiotherapy Centre, Lifecare La Trobe.  
26  
27  
28  
29  
30  
31  
32  
33

## 34 567 **FIGURE LEGENDS**

35  
36 568 **Figure 1.** Flow of participants through the study. MRI, magnetic resonance imaging; KOOS, Knee injury  
37  
38 569 and Osteoarthritis Outcome Score.

39  
40 570 **Figure 2.** Magnetic resonance imaging protocol. A) Sagittal fast spoiled gradient echo (FSPGR)  
41  
42 571 sequence; B) Sagittal, coronal and axial proton density weight far suppressed spin-echo sequence; and  
43  
44 572 C) Sagittal mulit-echo spin-echo sequence  
45  
46  
47

48 573

49 574

50 575

## 51 576 **SUPPLEMENTARY FILES**

52  
53 577 **Supplementary File 1.** Overview of SUPER intervention exercise delivery according to Consensus on  
54  
55 578 Exercise Reporting Template (CERT) guidelines  
56  
57  
58  
59  
60

- 1  
2  
3 579 **Supplementary File 2.** Exercises and logbook for SUPER intervention  
4  
5 580 **Supplementary File 3.** Exercises and logbook for minimal intervention control  
6  
7 581 **Supplementary File 4.** Details of physical performance tests  
8  
9 582 **Supplementary File 5.** Details of magnetic resonance imaging sequences acquired  
10  
11 583 **Supplementary File 6.** Patient information and consent form  
12  
13  
14 584

15  
16 585 **REFERENCES**

- 17  
18  
19 586 1. Griffin, L.Y., et al., *Noncontact anterior cruciate ligament injuries: risk factors and prevention.* Journal of the American Academy of Orthopaedic Surgeons, 2000. **8**(3): p. 141-150.  
20 587  
21 588 2. Culvenor, A.G. and K.M. Crossley, *Accelerated return to sport after anterior cruciate ligament*  
22 589 *injury: a risk factor for early knee osteoarthritis?* British Journal of Sports Medicine, 2016. **50**:  
23 590 p. 260-1.  
24 591 3. Ardern, C.L., et al., *Fifty-five per cent return to competitive sport following anterior cruciate*  
25 592 *ligament reconstruction surgery: an updated systematic review and metaanalysis including*  
26 593 *aspects of physical functioning and contextual factors.* British Journal of Sports Medicine,  
27 594 2014. **48**: p. 1543-1552.  
28 595 4. Culvenor, A.G., et al., *Is patellofemoral joint osteoarthritis an under-recognised outcome of*  
29 596 *anterior cruciate ligament reconstruction? A narrative literature review.* British Journal of  
30 597 Sports Medicine, 2013. **47**(2): p. 66-70.  
31 598 5. Culvenor, A.G., et al., *Patellofemoral osteoarthritis is prevalent and associated with worse*  
32 599 *symptoms and function after hamstring tendon autograft ACL reconstruction.* British Journal  
33 600 of Sports Medicine, 2014. **48**(6): p. 435-439.  
34 601 6. Filbay, S.R., et al., *Quality of life in anterior cruciate ligament-deficient individuals: a*  
35 602 *systematic review and meta-analysis.* British Journal of Sports Medicine, 2015. **49**: p. 1033-  
36 603 1041.  
37 604 7. Lohmander, L.S., et al., *The long-term consequence of anterior cruciate ligament and*  
38 605 *meniscus injuries.* American Journal of Sports Medicine, 2007. **35**(10): p. 1756-1769.  
39 606 8. Patterson, B.E., et al., *Patient-reported outcomes one to five years after anterior cruciate*  
40 607 *ligament reconstruction: the effect of combined injury and associations with osteoarthritis*  
41 608 *features defined on magnetic resonance imaging.* Arthritis Care & Research, 2020. **72**: p. 412-  
42 609 22.  
43 610 9. Lane, N.E., et al., *OARSI-FDA initiative: defining the disease state of osteoarthritis.*  
44 611 *Osteoarthritis and Cartilage*, 2011. **19**: p. 478-482.  
45 612 10. Emery, C.A., et al., *OARSI Clinical Trials Recommendations: design and conduct of clinical*  
46 613 *trials for primary prevention of osteoarthritis by joint injury prevention in sport and*  
47 614 *recreation.* Osteoarthritis and Cartilage, 2015. **23**: p. 815-825.  
48 615 11. Whittaker, J.L., et al., *OPTIKNEE 2022: consensus recommendations to optimise knee health*  
49 616 *after traumatic knee injury to prevent osteoarthritis.* British Journal of Sports Medicine, 2022.  
50 617 **56**: p. 1393-405.  
51 618 12. Juhl, C.B., et al., *Impact of exercise type and dose on pain and disability in knee osteoarthritis:*  
52 619 *a systematic review and meta-regression analysis of randomized controlled trials.* Arthritis &  
53 620 Rheumatology, 2014. **66**(3): p. 622-636.  
54 621 13. Roos, E.M. and N.K. Arden, *Strategies for the prevention of knee osteoarthritis.* Nature  
55 622 Reviews Rheumatology, 2016. **12**: p. 92-101.  
56  
57  
58  
59  
60

- 1  
2  
3 623 14. Pollard, T.C.B., S.E. Gwilym, and A.J. Carr, *The assessment of early osteoarthritis*. Journal of  
4 624 Bone and Joint Surgery, 2008. **90B**: p. 411-421.
- 5 625 15. Culvenor, A.G., et al., *Rehabilitation after anterior cruciate ligament and meniscal injuries: a*  
6 626 *best-evidence synthesis of systematic reviews for the OPTIKNEE consensus*. British Journal of  
7 627 Sports Medicine, 2022. **56**: p. 1445-53.
- 8 628 16. Culvenor, A.G., et al., *Knee extensor strength and risk of structural, symptomatic and*  
9 629 *functional decline in knee osteoarthritis: a systematic review and meta-analysis*. Arthritis  
10 630 Care & Research, 2017. **69**: p. 649-658.
- 11 631 17. Roos, E.M. and L.E. Dahlberg, *Positive effects of moderate exercise on glycosaminoglycan*  
12 632 *content in knee cartilage: a four-month, randomized, controlled trial in patients at risk of*  
13 633 *osteoarthritis*. Arthritis & Rheumatism, 2005. **52**(11): p. 3507-3514.
- 14 634 18. Munukka, M., et al., *Efficacy of progressive aquatic resistance training for tibiofemoral*  
15 635 *cartilage in postmenopausal women with mild knee osteoarthritis: a randomised controlled*  
16 636 *trial*. Osteoarthritis and Cartilage, 2016. **24**: p. 1708-17.
- 17 637 19. Koli, J., et al., *Effects of exercise on patellar cartilage in women with mild knee osteoarthritis*.  
18 638 *Medicine and Science in Sports and Exercise*, 2015. **47**(9): p. 1767-74.
- 19 639 20. Group, M.K., et al., *Ten-year outcomes and risk factors after anterior cruciate ligament*  
20 640 *reconstruction: A MOON longitudinal prospective cohort study*. American Journal of Sports  
21 641 *Medicine*, 2018. **46**: p. 815-25.
- 22 642 21. Patterson, B.E., et al., *Poor functional performance 1 year after ACL reconstruction increases*  
23 643 *the risk of early osteoarthritis progression*. British Journal of Sports Medicine, 2020. **54**: p.  
24 644 549-55.
- 25 645 22. Wang, Y., et al., *Knee pain as a predictor of structural progression over 4 years: data from the*  
26 646 *Osteoarthritis Initiative, a prospective cohort study*. Arthritis Research and Therapy, 2018. **20**:  
27 647 p. 250.
- 28 648 23. Patterson, B.E., et al., *Exercise-therapy and education for individuals one year after anterior*  
29 649 *cruciate ligament reconstruction: a pilot randomised controlled trial*. BMC Musculoskeletal  
30 650 *Disorders*, 2021. **22**: p. 64.
- 31 651 24. Chan, A.W., et al., *SPIRIT 2013 explanation and elaboration: guidance for protocols of clinical*  
32 652 *trials*. BMJ, 2013. **346**: p. e7586.
- 33 653 25. Moher, D., et al., *CONSORT 2010 Explanation and Elaboration: updated guidelines for*  
34 654 *reporting parallel group randomised trials*. BMJ, 2010. **340**: p. c869.
- 35 655 26. Hoffmann, T.C., et al., *Better reporting of interventions: template for intervention description*  
36 656 *and replication (TIDieR) checklist and guide*. BMJ, 2014. **348**: p. g1687.
- 37 657 27. Slade, S.C., et al., *Consensus on Exercise Reporting Template (CERT): Explanation and*  
38 658 *Elaboration Statement*. British Journal of Sports Medicine, 2016. **50**: p. 1428-37.
- 39 659 28. Culvenor, A.G., et al., *Early knee osteoarthritis is evident one year following anterior cruciate*  
40 660 *ligament reconstruction: A magnetic resonance imaging evaluation*. Arthritis &  
41 661 *Rheumatology*, 2015. **67**(4): p. 946-955.
- 42 662 29. Culvenor, A.G., et al., *Early patellofemoral osteoarthritis features one year after anterior*  
43 663 *cruciate ligament reconstruction: Symptoms and quality of life at three years*. Arthritis Care &  
44 664 *Research*, 2015. **68**: p. 784-792.
- 45 665 30. Jarvinen, T.L.N., et al., *Blinded interpretation of study results can feasibly and effectively*  
46 666 *diminish interpretation bias*. Journal of Clinical Epidemiology, 2014. **67**: p. 769-72.
- 47 667 31. Andrade, R., et al., *How should clinicians rehabilitate patients after ACL reconstruction? A*  
48 668 *systematic review of clinical practice guidelines (CPGs) with a focus on quality appraisal*  
49 669 *(AGREE II)*. British Journal of Sports Medicine, 2020. **54**: p. 512-9.
- 50 670 32. Skou, S.T. and E.M. Roos, *Good life with osteoArthritis in Denmark (GLA:D™): evidence-based*  
51 671 *education and supervised neuromuscular exercise delivered by certified physiotherapists*  
52 672 *nationwide*. BMC Musculoskeletal Disorders, 2017. **18**: p. 72.

1  
2  
3  
4  
5  
6  
7  
8  
9  
10  
11  
12  
13  
14  
15  
16  
17  
18  
19  
20  
21  
22  
23  
24  
25  
26  
27  
28  
29  
30  
31  
32  
33  
34  
35  
36  
37  
38  
39  
40  
41  
42  
43  
44  
45  
46  
47  
48  
49  
50  
51  
52  
53  
54  
55  
56  
57  
58  
59  
60

- 673 33. Skou, S.T. and J.B. Thorlund, *A 12-week supervised exercise therapy program for young adults with a meniscal tear: Program development and feasibility study*. *Journal of Bodywork and Movement Therapies*, 2018. **22**: p. 786-91.
- 674  
675  
676 34. *American College of Sports Medicine position stand. Progression models in resistance training for healthy adults*. *Medicine and Science in Sports and Exercise*, 2009. **41**: p. 687-708.
- 677  
678 35. Whittaker, J.L. and E.M. Roos, *A pragmatic approach to prevent post-traumatic osteoarthritis after sport or exercise-related joint injury*. *Best Practice & Research Clinical Rheumatology*, 2019. **33**: p. 158-71.
- 679  
680  
681 36. Harris, P.A., et al., *The REDCap consortium: Building an international community of software platform partners*. *Journal of Biomedical Informatics*, 2019. **95**: p. 103208.
- 682  
683 37. Gudbergesen, H., et al., *Test-retest of computerized health status questionnaires frequently used in the monitoring of knee osteoarthritis: a randomized crossover trial*. *BMC Musculoskeletal Disorders*, 2011. **12**(1): p. 190.
- 684  
685  
686 38. Davis, T.C., et al., *Rapid assessment of literacy levels of adult primary care patients*. *Family Medicine*, 1991. **23**: p. 433-5.
- 687  
688 39. Frobell, R., et al., *A randomized trial of treatment for acute anterior cruciate ligament tears*. *New England Journal of Medicine*, 2010. **363**: p. 331-342.
- 689  
690 40. Roos, E.M., et al., *Knee Injury and Osteoarthritis Outcome Score (KOOS). Development of a self-administered outcome measure*. *Journal of Orthopaedic & Sports Physical Therapy*, 1998. **78**: p. 88-96.
- 691  
692  
693 41. Collins, N.J., et al., *Knee Injury and Osteoarthritis Outcome Score (KOOS): systematic review and meta-analysis of measurement properties*. *Osteoarthritis and Cartilage*, 2016. **24**: p. 1317-29.
- 694  
695  
696 42. Drouin, J.M., et al., *Reliability and validity of the Biodex system 3 pro isokinetic dynamometer velocity, torque and position measurements*. *European Journal of Applied Physiology*, 2004. **91**: p. 22-9.
- 697  
698  
699 43. Culvenor, A.G., et al., *Predictors and effects of patellofemoral pain following hamstring-tendon ACL reconstruction*. *Journal of Science and Medicine in Sport*, 2015. **19**(7): p. 518-23.
- 700  
701 44. Patterson, B.E., et al., *Limb symmetry index on a functional test battery improves between one and five years after anterior cruciate ligament reconstruction, primarily due to worsening contralateral limb function*. *Physical Therapy in Sport*, 2020. **44**: p. 67-74.
- 702  
703  
704 45. Gustavsson, A., et al., *A test battery for evaluating hop performance in patients with an ACL injury and patients who have undergone ACL reconstruction*. *Knee Surgery, Sports Traumatology, Arthroscopy*, 2006. **14**(8): p. 778-788.
- 705  
706  
707 46. Ingelsrud, L.H., et al., *Proportion of patients reporting acceptable symptoms or treatment failure and their associated KOOS values at 6 and 24 months after anterior cruciate ligament reconstruction: a study from the Norwegian Knee Ligament Registry*. *American Journal of Sports Medicine*, 2015. **43**: p. 1902-7.
- 708  
709  
710  
711 47. Oei, E.H.G., et al., *Quantitative radiologic imaging techniques for articular cartilage composition: toward early diagnosis and development of disease-modifying therapeutics for osteoarthritis*. *Arthritis Care & Research*, 2014. **66**: p. 1129-41.
- 712  
713  
714 48. Culvenor, A.G., et al., *Loss of patellofemoral cartilage thickness over 5 years following ACL injury depends on the initial treatment strategy: results from the KANON trial*. *British Journal of Sports Medicine*, 2019. **53**: p. 1168-73.
- 715  
716  
717 49. Hunter, D.J., et al., *Evolution of semi-quantitative whole joint assessment of knee OA: MOAKS (MRI Osteoarthritis Knee Score)*. *Osteoarthritis and Cartilage*, 2011. **19**: p. 990-1002.
- 718  
719 50. Roemer, F.W., et al., *Anterior Cruciate Ligament OsteoArthritis Score (ACLOAS): Longitudinal MRI-based whole joint assessment of anterior cruciate ligament injury*. *Osteoarthritis and Cartilage*, 2014. **22**(5): p. 668-682.
- 720  
721  
722 51. Runhaar, J., et al., *How to define subregional osteoarthritis progression using semi-quantitative MRI Osteoarthritis Knee Score (MOAKS)*. *Osteoarthritis and Cartilage*, 2014. **22**: p. 1533-6.
- 723  
724



- 1  
2  
3 725 52. Liao, T.C., et al., *Longitudinal analysis of the contribution of 3D patella and trochlear bone*  
4 726 *shape on patellofemoral joint osteoarthritic features*. Journal of Orthopaedic Research, 2021.  
5 727 **39**: p. 506-15.
- 6 728 53. Woby, S.R., et al., *Psychometric properties of the TSK-11: a shortened version of the Tampa*  
7 729 *scale for kinesiophobia*. Pain, 2005. **117**(1-2): p. 137-144.
- 8 730 54. French, D.J., et al., *Fear of movement/(re) injury in chronic pain: a psychometric assessment*  
9 731 *of the original English version of the Tampa scale for kinesiophobia (TSK)*. Pain, 2007. **127**: p.  
10 732 42-51.
- 11 733 55. Roelofs, J., et al., *The Tampa Scale for Kinesiophobia: further examination of psychometric*  
12 734 *properties in patients with chronic low back pain and fibromyalgia*. European Journal of Pain,  
13 735 2004. **8**: p. 495-502.
- 14 736 56. Briggs, K.K., et al., *The reliability, validity, and responsiveness of the Lysholm Score and*  
15 737 *Tegner Activity Scale for anterior cruciate ligament injuries of the knee*. American Journal of  
16 738 Sports Medicine, 2009. **37**(5): p. 890-897.
- 17 739 57. Mohtadi, N., *Development and validation of the quality of life outcome measure*  
18 740 *(questionnaire) for chronic anterior cruciate ligament deficiency*. American Journal of Sports  
19 741 Medicine, 1998. **26**(3): p. 350-359.
- 20 742 58. Rabin, R. and F. de Charro, *EQ-5D: a measure of health status from the EuroQol Group*.  
21 743 Annals of Medicine, 2001. **33**(5): p. 337-343.
- 22 744 59. Fransen, M. and J. Edmonds, *Reliability and validity of the EuroQol in patients with*  
23 745 *osteoarthritis of the knee*. Rheumatology, 1999. **38**: p. 807-13.
- 24 746 60. Lafave, M.R., et al., *Validity, reliability, and responsiveness of the anterior cruciate ligament*  
25 747 *quality of life measure: a continuation of its overall validation*. Clinical Journal of Sport  
26 748 Medicine, 2017. **27**(1): p. 57-63.
- 27 749 61. Roos, E.M., et al., *It is good to feel better, but better to feel good: whether a patient finds*  
28 750 *treatment 'successful' or not depends on the questions researchers ask*. British Journal of  
29 751 Sports Medicine, 2019. **53**: p. 1474-8.
- 30 752 62. Bruder, A.M., et al., *Let's talk about sex (and gender) after ACL injury. A systematic review*  
31 753 *and meta-analysis of self-reported activity and knee-specific outcomes*. British Journal of  
32 754 Sports Medicine, 2023. **in press**.
- 33 755 63. Risberg, M.A., et al., *Changes in knee osteoarthritis, symptoms, and function after anterior*  
34 756 *cruciate ligament reconstruction: A 20-year prospective follow-up study*. American Journal of  
35 757 Sports Medicine, 2016. **44**(5): p. 1215-24.
- 36 758 64. van Roijen, L., et al., *Labor and health status in economic evaluation of health care: The*  
37 759 *health and labor questionnaire*. International Journal of Technology Assessment in Health  
38 760 Care, 1996. **12**: p. 405-15.
- 39 761 65. Lerner, D., et al., *The work limitations questionnaire*. Medical Care, 2001. **39**: p. 72-85.
- 40 762 66. Ritchie, J. and L. Spencer, *Qualitative data analysis for applied policy research*, in *Analyzing*  
41 763 *qualitative data*, R. Burgess, Editor. 1994, Routledge: London.
- 42 764 67. Filbay, S.R., K.M. Crossley, and I.N. Ackerman, *Activity preferences, lifestyle modifications and*  
43 765 *re-injury fears influence longer-term quality of life in people with knee symptoms following*  
44 766 *anterior cruciate ligament reconstruction: a qualitative study*. Journal of Physiotherapy, 2016.  
45 767 **62**: p. 103-10.
- 46 768 68. Zbrojkiewicz, D., C. Vertullo, and J.E. Grayson, *Increasing rates of anterior cruciate ligament*  
47 769 *reconstruction in young Australians, 2000-2015*. Medical Journal of Australia, 2018. **8**: p. 354-  
48 770 8.
- 49 771 69. Mall, N.A., et al., *Incidence and trends of anterior cruciate ligament reconstruction in the*  
50 772 *United States*. American Journal of Sports Medicine, 2014. **42**(10): p. 2363-70.
- 51 773 70. Abram, S.G.F., et al., *Anterior cruciate ligament (ACL) reconstruction and meniscal repair*  
52 774 *rates have both increased in the past 20 years in England: hospital statistics from 1997 to*  
53 775 *2017*. British Journal of Sports Medicine, 2019. **epub ahead of print**.
- 54  
55  
56  
57  
58  
59  
60

1  
2  
3  
4  
5  
6  
7  
8  
9  
10  
11  
12  
13  
14  
15  
16  
17  
18  
19  
20  
21  
22  
23  
24  
25  
26  
27  
28  
29  
30  
31  
32  
33  
34  
35  
36  
37  
38  
39  
40  
41  
42  
43  
44  
45  
46  
47  
48  
49  
50  
51  
52  
53  
54  
55  
56  
57  
58  
59  
60

776 71. Culvenor, A.G., et al., *Prevalence of knee osteoarthritis features on magnetic resonance*  
777 *imaging in asymptomatic uninjured adults: a systematic review and metaanalysis*. British  
778 Journal of Sports Medicine, 2019. **53**: p. 1268-1278.  
779 72. Modave, F., et al., *Mobile device accuracy for step counting across age groups*. JMIR Mhealth  
780 Uhealth, 2017. **5**: p. e88.  
781

For peer review only



Figure 1. Flow of participants through the study. MRI, magnetic resonance imaging; KOOS, Knee injury and Osteoarthritis Outcome Score.

165x184mm (150 x 150 DPI)

1  
2  
3  
4  
5  
6  
7  
8  
9  
10  
11  
12  
13  
14  
15  
16  
17  
18  
19  
20  
21  
22  
23  
24  
25  
26  
27  
28  
29  
30  
31  
32  
33  
34  
35  
36  
37  
38  
39  
40  
41  
42  
43  
44  
45  
46  
47  
48  
49  
50  
51  
52  
53  
54  
55  
56  
57  
58  
59  
60



Figure 2. Magnetic resonance imaging protocol. A) Sagittal fast spoiled gradient echo (FSPGR) sequence; B) Sagittal, coronal and axial proton density weight far suppressed spin-echo sequence; and C) Sagittal multi-echo spin-echo sequence

407x156mm (150 x 150 DPI)

**Supplementary File 1.** Overview of SUPER intervention exercise delivery according to Consensus on Exercise Reporting Template (CERT) guidelines

| Section/Topic              | Checklist item                                                                          | SUPER Exercise Intervention Description                                                                                                                                                                                                                                                                                                                                                                                                                                                                                                                    |
|----------------------------|-----------------------------------------------------------------------------------------|------------------------------------------------------------------------------------------------------------------------------------------------------------------------------------------------------------------------------------------------------------------------------------------------------------------------------------------------------------------------------------------------------------------------------------------------------------------------------------------------------------------------------------------------------------|
| <b>WHAT:<br/>materials</b> | 1. Detailed description of the type of exercise equipment                               | <p>Various weighted equipment (e.g., dumbbells, barbells, resistance band, pin-loaded leg press, leg extension, hamstring curl machine) will be used. Participants will be provided with equipment (e.g., resistance band, 20kg adjustable dumbbells) to complete exercises at home.</p> <p>Details of equipment used are in Supplementary File 2.</p>                                                                                                                                                                                                     |
| <b>WHO:<br/>provider</b>   | 2. Detailed description of the qualifications, expertise and/or training                | <p>Approximately 30 registered physiotherapists with <math>\geq 3</math> years musculoskeletal clinical experience and work in private clinics in metropolitan and regional Victoria. All SUPER physiotherapists will complete 3 hours of online webinars and participate in a 4-hour workshop (7 hours total) before study commencement. Refresher training will be completed as required. SUPER physiotherapists will be supported with regular (approximately bi-monthly) contact by a member of the research team.</p>                                 |
| <b>HOW:<br/>delivery</b>   | 3. Describe whether exercises are performed individually or in a group                  | <p><u>Phase 1:</u> Participants will perform a mix of supervised 1:1 and small group (<math>\leq 6</math> participants) exercise sessions based on individual preference, clinic availability, and clinical reasoning by the treating physiotherapist. Participants will complete additional unsupervised sessions at home/local fitness centre (gym).</p> <p><u>Phase 2:</u> All exercises will be completed individually unless <i>a priori</i> discharge criteria are not met, in which case one supervised exercise session per week may continue.</p> |
|                            | 4. Describe whether exercises are supervised or unsupervised and how they are delivered | <p><u>Phase 1:</u> Supervised by a physiotherapist twice per week <b>AND</b> unsupervised at least once per week encouraged.</p> <p><u>Phase 2:</u> Unsupervised 2-3 times per week unless <i>a priori</i> discharge criteria are not met, in which one supervised session per week may continue.</p>                                                                                                                                                                                                                                                      |

1  
2  
3  
4  
5  
6  
7  
8  
9  
10  
11  
12  
13  
14  
15  
16  
17  
18  
19  
20  
21  
22  
23  
24  
25  
26  
27  
28  
29  
30  
31  
32  
33  
34  
35  
36  
37  
38  
39  
40  
41  
42  
43  
44  
45  
46

5. Detailed description of how adherence to exercise is measured and reported

Phase 1: Physiotherapists will record attendance at supervised exercises sessions. During supervised exercises, participants and/or physiotherapists will record dosage completed for each exercise in a clinic logbook. Participants will record unsupervised exercises either through an online exercise diary, or paper-based exercise logbook. Participants will also report their exercise adherence fortnightly via an online questionnaire.

Phase 2: Participants will report their exercise adherence monthly via an online questionnaire and/or paper-based logbook.

The percentage of supervised (and unsupervised) exercise sessions completed will be reported.

6. Detailed description of motivation strategies

Phase 1: (i) Physiotherapists will be trained to use simple motivational interviewing techniques to support intervention adherence; (ii) Functional assessments will be completed in the clinic (hop tests, one leg rise) monthly; (iii) Participants will maintain exercise training logbooks at the clinic and at home; (iv) Participants will be contacted monthly by a member of the research team; (v) Exercise variations available to cater for individual needs and preferences; (vi) Participants will be provided an activity monitor (e.g., Garmin watch) and encouraged to track daily activity; (vii) Small group exercise training with other SUPER-Knee trial participants.

Phase 2: (i) Access to a local gym; (ii) Booster session with physiotherapist, including functional re-assessment at 8 and 11 months; (iii) Followed up regularly by a member of the research team; (iv) Exercise variations available; (vi) Participants will continue using an activity monitor (e.g., Garmin watch).

7a. Detailed description of the decision rule(s) for determining exercise progression

Exercises will be progressed based on: (i) perceived difficulty using rating of perceived exertion (RPE) (e.g., RPE  $\geq 7/10$ , 3 sets of 8-12 reps and one lighter week per month of 5/10 RPE to increase motivation and allow recovery periods), and (ii) minimal pain (e.g.,  $< 3/10$  on numerical pain scale).

7b. Detailed description of how the exercise program is progressed

Exercises will be progressed to match pre-defined RPE of each week by any of the following: i) increasing load used; ii) increasing exercise difficulty level; iii) changing exercise position (e.g.,

|    |                                                                               |                                                                                                                                                                                                                                                                                                                         |
|----|-------------------------------------------------------------------------------|-------------------------------------------------------------------------------------------------------------------------------------------------------------------------------------------------------------------------------------------------------------------------------------------------------------------------|
| 1  |                                                                               | lowering squat depth, increasing step height); or iv) changing speed of exercise. Progression principles are in line with American College of Sports Medicine muscle strengthening guidelines.                                                                                                                          |
| 2  |                                                                               |                                                                                                                                                                                                                                                                                                                         |
| 3  |                                                                               |                                                                                                                                                                                                                                                                                                                         |
| 4  |                                                                               |                                                                                                                                                                                                                                                                                                                         |
| 5  |                                                                               |                                                                                                                                                                                                                                                                                                                         |
| 6  | 8. Detailed description of each exercise to enable replication                | The priority exercises are: 1) Quadriceps, 2) Knee extension, 3) Plyometrics, 4) Balance & Agility, 5) Hamstrings. The additional exercises are: 6) Trunk/core, 7) Hip abduction, 8) Hip adduction, 9) Calf raises.                                                                                                     |
| 7  |                                                                               |                                                                                                                                                                                                                                                                                                                         |
| 8  |                                                                               |                                                                                                                                                                                                                                                                                                                         |
| 9  |                                                                               |                                                                                                                                                                                                                                                                                                                         |
| 10 |                                                                               | Exercise descriptions are available in Supplementary File 2.                                                                                                                                                                                                                                                            |
| 11 |                                                                               |                                                                                                                                                                                                                                                                                                                         |
| 12 | 9. Detailed description of any home program component                         | Home exercise variations for each of the priority and additional exercises can be found in Supplementary File 2.                                                                                                                                                                                                        |
| 13 |                                                                               |                                                                                                                                                                                                                                                                                                                         |
| 14 |                                                                               |                                                                                                                                                                                                                                                                                                                         |
| 15 | 10. Describe whether there are any non-exercise components                    | Comprehensive education will be provided during the two dedicated physiotherapy 'education' consultations (Weeks 1 and 4, 30-60 minutes).                                                                                                                                                                               |
| 16 |                                                                               |                                                                                                                                                                                                                                                                                                                         |
| 17 |                                                                               |                                                                                                                                                                                                                                                                                                                         |
| 18 |                                                                               |                                                                                                                                                                                                                                                                                                                         |
| 19 |                                                                               |                                                                                                                                                                                                                                                                                                                         |
| 20 |                                                                               | Session 1 topics will include: Function and actions of the knee and ACL, mechanisms of ACL injury, risk factors, what is osteoarthritis, role and evidence for physical activity and exercise, pain education, recovery, goal setting.                                                                                  |
| 21 |                                                                               |                                                                                                                                                                                                                                                                                                                         |
| 22 |                                                                               |                                                                                                                                                                                                                                                                                                                         |
| 23 |                                                                               |                                                                                                                                                                                                                                                                                                                         |
| 24 |                                                                               |                                                                                                                                                                                                                                                                                                                         |
| 25 |                                                                               | Session 2 topics will include: Returning to physical activity and sport, psychological factors, goal re-setting and long-term planning, weight control.                                                                                                                                                                 |
| 26 |                                                                               |                                                                                                                                                                                                                                                                                                                         |
| 27 | 11. Describe the type and number of adverse events that occur during exercise | Exercise-specific adverse events are increases in pain, swelling, re-injury caused by the exercises resulting in the participant needing to cease the exercise session, or an inability to complete subsequent sessions. Physiotherapists will record exercise-specific adverse events in their clinic treatment notes. |
| 28 |                                                                               |                                                                                                                                                                                                                                                                                                                         |
| 29 |                                                                               |                                                                                                                                                                                                                                                                                                                         |
| 30 |                                                                               |                                                                                                                                                                                                                                                                                                                         |
| 31 |                                                                               |                                                                                                                                                                                                                                                                                                                         |
| 32 |                                                                               |                                                                                                                                                                                                                                                                                                                         |
| 33 |                                                                               |                                                                                                                                                                                                                                                                                                                         |
| 34 |                                                                               | For any serious adverse events, physiotherapists will contact a member of the research team immediately for suspected ACL re-injuries for medical review and incident reporting.                                                                                                                                        |
| 35 |                                                                               |                                                                                                                                                                                                                                                                                                                         |
| 36 | <b>WHERE:</b>                                                                 |                                                                                                                                                                                                                                                                                                                         |
| 37 | <b>location</b>                                                               | <u>Phase 1:</u> Exercises will be performed individually or in small groups at physiotherapy clinics under the supervision of a trained SUPER-Knee physiotherapist, and independently at home/local gym.                                                                                                                |
| 38 | 12. Describe the setting in which the exercises are performed                 |                                                                                                                                                                                                                                                                                                                         |
| 39 |                                                                               |                                                                                                                                                                                                                                                                                                                         |
| 40 |                                                                               |                                                                                                                                                                                                                                                                                                                         |
| 41 |                                                                               |                                                                                                                                                                                                                                                                                                                         |
| 42 |                                                                               |                                                                                                                                                                                                                                                                                                                         |
| 43 |                                                                               |                                                                                                                                                                                                                                                                                                                         |
| 44 |                                                                               |                                                                                                                                                                                                                                                                                                                         |
| 45 |                                                                               |                                                                                                                                                                                                                                                                                                                         |
| 46 |                                                                               |                                                                                                                                                                                                                                                                                                                         |

Phase 2: Home/local gym, unless *a priori* discharge criteria are not met, in which case supervised exercise sessions at the physiotherapy clinic may continue.

**WHEN/HOW MUCH: dosage** 13. Detailed description of the exercise intervention including, but not limited to, number of exercise repetitions/sets/session duration, intervention/program duration etc.

The priority exercises are: 1) Quadriceps, 2) Knee extension, 3) Plyometrics, 4) Balance & Agility, 5) Hamstrings. The additional exercises are: 6) Trunk/core, 7) Hip abduction, 8) Hip adduction, 9) Calf raises. Exercise descriptions are available in print (Supplementary File 2). Strength exercises will be performed in 3 sets of 8-12 reps, while power exercises will be performed in 1-3 sets of 3-6 reps based on clinical reasoning by the treating physiotherapists. Plyometric exercises will be performed in 1-3 sets of 10 reps. Session duration will be 30-60 mins depending on participant/physiotherapist availability. The entire intervention lasts for 12 months.

**TAILORING: what, how** 14a. Describe whether the exercises are generic (one size fits all) or whether tailored to the individual

The standard exercise program will include the 5 priority exercises. The additional exercises are optional to cater for individual needs, preferences, including time commitments.

Each exercise has 3-6 levels of difficulty that include options to cater for exercise training environment. Participants, with their physiotherapist, can select the exercise under each group that most suits individual needs and preferences.

14b. Detailed description of how exercises are tailored to the individual

Exercise prescription is individualised and follows guidelines from the American College of Sports Medicine for developing muscle strength and power. Exercises will be individually tailored based on: baseline assessment and ongoing functional assessment, achieving intended RPE, exercise training environment and equipment availability, clinical reasoning (e.g., individual preferences and needs, pain).

15. Describe the decision rule for determining the starting level at which people commence an exercise program

All exercise sessions will start with a 5-minute warm up (3-4/10 RPE). Strength exercises will be performed at a moderate-hard intensity (suggested 5/10 RPE) in Week 1, using guidance from baseline assessment information (e.g., strength and functional test results) contained in the handover form to physiotherapists. They will then be progressed for all participants in week 2 based on criteria outlined in 7a.



|    |                                          |                                                                                                    |
|----|------------------------------------------|----------------------------------------------------------------------------------------------------|
| 1  |                                          |                                                                                                    |
| 2  |                                          |                                                                                                    |
| 3  | <b>HOW WELL:</b>                         |                                                                                                    |
| 4  | <b>planned,</b>                          |                                                                                                    |
| 5  | <b>actual</b>                            |                                                                                                    |
| 6  | 16a. Describe how adherence or           | All SUPER-Knee physiotherapists will complete 3 hours of online webinars, attend the face-to-      |
| 7  | fidelity to the exercise intervention is | face 4-hour training workshop and receive a detailed treatment manual describing all aspects of    |
| 8  | assessed/measured                        | the exercise (and education) intervention. After initiation of the trial, communication (e.g.,     |
| 9  |                                          | telephone, email) between a member of the research team and each physiotherapist will occur        |
| 10 |                                          | to discuss issues experienced in the clinic and issues resolved as appropriate. In person fidelity |
| 11 |                                          | checks will be performed by a member of the research team and refresher training will be           |
| 12 |                                          | completed annually.                                                                                |
| 13 | 16b. Describe the extent to which the    | This will be reported in the primary paper.                                                        |
| 14 | intervention was delivered as            |                                                                                                    |
| 15 | planned                                  |                                                                                                    |
| 16 |                                          |                                                                                                    |
| 17 |                                          |                                                                                                    |
| 18 |                                          |                                                                                                    |
| 19 |                                          |                                                                                                    |
| 20 |                                          |                                                                                                    |
| 21 |                                          |                                                                                                    |
| 22 |                                          |                                                                                                    |
| 23 |                                          |                                                                                                    |
| 24 |                                          |                                                                                                    |
| 25 |                                          |                                                                                                    |
| 26 |                                          |                                                                                                    |
| 27 |                                          |                                                                                                    |
| 28 |                                          |                                                                                                    |
| 29 |                                          |                                                                                                    |
| 30 |                                          |                                                                                                    |
| 31 |                                          |                                                                                                    |
| 32 |                                          |                                                                                                    |
| 33 |                                          |                                                                                                    |
| 34 |                                          |                                                                                                    |
| 35 |                                          |                                                                                                    |
| 36 |                                          |                                                                                                    |
| 37 |                                          |                                                                                                    |
| 38 |                                          |                                                                                                    |
| 39 |                                          |                                                                                                    |
| 40 |                                          |                                                                                                    |
| 41 |                                          |                                                                                                    |
| 42 |                                          |                                                                                                    |
| 43 |                                          |                                                                                                    |
| 44 |                                          |                                                                                                    |
| 45 |                                          |                                                                                                    |
| 46 |                                          |                                                                                                    |

1  
2  
3  
4  
5  
6  
7  
8  
9  
10  
11  
12  
13  
14  
15  
16  
17  
18  
19  
20  
21  
22  
23  
24  
25  
26  
27  
28  
29  
30  
31  
32  
33  
34  
35  
36  
37  
38  
39  
40  
41  
42  
43  
44  
45  
46  
47  
48  
49  
50  
51  
52  
53  
54  
55  
56  
57  
58  
59  
60

# SUPER nee

# Participant Handbook

1  
2  
3  
4  
5  
6  
7  
8  
9  
10  
11  
12  
13  
14  
15  
16  
17  
18  
19  
20  
21  
22  
23  
24  
25  
26  
27  
28  
29  
30  
31  
32  
33  
34  
35  
36  
37  
38  
39  
40  
41  
42  
43  
44  
45  
46  
47  
48  
49  
50  
51  
52  
53  
54  
55  
56  
57  
58  
59  
60

# PRIORITY EXERCISES

For peer review only

## EXERCISE 1. QUADRICEPS

### FOCUS

- Slow & controlled
- Knees, hips, ankles in line and hips level
- Aim for 2-3 sets of 8-12 repetitions

Feet shoulder width apart. Slowly squat until your buttocks lightly touch the chair/box. Return to standing.

#### Level 1 – Double leg squat

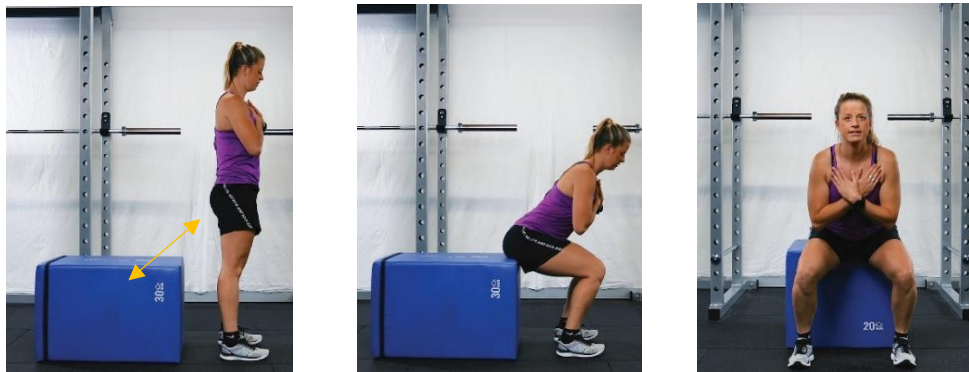

Standing on affected leg, slowly squat until your buttocks lightly touch the chair/box. Return to standing.

#### Level 2 – Single leg squat

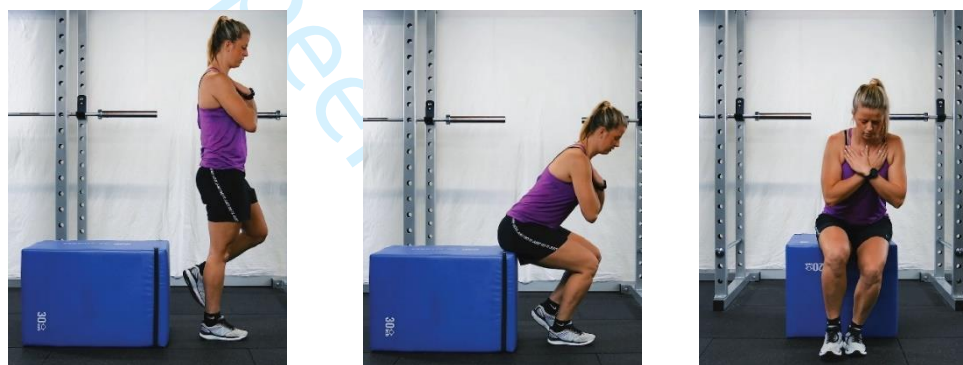

#### Level 3 – Weighted single leg squat

Increase difficulty by holding weights (on your chest, by your side, or barbell on your shoulder blades).

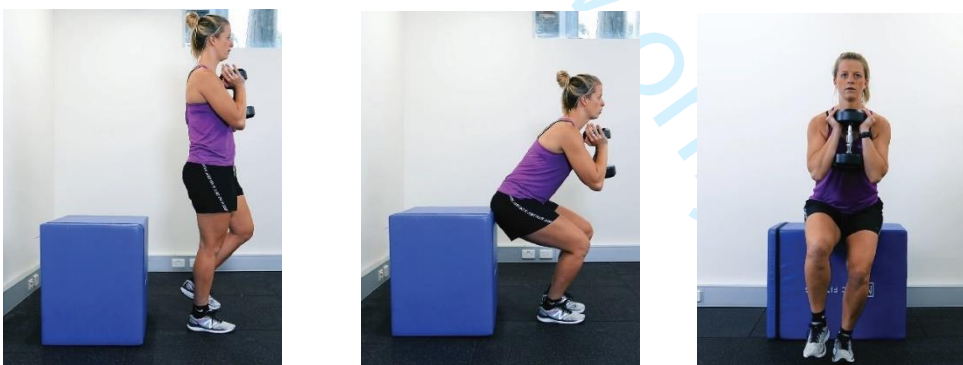

### POWER

- Combines strength and speed
- Vital for everyday activity
- Fast movements at lower weights
- Aim for 1-3 sets of 3-6 repetitions

#### Level 4 – Power Squats

- POWER: complete squats (double- or single-leg as above) with weight at speed.
- Squat down and up as quickly as possible.
- Power can start from week 4 of program regardless of completing level 3 exercise.

**Exercise 1: QUADRICEPS**
**HOME/GYM RECORD**

\* Put a line through a session if exercise not completed in that session or missed a session

|                          |                  | Level (circle) | Aim RPE | Actual RPE | Kilos used | Number of sets | Number of reps |
|--------------------------|------------------|----------------|---------|------------|------------|----------------|----------------|
| Week 1 – date:<br>_____  | Home/gym session | 1 2 3 4        | 5/10    |            |            |                |                |
|                          | Extra session    | 1 2 3 4        | 5       |            |            |                |                |
| Week 2 – date:<br>_____  | Home/gym session | 1 2 3 4        | 7       |            |            |                |                |
|                          | Extra session    | 1 2 3 4        | 7       |            |            |                |                |
| Week 3 – date:<br>_____  | Home/gym session | 1 2 3 4        | 9       |            |            |                |                |
|                          | Extra session    | 1 2 3 4        | 9       |            |            |                |                |
| Week 4 – date:<br>_____  | Home/gym session | 1 2 3 4        | 5       |            |            |                |                |
|                          | Extra session    | 1 2 3 4        | 5       |            |            |                |                |
| Week 5 – date:<br>_____  | Home/gym session | 1 2 3 4        | 7       |            |            |                |                |
|                          | Extra session    | 1 2 3 4        | 7       |            |            |                |                |
| Week 6 – date:<br>_____  | Home/gym session | 1 2 3 4        | 7       |            |            |                |                |
|                          | Extra session    | 1 2 3 4        | 7       |            |            |                |                |
| Week 7 – date:<br>_____  | Home/gym session | 1 2 3 4        | 9       |            |            |                |                |
|                          | Extra session    | 1 2 3 4        | 9       |            |            |                |                |
| Week 8 – date:<br>_____  | Home/gym session | 1 2 3 4        | 5       |            |            |                |                |
|                          | Extra session    | 1 2 3 4        | 5       |            |            |                |                |
| Week 9 – date:<br>_____  | Home/gym session | 1 2 3 4        | 7       |            |            |                |                |
|                          | Extra session    | 1 2 3 4        | 7       |            |            |                |                |
| Week 10 – date:<br>_____ | Home/gym session | 1 2 3 4        | 7       |            |            |                |                |
|                          | Extra session    | 1 2 3 4        | 7       |            |            |                |                |
| Week 11 – date:<br>_____ | Home/gym session | 1 2 3 4        | 9       |            |            |                |                |
|                          | Extra session    | 1 2 3 4        | 9       |            |            |                |                |
| Week 12 – date:<br>_____ | Home/gym session | 1 2 3 4        | 5       |            |            |                |                |
|                          | Extra session    | 1 2 3 4        | 5       |            |            |                |                |
| Week 13 – date:<br>_____ | Home/gym session | 1 2 3 4        | 7       |            |            |                |                |
|                          | Extra session    | 1 2 3 4        | 7       |            |            |                |                |
| Week 14 – date:<br>_____ | Home/gym session | 1 2 3 4        | 7       |            |            |                |                |
|                          | Extra session    | 1 2 3 4        | 7       |            |            |                |                |
| Week 15 – date:<br>_____ | Home/gym session | 1 2 3 4        | 9       |            |            |                |                |
|                          | Extra session    | 1 2 3 4        | 9       |            |            |                |                |
| Week 16 – date:<br>_____ | Home/gym session | 1 2 3 4        | 9       |            |            |                |                |
|                          | Extra session    | 1 2 3 4        | 9       |            |            |                |                |

RPE= Rating of Perceived Exertion (0=rest, 10=working as hard as possible)

# EXERCISE 1b. QUADRICEPS VARIATIONS

(extra options usually after 4 weeks of the program but based on you and your physio's preferences)

## VARIETY

- Varying your workouts can help you push past a plateau
- Challenge your muscles, force them to adapt and strengthen
- Aim for 2-3 sets of 8-12 repetitions

Option 1: Weighted double leg squat

Use a barbell with weights resting on your shoulder blades. Slowly squat to ~90° knee bend. Return to standing.

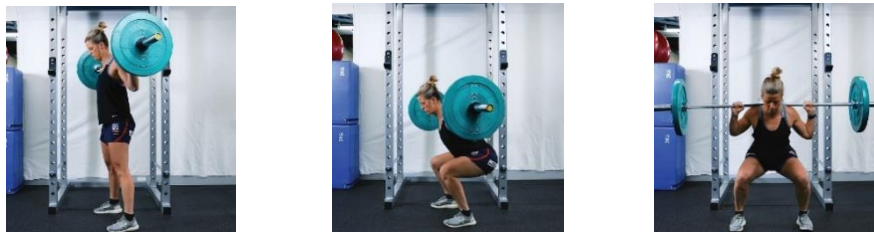

Option 2: Bulgarian split squat (hold weights for variability)

Place back foot on a step/chair. Slowly lunge down with most of your weight on your front leg. Keep your shin vertical and back upright. Hold weights to increase difficulty/variability.

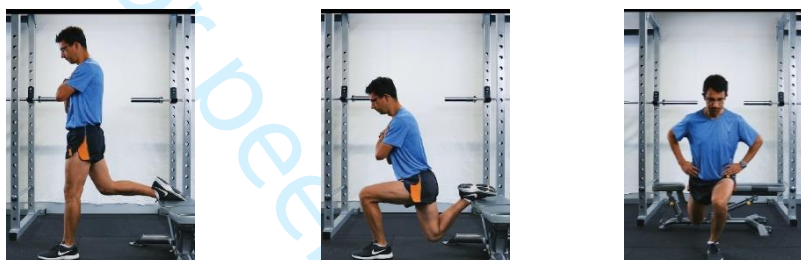

Option 3: Step ups/downs

Stand on the edge of a step, step down to lightly touch the floor behind you (or in front of you) and then straighten knee and return to standing. Increase difficulty by holding weights.

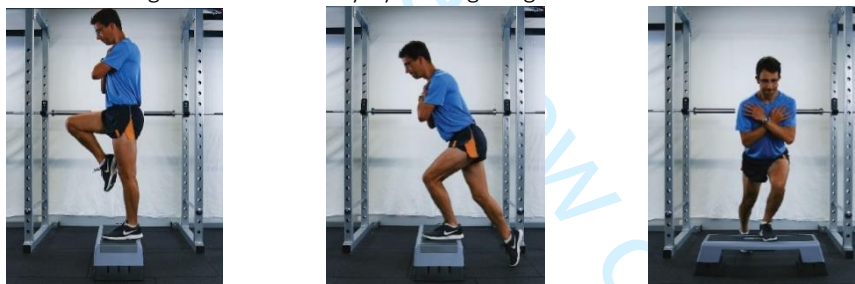

Option 4: Lunge

Step back and drop the back knee towards ground, then stand up. Increase difficulty by holding weights.

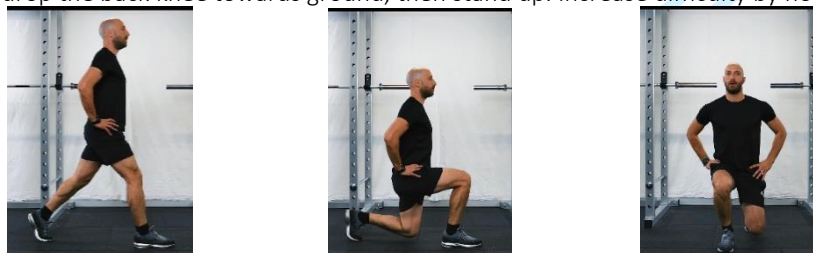

Option 5: Wall squat

Slide down until your knees are bent to 90°. Then return to the starting position. (Increase difficulty by holding weights or doing it on one leg.)

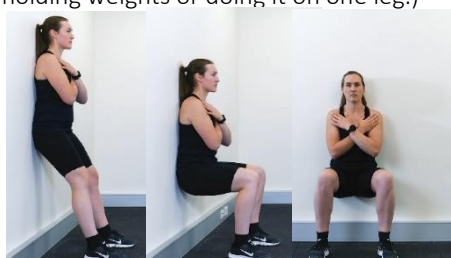

Option 6 – Single leg press

With your knee bent to 90°, push the footplate away by extending your knee (stop before locking it straight). Slowly control your knee to return to the starting position.

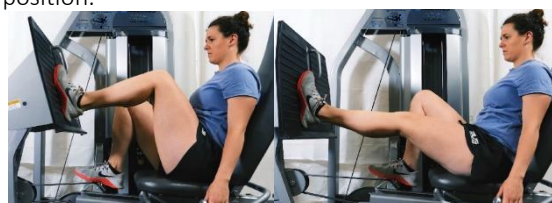

**Exercise 1b: QUADRICEPS VARIATIONS**
**HOME/GYM RECORD**

\* Integrate after 4 weeks of the program + based on you and your physio's preferences

|         |                  | Exercise (circle) | Aim RPE | Actual RPE | Kilos | Number of sets | Number of reps |
|---------|------------------|-------------------|---------|------------|-------|----------------|----------------|
| Week 1  | Home/gym session | 1 2 3 4 5 6       | 5/10    |            |       |                |                |
|         | Extra session    | 1 2 3 4 5 6       | 5       |            |       |                |                |
| Week 2  | Home/gym session | 1 2 3 4 5 6       | 7       |            |       |                |                |
|         | Extra session    | 1 2 3 4 5 6       | 7       |            |       |                |                |
| Week 3  | Home/gym session | 1 2 3 4 5 6       | 9       |            |       |                |                |
|         | Extra session    | 1 2 3 4 5 6       | 9       |            |       |                |                |
| Week 4  | Home/gym session | 1 2 3 4 5 6       | 5       |            |       |                |                |
|         | Extra session    | 1 2 3 4 5 6       | 5       |            |       |                |                |
| Week 5  | Home/gym session | 1 2 3 4 5 6       | 7       |            |       |                |                |
|         | Extra session    | 1 2 3 4 5 6       | 7       |            |       |                |                |
| Week 6  | Home/gym session | 1 2 3 4 5 6       | 7       |            |       |                |                |
|         | Extra session    | 1 2 3 4 5 6       | 7       |            |       |                |                |
| Week 7  | Home/gym session | 1 2 3 4 5 6       | 9       |            |       |                |                |
|         | Extra session    | 1 2 3 4 5 6       | 9       |            |       |                |                |
| Week 8  | Home/gym session | 1 2 3 4 5 6       | 5       |            |       |                |                |
|         | Extra session    | 1 2 3 4 5 6       | 5       |            |       |                |                |
| Week 9  | Home/gym session | 1 2 3 4 5 6       | 7       |            |       |                |                |
|         | Extra session    | 1 2 3 4 5 6       | 7       |            |       |                |                |
| Week 10 | Home/gym session | 1 2 3 4 5 6       | 7       |            |       |                |                |
|         | Extra session    | 1 2 3 4 5 6       | 7       |            |       |                |                |
| Week 11 | Home/gym session | 1 2 3 4 5 6       | 9       |            |       |                |                |
|         | Extra session    | 1 2 3 4 5 6       | 9       |            |       |                |                |
| Week 12 | Home/gym session | 1 2 3 4 5 6       | 5       |            |       |                |                |
|         | Extra session    | 1 2 3 4 5 6       | 5       |            |       |                |                |
| Week 13 | Home/gym session | 1 2 3 4 5 6       | 7       |            |       |                |                |
|         | Extra session    | 1 2 3 4 5 6       | 7       |            |       |                |                |
| Week 14 | Home/gym session | 1 2 3 4 5 6       | 7       |            |       |                |                |
|         | Extra session    | 1 2 3 4 5 6       | 7       |            |       |                |                |
| Week 15 | Home/gym session | 1 2 3 4 5 6       | 9       |            |       |                |                |
|         | Extra session    | 1 2 3 4 5 6       | 9       |            |       |                |                |
| Week 16 | Home/gym session | 1 2 3 4 5 6       | 9       |            |       |                |                |
|         | Extra session    | 1 2 3 4 5 6       | 9       |            |       |                |                |

RPE= Rating of Perceived Exertion (0=rest, 10=working as hard as possible)

## EXERCISE 2. KNEE EXTENSION

### PAIN

- Keep pain below 3/10 when exercising and pain should settle by the next day
- Pain is OK - you can be sore but safe as pain doesn't always equal damage
- Aim for 2-3 sets of 8-12 repetitions

- Knee extension machine: straighten knee against resistance, hold for 40-60 seconds then slowly return to the starting position.
- Resistance band: straighten knee against the resistance of resistance band, hold for 40-60 seconds then slowly return to the starting position.
- Cable machine: straighten knee against resistance, hold for 40-60 seconds then slowly return to the starting position.

*\*IF PAIN IS GREATER THAN 3/10 THEN YOU CAN TRY DIFFERENT KNEE ANGLES WITH GUIDANCE FROM YOUR PHYSIO*

#### Level 1 – Knee extension holds

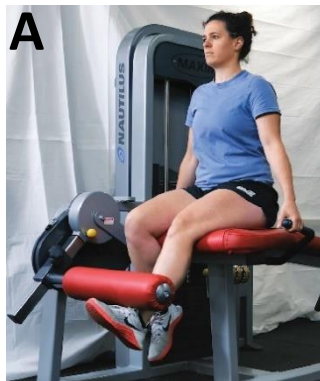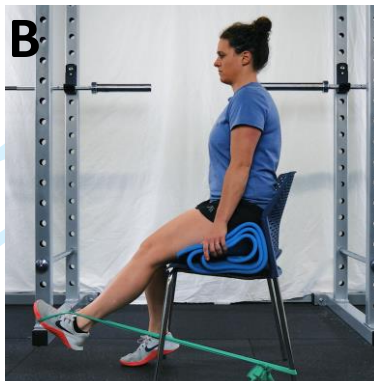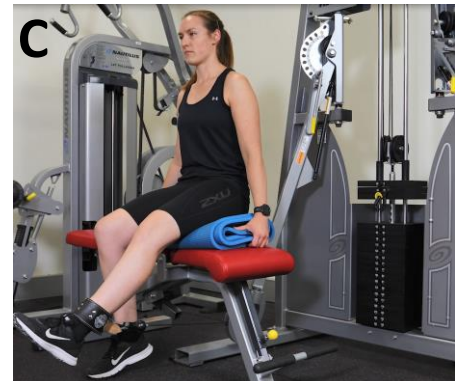

Fully straighten your knee slowly against resistance (using knee extension machine, resistance band or cable machine) and then slowly return to the starting position.

#### Level 2 – Knee extension

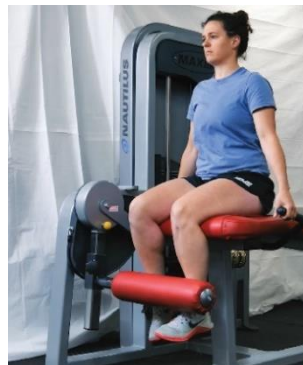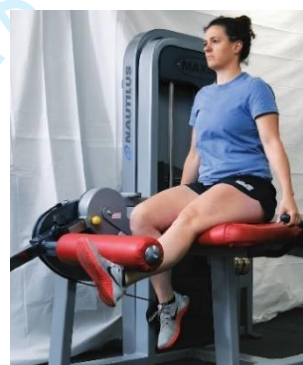

### POWER

- Combines strength and speed
- Vital for everyday activity
- Fast movements at lower weights
- Aim for 1-3 sets of 3-6 repetitions

- Using either knee extension machine, resistance band or cable machine.
- Set the weight approximately 60-70% lighter than your last strength session.
- Complete same exercise as Level 2 but faster (aim for less than 1 sec to straighten the knee).
- Slowly bend the knee back to the starting position.
- Start power from week 4 of your program.

#### Level 3 Power – Knee extension



**Exercise 2: KNEE EXTENSION**
**HOME/GYM RECORD**

|         |                  | Level (circle) | Aim RPE | Actual RPE | Kilos on affected leg | Number of sets | Number of reps |
|---------|------------------|----------------|---------|------------|-----------------------|----------------|----------------|
| Week 1  | Home/gym session | 1 2 3          | 5/10    |            |                       |                |                |
|         | Extra session    | 1 2 3          | 5       |            |                       |                |                |
| Week 2  | Home/gym session | 1 2 3          | 7       |            |                       |                |                |
|         | Extra session    | 1 2 3          | 7       |            |                       |                |                |
| Week 3  | Home/gym session | 1 2 3          | 9       |            |                       |                |                |
|         | Extra session    | 1 2 3          | 9       |            |                       |                |                |
| Week 4  | Home/gym session | 1 2 3          | 5       |            |                       |                |                |
|         | Extra session    | 1 2 3          | 5       |            |                       |                |                |
| Week 5  | Home/gym session | 1 2 3          | 7       |            |                       |                |                |
|         | Extra session    | 1 2 3          | 7       |            |                       |                |                |
| Week 6  | Home/gym session | 1 2 3          | 7       |            |                       |                |                |
|         | Extra session    | 1 2 3          | 7       |            |                       |                |                |
| Week 7  | Home/gym session | 1 2 3          | 9       |            |                       |                |                |
|         | Extra session    | 1 2 3          | 9       |            |                       |                |                |
| Week 8  | Home/gym session | 1 2 3          | 5       |            |                       |                |                |
|         | Extra session    | 1 2 3          | 5       |            |                       |                |                |
| Week 9  | Home/gym session | 1 2 3          | 7       |            |                       |                |                |
|         | Extra session    | 1 2 3          | 7       |            |                       |                |                |
| Week 10 | Home/gym session | 1 2 3          | 7       |            |                       |                |                |
|         | Extra session    | 1 2 3          | 7       |            |                       |                |                |
| Week 11 | Home/gym session | 1 2 3          | 9       |            |                       |                |                |
|         | Extra session    | 1 2 3          | 9       |            |                       |                |                |
| Week 12 | Home/gym session | 1 2 3          | 5       |            |                       |                |                |
|         | Extra session    | 1 2 3          | 5       |            |                       |                |                |
| Week 13 | Home/gym session | 1 2 3          | 7       |            |                       |                |                |
|         | Extra session    | 1 2 3          | 7       |            |                       |                |                |
| Week 14 | Home/gym session | 1 2 3          | 7       |            |                       |                |                |
|         | Extra session    | 1 2 3          | 7       |            |                       |                |                |
| Week 15 | Home/gym session | 1 2 3          | 9       |            |                       |                |                |
|         | Extra session    | 1 2 3          | 9       |            |                       |                |                |
| Week 16 | Home/gym session | 1 2 3          | 9       |            |                       |                |                |
|         | Extra session    | 1 2 3          | 9       |            |                       |                |                |

RPE= Rating of Perceived Exertion (0=rest, 10=working as hard as possible)

# EXERCISE 3. PLYOMETRIC POWER (JUMPING/HOPPING)

## FOCUS

- Soft landing bend through hips and knees to absorb load
- Alignment: knees, hips, ankles, torso in line, hips level
- **Begin with 10 repetitions and progress with guidance from your physio**

### Level 1 – Double leg forward jump

Jump as high as possible landing softly bending at the hips and knees. Keep good alignment. Progress to jumping forwards as far as possible and jumping side to side.

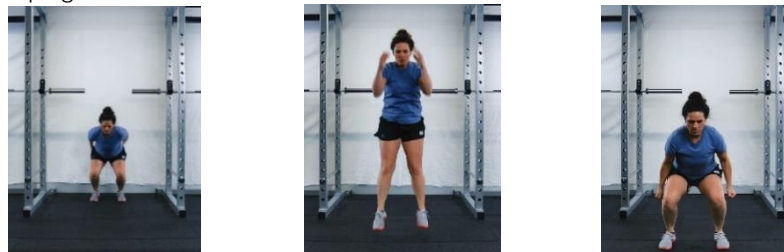

### Level 2 – Single leg hop

Hop forward on one leg landing softly bending at your hips and knees. Keep good alignment. Increase distance/speed.

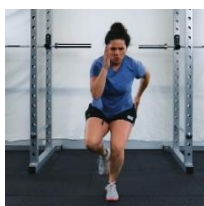

### Level 3 – Single leg side hop

Hop side-to-side on one leg landing softly on the same leg bending at your hips and knees. Increase side-to-side distance.

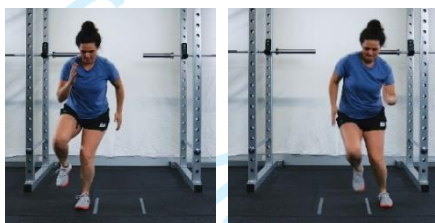

### Level 4 – Drop jumps double leg

Standing on a box, jump down landing softly on both feet and immediately jump up as high as you can. Increase height of box or hold weights to make harder. The size of the box can range from small (20cm) step to large (40-50cm as pictured).

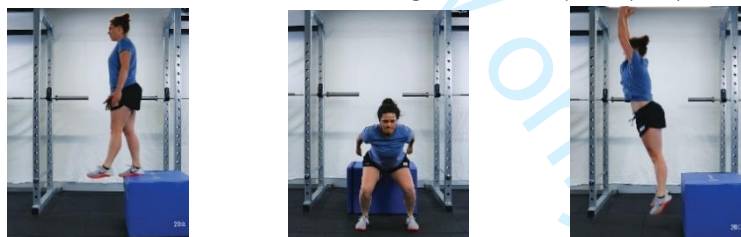

### Level 5 – Drop jumps single leg

Stand on a box/step jump down and land softly on one leg and immediately hop up as high as you can

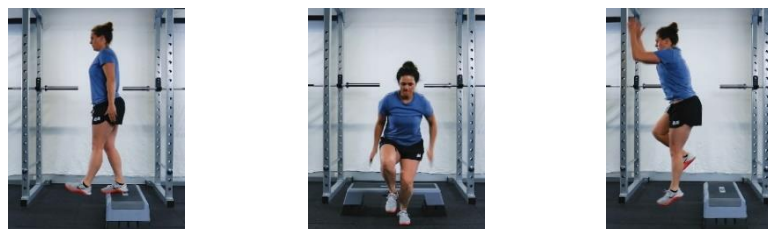

### Level 6 – Sport specific

Discuss with your physio regarding sports-specific jumping exercises based on the sport or activities you wish to do.

- Examples:
- cutting upon hop landing
  - obstacles to hop over
  - replicate light sport physical contact
  - sport-specific skill performance
  - non-contact training drills (cutting around opponent)
  - multi-directional and unanticipated exercises
  - accelerate/decelerate

**Exercise 3: PLYOMETRICS (JUMPING/HOPPING)**
**HOME/GYM RECORD**

|         |                  | Level (circle) | Aim RPE | Actual RPE | Number of sets | Number of reps |
|---------|------------------|----------------|---------|------------|----------------|----------------|
| Week 1  | Home/gym session | 1 2 3 4 5 6    | 5/10    |            |                |                |
|         | Extra session    | 1 2 3 4 5 6    | 5       |            |                |                |
| Week 2  | Home/gym session | 1 2 3 4 5 6    | 7       |            |                |                |
|         | Extra session    | 1 2 3 4 5 6    | 7       |            |                |                |
| Week 3  | Home/gym session | 1 2 3 4 5 6    | 9       |            |                |                |
|         | Extra session    | 1 2 3 4 5 6    | 9       |            |                |                |
| Week 4  | Home/gym session | 1 2 3 4 5 6    | 5       |            |                |                |
|         | Extra session    | 1 2 3 4 5 6    | 5       |            |                |                |
| Week 5  | Home/gym session | 1 2 3 4 5 6    | 7       |            |                |                |
|         | Extra session    | 1 2 3 4 5 6    | 7       |            |                |                |
| Week 6  | Home/gym session | 1 2 3 4 5 6    | 7       |            |                |                |
|         | Extra session    | 1 2 3 4 5 6    | 7       |            |                |                |
| Week 7  | Home/gym session | 1 2 3 4 5 6    | 9       |            |                |                |
|         | Extra session    | 1 2 3 4 5 6    | 9       |            |                |                |
| Week 8  | Home/gym session | 1 2 3 4 5 6    | 5       |            |                |                |
|         | Extra session    | 1 2 3 4 5 6    | 5       |            |                |                |
| Week 9  | Home/gym session | 1 2 3 4 5 6    | 7       |            |                |                |
|         | Extra session    | 1 2 3 4 5 6    | 7       |            |                |                |
| Week 10 | Home/gym session | 1 2 3 4 5 6    | 7       |            |                |                |
|         | Extra session    | 1 2 3 4 5 6    | 7       |            |                |                |
| Week 11 | Home/gym session | 1 2 3 4 5 6    | 9       |            |                |                |
|         | Extra session    | 1 2 3 4 5 6    | 9       |            |                |                |
| Week 12 | Home/gym session | 1 2 3 4 5 6    | 5       |            |                |                |
|         | Extra session    | 1 2 3 4 5 6    | 5       |            |                |                |
| Week 13 | Home/gym session | 1 2 3 4 5 6    | 7       |            |                |                |
|         | Extra session    | 1 2 3 4 5 6    | 7       |            |                |                |
| Week 14 | Home/gym session | 1 2 3 4 5 6    | 7       |            |                |                |
|         | Extra session    | 1 2 3 4 5 6    | 7       |            |                |                |
| Week 15 | Home/gym session | 1 2 3 4 5 6    | 9       |            |                |                |
|         | Extra session    | 1 2 3 4 5 6    | 9       |            |                |                |
| Week 16 | Home/gym session | 1 2 3 4 5 6    | 9       |            |                |                |
|         | Extra session    | 1 2 3 4 5 6    | 9       |            |                |                |

RPE= Rating of Perceived Exertion (0=rest, 10=working as hard as possible)

## EXERCISE 4. BALANCE/AGILITY

### FOCUS

- Get low and balanced ready for change of direction
- Knees, hips, ankles in line and hips level

#### Level 1 – Arabesques

Standing on one leg (knee slightly bent), slowly bend forward from your hip, reaching out making a straight line from your foot to your hands. Hold 5 secs.

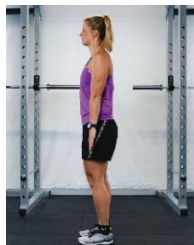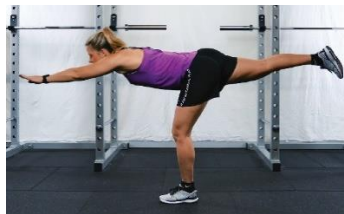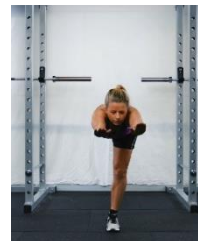

#### Level 2 – Clock Face

Standing on one leg (knee slightly bent) reach out to the imaginary numbers on a clock face (12, 3, 6, 9). Maintain balance without touching the ground. Return to upright position before reaching out again. Increase difficulty by reaching further (use a marker to guide). Begin with 3-5 repetitions in each direction.

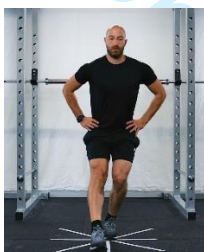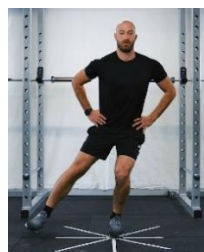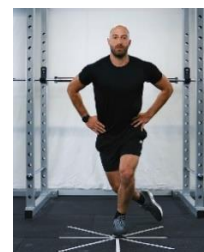

#### Level 3 – Clock face unstable surface

Repeat Level 2 exercise but this time stand on an unstable surface (e.g. wobble board, bosu ball, foam). Begin with 3-5 repetitions in each direction and progress with guidance from your physiotherapist.

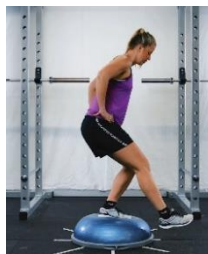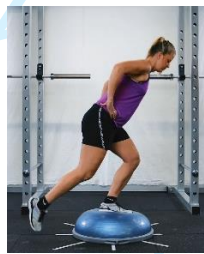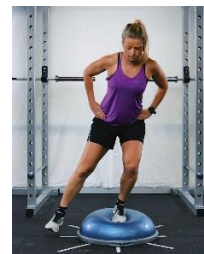

#### Level 4 – Clock face agility

Run towards the clockface, plant your foot in the centre of the clock and change direction to run along that line (start at 45°). Progress the exercise by increasing the angle - change of direction (90°, 135°, 180°). Begin with 3 repetitions in each direction and progress with guidance from your physiotherapist.

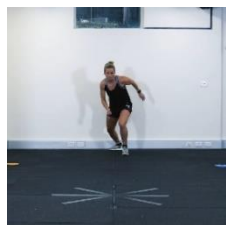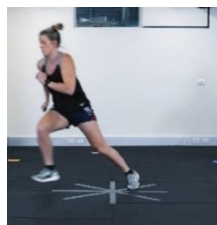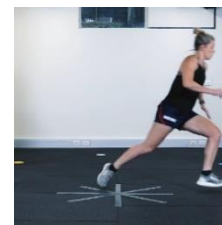

#### Level 5 – Multi-directional agility

In an area with at least 20m space, set up as detailed below in diagrams and complete 5 x each as fast as possible. Your physiotherapist will set this up. Should include forward, backward, and side running.

**Exercise 4: BALANCE/AGILITY**
**HOME/GYM RECORD**

|         |                  | Level (circle) | Aim RPE | Actual RPE | Number of sets | Number of reps |
|---------|------------------|----------------|---------|------------|----------------|----------------|
| Week 1  | Home/gym session | 1 2 3 4 5      | 5/10    |            |                |                |
|         | Extra session    | 1 2 3 4 5      | 5       |            |                |                |
| Week 2  | Home/gym session | 1 2 3 4 5      | 7       |            |                |                |
|         | Extra session    | 1 2 3 4 5      | 7       |            |                |                |
| Week 3  | Home/gym session | 1 2 3 4 5      | 9       |            |                |                |
|         | Extra session    | 1 2 3 4 5      | 9       |            |                |                |
| Week 4  | Home/gym session | 1 2 3 4 5      | 5       |            |                |                |
|         | Extra session    | 1 2 3 4 5      | 5       |            |                |                |
| Week 5  | Home/gym session | 1 2 3 4 5      | 7       |            |                |                |
|         | Extra session    | 1 2 3 4 5      | 7       |            |                |                |
| Week 6  | Home/gym session | 1 2 3 4 5      | 7       |            |                |                |
|         | Extra session    | 1 2 3 4 5      | 7       |            |                |                |
| Week 7  | Home/gym session | 1 2 3 4 5      | 9       |            |                |                |
|         | Extra session    | 1 2 3 4 5      | 9       |            |                |                |
| Week 8  | Home/gym session | 1 2 3 4 5      | 5       |            |                |                |
|         | Extra session    | 1 2 3 4 5      | 5       |            |                |                |
| Week 9  | Home/gym session | 1 2 3 4 5      | 7       |            |                |                |
|         | Extra session    | 1 2 3 4 5      | 7       |            |                |                |
| Week 10 | Home/gym session | 1 2 3 4 5      | 7       |            |                |                |
|         | Extra session    | 1 2 3 4 5      | 7       |            |                |                |
| Week 11 | Home/gym session | 1 2 3 4 5      | 9       |            |                |                |
|         | Extra session    | 1 2 3 4 5      | 9       |            |                |                |
| Week 12 | Home/gym session | 1 2 3 4 5      | 5       |            |                |                |
|         | Extra session    | 1 2 3 4 5      | 5       |            |                |                |
| Week 13 | Home/gym session | 1 2 3 4 5      | 7       |            |                |                |
|         | Extra session    | 1 2 3 4 5      | 7       |            |                |                |
| Week 14 | Home/gym session | 1 2 3 4 5      | 7       |            |                |                |
|         | Extra session    | 1 2 3 4 5      | 7       |            |                |                |
| Week 15 | Home/gym session | 1 2 3 4 5      | 9       |            |                |                |
|         | Extra session    | 1 2 3 4 5      | 9       |            |                |                |
| Week 16 | Home/gym session | 1 2 3 4 5      | 9       |            |                |                |
|         | Extra session    | 1 2 3 4 5      | 9       |            |                |                |

RPE= Rating of Perceived Exertion (0=rest, 10=working as hard as possible)

## EXERCISE 5. HAMSTRINGS

### FOCUS

- Strength in the hamstrings is vital to support overall knee control
- Complete sets of 2-3 and 8-12 repetitions (unless otherwise stated)

#### Level 1 – Double leg elevated bridge

Squeeze buttock muscles (glutes) to lift into the bridge position. Hold for 2 secs and slowly lower back to the ground.

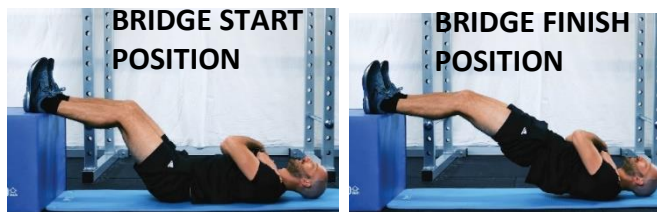

#### Level 2 – Single leg elevated bridge

Use one leg, squeeze buttocks and lift up into the bridge position. Hold for 2 secs and slowly lower back to the ground.

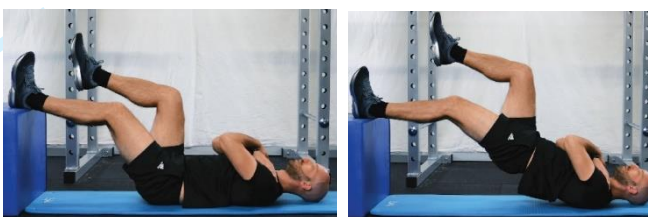

#### Level 3 – Single leg hamstring curl

Bend your knee pulling the resistance bar/band as far as you can to your hips, slowly return to the starting position. Increase difficulty by increasing weight on machine or tension in the resistance band (shorter/change band colour).

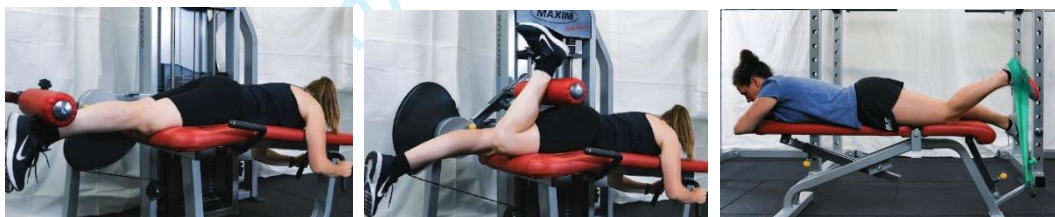

#### Level 4 – Hamstring curl swiss ball

Heels on swiss ball. Lift hips off floor. Roll swiss ball towards and away by bending knees. Progress using only one leg.

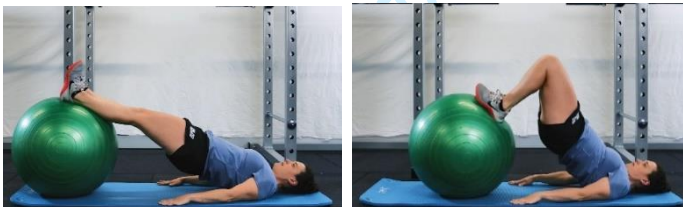

#### Level 5 – Nordic curl

Kneeling with object/partner keeping heels on ground. Keeping your back straight, lower your chest forwards until you can't hold yourself up, use your hands to break your fall. Return to starting position with your hands (not leg muscles!). Begin with 5 repetitions, 2 sets and progress with guidance from your physiotherapist.

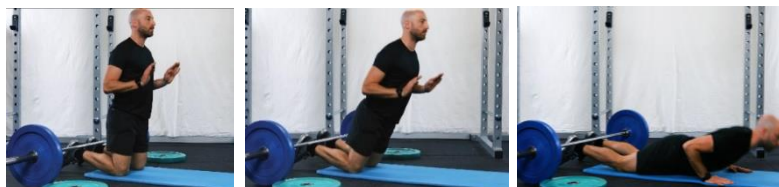

#### Level 6 – Power elevated bridge

### POWER

- Combines strength and speed
- Vital for everyday activity
- Fast movements at lower weights
- Aim for 1-3 sets of 3-6 repetitions

- Level 1, 2 or 3 exercise with aim for 1 sec to bend the knee or lift the pelvis and slowly return.
- If using hamstring curl machine set weight approx. 60-70% lighter than your last strength session.
- Start power from week 4 of program.

**Exercise 5: HAMSTRINGS**
**HOME/GYM RECORD**

|         |                  | Level (circle) | Aim RPE | Actual RPE | Kilos on affected leg | Number of sets | Number of reps |
|---------|------------------|----------------|---------|------------|-----------------------|----------------|----------------|
| Week 1  | Home/gym session | 1 2 3 4 5 6    | 5/10    |            |                       |                |                |
|         | Extra session    | 1 2 3 4 5 6    | 5       |            |                       |                |                |
| Week 2  | Home/gym session | 1 2 3 4 5 6    | 7       |            |                       |                |                |
|         | Extra session    | 1 2 3 4 5 6    | 7       |            |                       |                |                |
| Week 3  | Home/gym session | 1 2 3 4 5 6    | 9       |            |                       |                |                |
|         | Extra session    | 1 2 3 4 5 6    | 9       |            |                       |                |                |
| Week 4  | Home/gym session | 1 2 3 4 5 6    | 5       |            |                       |                |                |
|         | Extra session    | 1 2 3 4 5 6    | 5       |            |                       |                |                |
| Week 5  | Home/gym session | 1 2 3 4 5 6    | 7       |            |                       |                |                |
|         | Extra session    | 1 2 3 4 5 6    | 7       |            |                       |                |                |
| Week 6  | Home/gym session | 1 2 3 4 5 6    | 7       |            |                       |                |                |
|         | Extra session    | 1 2 3 4 5 6    | 7       |            |                       |                |                |
| Week 7  | Home/gym session | 1 2 3 4 5 6    | 9       |            |                       |                |                |
|         | Extra session    | 1 2 3 4 5 6    | 9       |            |                       |                |                |
| Week 8  | Home/gym session | 1 2 3 4 5 6    | 5       |            |                       |                |                |
|         | Extra session    | 1 2 3 4 5 6    | 5       |            |                       |                |                |
| Week 9  | Home/gym session | 1 2 3 4 5 6    | 7       |            |                       |                |                |
|         | Extra session    | 1 2 3 4 5 6    | 7       |            |                       |                |                |
| Week 10 | Home/gym session | 1 2 3 4 5 6    | 7       |            |                       |                |                |
|         | Extra session    | 1 2 3 4 5 6    | 7       |            |                       |                |                |
| Week 11 | Home/gym session | 1 2 3 4 5 6    | 9       |            |                       |                |                |
|         | Extra session    | 1 2 3 4 5 6    | 9       |            |                       |                |                |
| Week 12 | Home/gym session | 1 2 3 4 5 6    | 5       |            |                       |                |                |
|         | Extra session    | 1 2 3 4 5 6    | 5       |            |                       |                |                |
| Week 13 | Home/gym session | 1 2 3 4 5 6    | 7       |            |                       |                |                |
|         | Extra session    | 1 2 3 4 5 6    | 7       |            |                       |                |                |
| Week 14 | Home/gym session | 1 2 3 4 5 6    | 7       |            |                       |                |                |
|         | Extra session    | 1 2 3 4 5 6    | 7       |            |                       |                |                |
| Week 15 | Home/gym session | 1 2 3 4 5 6    | 9       |            |                       |                |                |
|         | Extra session    | 1 2 3 4 5 6    | 9       |            |                       |                |                |
| Week 16 | Home/gym session | 1 2 3 4 5 6    | 9       |            |                       |                |                |
|         | Extra session    | 1 2 3 4 5 6    | 9       |            |                       |                |                |

RPE= Rating of Perceived Exertion (0=rest, 10=working as hard as possible)

1  
2  
3  
4  
5  
6  
7  
8  
9  
10  
11  
12  
13  
14  
15  
16  
17  
18  
19  
20  
21  
22  
23  
24  
25  
26  
27  
28  
29  
30  
31  
32  
33  
34  
35  
36  
37  
38  
39  
40  
41  
42  
43  
44  
45  
46  
47  
48  
49  
50  
51  
52  
53  
54  
55  
56  
57  
58  
59  
60

For peer review only

*This page has been intentionally left blank.*



1  
2  
3  
4  
5  
6  
7  
8  
9  
10  
11  
12  
13  
14  
15  
16  
17  
18  
19  
20  
21  
22  
23  
24  
25  
26  
27  
28  
29  
30  
31  
32  
33  
34  
35  
36  
37  
38  
39  
40  
41  
42  
43  
44  
45  
46  
47  
48  
49  
50  
51  
52  
53  
54  
55  
56  
57  
58  
59  
60

# ADDITIONAL EXERCISES

For peer review only

## EXERCISE 6. TRUNK/CORE STRENGTH

## Level 1 – Front plank

Plank position, contract core muscles maintaining a straight line from ankle to head (30-60 secs)

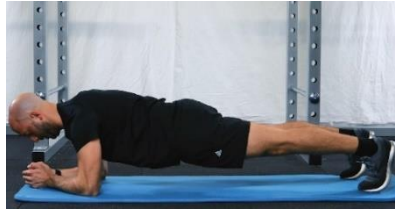

## Level 2 – Front plank lift

Plank position, lift one leg, holding for 2 secs, and alternate between legs for 30-60 secs.

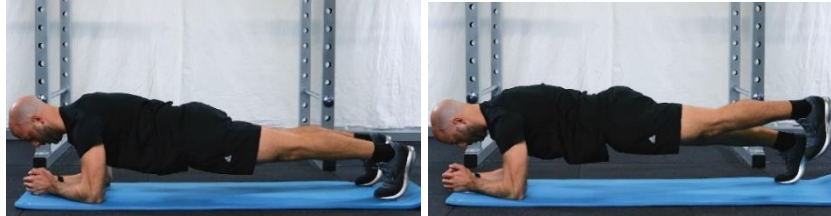
 Level 3 – Front plank lift  
(resistance band)

Place resistance band around ankles. Move into plank position. Lift one leg stretching resistance band, holding for 2 secs, and alternate between legs for 30-60 secs.

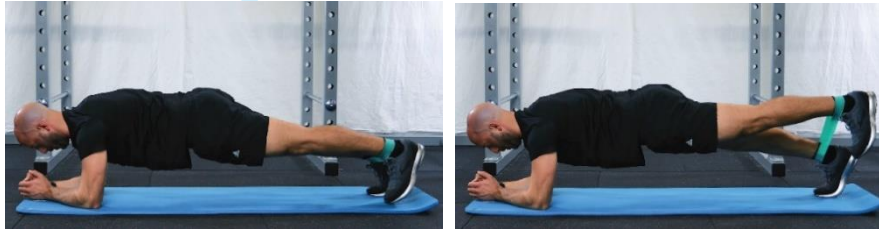

## Level 4 – Side plank

Side plank position, keeping body in a straight line. Hold for 30 secs.

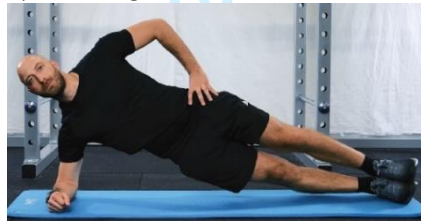

## Level 5 – Side plank lift

Side plank position, lift your top leg. Hold for 2 secs, then slowly return. Repeat for 30-60 secs.

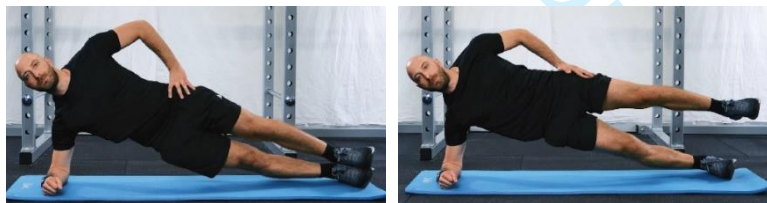
 Level 6 – Side plank lift  
(resistance band)

Side plank position. Resistance band around ankles. Lift the top leg up stretching the resistance band and lower. Repeat for 30-60 secs.

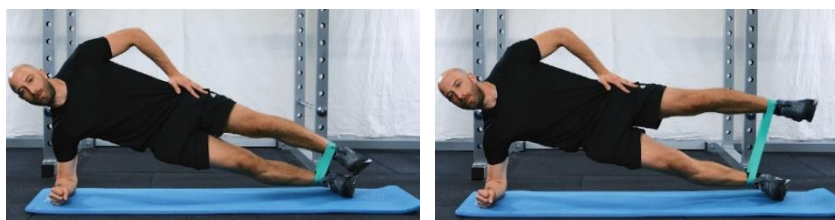

**Exercise 6: TRUNK/CORE STRENGTH**
**HOME/GYM RECORD**

|         |                  | Level (circle) | Aim RPE | Actual RPE | Kilos | Number of sets | Number of reps |
|---------|------------------|----------------|---------|------------|-------|----------------|----------------|
| Week 1  | Home/gym session | 1 2 3 4 5 6    | 5/10    |            |       |                |                |
|         | Extra session    | 1 2 3 4 5 6    | 5       |            |       |                |                |
| Week 2  | Home/gym session | 1 2 3 4 5 6    | 7       |            |       |                |                |
|         | Extra session    | 1 2 3 4 5 6    | 7       |            |       |                |                |
| Week 3  | Home/gym session | 1 2 3 4 5 6    | 9       |            |       |                |                |
|         | Extra session    | 1 2 3 4 5 6    | 9       |            |       |                |                |
| Week 4  | Home/gym session | 1 2 3 4 5 6    | 5       |            |       |                |                |
|         | Extra session    | 1 2 3 4 5 6    | 5       |            |       |                |                |
| Week 5  | Home/gym session | 1 2 3 4 5 6    | 7       |            |       |                |                |
|         | Extra session    | 1 2 3 4 5 6    | 7       |            |       |                |                |
| Week 6  | Home/gym session | 1 2 3 4 5 6    | 7       |            |       |                |                |
|         | Extra session    | 1 2 3 4 5 6    | 7       |            |       |                |                |
| Week 7  | Home/gym session | 1 2 3 4 5 6    | 9       |            |       |                |                |
|         | Extra session    | 1 2 3 4 5 6    | 9       |            |       |                |                |
| Week 8  | Home/gym session | 1 2 3 4 5 6    | 5       |            |       |                |                |
|         | Extra session    | 1 2 3 4 5 6    | 5       |            |       |                |                |
| Week 9  | Home/gym session | 1 2 3 4 5 6    | 7       |            |       |                |                |
|         | Extra session    | 1 2 3 4 5 6    | 7       |            |       |                |                |
| Week 10 | Home/gym session | 1 2 3 4 5 6    | 7       |            |       |                |                |
|         | Extra session    | 1 2 3 4 5 6    | 7       |            |       |                |                |
| Week 11 | Home/gym session | 1 2 3 4 5 6    | 9       |            |       |                |                |
|         | Extra session    | 1 2 3 4 5 6    | 9       |            |       |                |                |
| Week 12 | Home/gym session | 1 2 3 4 5 6    | 5       |            |       |                |                |
|         | Extra session    | 1 2 3 4 5 6    | 5       |            |       |                |                |
| Week 13 | Home/gym session | 1 2 3 4 5 6    | 7       |            |       |                |                |
|         | Extra session    | 1 2 3 4 5 6    | 7       |            |       |                |                |
| Week 14 | Home/gym session | 1 2 3 4 5 6    | 7       |            |       |                |                |
|         | Extra session    | 1 2 3 4 5 6    | 7       |            |       |                |                |
| Week 15 | Home/gym session | 1 2 3 4 5 6    | 9       |            |       |                |                |
|         | Extra session    | 1 2 3 4 5 6    | 9       |            |       |                |                |
| Week 16 | Home/gym session | 1 2 3 4 5 6    | 9       |            |       |                |                |
|         | Extra session    | 1 2 3 4 5 6    | 9       |            |       |                |                |

RPE= Rating of Perceived Exertion (0=rest, 10=working as hard as possible)

# EXERCISE 7. HIP ABDUCTION (OUTER THIGH)

Level 1 – Standing hip abduction with resistance band

Move your leg straight out to the side, tightening the resistance band. Slowly return to starting position. Increase difficulty by increasing resistance band strength with a different colour (your physiotherapist can help you with this). Aim 2-3 sets of 8-12.

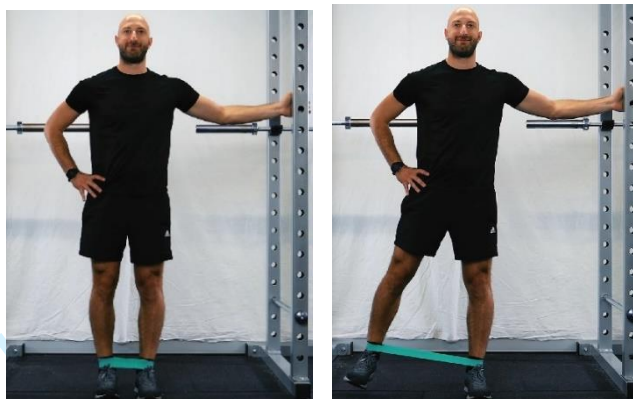

Level 2 – Standing hip abduction with cable

Move your leg straight out to the side against cable resistance, slowly return to starting position. Aim 2-3 sets of 8-12.

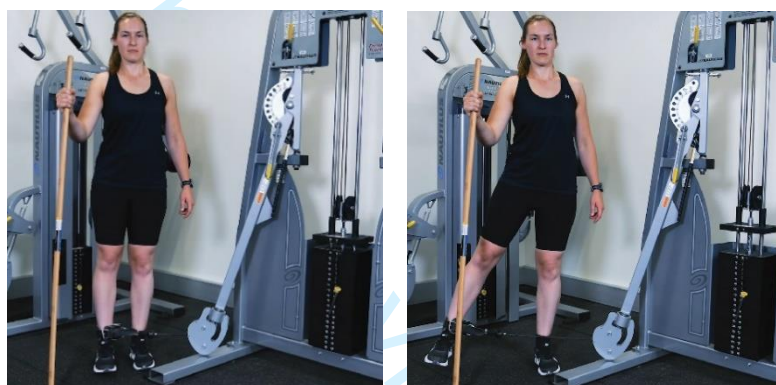

Level 3 – Crab walk

In squat position (hip/knee slightly flexed) walk sideways (20 steps each way) keeping your upper body straight and tension in the resistance band. Increase difficulty by moving band to forefoot or increasing resistance.

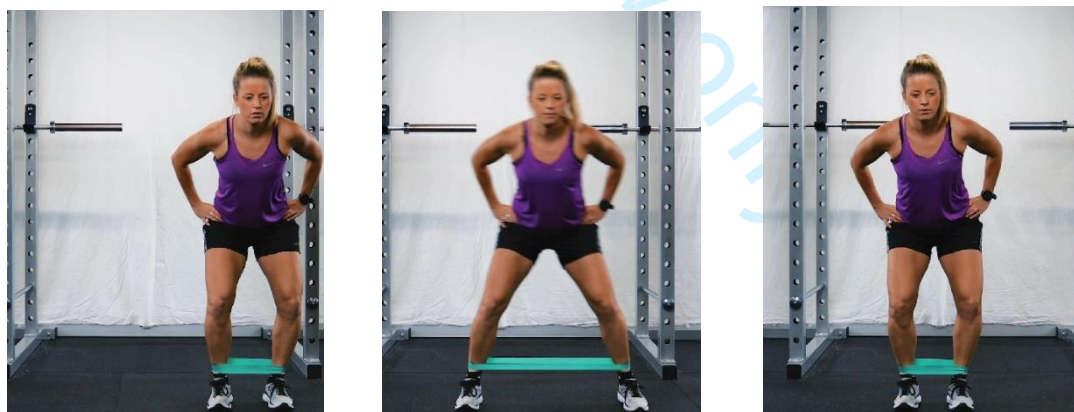

**Exercise 7: HIP ABDUCTION (OUTER THIGH)**
**HOME/GYM RECORD**

|         |                  | Level (circle) | Aim RPE | Actual RPE | Kilos on affected leg | Number of sets | Number of reps |
|---------|------------------|----------------|---------|------------|-----------------------|----------------|----------------|
| Week 1  | Home/gym session | 1 2 3          | 5/10    |            |                       |                |                |
|         | Extra session    | 1 2 3          | 5       |            |                       |                |                |
| Week 2  | Home/gym session | 1 2 3          | 7       |            |                       |                |                |
|         | Extra session    | 1 2 3          | 7       |            |                       |                |                |
| Week 3  | Home/gym session | 1 2 3          | 9       |            |                       |                |                |
|         | Extra session    | 1 2 3          | 9       |            |                       |                |                |
| Week 4  | Home/gym session | 1 2 3          | 5       |            |                       |                |                |
|         | Extra session    | 1 2 3          | 5       |            |                       |                |                |
| Week 5  | Home/gym session | 1 2 3          | 7       |            |                       |                |                |
|         | Extra session    | 1 2 3          | 7       |            |                       |                |                |
| Week 6  | Home/gym session | 1 2 3          | 7       |            |                       |                |                |
|         | Extra session    | 1 2 3          | 7       |            |                       |                |                |
| Week 7  | Home/gym session | 1 2 3          | 9       |            |                       |                |                |
|         | Extra session    | 1 2 3          | 9       |            |                       |                |                |
| Week 8  | Home/gym session | 1 2 3          | 5       |            |                       |                |                |
|         | Extra session    | 1 2 3          | 5       |            |                       |                |                |
| Week 9  | Home/gym session | 1 2 3          | 7       |            |                       |                |                |
|         | Extra session    | 1 2 3          | 7       |            |                       |                |                |
| Week 10 | Home/gym session | 1 2 3          | 7       |            |                       |                |                |
|         | Extra session    | 1 2 3          | 7       |            |                       |                |                |
| Week 11 | Home/gym session | 1 2 3          | 9       |            |                       |                |                |
|         | Extra session    | 1 2 3          | 9       |            |                       |                |                |
| Week 12 | Home/gym session | 1 2 3          | 5       |            |                       |                |                |
|         | Extra session    | 1 2 3          | 5       |            |                       |                |                |
| Week 13 | Home/gym session | 1 2 3          | 7       |            |                       |                |                |
|         | Extra session    | 1 2 3          | 7       |            |                       |                |                |
| Week 14 | Home/gym session | 1 2 3          | 7       |            |                       |                |                |
|         | Extra session    | 1 2 3          | 7       |            |                       |                |                |
| Week 15 | Home/gym session | 1 2 3          | 9       |            |                       |                |                |
|         | Extra session    | 1 2 3          | 9       |            |                       |                |                |
| Week 16 | Home/gym session | 1 2 3          | 9       |            |                       |                |                |
|         | Extra session    | 1 2 3          | 9       |            |                       |                |                |

RPE= Rating of Perceived Exertion (0=rest, 10=working as hard as possible)

# EXERCISE 8. HIP ADDUCTION (INNER THIGH)

Level 1 – Hip adduction with resistance band

Standing maintaining good alignment, move your leg toward your body, tightening resistance band and slowly return to the starting position. Aim 2-3 sets of 8-12.

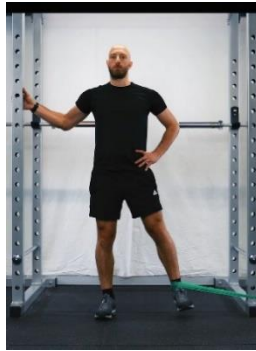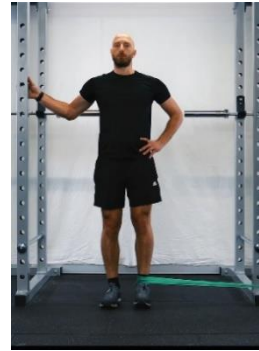

Level 2 – Hip adduction with cable

Standing maintaining good alignment, move your leg toward your body and slowly return to the starting position. Aim 2-3 sets of 8-12.

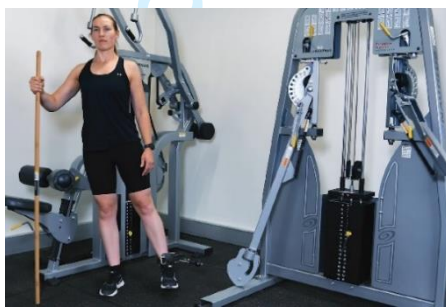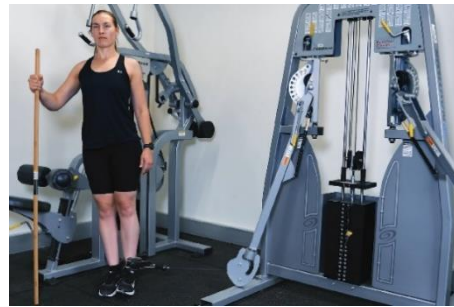

Level 3 – Groin plank - knee

Side plank position with upper leg (knee) on chair, slowly lift and lower your bottom leg to the under surface of the chair. Aim 1-3 sets of 8-12.

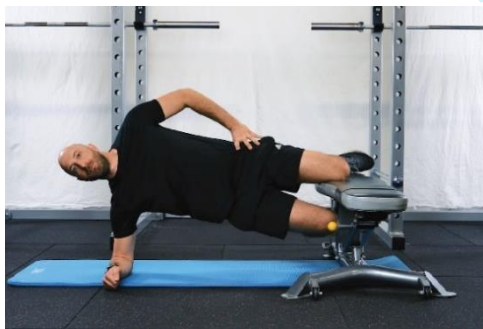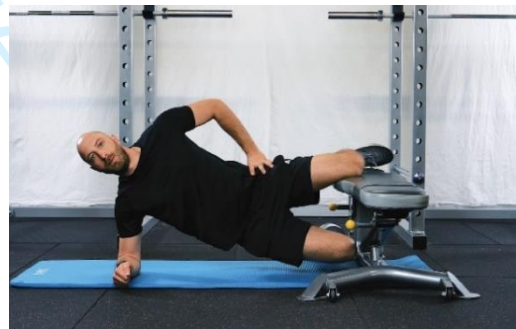

Level 4 – Groin plank ankle

Side plank position with upper leg (foot) on chair, slowly lift and lower your bottom leg to the under surface of the chair. Aim 1-3 sets of 8-12.

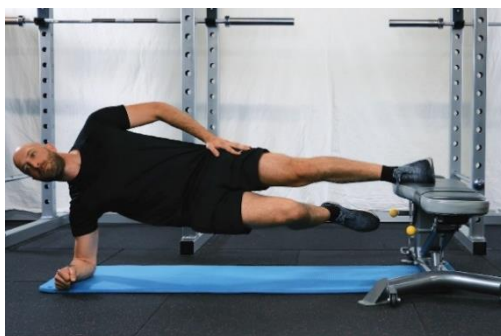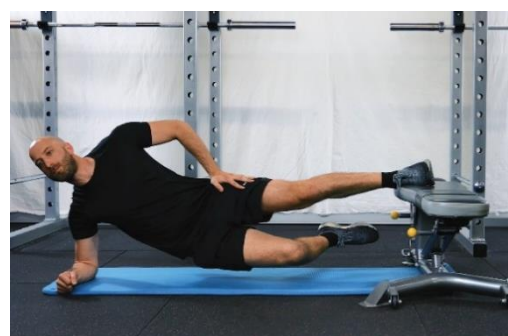

**Exercise 8: HIP ADDUCTION (INNER THIGH)**
**HOME/GYM RECORD**

|         |                  | Level (circle) | Aim RPE | Actual RPE | Kilos on affected leg | Number of sets | Number of reps |
|---------|------------------|----------------|---------|------------|-----------------------|----------------|----------------|
| Week 1  | Home/gym session | 1 2 3 4        | 5/10    |            |                       |                |                |
|         | Extra session    | 1 2 3 4        | 5       |            |                       |                |                |
| Week 2  | Home/gym session | 1 2 3 4        | 7       |            |                       |                |                |
|         | Extra session    | 1 2 3 4        | 7       |            |                       |                |                |
| Week 3  | Home/gym session | 1 2 3 4        | 9       |            |                       |                |                |
|         | Extra session    | 1 2 3 4        | 9       |            |                       |                |                |
| Week 4  | Home/gym session | 1 2 3 4        | 5       |            |                       |                |                |
|         | Extra session    | 1 2 3 4        | 5       |            |                       |                |                |
| Week 5  | Home/gym session | 1 2 3 4        | 7       |            |                       |                |                |
|         | Extra session    | 1 2 3 4        | 7       |            |                       |                |                |
| Week 6  | Home/gym session | 1 2 3 4        | 7       |            |                       |                |                |
|         | Extra session    | 1 2 3 4        | 7       |            |                       |                |                |
| Week 7  | Home/gym session | 1 2 3 4        | 9       |            |                       |                |                |
|         | Extra session    | 1 2 3 4        | 9       |            |                       |                |                |
| Week 8  | Home/gym session | 1 2 3 4        | 5       |            |                       |                |                |
|         | Extra session    | 1 2 3 4        | 5       |            |                       |                |                |
| Week 9  | Home/gym session | 1 2 3 4        | 7       |            |                       |                |                |
|         | Extra session    | 1 2 3 4        | 7       |            |                       |                |                |
| Week 10 | Home/gym session | 1 2 3 4        | 7       |            |                       |                |                |
|         | Extra session    | 1 2 3 4        | 7       |            |                       |                |                |
| Week 11 | Home/gym session | 1 2 3 4        | 9       |            |                       |                |                |
|         | Extra session    | 1 2 3 4        | 9       |            |                       |                |                |
| Week 12 | Home/gym session | 1 2 3 4        | 5       |            |                       |                |                |
|         | Extra session    | 1 2 3 4        | 5       |            |                       |                |                |
| Week 13 | Home/gym session | 1 2 3 4        | 7       |            |                       |                |                |
|         | Extra session    | 1 2 3 4        | 7       |            |                       |                |                |
| Week 14 | Home/gym session | 1 2 3 4        | 7       |            |                       |                |                |
|         | Extra session    | 1 2 3 4        | 7       |            |                       |                |                |
| Week 15 | Home/gym session | 1 2 3 4        | 9       |            |                       |                |                |
|         | Extra session    | 1 2 3 4        | 9       |            |                       |                |                |
| Week 16 | Home/gym session | 1 2 3 4        | 9       |            |                       |                |                |
|         | Extra session    | 1 2 3 4        | 9       |            |                       |                |                |

RPE= Rating of Perceived Exertion (0=rest, 10=working as hard as possible)

## EXERCISE 9. CALF

On two legs standing on the edge of a step, raise up onto your toes and then lower both heels back down below the step. Only light support with hands to maintain balance. Aim 2-3 sets of 8-12.

Level 1 – Double leg calf raises

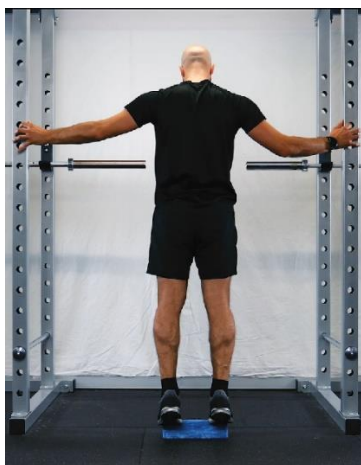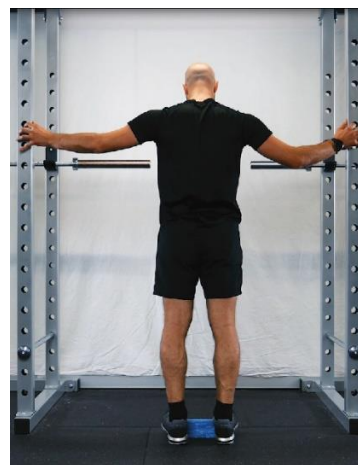

On one leg standing on the edge of a step, raise up onto your toe and then lower heel back down below the step. Only light support with hands to maintain balance. Aim 2-3 sets of 8-12.

Level 2 – Single leg calf raises

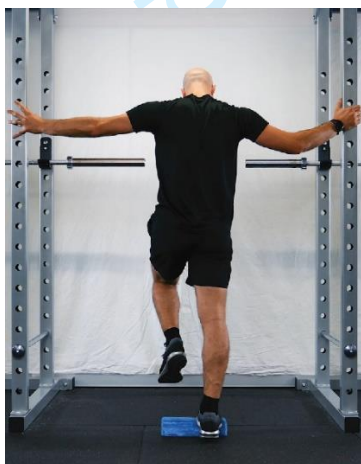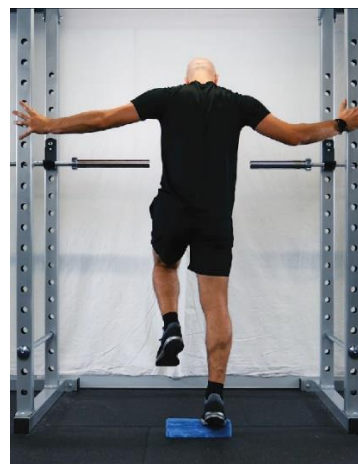

Same exercise as Level 2 but add a weight in your opposite hand to make the exercise harder. Aim 2-3 sets of 8-12.

Level 3 – Weighted single leg calf raises

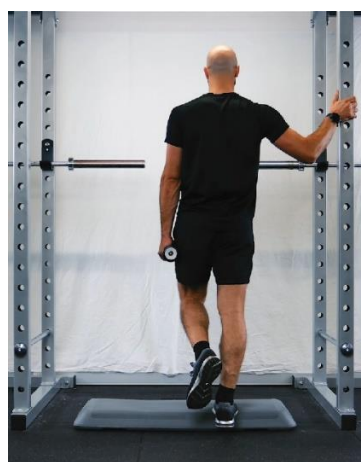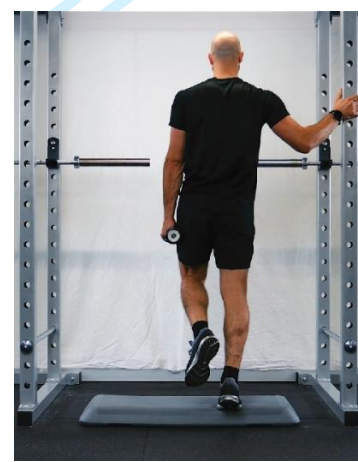



**Exercise 9: CALF**
**HOME/GYM RECORD**

|         |                  | Level (circle) | Aim RPE | Actual RPE | Kilos | Number of sets | Number of reps |
|---------|------------------|----------------|---------|------------|-------|----------------|----------------|
| Week 1  | Home/gym session | 1 2 3          | 5/10    |            |       |                |                |
|         | Extra session    | 1 2 3          | 5       |            |       |                |                |
| Week 2  | Home/gym session | 1 2 3          | 7       |            |       |                |                |
|         | Extra session    | 1 2 3          | 7       |            |       |                |                |
| Week 3  | Home/gym session | 1 2 3          | 9       |            |       |                |                |
|         | Extra session    | 1 2 3          | 9       |            |       |                |                |
| Week 4  | Home/gym session | 1 2 3          | 5       |            |       |                |                |
|         | Extra session    | 1 2 3          | 5       |            |       |                |                |
| Week 5  | Home/gym session | 1 2 3          | 7       |            |       |                |                |
|         | Extra session    | 1 2 3          | 7       |            |       |                |                |
| Week 6  | Home/gym session | 1 2 3          | 7       |            |       |                |                |
|         | Extra session    | 1 2 3          | 7       |            |       |                |                |
| Week 7  | Home/gym session | 1 2 3          | 9       |            |       |                |                |
|         | Extra session    | 1 2 3          | 9       |            |       |                |                |
| Week 8  | Home/gym session | 1 2 3          | 5       |            |       |                |                |
|         | Extra session    | 1 2 3          | 5       |            |       |                |                |
| Week 9  | Home/gym session | 1 2 3          | 7       |            |       |                |                |
|         | Extra session    | 1 2 3          | 7       |            |       |                |                |
| Week 10 | Home/gym session | 1 2 3          | 7       |            |       |                |                |
|         | Extra session    | 1 2 3          | 7       |            |       |                |                |
| Week 11 | Home/gym session | 1 2 3          | 9       |            |       |                |                |
|         | Extra session    | 1 2 3          | 9       |            |       |                |                |
| Week 12 | Home/gym session | 1 2 3          | 5       |            |       |                |                |
|         | Extra session    | 1 2 3          | 5       |            |       |                |                |
| Week 13 | Home/gym session | 1 2 3          | 7       |            |       |                |                |
|         | Extra session    | 1 2 3          | 7       |            |       |                |                |
| Week 14 | Home/gym session | 1 2 3          | 7       |            |       |                |                |
|         | Extra session    | 1 2 3          | 7       |            |       |                |                |
| Week 15 | Home/gym session | 1 2 3          | 9       |            |       |                |                |
|         | Extra session    | 1 2 3          | 9       |            |       |                |                |
| Week 16 | Home/gym session | 1 2 3          | 9       |            |       |                |                |
|         | Extra session    | 1 2 3          | 9       |            |       |                |                |

RPE= Rating of Perceived Exertion (0=rest, 10=working as hard as possible)

1  
2  
3  
4  
5  
6  
7  
8  
9  
10  
11  
12  
13  
14  
15  
16  
17  
18  
19  
20  
21  
22  
23  
24  
25  
26  
27  
28  
29  
30  
31  
32  
33  
34  
35  
36  
37  
38  
39  
40  
41  
42  
43  
44  
45  
46  
47  
48  
49  
50  
51  
52  
53  
54  
55  
56  
57  
58  
59  
60

# SUPER nee

# Participant Handbook

## 8. WHAT CAN I DO TO STRENGTHEN MY QUADRICEPS?

Start with a moderately difficult exercise and progress according to the guidelines set out in the handbook (see section 8 “How hard should I exercise?”).

### Progress quadricep muscles exercises by:

1. Use one leg instead of two
2. Add a weight or increase the weight
3. Increase the depth of exercise
4. Increase the speed of the exercise
5. Increase number of repetitions

### Home or gym exercises

#### Option 1 – Double leg squats

With even weight on both legs, bend your knees evenly and squat down to a chair height. Make sure your knees don't move in or out and keep your trunk upright. Return to upright standing. If this is too hard, just squat down as far as you can.

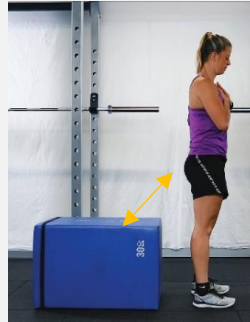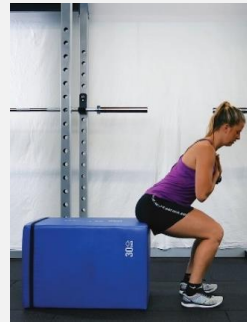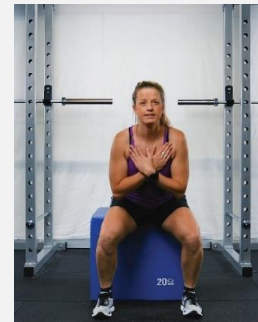

#### Option 2 – Bulgarian split squat

Put your back leg up on a stable elevated object and so that your front knee is at 90°. Try and keep most of your weight on your front leg. Keep your knees over your toes and don't let your hips drop.

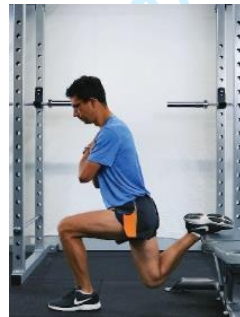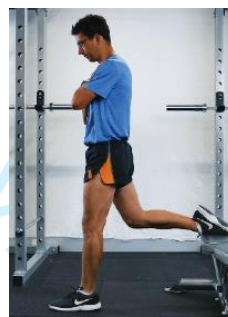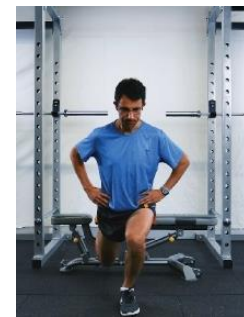

### Gym exercises

#### Option 3 – Knee extension machine

In the seated knee extension machine, straighten your knee against resistance. Start at 90° knee bend and straighten to full knee extension.

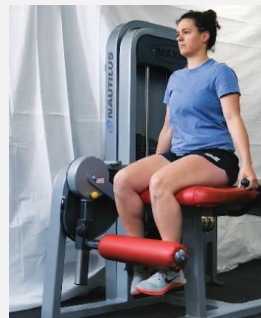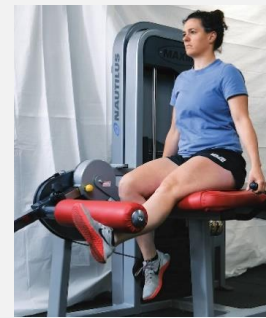

#### Option 4 – Leg press

Using the leg press machine, press against the resistance while keeping your knees in good alignment (knees over toes). Don't fully lock your knees out. Start with a leg press set at 45° knee bend.

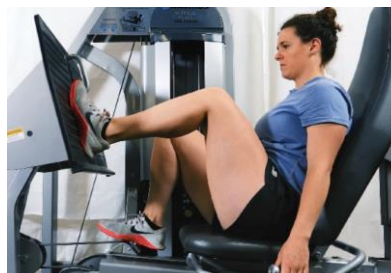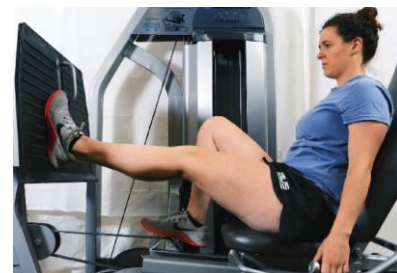

## 9. WHAT CAN I DO TO STRENGTHEN MY HAMSTRINGS?

Start with a moderately difficult exercise and progress according to the guidelines set out in the handbook (see section 8 “How hard should I exercise?”).

**Progress hamstring muscle exercises by:**

1. Add a weight or increase the weight
2. Increase number of repetitions

### Home or gym exercises

#### Option 1 – Elevated bridge

Lying on your back with both legs elevated on a stable object use your hamstrings to lift your hips off the ground so that your back and legs are in a straight line. Use your hands for stability as needed.

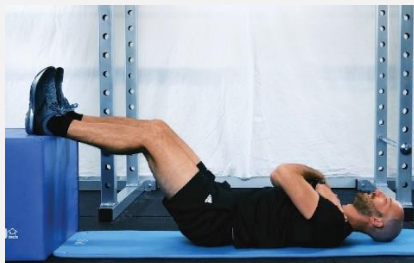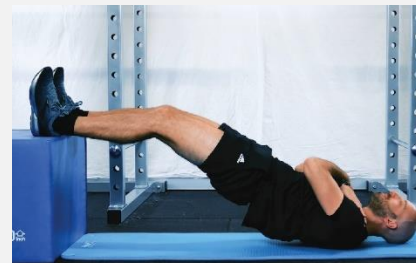

To progress this exercise:

- Straighten your knee more
- Increase box/bench height

#### Option 2 – Single leg elevated bridge

Lying on your back with one leg elevated and slightly bent, on a stable object use your hamstrings to lift your hips off the ground so that your back and legs are in a straight line. Use your hands for stability as needed.

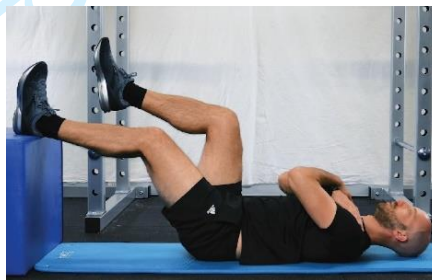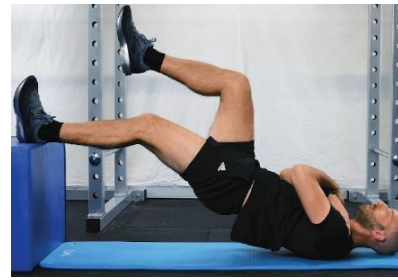

### Gym exercises

#### Option 3– Deadlifts

With straight legs or a very slight knee bend, bend from your hips as far as comfortable (aim for the weight to be below your knees), then use your hamstring muscles to pull yourself back up to standing. Make sure you don't bend from your spine, but instead keep it straight.

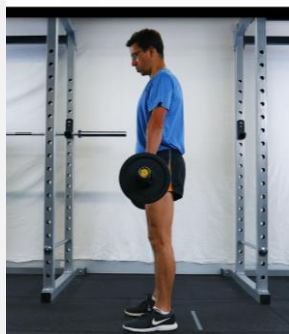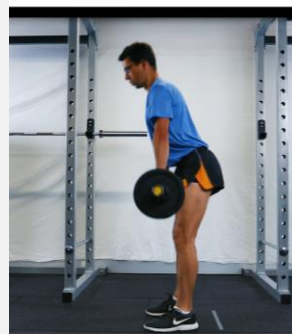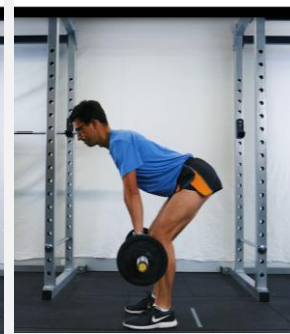

#### Option 4 – Hamstring curl machine

In the gym, use the hamstring curl machine to work against the resistance to bring your heel to your hips. Start with your legs close to fully straight and bend to about 90°. Make sure you feel your hamstring muscle work.

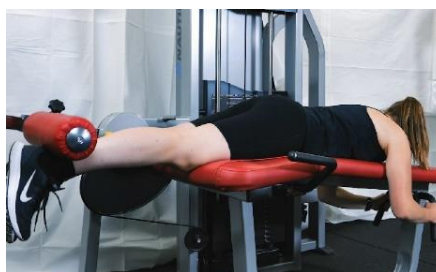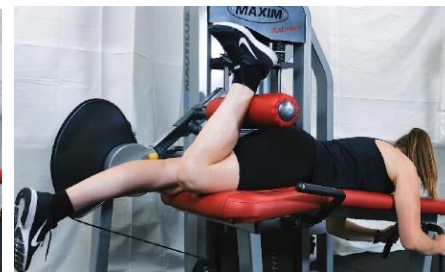

## 10. WHAT CAN I DO TO IMPROVE MY PLYOMETRIC POWER?

Start with a moderately difficult exercise and progress according to the guidelines set out in the handbook (see section 8 “How hard should I exercise?”).

**PLYOMETRIC POWER** – Your ability to jump and land with both control and speed.

**Progress jumping exercises by:**

1. Increase the speed of jumping
2. Increase the number of jumps

### Home or gym exercises

#### Option 1 – Double leg forward jump

Jump as high as possible landing softly bending at the hips and knees. Progress to jumping forwards as far as possible.

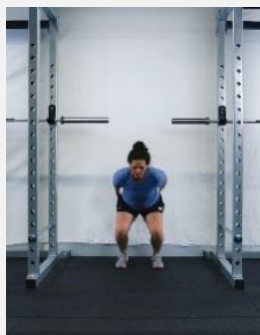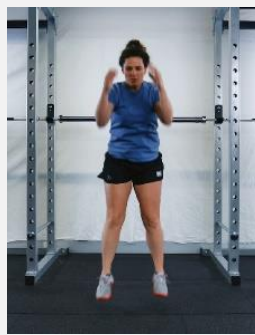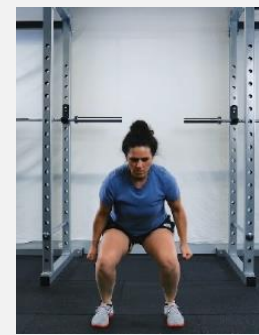

#### Option 2 – Single leg forward hop

Hop forward on one leg landing softly bending at your hips and knees. Keep good alignment. Increase distance/speed.

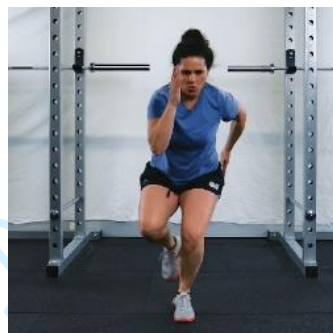

#### Option 3 – Single leg side hop

Hop side-to-side on one leg landing softly on the same leg bending at your hips and knees. Increase lateral distance.

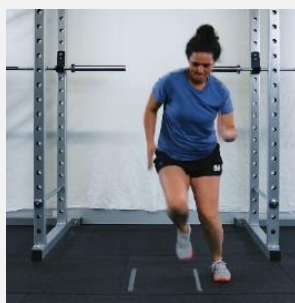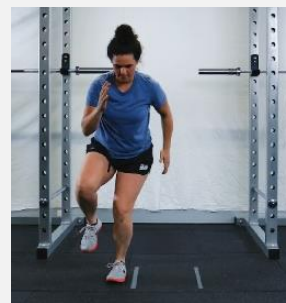

#### Option 4 – Double leg drop jump (off a step/box)

Standing on a box/step, jump down landing softly on both feet and immediately jump up as high as you can. Increase height of box or hold weights to make harder.

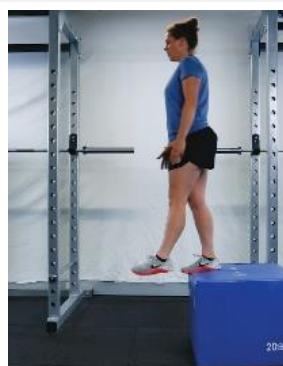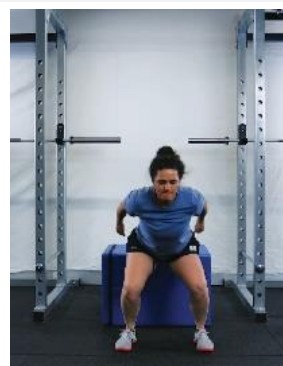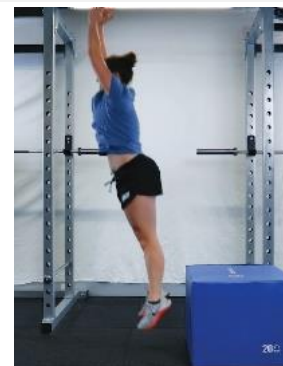

The size of the box can range from small (20cm) step to large (40-50cm as pictured). You can also progress to landing on one leg only.

## 11. WHAT CAN I DO TO STRENGTHEN MY TRUNK/CORE?

Start with a moderately difficult exercise and progress according to the guidelines set out in the handbook (see section 8 “How hard should I exercise?”).

**Progress core exercises by:**

1. Increase number of repetitions
2. Increase length of time held in position

### Home or gym exercises

#### Option 1 – Front plank

Begin on your feet and elbows and maintain a straight line from your head to your ankle, so that you do not arch your back. Hold with good control without your hips moving higher or lower.

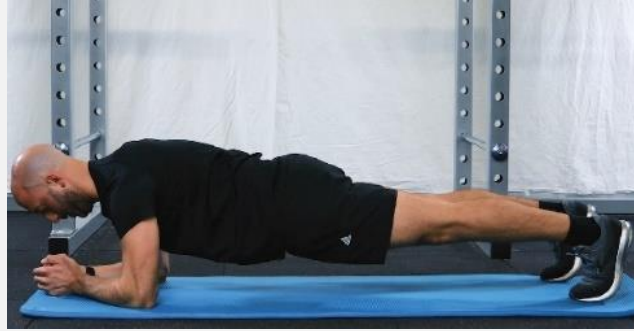

Aim to start with:

- 30 secs hold x 3 times

#### Option 2 – Front plank with leg lift

Plank position, lift one leg, holding for 2 secs, and alternate between legs for 30-60 secs.

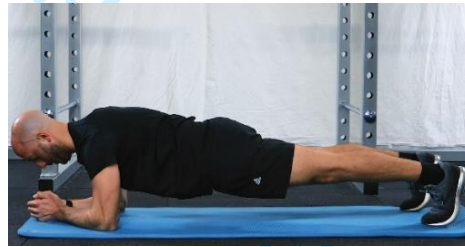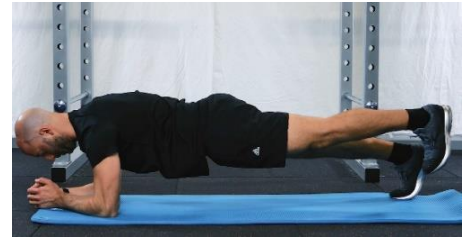

Aim to start with:

- 10 reps each leg x 3 sets

#### Option 3 – Side planks

Start on your elbow and side of your feet and maintain a straight line from your shoulders to your ankles. Hold the position with good control without holding your hips too high or low.

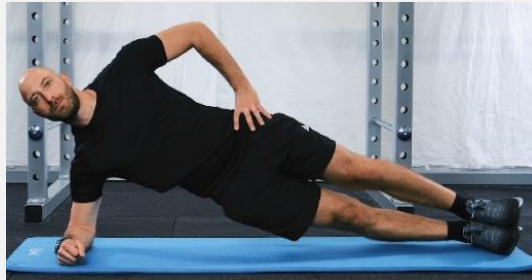

Aim to start with:

- 30 secs hold x 3 times

#### Option 4 – Side plank with leg lift

Side plank position, leading with your heel, lift your top leg. Hold for 2 secs, then slowly return to starting position.

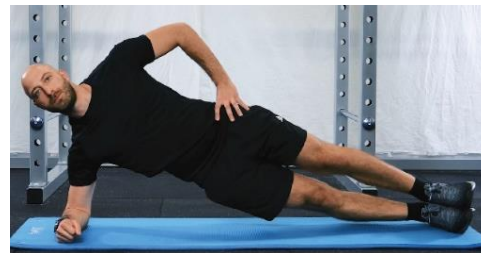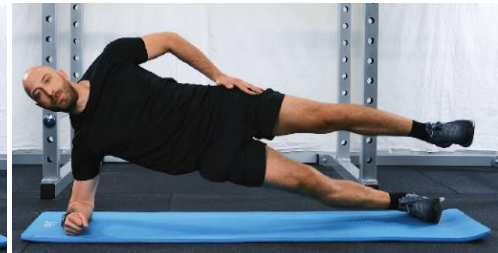

Aim to start with:

- 10 reps each leg x 3 sets

## 12. WHAT CAN I DO TO STRENGTHEN MY HIP?

Start with a moderately difficult exercise and progress according to the guidelines set out in the handbook (see section 8 “How hard should I exercise?”).

**Progress hip muscle exercises by:**

1. Add a weight or increase the weight
2. Increase the height or width of exercise
3. Increase the speed of the exercise
4. Increase number of repetitions

### Home or gym exercises

#### Option 1 – Standing hip

##### abduction with resistance band

Move your leg straight out to the side tightening resistance band. Slowly return to starting position. Increase difficulty by increasing resistance band strength.

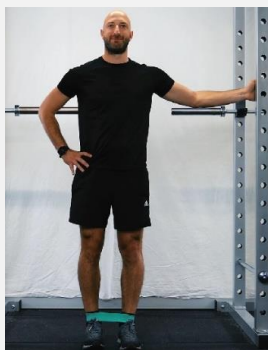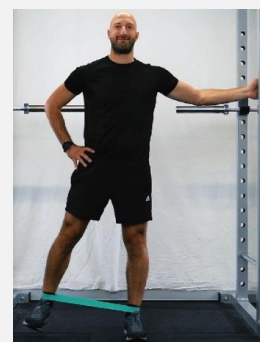

#### Option 2 – Crab walk

In squat position (hip/knee slightly flexed) walk sideways (20 steps each way) keeping your upper body straight and tension in the resistance band. Increase difficulty by moving band to foot.

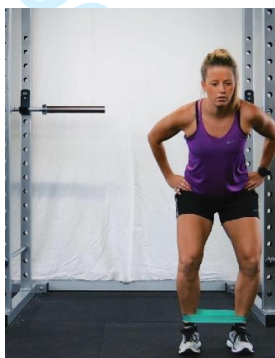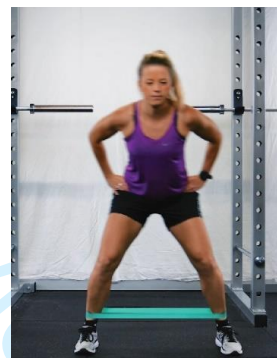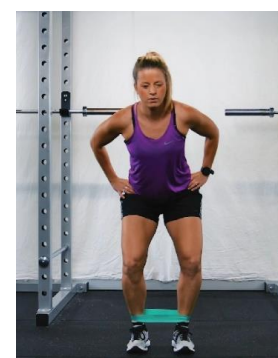

#### Option 3 – Resistance band hip

##### adduction

Standing maintaining good alignment, move your leg toward your body, tightening resistance band, and slowly return to the starting position.

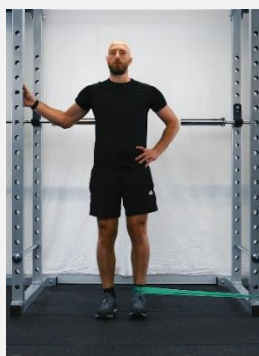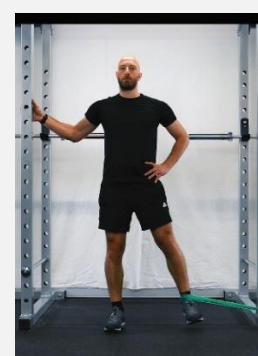

#### Option 4 – Groin/adductor

##### plank

Side plank position with upper leg (knee) on chair, slowly lift and lower your bottom leg to the under surface of the chair.

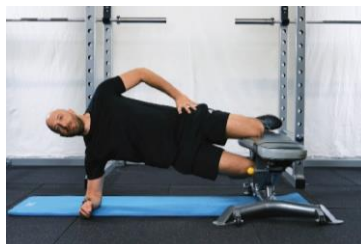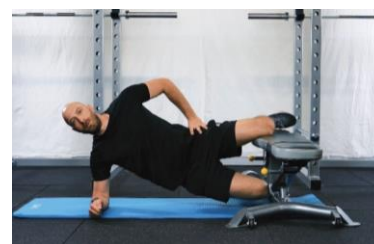

## 13. WHAT CAN I DO TO STRENGTHEN MY CALVES?

Start with a moderately difficult exercise and progress according to the guidelines set out in the handbook (see section 8 “How hard should I exercise?”).

**Progress calf muscle exercises by:**

- |                                        |                                       |
|----------------------------------------|---------------------------------------|
| 1. Increase the speed of the exercise  | 5. Increase the depth of exercise     |
| 2. Increase number of repetitions      | 6. Increase the speed of the exercise |
| 3. Use one leg instead of two          | 7. Increase number of repetitions     |
| 4. Add a weight or increase the weight |                                       |

### Home or gym exercises

#### Option 1 - Calf raise (double leg and single leg)

Standing off a small step/object about 5-10 cm high on two legs, raise your heels off the ground, and lower back down to the ground.

Make sure you do not rotate your ankle or foot and hold at the top for balance. Hold something lightly for balance if needed.

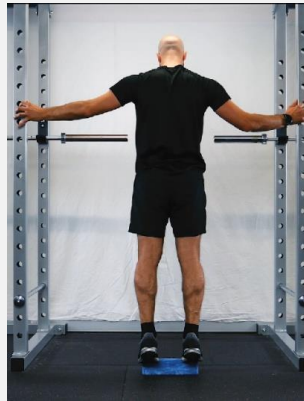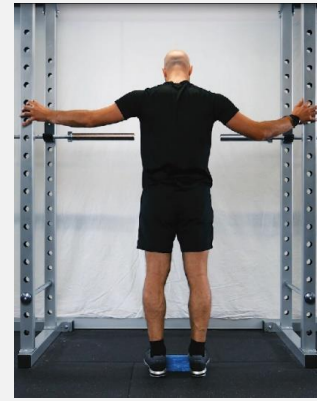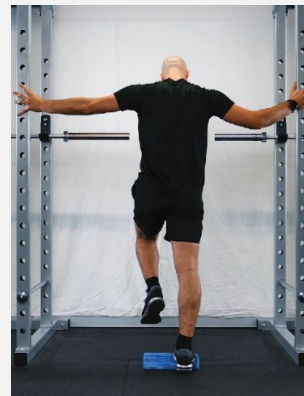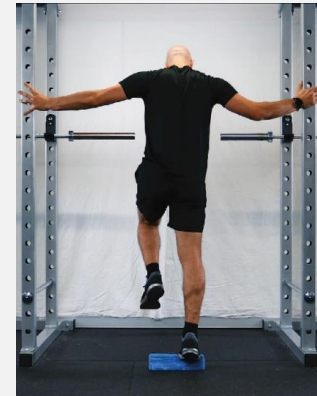

#### Option 2 – Calf raise with weights

Same exercise as option 1 but add a weight in your opposite hand to make the exercise harder.

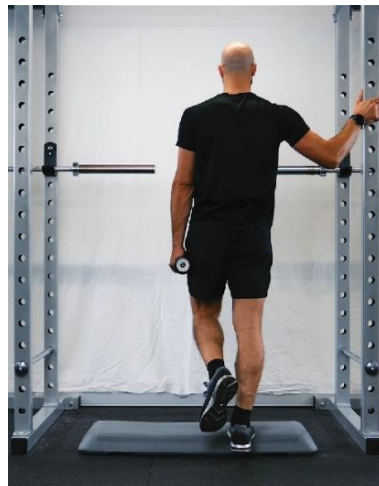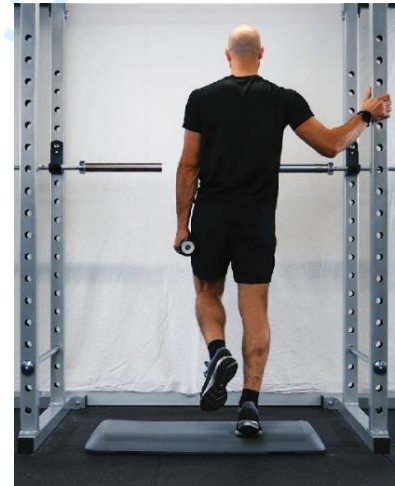



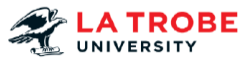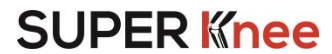

1  
2  
3  
4  
5  
6  
7  
8  
9  
10  
11  
12  
13  
14  
15  
16  
17  
18  
19  
20  
21  
22  
23  
24  
25  
26  
27  
28  
29  
30  
31  
32  
33  
34  
35  
36  
37  
38  
39  
40  
41  
42  
43  
44  
45  
46  
47  
48  
49  
50  
51  
52  
53  
54  
55  
56  
57  
58  
59  
60

| Date | Exercise                                                                                 | Reps & Sets                                        | Weight                                             | RPE /10                                            |
|------|------------------------------------------------------------------------------------------|----------------------------------------------------|----------------------------------------------------|----------------------------------------------------|
|      | 1 Quadriceps<br>2 Hamstrings<br>3 Plyometric power<br>4 Trunk/core<br>5 Hips<br>6 Calves | -----<br>-----<br>-----<br>-----<br>-----<br>----- | -----<br>-----<br>-----<br>-----<br>-----<br>----- | -----<br>-----<br>-----<br>-----<br>-----<br>----- |
|      | 1 Quadriceps<br>2 Hamstrings<br>3 Plyometric power<br>4 Trunk/core<br>5 Hips<br>6 Calves | -----<br>-----<br>-----<br>-----<br>-----<br>----- | -----<br>-----<br>-----<br>-----<br>-----<br>----- | -----<br>-----<br>-----<br>-----<br>-----<br>----- |
|      | 1 Quadriceps<br>2 Hamstrings<br>3 Plyometric power<br>4 Trunk/core<br>5 Hips<br>6 Calves | -----<br>-----<br>-----<br>-----<br>-----<br>----- | -----<br>-----<br>-----<br>-----<br>-----<br>----- | -----<br>-----<br>-----<br>-----<br>-----<br>----- |
|      | 1 Quadriceps<br>2 Hamstrings<br>3 Plyometric power<br>4 Trunk/core<br>5 Hips<br>6 Calves | -----<br>-----<br>-----<br>-----<br>-----<br>----- | -----<br>-----<br>-----<br>-----<br>-----<br>----- | -----<br>-----<br>-----<br>-----<br>-----<br>----- |
|      | 1 Quadriceps<br>2 Hamstrings<br>3 Plyometric power<br>4 Trunk/core<br>5 Hips<br>6 Calves | -----<br>-----<br>-----<br>-----<br>-----<br>----- | -----<br>-----<br>-----<br>-----<br>-----<br>----- | -----<br>-----<br>-----<br>-----<br>-----<br>----- |
|      | 1 Quadriceps<br>2 Hamstrings<br>3 Plyometric power<br>4 Trunk/core<br>5 Hips<br>6 Calves | -----<br>-----<br>-----<br>-----<br>-----<br>----- | -----<br>-----<br>-----<br>-----<br>-----<br>----- | -----<br>-----<br>-----<br>-----<br>-----<br>----- |
|      | 1 Quadriceps<br>2 Hamstrings<br>3 Plyometric power<br>4 Trunk/core<br>5 Hips<br>6 Calves | -----<br>-----<br>-----<br>-----<br>-----<br>----- | -----<br>-----<br>-----<br>-----<br>-----<br>----- | -----<br>-----<br>-----<br>-----<br>-----<br>----- |
|      | 1 Quadriceps<br>2 Hamstrings<br>3 Plyometric power<br>4 Trunk/core<br>5 Hips<br>6 Calves | -----<br>-----<br>-----<br>-----<br>-----<br>----- | -----<br>-----<br>-----<br>-----<br>-----<br>----- | -----<br>-----<br>-----<br>-----<br>-----<br>----- |

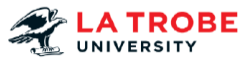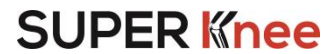

1  
2  
3  
4  
5  
6  
7  
8  
9  
10  
11  
12  
13  
14  
15  
16  
17  
18  
19  
20  
21  
22  
23  
24  
25  
26  
27  
28  
29  
30  
31  
32  
33  
34  
35  
36  
37  
38  
39  
40  
41  
42  
43  
44  
45  
46  
47  
48  
49  
50  
51  
52  
53  
54  
55  
56  
57  
58  
59  
60

| Date | Exercise                                                                                 | Reps & Sets                                        | Weight                                             | RPE /10                                            |
|------|------------------------------------------------------------------------------------------|----------------------------------------------------|----------------------------------------------------|----------------------------------------------------|
|      | 1 Quadriceps<br>2 Hamstrings<br>3 Plyometric power<br>4 Trunk/core<br>5 Hips<br>6 Calves | -----<br>-----<br>-----<br>-----<br>-----<br>----- | -----<br>-----<br>-----<br>-----<br>-----<br>----- | -----<br>-----<br>-----<br>-----<br>-----<br>----- |
|      | 1 Quadriceps<br>2 Hamstrings<br>3 Plyometric power<br>4 Trunk/core<br>5 Hips<br>6 Calves | -----<br>-----<br>-----<br>-----<br>-----<br>----- | -----<br>-----<br>-----<br>-----<br>-----<br>----- | -----<br>-----<br>-----<br>-----<br>-----<br>----- |
|      | 1 Quadriceps<br>2 Hamstrings<br>3 Plyometric power<br>4 Trunk/core<br>5 Hips<br>6 Calves | -----<br>-----<br>-----<br>-----<br>-----<br>----- | -----<br>-----<br>-----<br>-----<br>-----<br>----- | -----<br>-----<br>-----<br>-----<br>-----<br>----- |
|      | 1 Quadriceps<br>2 Hamstrings<br>3 Plyometric power<br>4 Trunk/core<br>5 Hips<br>6 Calves | -----<br>-----<br>-----<br>-----<br>-----<br>----- | -----<br>-----<br>-----<br>-----<br>-----<br>----- | -----<br>-----<br>-----<br>-----<br>-----<br>----- |
|      | 1 Quadriceps<br>2 Hamstrings<br>3 Plyometric power<br>4 Trunk/core<br>5 Hips<br>6 Calves | -----<br>-----<br>-----<br>-----<br>-----<br>----- | -----<br>-----<br>-----<br>-----<br>-----<br>----- | -----<br>-----<br>-----<br>-----<br>-----<br>----- |
|      | 1 Quadriceps<br>2 Hamstrings<br>3 Plyometric power<br>4 Trunk/core<br>5 Hips<br>6 Calves | -----<br>-----<br>-----<br>-----<br>-----<br>----- | -----<br>-----<br>-----<br>-----<br>-----<br>----- | -----<br>-----<br>-----<br>-----<br>-----<br>----- |
|      | 1 Quadriceps<br>2 Hamstrings<br>3 Plyometric power<br>4 Trunk/core<br>5 Hips<br>6 Calves | -----<br>-----<br>-----<br>-----<br>-----<br>----- | -----<br>-----<br>-----<br>-----<br>-----<br>----- | -----<br>-----<br>-----<br>-----<br>-----<br>----- |
|      | 1 Quadriceps<br>2 Hamstrings<br>3 Plyometric power<br>4 Trunk/core<br>5 Hips<br>6 Calves | -----<br>-----<br>-----<br>-----<br>-----<br>----- | -----<br>-----<br>-----<br>-----<br>-----<br>----- | -----<br>-----<br>-----<br>-----<br>-----<br>----- |

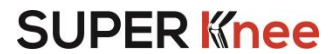

1  
2  
3  
4  
5  
6  
7  
8  
9  
10  
11  
12  
13  
14  
15  
16  
17  
18  
19  
20  
21  
22  
23  
24  
25  
26  
27  
28  
29  
30  
31  
32  
33  
34  
35  
36  
37  
38  
39  
40  
41  
42  
43  
44  
45  
46  
47  
48  
49  
50  
51  
52  
53  
54  
55  
56  
57  
58  
59  
60

| Date | Exercise                                                                                 | Reps & Sets                                        | Weight                                             | RPE /10                                            |
|------|------------------------------------------------------------------------------------------|----------------------------------------------------|----------------------------------------------------|----------------------------------------------------|
|      | 1 Quadriceps<br>2 Hamstrings<br>3 Plyometric power<br>4 Trunk/core<br>5 Hips<br>6 Calves | -----<br>-----<br>-----<br>-----<br>-----<br>----- | -----<br>-----<br>-----<br>-----<br>-----<br>----- | -----<br>-----<br>-----<br>-----<br>-----<br>----- |
|      | 1 Quadriceps<br>2 Hamstrings<br>3 Plyometric power<br>4 Trunk/core<br>5 Hips<br>6 Calves | -----<br>-----<br>-----<br>-----<br>-----<br>----- | -----<br>-----<br>-----<br>-----<br>-----<br>----- | -----<br>-----<br>-----<br>-----<br>-----<br>----- |
|      | 1 Quadriceps<br>2 Hamstrings<br>3 Plyometric power<br>4 Trunk/core<br>5 Hips<br>6 Calves | -----<br>-----<br>-----<br>-----<br>-----<br>----- | -----<br>-----<br>-----<br>-----<br>-----<br>----- | -----<br>-----<br>-----<br>-----<br>-----<br>----- |
|      | 1 Quadriceps<br>2 Hamstrings<br>3 Plyometric power<br>4 Trunk/core<br>5 Hips<br>6 Calves | -----<br>-----<br>-----<br>-----<br>-----<br>----- | -----<br>-----<br>-----<br>-----<br>-----<br>----- | -----<br>-----<br>-----<br>-----<br>-----<br>----- |
|      | 1 Quadriceps<br>2 Hamstrings<br>3 Plyometric power<br>4 Trunk/core<br>5 Hips<br>6 Calves | -----<br>-----<br>-----<br>-----<br>-----<br>----- | -----<br>-----<br>-----<br>-----<br>-----<br>----- | -----<br>-----<br>-----<br>-----<br>-----<br>----- |
|      | 1 Quadriceps<br>2 Hamstrings<br>3 Plyometric power<br>4 Trunk/core<br>5 Hips<br>6 Calves | -----<br>-----<br>-----<br>-----<br>-----<br>----- | -----<br>-----<br>-----<br>-----<br>-----<br>----- | -----<br>-----<br>-----<br>-----<br>-----<br>----- |
|      | 1 Quadriceps<br>2 Hamstrings<br>3 Plyometric power<br>4 Trunk/core<br>5 Hips<br>6 Calves | -----<br>-----<br>-----<br>-----<br>-----<br>----- | -----<br>-----<br>-----<br>-----<br>-----<br>----- | -----<br>-----<br>-----<br>-----<br>-----<br>----- |
|      | 1 Quadriceps<br>2 Hamstrings<br>3 Plyometric power<br>4 Trunk/core<br>5 Hips<br>6 Calves | -----<br>-----<br>-----<br>-----<br>-----<br>----- | -----<br>-----<br>-----<br>-----<br>-----<br>----- | -----<br>-----<br>-----<br>-----<br>-----<br>----- |



1  
2  
3  
4  
5  
6  
7  
8  
9  
10  
11  
12  
13  
14  
15  
16  
17  
18  
19  
20  
21  
22  
23  
24  
25  
26  
27  
28  
29  
30  
31  
32  
33  
34  
35  
36  
37  
38  
39  
40  
41  
42  
43  
44  
45  
46  
47  
48  
49  
50  
51  
52  
53  
54  
55  
56  
57  
58  
59  
60

| Date | Exercise                                                                                 | Reps & Sets                                        | Weight                                             | RPE /10                                            |
|------|------------------------------------------------------------------------------------------|----------------------------------------------------|----------------------------------------------------|----------------------------------------------------|
|      | 1 Quadriceps<br>2 Hamstrings<br>3 Plyometric power<br>4 Trunk/core<br>5 Hips<br>6 Calves | -----<br>-----<br>-----<br>-----<br>-----<br>----- | -----<br>-----<br>-----<br>-----<br>-----<br>----- | -----<br>-----<br>-----<br>-----<br>-----<br>----- |
|      | 1 Quadriceps<br>2 Hamstrings<br>3 Plyometric power<br>4 Trunk/core<br>5 Hips<br>6 Calves | -----<br>-----<br>-----<br>-----<br>-----<br>----- | -----<br>-----<br>-----<br>-----<br>-----<br>----- | -----<br>-----<br>-----<br>-----<br>-----<br>----- |
|      | 1 Quadriceps<br>2 Hamstrings<br>3 Plyometric power<br>4 Trunk/core<br>5 Hips<br>6 Calves | -----<br>-----<br>-----<br>-----<br>-----<br>----- | -----<br>-----<br>-----<br>-----<br>-----<br>----- | -----<br>-----<br>-----<br>-----<br>-----<br>----- |
|      | 1 Quadriceps<br>2 Hamstrings<br>3 Plyometric power<br>4 Trunk/core<br>5 Hips<br>6 Calves | -----<br>-----<br>-----<br>-----<br>-----<br>----- | -----<br>-----<br>-----<br>-----<br>-----<br>----- | -----<br>-----<br>-----<br>-----<br>-----<br>----- |
|      | 1 Quadriceps<br>2 Hamstrings<br>3 Plyometric power<br>4 Trunk/core<br>5 Hips<br>6 Calves | -----<br>-----<br>-----<br>-----<br>-----<br>----- | -----<br>-----<br>-----<br>-----<br>-----<br>----- | -----<br>-----<br>-----<br>-----<br>-----<br>----- |
|      | 1 Quadriceps<br>2 Hamstrings<br>3 Plyometric power<br>4 Trunk/core<br>5 Hips<br>6 Calves | -----<br>-----<br>-----<br>-----<br>-----<br>----- | -----<br>-----<br>-----<br>-----<br>-----<br>----- | -----<br>-----<br>-----<br>-----<br>-----<br>----- |
|      | 1 Quadriceps<br>2 Hamstrings<br>3 Plyometric power<br>4 Trunk/core<br>5 Hips<br>6 Calves | -----<br>-----<br>-----<br>-----<br>-----<br>----- | -----<br>-----<br>-----<br>-----<br>-----<br>----- | -----<br>-----<br>-----<br>-----<br>-----<br>----- |
|      | 1 Quadriceps<br>2 Hamstrings<br>3 Plyometric power<br>4 Trunk/core<br>5 Hips<br>6 Calves | -----<br>-----<br>-----<br>-----<br>-----<br>----- | -----<br>-----<br>-----<br>-----<br>-----<br>----- | -----<br>-----<br>-----<br>-----<br>-----<br>----- |



| Date | Exercise                                                                                 | Reps & Sets                                        | Weight                                             | RPE /10                                            |
|------|------------------------------------------------------------------------------------------|----------------------------------------------------|----------------------------------------------------|----------------------------------------------------|
|      | 1 Quadriceps<br>2 Hamstrings<br>3 Plyometric power<br>4 Trunk/core<br>5 Hips<br>6 Calves | -----<br>-----<br>-----<br>-----<br>-----<br>----- | -----<br>-----<br>-----<br>-----<br>-----<br>----- | -----<br>-----<br>-----<br>-----<br>-----<br>----- |
|      | 1 Quadriceps<br>2 Hamstrings<br>3 Plyometric power<br>4 Trunk/core<br>5 Hips<br>6 Calves | -----<br>-----<br>-----<br>-----<br>-----<br>----- | -----<br>-----<br>-----<br>-----<br>-----<br>----- | -----<br>-----<br>-----<br>-----<br>-----<br>----- |
|      | 1 Quadriceps<br>2 Hamstrings<br>3 Plyometric power<br>4 Trunk/core<br>5 Hips<br>6 Calves | -----<br>-----<br>-----<br>-----<br>-----<br>----- | -----<br>-----<br>-----<br>-----<br>-----<br>----- | -----<br>-----<br>-----<br>-----<br>-----<br>----- |
|      | 1 Quadriceps<br>2 Hamstrings<br>3 Plyometric power<br>4 Trunk/core<br>5 Hips<br>6 Calves | -----<br>-----<br>-----<br>-----<br>-----<br>----- | -----<br>-----<br>-----<br>-----<br>-----<br>----- | -----<br>-----<br>-----<br>-----<br>-----<br>----- |
|      | 1 Quadriceps<br>2 Hamstrings<br>3 Plyometric power<br>4 Trunk/core<br>5 Hips<br>6 Calves | -----<br>-----<br>-----<br>-----<br>-----<br>----- | -----<br>-----<br>-----<br>-----<br>-----<br>----- | -----<br>-----<br>-----<br>-----<br>-----<br>----- |
|      | 1 Quadriceps<br>2 Hamstrings<br>3 Plyometric power<br>4 Trunk/core<br>5 Hips<br>6 Calves | -----<br>-----<br>-----<br>-----<br>-----<br>----- | -----<br>-----<br>-----<br>-----<br>-----<br>----- | -----<br>-----<br>-----<br>-----<br>-----<br>----- |
|      | 1 Quadriceps<br>2 Hamstrings<br>3 Plyometric power<br>4 Trunk/core<br>5 Hips<br>6 Calves | -----<br>-----<br>-----<br>-----<br>-----<br>----- | -----<br>-----<br>-----<br>-----<br>-----<br>----- | -----<br>-----<br>-----<br>-----<br>-----<br>----- |
|      | 1 Quadriceps<br>2 Hamstrings<br>3 Plyometric power<br>4 Trunk/core<br>5 Hips<br>6 Calves | -----<br>-----<br>-----<br>-----<br>-----<br>----- | -----<br>-----<br>-----<br>-----<br>-----<br>----- | -----<br>-----<br>-----<br>-----<br>-----<br>----- |

1  
2  
3  
4  
5  
6  
7  
8  
9  
10  
11  
12  
13  
14  
15  
16  
17  
18  
19  
20  
21  
22  
23  
24  
25  
26  
27  
28  
29  
30  
31  
32  
33  
34  
35  
36  
37  
38  
39  
40  
41  
42  
43  
44  
45  
46  
47  
48  
49  
50  
51  
52  
53  
54  
55  
56  
57  
58  
59  
60

| Date | Exercise                                                                                 | Reps & Sets                                        | Weight                                             | RPE /10                                            |
|------|------------------------------------------------------------------------------------------|----------------------------------------------------|----------------------------------------------------|----------------------------------------------------|
|      | 1 Quadriceps<br>2 Hamstrings<br>3 Plyometric power<br>4 Trunk/core<br>5 Hips<br>6 Calves | -----<br>-----<br>-----<br>-----<br>-----<br>----- | -----<br>-----<br>-----<br>-----<br>-----<br>----- | -----<br>-----<br>-----<br>-----<br>-----<br>----- |
|      | 1 Quadriceps<br>2 Hamstrings<br>3 Plyometric power<br>4 Trunk/core<br>5 Hips<br>6 Calves | -----<br>-----<br>-----<br>-----<br>-----<br>----- | -----<br>-----<br>-----<br>-----<br>-----<br>----- | -----<br>-----<br>-----<br>-----<br>-----<br>----- |
|      | 1 Quadriceps<br>2 Hamstrings<br>3 Plyometric power<br>4 Trunk/core<br>5 Hips<br>6 Calves | -----<br>-----<br>-----<br>-----<br>-----<br>----- | -----<br>-----<br>-----<br>-----<br>-----<br>----- | -----<br>-----<br>-----<br>-----<br>-----<br>----- |
|      | 1 Quadriceps<br>2 Hamstrings<br>3 Plyometric power<br>4 Trunk/core<br>5 Hips<br>6 Calves | -----<br>-----<br>-----<br>-----<br>-----<br>----- | -----<br>-----<br>-----<br>-----<br>-----<br>----- | -----<br>-----<br>-----<br>-----<br>-----<br>----- |
|      | 1 Quadriceps<br>2 Hamstrings<br>3 Plyometric power<br>4 Trunk/core<br>5 Hips<br>6 Calves | -----<br>-----<br>-----<br>-----<br>-----<br>----- | -----<br>-----<br>-----<br>-----<br>-----<br>----- | -----<br>-----<br>-----<br>-----<br>-----<br>----- |
|      | 1 Quadriceps<br>2 Hamstrings<br>3 Plyometric power<br>4 Trunk/core<br>5 Hips<br>6 Calves | -----<br>-----<br>-----<br>-----<br>-----<br>----- | -----<br>-----<br>-----<br>-----<br>-----<br>----- | -----<br>-----<br>-----<br>-----<br>-----<br>----- |
|      | 1 Quadriceps<br>2 Hamstrings<br>3 Plyometric power<br>4 Trunk/core<br>5 Hips<br>6 Calves | -----<br>-----<br>-----<br>-----<br>-----<br>----- | -----<br>-----<br>-----<br>-----<br>-----<br>----- | -----<br>-----<br>-----<br>-----<br>-----<br>----- |
|      | 1 Quadriceps<br>2 Hamstrings<br>3 Plyometric power<br>4 Trunk/core<br>5 Hips<br>6 Calves | -----<br>-----<br>-----<br>-----<br>-----<br>----- | -----<br>-----<br>-----<br>-----<br>-----<br>----- | -----<br>-----<br>-----<br>-----<br>-----<br>----- |
|      | 1 Quadriceps<br>2 Hamstrings<br>3 Plyometric power<br>4 Trunk/core<br>5 Hips<br>6 Calves | -----<br>-----<br>-----<br>-----<br>-----<br>----- | -----<br>-----<br>-----<br>-----<br>-----<br>----- | -----<br>-----<br>-----<br>-----<br>-----<br>----- |

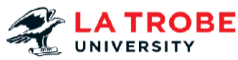

| Date | Exercise           | Reps & Sets | Weight | RPE /10 |
|------|--------------------|-------------|--------|---------|
|      | 1 Quadriceps       | -----       | -----  | -----   |
|      | 2 Hamstrings       | -----       | -----  | -----   |
|      | 3 Plyometric power | -----       | -----  | -----   |
|      | 4 Trunk/core       | -----       | -----  | -----   |
|      | 5 Hips             | -----       | -----  | -----   |
|      | 6 Calves           | -----       | -----  | -----   |
|      | 1 Quadriceps       | -----       | -----  | -----   |
|      | 2 Hamstrings       | -----       | -----  | -----   |
|      | 3 Plyometric power | -----       | -----  | -----   |
|      | 4 Trunk/core       | -----       | -----  | -----   |
|      | 5 Hips             | -----       | -----  | -----   |
|      | 6 Calves           | -----       | -----  | -----   |
|      | 1 Quadriceps       | -----       | -----  | -----   |
|      | 2 Hamstrings       | -----       | -----  | -----   |
|      | 3 Plyometric power | -----       | -----  | -----   |
|      | 4 Trunk/core       | -----       | -----  | -----   |
|      | 5 Hips             | -----       | -----  | -----   |
|      | 6 Calves           | -----       | -----  | -----   |
|      | 1 Quadriceps       | -----       | -----  | -----   |
|      | 2 Hamstrings       | -----       | -----  | -----   |
|      | 3 Plyometric power | -----       | -----  | -----   |
|      | 4 Trunk/core       | -----       | -----  | -----   |
|      | 5 Hips             | -----       | -----  | -----   |
|      | 6 Calves           | -----       | -----  | -----   |
|      | 1 Quadriceps       | -----       | -----  | -----   |
|      | 2 Hamstrings       | -----       | -----  | -----   |
|      | 3 Plyometric power | -----       | -----  | -----   |
|      | 4 Trunk/core       | -----       | -----  | -----   |
|      | 5 Hips             | -----       | -----  | -----   |
|      | 6 Calves           | -----       | -----  | -----   |

**Supplementary File 4.** Details of physical performance tests*Battery of hops: single hop, triple crossover hop, and side hop*

The single hop for distance assesses the distance (cm) the participant can hop from a stationary position, taking off and landing on the same foot. The triple cross-over hop for distance assesses the cumulative distance (cm) the participant can achieve by hopping three consecutive times, crossing over the outside of two strips of tape placed 15cm apart each time. The side-hop evaluates the number of hops participants can achieve (hopping side to side outside two parallel strips of tape placed 40cm apart on the floor) in 30 seconds. The vertical hop assesses the maximal height participants can hop from a stationary position. For all hop tests, participants wear their usual athletic footwear, start with their left leg (regardless of ACLR limb) and hands held behind the back. If participants make subsequent smaller hops, separate their hands or do not remain balanced, the hop is not recorded. Single, triple cross-over and vertical hops are repeated until at least three successful trials are recorded and no increase in distance is observed. The left leg is tested first.

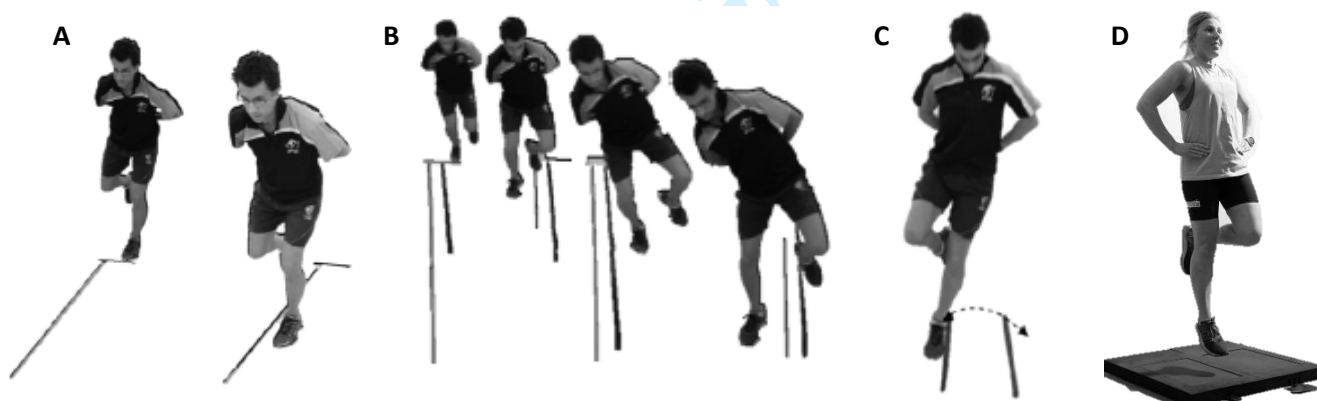

**Figure SF3.1.** Battery of hop tests. **A:** Single hop for distance; **B:** Side-hop; **C:** Triple-crossover hop for distance; **D:** Vertical hop



### *One-leg rise*

For the one-leg rise, participants sit on the edge of a plinth with the heel of the test leg on a marked line 10cm in front of the edge of the plinth. Plinth height is adjusted so the angle of the test knee in sitting is 90°. With arms folded across the chest, participants are instructed to rise from sitting to standing on one leg, achieve full knee extension, and return to lightly touch the plinth with buttocks. Rises are performed to a metronome to maintain a consistent cadence of 45 beats per minute. The maximum number of rises achieved at the predetermined cadence is recorded. The left leg is tested first.

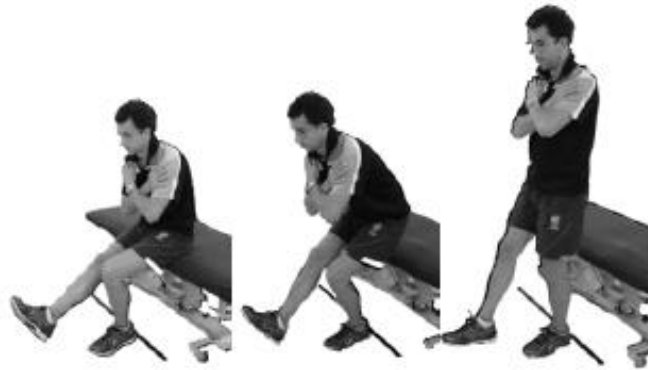

**Figure SF3.2** One leg rise test

### *Knee muscle strength*

Maximal voluntary isometric contractions are evaluated during knee extension and flexion with the knee flexed to 60° using an isokinetic dynamometer (Biodex Medical Systems, NY, USA). Participants are seated (hips/non-tested knee flexed 90°) and the centre of the knee joint is aligned with the axis of the dynamometer. Four belts are used to stabilise the trunk and non-test limb, two crossing the trunk, one around the pelvis and one on the distal thigh. An inelastic strap fixed to the dynamometer arm is placed around the distal tibia (proximal to the ankle).

Two submaximal practice contractions of 5-seconds with an interval of 30-seconds between trials are performed as a familiarisation procedure. Then, with standardised verbal encouragement, three maximal isometric contractions of 5-seconds with an interval of 30-seconds between each trial are performed. The test alternates between knee extension and knee flexion (three trials for each). The left leg is tested first. Force curves will be recorded for all trials and the peak force (Nm), normalised for body mass as appropriate (Nm/kg), used for analyses. Knee extension and flexion rate of force development will also be assessed using the slope (change in force divided by change in time) of muscle contraction onset. To correct the influence of gravity, the assessed limb is weighed before each test and the data acquisition software automatically corrects the output data.

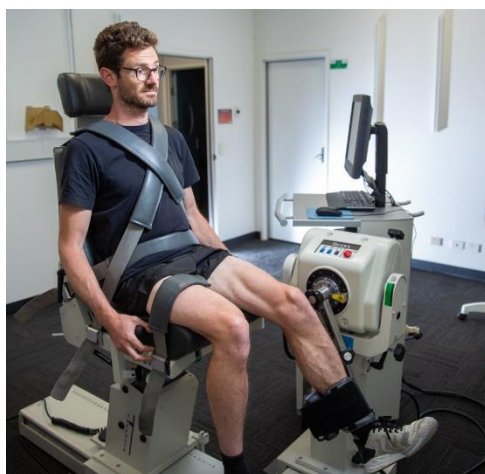

**Figure SF3.3** Set up of knee muscle strength assessment using Biodex isokinetic dynamometer

**Supplementary File 5.** Details of magnetic resonance imaging sequences acquired

|                        | <b>Proton Density weighted fat suppressed fast spin-echo<br/><i>Axial</i></b> | <b>Proton Density weighted fat suppressed fast spin-echo<br/><i>Sagittal</i></b> | <b>Proton Density weighted fat suppressed fast spin-echo<br/><i>Coronal</i></b> | <b>Multi-echo spin-echo (MESE) T2 relaxation time mapping<br/><i>Sagittal</i></b> | <b>Fast spoiled gradient echo (FSPGR)<br/><i>Sagittal</i></b> |
|------------------------|-------------------------------------------------------------------------------|----------------------------------------------------------------------------------|---------------------------------------------------------------------------------|-----------------------------------------------------------------------------------|---------------------------------------------------------------|
| Repetition time (msec) | 3725                                                                          | 2300                                                                             | 2325                                                                            | 3225                                                                              | 10.3                                                          |
| Echo time (msec)       | 36                                                                            | 36                                                                               | 36                                                                              | 10, 20, 30, 40, 50, 60, 70, 80                                                    | Minimum (~3.7)                                                |
| Acquisition matrix     | 340 x 300                                                                     | 360 x 300                                                                        | 340 x 300                                                                       | 320 x 269                                                                         | 512 x 512                                                     |
| Field of view (cm)     | 16                                                                            | 16                                                                               | 16                                                                              | 12                                                                                | 16                                                            |
| Resolution (mm)        | 0.471 x 0.533 x 3.0                                                           | 0.444 x 0.5333 x 3.0                                                             | 0.471 x 0.5333 x 3.0                                                            | 0.375 x 0.446 x 3.0                                                               | 0.313 x 0.313 x 1.5                                           |
| Slice thickness (mm)   | 3.0                                                                           | 3.0                                                                              | 3.0                                                                             | 3.0                                                                               | 1.5                                                           |
| Slice gap (mm)         | 0.3                                                                           | 1.0                                                                              | 0.3                                                                             | 1.0                                                                               | 0                                                             |
| Flip angle (°)         | 142                                                                           | 142                                                                              | 142                                                                             | 90                                                                                | 12                                                            |
| Number of echoes       | 10                                                                            | 10                                                                               | 9                                                                               | 8                                                                                 | -                                                             |
| Number of slices       | 32                                                                            | 31                                                                               | 34                                                                              | 31                                                                                | 84                                                            |
| Number of excitations  | 1                                                                             | 1                                                                                | 1                                                                               | 0.5                                                                               | 1                                                             |
| Bandwidth              | 50                                                                            | 35.71                                                                            | 35.71                                                                           | 31.25                                                                             | 31.25                                                         |
| Scan time (mins)       | 2:59                                                                          | 2:55                                                                             | 4:21                                                                            | 7:51                                                                              | 15.08                                                         |

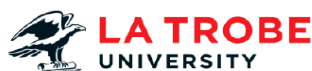

## Participant Information Sheet/Consent Form

### Interventional Study - Adult providing own consent

|                                                                    |                                                                                                                                                                                                                                                                                                                                      |
|--------------------------------------------------------------------|--------------------------------------------------------------------------------------------------------------------------------------------------------------------------------------------------------------------------------------------------------------------------------------------------------------------------------------|
| <b>Title</b>                                                       | Optimising outcomes after anterior cruciate ligament reconstruction: SUPER KNEE randomised controlled trial                                                                                                                                                                                                                          |
| <b>Short Title</b>                                                 | The SUPER KNEE trial                                                                                                                                                                                                                                                                                                                 |
| <b>Ethics Reference Number</b>                                     | HEC19447                                                                                                                                                                                                                                                                                                                             |
| <b>Project Sponsor</b>                                             | La Trobe University                                                                                                                                                                                                                                                                                                                  |
| <b>Coordinating Principal Investigator/ Principal Investigator</b> | Prof. Kay Crossley (La Trobe University)                                                                                                                                                                                                                                                                                             |
| <b>Associate Investigators</b>                                     | Dr Adam Culvenor (La Trobe University)<br>Dr Christian Barton (La Trobe University)<br>Prof. Ewa Roos (Southern Denmark University)<br>Prof. Steven McPhail (Queensland University of Technology)<br>Ass. Prof. Edwin Oei (Erasmus Medical Centre)<br>Dr Andrea Bruder (La Trobe University)<br>Mr Thomas West (La Trobe University) |
| <b>Location</b>                                                    | La Trobe University                                                                                                                                                                                                                                                                                                                  |

## Part 1 What does my participation involve?

### 1 Introduction

You are invited to take part in this research project because you have had an anterior cruciate ligament (ACL) reconstruction within the last 9-36 months. The research project aims to compare the effectiveness of two different exercise and activity monitoring programs to optimise your knee symptoms, function and activity level and maximise your quality of life.

This Participant Information Sheet/Consent Form tells you about the research project. It explains the tests and treatments involved. Knowing what is involved will help you decide if you want to take part in the research.

Please read this information carefully. Ask questions about anything that you don't understand or want to know more about. Before deciding whether or not to take part, you might want to talk about it with a relative, friend or your local doctor.

#### **Your participation is voluntary**

Participation in this research is completely voluntary and there will be no cost to you. If you don't wish to take part, you don't have to. You will receive the best possible care whether or not you take part.

If you decide to take part and later change your mind, you are free to withdraw at any stage. Your decision whether to take part or not to take part, or to take part and then withdraw, will not affect your routine treatment, your relationship with those treating you, or your relationship with La Trobe University or the hospital/orthopaedic surgeon who performed your ACL surgery.

If you decide you want to take part in the research project, you will be given a copy of this Participant Information Sheet and asked to sign the consent section. By signing it you are telling us that you:

- Understand what you have read
- Consent to take part in the research project
- Consent to have the tests and treatments that are described
- Consent to the use of your personal and health information as described.

### ***Your withdrawal from the study***

You are under no obligation to continue with the research study. You may change your mind at any time about participating in the research. People withdraw from studies for various reasons and you do not need to provide a reason.

You can withdraw from the study at any time by completing and signing the 'Participant Withdrawal of Consent Form'. This form is provided at the end of this document and is to be completed by you and supplied to the research team if you choose to withdraw at a later date.

If you withdraw from the study, you will be able to choose whether the study will destroy or retain the information it has collected about you. Information about you that has already been analysed (i.e., once you have been allocated to either exercise program), may not be able to be destroyed to ensure accurate and unbiased study reporting. Personal details collected, such as your name and contact details, can be destroyed at any time upon study withdrawal.

## **2 What is the purpose of this research?**

As you may be aware, many people who have had an ACL reconstruction do not recover to a level that they are satisfied with. Therefore, it is important to investigate treatments that can improve outcomes. The purpose of this study is to investigate whether two different exercise and activity monitoring programs can improve knee symptoms, function, physical activity and quality of life, and prevent knee arthritis. We will recruit 184 adults who have not completely recovered at 9-36 months after ACL reconstruction in Australia.

This study is being coordinated by researchers at La Trobe University. It is supported by international researchers and has been funded by an Australian National Health and Medical Research Council Project Grant. All assessments and treatment will be at **no cost** to you.

## **3 Who can participate?**

You can participate in the study if you meet all the following:

- Have had ACL reconstruction surgery 9-36 months previously
- Be aged 18-40 years at the time of your ACL reconstruction
- Have not completely recovered from your ACL reconstruction, assessed by a questionnaire (provided by the researchers)
- Willing to complete exercises 2-3 times per week

You are not eligible and cannot participate in this study if you meet any of the following:

- Have had another knee injury/surgery or knee injection in the past 3 months
- Have had physiotherapy treatment for your knee in the past 6 weeks
- Have another injury or health condition that affects your ability to perform functional tasks and exercises
- Have contraindications for MRI (e.g. pacemaker, a history of metallic foreign body in the eye, previous surgery for cerebral aneurysm, other implanted metal material other than your ACL graft or claustrophobia)
- Currently pregnant or breastfeeding
- Planning on relocating interstate or overseas in the next 18 months or unable to commit to the various study assessments over the next 18 months (as detailed below)
- Unable to understand written and/or spoken English

#### 4 What does participation in this research involve?

If you agree to participate in this study, you will be asked to sign the participant consent form before any study assessments are performed. This study will be conducted over 18 months in total (see flowchart on next page).

##### ***A comprehensive knee assessment by a physiotherapist***

For the first assessment at the start of the study, you will attend La Trobe University. At this testing session you should allow approximately 2 hours, where you will undergo a physical examination by a physiotherapist. You will be asked to wear shorts and a small piece of stocking (provided) over both of your knees during some tests so that the examiner is unable to tell which knee is your operated one. The tests conducted in the physical examination will include a measure of knee movement and joint swelling, activities including squatting and hopping, and measures of muscle strength (quadriceps and hamstrings). Muscle strength will be assessed using a special chair and you will be asked to push up and down a few times against an ankle pad as hard as you can. We will also measure and record your height, weight and waist circumference. We will video your performance during clinical tests (e.g. single-leg squat and jump). These videos will not include your face, so you cannot be identified from the footage. If any of your face (or other identifying feature) is inadvertently videoed, this will be masked (by electronically blurring the area) prior to data analysis.

You will also be asked to complete a series of questionnaires related to pain, physical function, confidence with physical movements and physical activity, as well as details about your knee injury/pain (e.g. injury mechanism, location of pain; history of pain). These may be completed in person at the testing session or online via link provided by email.

If you are interested, you may also undergo a 3D biomechanics assessment at the La Trobe University gait laboratory. This is optional and takes an additional 30-60mins. Small reflective skin markers will be attached to your skin (with tape on arms, pelvis, legs) and tracked with infrared cameras when you walk, run and perform hopping tasks.

##### ***A knee MRI***

You will also attend Lake Imaging Specialist and Research Centre, North Melbourne (within 1-week of your assessment at La Trobe University) where you will have a magnetic resonance imaging (MRI) scan of your reconstructed and possibly your other knee (if uninjured). For the MRI scan you will be asked to lie on a narrow table that can slide inside a large tunnel-like tube with a scanner. The scanner creates a magnetic field around you, then pulses radio waves at the knee. This does not contain any radiation. It is very important that you keep very still during the scanning. All imaging will be provided at **no cost** to you and will take approximately 25-45 mins to complete.

##### ***Random assignment to one of two different treatments***

At the end of the first assessment at La Trobe University you will be randomly assigned (50:50 chance, like a coin toss) by a computer system to receive one of the exercise and activity monitoring programs provided by physiotherapists to increase lower-limb muscle strength, power, endurance and agility. This means neither you or the researchers will be able to choose which group you are assigned to. We do not know which treatment is best. To find out we need to compare the different treatments. There is equal chance that you will receive either treatment. All treatment will be at **no cost** to you.



**Figure 1. Flowchart of study assessments**

If you are randomised to receive **Treatment A**, you will receive a “best-practice guide” booklet and a face-to-face appointment with a physiotherapist to explain the exercises and education in the booklet. Your physical activity and sports participation will be monitored with fortnightly (for first 4 months) and monthly (after first 4 months) online questionnaires. You will also be provided with an activity monitor (Garmin™ watch) to count your steps.

If you are randomised to receive **Treatment B**, you will receive 2 x per week face-to-face appointments for 4 months with a physiotherapist to perform muscle strength and agility/balance exercises. We have trained physiotherapists at clinics throughout Melbourne and Victoria to be convenient for you to attend. We will offer reimbursement for travel costs to attend each local physiotherapy appointment. You will have the option to access a gym (located conveniently for you and at no cost) at the 4-month assessment to continue to perform strengthening exercises up to 12-months after baseline. We will monitor your physical activity in the same way, and you will also get a physical activity monitor (Garmin™ watch) to measure your daily step count.

### **Follow-up assessments**

At 4-months after baseline assessment, the same assessments will be repeated (questionnaires, hop tests and MRI) at Lake Imaging Specialist and Research Centre, North Melbourne and La Trobe University. At 12-months after baseline assessment, all assessments will be repeated: questionnaires, physical examination at La Trobe University, and MRI at Lake Imaging Specialist and Research Centre, North Melbourne. At completion of the study (18-months after baseline), the same online questionnaires will be repeated only.

There are no additional costs associated with participating in this research project. All medical care required as part of the research project will be provided free of charge. Your travel costs to attend the assessments will be reimbursed up to \$100.

## **5 What else do I have to do?**

In addition to the assessments conducted at baseline, 4-, 12- and 18-months, you will be asked to record the exercises you have completed in a log book. You will also be asked to record any other healthcare treatments you receive during the study. This will be recorded in the fortnightly/monthly online questionnaire. You will otherwise be able to carry on with your normal lifestyle. It is also important for us to know about your surgical details (e.g. technique, cartilage/meniscus treatment), so we will request to access your surgical notes.

At the end of the first 4 months, or after 12 months, we may also ask if you are willing to have a separate interview with one of the study researchers. The purpose of this interview is to seek

feedback on the study interventions, satisfaction with the process received and whether there are any suggestions for improvement. The interview will take approximately 30 minutes, but you can cease the interview at any time. To ensure responses are correctly interpreted, responses to questions will be audio recorded and transcribed. Audio recording transcriptions will be completed by 'Transcription Australia' on their secure, encrypted Australian-based software. Although voice in your audio recording could lead to your identification, this file will not be used during analysis. Instead a re-identifiable transcription, which you will have the opportunity to check for accuracy, will be used for analysis. Re-identifiable means that we will use a code number and not your name on data collected to ensure your anonymity. Following the completion of analysis of this transcription, the audio file associated with your interview will be deleted. After analysis, overall findings and conclusions from all interviews will also be sent to you, to allow an opportunity to make any further comments. We will seek around 40 participants to be interviewed (n=30 at 4 months, and n=30 at 12 months). It is your decision or not whether you wish to be interviewed.

## 6 What are the alternatives to participation?

You do not have to take part in this research project to receive treatment for your knee. Other options are available; these include attending physiotherapy (in a private practice or via the public hospital system). The research team will discuss these options with you before you decide whether or not to take part in this research project. You can also discuss the options with your surgeon, local doctor or physiotherapist.

## 7 What are the possible benefits of taking part?

We cannot guarantee or promise that you will receive any benefits from this research. However, possible benefits may include improved symptoms, function, quality of life, physical and sports activity, and confidence in your knee. You may also gain valuable insight into your physical functioning of your knee joint.

## 8 What are the possible risks and disadvantages of taking part?

The testing procedures and exercise-therapy treatments may cause side effects. You may have none, some or all of the effects listed below, and they may be mild, moderate or severe. If you have any of these side effects, or are worried about them, talk with the study coordinator.

| Possible Side Effect                                                                    | How often is it likely to occur?                                                                                  | How severe might it be?                                                                       | How long might it last?          |
|-----------------------------------------------------------------------------------------|-------------------------------------------------------------------------------------------------------------------|-----------------------------------------------------------------------------------------------|----------------------------------|
| <i>Muscle soreness</i>                                                                  | Commonly, after testing; or after a change in exercises                                                           | Muscle may be tender to touch, may notice pain when using muscles (e.g. going up/down stairs) | May last 2-3 days                |
| <i>Increase in knee pain or swelling</i>                                                | Rarely after testing; Rarely after exercise-therapy if instructions followed                                      | Mild<br>Moderate<br>Severe                                                                    | 2-3 days<br>3-7 days<br>> 1 week |
| <i>Re-injury (e.g. rupture of ACL graft), or injury to opposite knee (or ankle/hip)</i> | Extremely rare during testing or exercise (research team are only aware of 1 incident in 20+ years in this field) | Mild to severe                                                                                | Depends on injury – maybe months |



1 There may be side effects that the researchers do not expect or do not know about and that may  
2 be serious. Tell the researchers immediately if you get any new or unusual symptoms. Most side  
3 effects go away shortly after treatment ends. If a severe side effect or reaction occurs, the study  
4 coordinator may need to stop your treatment. The study coordinator will discuss the best way of  
5 managing any side effects with you.  
6  
7

### 8 *Muscle and joint soreness*

9 The physical tests and exercises represent usual examination and intervention by a  
10 physiotherapist. You may experience a small amount of discomfort in the joints or muscles.  
11 Please report to the researcher any discomfort or pain experienced during the testing or  
12 exercises. If the pain or discomfort is deemed to be excessive by yourself or the investigators,  
13 the testing/treatment will cease.  
14

### 15 *Re-injury*

16 There is a very slight risk of falling during the hopping tasks. During the physical tests and  
17 exercises, there is also an extremely low risk of re-injuring your ACL reconstructed knee. During  
18 the first 5 years after ACL reconstruction, approximately 5% of people will re-rupture their ACL  
19 graft, with almost all of these occurring during sport. To minimise the risk of graft rupture, an  
20 experienced physiotherapist will conduct all testing, and you can choose to not perform tests if  
21 you are not confident to do so. The exercises have been designed using the best available  
22 research, and you will be provided with criteria to appropriately progress the difficulty of exercises  
23 to minimise re-injury risk. In particular, before attempting sport, we strongly recommend approval  
24 from your surgeon and possibly a return to sport assessment by a health professional.  
25  
26

### 27 *Magnetic Resonance Imaging (MRI)*

28 When you lie in the MRI machine, the MRI team will make sure you are in a comfortable position  
29 so you can keep still. The scanner is very noisy and they can give you some earphones to reduce  
30 the noise. Some people may experience symptoms of claustrophobia from lying in a confined  
31 space. If you do experience discomfort at any time during the scan, you will be able to alert staff  
32 by pressing on a call button provided to you.  
33  
34

35 There are no proven long-term risks related to MRI scans. MRI is considered safe when performed  
36 at a centre with appropriate procedures. However, the magnetic attraction for some metal objects  
37 can pose a safety risk, so it is important that metal objects are not taken into the scanner room.  
38

39 The MRI team will examine you to make sure there is no reason for you not to have the scan. You  
40 must tell them if you have metal implanted in your body, such as a pacemaker or metal pins.  
41

42 The scans we are taking are for research purposes. They are not intended to be used like scans  
43 taken for a full clinical examination. The scans will not be used to help diagnose, treat or manage  
44 a particular condition. A specialist will look at your MRI scans for features relevant to the research  
45 project. This may be done by specialists we work with overseas – all identifying information (name,  
46 date of birth etc) will be removed from your MRI scans prior to analysis so that you will not be  
47 able to be identified. On rare occasions, the specialist may find an unusual feature that could have  
48 a significant risk to your health. If this happens, we will contact you and/or your health practitioner  
49 to talk about the findings. We cannot guarantee that we will find any/all unusual features. The MRI  
50 team will provide you with a copy of your MRI scans.  
51  
52

## 53 **9 Can I have other treatments during this research project?**

54 While you are participating in this research project, you should not participate in alternative or  
55 additional exercise-therapy (or physiotherapy). It is important to tell the study co-ordinator about  
56 any treatments or medications you may be taking, including over-the-counter medications,  
57 vitamins or herbal remedies, acupuncture or other alternative treatments. We prefer that you do  
58 not commence any new treatment during the research project. However, should you decide to do  
59 so, we require you to describe any treatments (including medications) in your "study log book".  
60

## 10 What happens when the research project ends?

At the completion of the research project, there will be no additional treatment provided by our research team. If you wish to continue with your exercise-therapy treatment, you can continue to use the resources provided to you. Any additional treatment (e.g. physiotherapy) that you might require at the completion of the research project will be at your own cost. If requested, we will provide you with your individual results and whole study results. We, or other researchers, may also use coded information (so that you cannot be identified) collected for this research study in future related studies. If you consent (tick the box on the consent form) to be contacted for future related research, we will store your contact details (name, address, phone number, email) on the secure La Trobe University research drive, only accessible to members of the research team, and may contact you about future related research projects.

## Part 2 How is the research project being conducted?

### 11 What will happen to information about me?

By signing the consent form you agree to the relevant research staff collecting and using personal information about you for the research project. Any information obtained in connection with this research project that can identify you will remain confidential and securely stored. It will be disclosed only with your permission, or in compliance with the law.

The research staff will also collect information on the health services you have used for the 6 months before, and 18 months after, baseline assessment. To collect this information, identifiable data (e.g. name, age, address) will be submitted to the Department of Human Services so that information about your health service usage can be obtained from a range of health datasets (e.g. Medicare Benefits Schedule (MBS), Pharmaceutical Benefits Scheme (PBS)) and linked to your study data. The health service data will be provided to the research team, by the Department of Human Services, in a format where your identifiable data (e.g. name, address) has been removed and the anonymous data will be held and analysed within a Department of Human Services approved, secure data storage environment. This information will be used solely for this project.

You will be asked to sign a consent form authorising the study to access your complete MBS and PBS data as outlined in the consent form. Medicare collects information on your doctor visits and the associated costs, while the PBS collects information on the prescription medications you have filled at pharmacies. The consent form is sent securely to the Department of Human Services who holds MBS and PBS data confidentially.

#### **Storage, retention and destruction**

The anonymity of your participation is assured with our procedure, in which a code number and not your name will identify you. Data will be kept securely at La Trobe University in a locked filing cabinet and password protected research computer. Re-identifiable (i.e. coded) information will also be kept to link your health service utilisation. Identifiable data will be stored for 15 years, after which time it will be securely destroyed (electronic records deleted, and paper-files shredded). All data and results will be handled in a strictly confidential manner, under guidelines set out by the National Health and Medical Research Council. The principal investigator (Professor Kay Crossley) is responsible for maintaining this confidentiality.

Information about you may be obtained from your health records held at health services for the purpose of this research. By signing the consent form you agree to the study team accessing health records if they are relevant to your participation in this research project.

In accordance with relevant Australian and/or Victorian privacy and other relevant laws, you have the right to request access to your information collected and stored by the research team. You also have the right to request that any information with which you disagree be corrected. Please contact the study member named below if you would like to access your information.

1  
2  
3  
4  
5  
6  
7  
8  
9  
10  
11  
12  
13  
14  
15  
16  
17  
18  
19  
20  
21  
22  
23  
24  
25  
26  
27  
28  
29  
30  
31  
32  
33  
34  
35  
36  
37  
38  
39  
40  
41  
42  
43  
44  
45  
46  
47  
48  
49  
50  
51  
52  
53  
54  
55  
56  
57  
58  
59  
60

It is anticipated that the results of this research project will be published and/or presented in a variety of forums and may be used by research higher degree students to obtain a research degree. In any publication, presentation or data files shared with other researchers, information will be provided in such a way that you cannot be identified, except with your permission. Any personal information that could identify you will be removed or changed before files are shared with other researchers.

## 12 What happens if I am injured as a result of participating in this research project?

If you suffer any injuries or complications as a result of this research project, you should contact the study team as soon as possible. You will be assisted with arranging appropriate medical treatment. If you are eligible for Medicare, you can receive medical treatment required to treat the injury or complication, free of charge, as a public patient in any Australian public hospital. Waiting lists may apply and you may not see the surgeon who performed your original ACL reconstruction. In the first instance your study physiotherapist and/or research team will evaluate your condition and then discuss treatment with both you and your regular health practitioner. In the event of loss or injury, any question about compensation must initially be directed to the research team who will advise the university insurer of the matter.

## 13 Who is organising and funding the research?

This research project is being conducted by Professor Kay Crossley and a team of national and international researchers. It has been funded by an Australian National Health and Medical Research Council Project Grant. No member of the research team will receive a personal financial benefit from your involvement in this research project (other than their ordinary wages).

## 14 Who has reviewed the research project?

All research in Australia involving humans is reviewed by an independent group of people called a Human Research Ethics Committee (HREC). The ethical aspects of this research project have been approved by the HREC of La Trobe University and the Alfred Hospital Ethics Committee.

This project will be carried out according to the *National Statement on Ethical Conduct in Human Research (2018)*. This statement has been developed to protect the interests of people who agree to participate in human research studies.

## 15 Further information and who to contact

The person you may need to contact will depend on the nature of your query. For all enquiries, you can contact the Clinical Trial Manager, during business hours:

Dr Adam Culvenor, Research Fellow in Physiotherapy, La Trobe University  
Tel: 03 9479 5116; E-mail: [a.culvenor@latrobe.edu.au](mailto:a.culvenor@latrobe.edu.au)

If you have any medical problems which may be related to your involvement in the project (for example, any side effects), the number to call Dr Adam Culvenor after hours is: 0401390974.

If you have any complaints about any aspect of the project, the way it is being conducted or any questions about being a research participant in general, then you may contact:

Reviewing HREC: La Trobe University Human Research Ethics Committee  
Complaints Contact: Senior Human Ethics Officer, Ethics and Integrity, Research Office  
Telephone: 03 9479 1443 E-mail: [humanethics@latrobe.edu.au](mailto:humanethics@latrobe.edu.au)

\* Please quote the application reference number HEC19447.

## Consent Form - *Adult providing own consent*

|                                                                        |                                                                                                                                                                  |
|------------------------------------------------------------------------|------------------------------------------------------------------------------------------------------------------------------------------------------------------|
| <b>Title</b>                                                           | Optimising outcomes after anterior cruciate ligament reconstruction: SUPER KNEE randomised controlled trial                                                      |
| <b>Short Title</b>                                                     | The SUPER KNEE trial                                                                                                                                             |
| <b>Ethics Reference Number</b>                                         | HEC19447                                                                                                                                                         |
| <b>Project Sponsor</b>                                                 | La Trobe University                                                                                                                                              |
| <b>Coordinating Principal Investigator/<br/>Principal Investigator</b> | Professor Kay Crossley                                                                                                                                           |
| <b>Associate Investigator(s)</b>                                       | Dr Adam Culvenor<br>Dr Christian Barton<br>Professor Ewa Roos<br>Professor Steven McPhail<br>Associate Professor Edwin Oei<br>Dr Andrea Bruder<br>Mr Thomas West |
| <b>Location</b>                                                        | La Trobe University                                                                                                                                              |

### **Consent Agreement**

I have read the Participant Information Sheet and I understand the purposes, procedures and risks of the research described in the project.

Information about you may be obtained from your health records held at health services for the purpose of this research. I give permission for my doctors, other health professionals, hospitals or laboratories outside this hospital to release information to La Trobe University concerning my knee injury and treatment for the purposes of this project. I understand that such information will remain confidential.

I understand that data files may be shared with other researchers, and that information will be provided in such a way that I cannot be identified, except with my permission.

I have had an opportunity to ask questions and I am satisfied with the answers I have received. I freely agree to participate in this research project as described and understand that I am free to withdraw at any time during the study without affecting my future health care.

At the end of the first 4 months, or after 12 months, you will be asked if you are willing to have a separate recorded interview with one of the study researchers for the purposes of seeking feedback.

- I agree to participate in a recorded interview  
 I do not agree to participate in a recorded interview

I understand that, if I decide to discontinue the study treatment, I may be asked to attend follow-up visits to allow collection of information regarding my health status. I agree that data gathered for the study may be published provided my name or other identifying information is not used.

- I wish to receive results of the study                       I do not wish to receive results of the study
- I consent to be contacted for future related research  
 I do not consent to be contacted for future related research

I understand that I will be given a signed copy of this document to keep.

Name of Participant (please print) \_\_\_\_\_

Signature \_\_\_\_\_ Date \_\_\_\_\_

1 **Declaration by Researcher†**

2  
3 I have given a verbal explanation of the research project, its procedures and risks and I believe  
4 that the participant has understood that explanation.

5  
6 Name of Researcher† (please print) \_\_\_\_\_

7  
8 Signature \_\_\_\_\_ Date \_\_\_\_\_

9  
10 † A member of the research team must provide the explanation of, and information concerning, the research project.

11  
12 Note: All parties signing the consent section must date their own signature.

13  
14  
15  
16  
17  
18  
19  
20  
21  
22  
23  
24  
25  
26  
27  
28  
29  
30  
31  
32  
33  
34  
35  
36  
37  
38  
39  
40  
41  
42  
43  
44  
45  
46  
47  
48  
49  
50  
51  
52  
53  
54  
55  
56  
57  
58  
59  
60  
*For peer review only*

## Form for Withdrawal of Participation - *Adult providing own consent*

**Title** Optimising outcomes after anterior cruciate ligament reconstruction: SUPER KNEE randomised controlled trial

**Short Title** The SUPER KNEE trial

**Ethics Reference Number** HEC19447

**Project Sponsor** La Trobe University

**Coordinating Principal Investigator/  
Principal Investigator** Professor Kay Crossley

**Associate Investigator(s)** Dr Adam Culvenor  
Dr Christian Barton  
Professor Ewa Roos  
Professor Steven McPhail  
Associate Professor Edwin Oei  
Dr Andrea Bruder  
Mr Thomas West

**Location** La Trobe University

### Declaration by Participant

I wish to withdraw from participation in the above research project and understand that such withdrawal will not affect my routine treatment, my access to Health Services or Government benefits, my relationship with those treating me or my relationship with La Trobe University or the health system where I had my knee surgery. I understand that no further information about me will be collected for the study from the withdrawal date. I understand that information about me that has already been analysed and/or included in a publication by the study, may not be able to be destroyed. I request that the study handles the information they have collected about me in the following way (choose one option):

- DESTROY all my information collected so it can no longer be used for research
- RETAIN all my information collected so it can be used for research

Name of Participant (please print) \_\_\_\_\_

Signature \_\_\_\_\_ Date \_\_\_\_\_

*In the event that the participant's decision to withdraw is communicated verbally, the Researcher will need to provide a description of the circumstances below.*

Date:  
Time:

1  
2  
3  
4  
5  
6  
7  
8  
9  
10  
11  
12  
13  
14  
15  
16  
17  
18  
19  
20  
21  
22  
23  
24  
25  
26  
27  
28  
29  
30  
31  
32  
33  
34  
35  
36  
37  
38  
39  
40  
41  
42  
43  
44  
45  
46  
47  
48  
49  
50  
51  
52  
53  
54  
55  
56  
57  
58  
59  
60**Declaration by Researcher†**

I have given a verbal explanation of the implications of withdrawal from the research project and I believe that the participant has understood that explanation.

Name of Researcher† (please print) \_\_\_\_\_

Signature \_\_\_\_\_ Date \_\_\_\_\_

† A member of the research team must provide the explanation of and information concerning withdrawal from the research project.

Note: All parties signing the consent section must date their own signature.

For peer review only

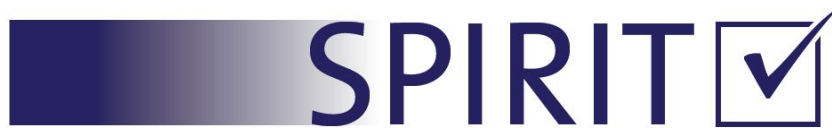

STANDARD PROTOCOL ITEMS: RECOMMENDATIONS FOR INTERVENTIONAL TRIALS

SPIRIT 2013 Checklist: Recommended items to address in a clinical trial protocol and related documents\*

| Section/item                                              | Item No | Description                                                                                                                                                                                                                                                                              |                     |
|-----------------------------------------------------------|---------|------------------------------------------------------------------------------------------------------------------------------------------------------------------------------------------------------------------------------------------------------------------------------------------|---------------------|
| <b>Administrative information</b>                         |         |                                                                                                                                                                                                                                                                                          |                     |
| Title                                                     | 1       | Descriptive title identifying the study design, population, interventions, and, if applicable, trial acronym                                                                                                                                                                             | 1                   |
| Trial registration                                        | 2a      | Trial identifier and registry name. If not yet registered, name of intended registry                                                                                                                                                                                                     | 3                   |
|                                                           | 2b      | All items from the World Health Organization Trial Registration Data Set                                                                                                                                                                                                                 | ACTRN12620001164987 |
| Protocol version                                          | 3       | Date and version identifier                                                                                                                                                                                                                                                              | NA                  |
| Funding                                                   | 4       | Sources and types of financial, material, and other support                                                                                                                                                                                                                              | 23                  |
| Roles and responsibilities                                | 5a      | Names, affiliations, and roles of protocol contributors                                                                                                                                                                                                                                  | 23                  |
|                                                           | 5b      | Name and contact information for the trial sponsor                                                                                                                                                                                                                                       | 1                   |
|                                                           | 5c      | Role of study sponsor and funders, if any, in study design; collection, management, analysis, and interpretation of data; writing of the report; and the decision to submit the report for publication, including whether they will have ultimate authority over any of these activities | 23                  |
|                                                           | 5d      | Composition, roles, and responsibilities of the coordinating centre, steering committee, endpoint adjudication committee, data management team, and other individuals or groups overseeing the trial, if applicable (see Item 21a for data monitoring committee)                         | NA                  |
| <b>Introduction</b>                                       |         |                                                                                                                                                                                                                                                                                          |                     |
| Background and rationale                                  | 6a      | Description of research question and justification for undertaking the trial, including summary of relevant studies (published and unpublished) examining benefits and harms for each intervention                                                                                       | 4                   |
|                                                           | 6b      | Explanation for choice of comparators                                                                                                                                                                                                                                                    | 4-5                 |
| Objectives                                                | 7       | Specific objectives or hypotheses                                                                                                                                                                                                                                                        | 5                   |
| Trial design                                              | 8       | Description of trial design including type of trial (eg, parallel group, crossover, factorial, single group), allocation ratio, and framework (eg, superiority, equivalence, noninferiority, exploratory)                                                                                | 5-6                 |
| <b>Methods: Participants, interventions, and outcomes</b> |         |                                                                                                                                                                                                                                                                                          |                     |



|    |                      |     |                                                                                                                                                                                                                                                                                                                                                                                |                                |
|----|----------------------|-----|--------------------------------------------------------------------------------------------------------------------------------------------------------------------------------------------------------------------------------------------------------------------------------------------------------------------------------------------------------------------------------|--------------------------------|
| 1  |                      |     |                                                                                                                                                                                                                                                                                                                                                                                |                                |
| 2  |                      |     |                                                                                                                                                                                                                                                                                                                                                                                |                                |
| 3  |                      |     |                                                                                                                                                                                                                                                                                                                                                                                |                                |
| 4  | Study setting        | 9   | Description of study settings (eg, community clinic, academic hospital) and list of countries where data will be collected. Reference to where list of study sites can be obtained                                                                                                                                                                                             | 6                              |
| 5  |                      |     |                                                                                                                                                                                                                                                                                                                                                                                |                                |
| 6  |                      |     |                                                                                                                                                                                                                                                                                                                                                                                |                                |
| 7  | Eligibility criteria | 10  | Inclusion and exclusion criteria for participants. If applicable, eligibility criteria for study centres and individuals who will perform the interventions (eg, surgeons, psychotherapists)                                                                                                                                                                                   | 6                              |
| 8  |                      |     |                                                                                                                                                                                                                                                                                                                                                                                |                                |
| 9  |                      |     |                                                                                                                                                                                                                                                                                                                                                                                |                                |
| 10 |                      |     |                                                                                                                                                                                                                                                                                                                                                                                |                                |
| 11 | Interventions        | 11a | Interventions for each group with sufficient detail to allow replication, including how and when they will be administered                                                                                                                                                                                                                                                     | 8-13, Table 2, Supplementary 1 |
| 12 |                      |     |                                                                                                                                                                                                                                                                                                                                                                                |                                |
| 13 |                      | 11b | Criteria for discontinuing or modifying allocated interventions for a given trial participant (eg, drug dose change in response to harms, participant request, or improving/worsening disease)                                                                                                                                                                                 | Table 2                        |
| 14 |                      |     |                                                                                                                                                                                                                                                                                                                                                                                |                                |
| 15 |                      |     |                                                                                                                                                                                                                                                                                                                                                                                |                                |
| 16 |                      |     |                                                                                                                                                                                                                                                                                                                                                                                |                                |
| 17 |                      | 11c | Strategies to improve adherence to intervention protocols, and any procedures for monitoring adherence (eg, drug tablet return, laboratory tests)                                                                                                                                                                                                                              | 8-13, Table 2                  |
| 18 |                      |     |                                                                                                                                                                                                                                                                                                                                                                                |                                |
| 19 |                      |     |                                                                                                                                                                                                                                                                                                                                                                                |                                |
| 20 |                      |     |                                                                                                                                                                                                                                                                                                                                                                                |                                |
| 21 |                      | 11d | Relevant concomitant care and interventions that are permitted or prohibited during the trial                                                                                                                                                                                                                                                                                  | 13                             |
| 22 |                      |     |                                                                                                                                                                                                                                                                                                                                                                                |                                |
| 23 | Outcomes             | 12  | Primary, secondary, and other outcomes, including the specific measurement variable (eg, systolic blood pressure), analysis metric (eg, change from baseline, final value, time to event), method of aggregation (eg, median, proportion), and time point for each outcome. Explanation of the clinical relevance of chosen efficacy and harm outcomes is strongly recommended | 14-18, Table 3                 |
| 24 |                      |     |                                                                                                                                                                                                                                                                                                                                                                                |                                |
| 25 |                      |     |                                                                                                                                                                                                                                                                                                                                                                                |                                |
| 26 |                      |     |                                                                                                                                                                                                                                                                                                                                                                                |                                |
| 27 |                      |     |                                                                                                                                                                                                                                                                                                                                                                                |                                |
| 28 |                      |     |                                                                                                                                                                                                                                                                                                                                                                                |                                |
| 29 | Participant timeline | 13  | Time schedule of enrolment, interventions (including any run-ins and washouts), assessments, and visits for participants. A schematic diagram is highly recommended (see Figure)                                                                                                                                                                                               | Figure 1                       |
| 30 |                      |     |                                                                                                                                                                                                                                                                                                                                                                                |                                |
| 31 |                      |     |                                                                                                                                                                                                                                                                                                                                                                                |                                |
| 32 |                      |     |                                                                                                                                                                                                                                                                                                                                                                                |                                |
| 33 | Sample size          | 14  | Estimated number of participants needed to achieve study objectives and how it was determined, including clinical and statistical assumptions supporting any sample size calculations                                                                                                                                                                                          | 19                             |
| 34 |                      |     |                                                                                                                                                                                                                                                                                                                                                                                |                                |
| 35 |                      |     |                                                                                                                                                                                                                                                                                                                                                                                |                                |
| 36 |                      |     |                                                                                                                                                                                                                                                                                                                                                                                |                                |
| 37 | Recruitment          | 15  | Strategies for achieving adequate participant enrolment to reach target sample size                                                                                                                                                                                                                                                                                            | 6-7                            |
| 38 |                      |     |                                                                                                                                                                                                                                                                                                                                                                                |                                |

### Methods: Assignment of interventions (for controlled trials)

#### Allocation:

|    |                                  |     |                                                                                                                                                                                                                                                                                                                                                          |     |
|----|----------------------------------|-----|----------------------------------------------------------------------------------------------------------------------------------------------------------------------------------------------------------------------------------------------------------------------------------------------------------------------------------------------------------|-----|
| 41 |                                  |     |                                                                                                                                                                                                                                                                                                                                                          |     |
| 42 |                                  |     |                                                                                                                                                                                                                                                                                                                                                          |     |
| 43 | Sequence generation              | 16a | Method of generating the allocation sequence (eg, computer-generated random numbers), and list of any factors for stratification. To reduce predictability of a random sequence, details of any planned restriction (eg, blocking) should be provided in a separate document that is unavailable to those who enrol participants or assign interventions | 7-8 |
| 44 |                                  |     |                                                                                                                                                                                                                                                                                                                                                          |     |
| 45 |                                  |     |                                                                                                                                                                                                                                                                                                                                                          |     |
| 46 |                                  |     |                                                                                                                                                                                                                                                                                                                                                          |     |
| 47 |                                  |     |                                                                                                                                                                                                                                                                                                                                                          |     |
| 48 |                                  |     |                                                                                                                                                                                                                                                                                                                                                          |     |
| 49 | Allocation concealment mechanism | 16b | Mechanism of implementing the allocation sequence (eg, central telephone; sequentially numbered, opaque, sealed envelopes), describing any steps to conceal the sequence until interventions are assigned                                                                                                                                                | 7-8 |
| 50 |                                  |     |                                                                                                                                                                                                                                                                                                                                                          |     |
| 51 |                                  |     |                                                                                                                                                                                                                                                                                                                                                          |     |
| 52 |                                  |     |                                                                                                                                                                                                                                                                                                                                                          |     |
| 53 |                                  |     |                                                                                                                                                                                                                                                                                                                                                          |     |
| 54 | Implementation                   | 16c | Who will generate the allocation sequence, who will enrol participants, and who will assign participants to interventions                                                                                                                                                                                                                                | 7-8 |
| 55 |                                  |     |                                                                                                                                                                                                                                                                                                                                                          |     |
| 56 | Blinding (masking)               | 17a | Who will be blinded after assignment to interventions (eg, trial participants, care providers, outcome assessors, data analysts), and how                                                                                                                                                                                                                | 7-8 |
| 57 |                                  |     |                                                                                                                                                                                                                                                                                                                                                          |     |
| 58 |                                  |     |                                                                                                                                                                                                                                                                                                                                                          |     |
| 59 |                                  |     |                                                                                                                                                                                                                                                                                                                                                          |     |
| 60 |                                  |     |                                                                                                                                                                                                                                                                                                                                                          |     |

1  
2  
3  
4  
5  
6  
7  
8  
9  
10  
11  
12  
13  
14  
15  
16  
17  
18  
19  
20  
21  
22  
23  
24  
25  
26  
27  
28  
29  
30  
31  
32  
33  
34  
35  
36  
37  
38  
39  
40  
41  
42  
43  
44  
45  
46  
47  
48  
49  
50  
51  
52  
53  
54  
55  
56  
57  
58  
59  
60

|  |     |                                                                                                                                                      |    |
|--|-----|------------------------------------------------------------------------------------------------------------------------------------------------------|----|
|  | 17b | If blinded, circumstances under which unblinding is permissible, and procedure for revealing a participant's allocated intervention during the trial | NA |
|--|-----|------------------------------------------------------------------------------------------------------------------------------------------------------|----|

### Methods: Data collection, management, and analysis

|                         |     |                                                                                                                                                                                                                                                                                                                                                                                                              |    |
|-------------------------|-----|--------------------------------------------------------------------------------------------------------------------------------------------------------------------------------------------------------------------------------------------------------------------------------------------------------------------------------------------------------------------------------------------------------------|----|
| Data collection methods | 18a | Plans for assessment and collection of outcome, baseline, and other trial data, including any related processes to promote data quality (eg, duplicate measurements, training of assessors) and a description of study instruments (eg, questionnaires, laboratory tests) along with their reliability and validity, if known. Reference to where data collection forms can be found, if not in the protocol | 13 |
|                         | 18b | Plans to promote participant retention and complete follow-up, including list of any outcome data to be collected for participants who discontinue or deviate from intervention protocols                                                                                                                                                                                                                    | 13 |
| Data management         | 19  | Plans for data entry, coding, security, and storage, including any related processes to promote data quality (eg, double data entry; range checks for data values). Reference to where details of data management procedures can be found, if not in the protocol                                                                                                                                            | 19 |
| Statistical methods     | 20a | Statistical methods for analysing primary and secondary outcomes. Reference to where other details of the statistical analysis plan can be found, if not in the protocol                                                                                                                                                                                                                                     | 20 |
|                         | 20b | Methods for any additional analyses (eg, subgroup and adjusted analyses)                                                                                                                                                                                                                                                                                                                                     | 20 |
|                         | 20c | Definition of analysis population relating to protocol non-adherence (eg, as randomised analysis), and any statistical methods to handle missing data (eg, multiple imputation)                                                                                                                                                                                                                              | 20 |

### Methods: Monitoring

|                 |     |                                                                                                                                                                                                                                                                                                                                       |       |
|-----------------|-----|---------------------------------------------------------------------------------------------------------------------------------------------------------------------------------------------------------------------------------------------------------------------------------------------------------------------------------------|-------|
| Data monitoring | 21a | Composition of data monitoring committee (DMC); summary of its role and reporting structure; statement of whether it is independent from the sponsor and competing interests; and reference to where further details about its charter can be found, if not in the protocol. Alternatively, an explanation of why a DMC is not needed | 19    |
|                 | 21b | Description of any interim analyses and stopping guidelines, including who will have access to these interim results and make the final decision to terminate the trial                                                                                                                                                               | 19-20 |
| Harms           | 22  | Plans for collecting, assessing, reporting, and managing solicited and spontaneously reported adverse events and other unintended effects of trial interventions or trial conduct                                                                                                                                                     | 18-19 |
| Auditing        | 23  | Frequency and procedures for auditing trial conduct, if any, and whether the process will be independent from investigators and the sponsor                                                                                                                                                                                           | NA    |

### Ethics and dissemination

|                          |    |                                                                                           |    |
|--------------------------|----|-------------------------------------------------------------------------------------------|----|
| Research ethics approval | 24 | Plans for seeking research ethics committee/institutional review board (REC/IRB) approval | 22 |
|--------------------------|----|-------------------------------------------------------------------------------------------|----|

|    |                               |     |                                                                                                                                                                                                                                                                                     |                 |
|----|-------------------------------|-----|-------------------------------------------------------------------------------------------------------------------------------------------------------------------------------------------------------------------------------------------------------------------------------------|-----------------|
| 1  |                               |     |                                                                                                                                                                                                                                                                                     |                 |
| 2  |                               |     |                                                                                                                                                                                                                                                                                     |                 |
| 3  |                               |     |                                                                                                                                                                                                                                                                                     |                 |
| 4  | Protocol amendments           | 25  | Plans for communicating important protocol modifications (eg, changes to eligibility criteria, outcomes, analyses) to relevant parties (eg, investigators, REC/IRBs, trial participants, trial registries, journals, regulators)                                                    | 22              |
| 5  |                               |     |                                                                                                                                                                                                                                                                                     |                 |
| 6  |                               |     |                                                                                                                                                                                                                                                                                     |                 |
| 7  |                               |     |                                                                                                                                                                                                                                                                                     |                 |
| 8  | Consent or assent             | 26a | Who will obtain informed consent or assent from potential trial participants or authorised surrogates, and how (see Item 32)                                                                                                                                                        | 22              |
| 9  |                               |     |                                                                                                                                                                                                                                                                                     |                 |
| 10 |                               |     |                                                                                                                                                                                                                                                                                     |                 |
| 11 |                               | 26b | Additional consent provisions for collection and use of participant data and biological specimens in ancillary studies, if applicable                                                                                                                                               | NA              |
| 12 |                               |     |                                                                                                                                                                                                                                                                                     |                 |
| 13 |                               |     |                                                                                                                                                                                                                                                                                     |                 |
| 14 | Confidentiality               | 27  | How personal information about potential and enrolled participants will be collected, shared, and maintained in order to protect confidentiality before, during, and after the trial                                                                                                | 19              |
| 15 |                               |     |                                                                                                                                                                                                                                                                                     |                 |
| 16 |                               |     |                                                                                                                                                                                                                                                                                     |                 |
| 17 |                               |     |                                                                                                                                                                                                                                                                                     |                 |
| 18 | Declaration of interests      | 28  | Financial and other competing interests for principal investigators for the overall trial and each study site                                                                                                                                                                       | 23-24           |
| 19 |                               |     |                                                                                                                                                                                                                                                                                     |                 |
| 20 | Access to data                | 29  | Statement of who will have access to the final trial dataset, and disclosure of contractual agreements that limit such access for investigators                                                                                                                                     | Supplementary 6 |
| 21 |                               |     |                                                                                                                                                                                                                                                                                     |                 |
| 22 |                               |     |                                                                                                                                                                                                                                                                                     |                 |
| 23 |                               |     |                                                                                                                                                                                                                                                                                     |                 |
| 24 | Ancillary and post-trial care | 30  | Provisions, if any, for ancillary and post-trial care, and for compensation to those who suffer harm from trial participation                                                                                                                                                       | NA              |
| 25 |                               |     |                                                                                                                                                                                                                                                                                     |                 |
| 26 | Dissemination policy          | 31a | Plans for investigators and sponsor to communicate trial results to participants, healthcare professionals, the public, and other relevant groups (eg, via publication, reporting in results databases, or other data sharing arrangements), including any publication restrictions | 22              |
| 27 |                               |     |                                                                                                                                                                                                                                                                                     |                 |
| 28 |                               | 31b | Authorship eligibility guidelines and any intended use of professional writers                                                                                                                                                                                                      | NA              |
| 29 |                               |     |                                                                                                                                                                                                                                                                                     |                 |
| 30 |                               | 31c | Plans, if any, for granting public access to the full protocol, participant-level dataset, and statistical code                                                                                                                                                                     | NA              |
| 31 |                               |     |                                                                                                                                                                                                                                                                                     |                 |
| 32 |                               |     |                                                                                                                                                                                                                                                                                     |                 |
| 33 |                               |     |                                                                                                                                                                                                                                                                                     |                 |
| 34 |                               |     |                                                                                                                                                                                                                                                                                     |                 |
| 35 |                               |     |                                                                                                                                                                                                                                                                                     |                 |
| 36 |                               |     |                                                                                                                                                                                                                                                                                     |                 |
| 37 |                               |     |                                                                                                                                                                                                                                                                                     |                 |
| 38 | <b>Appendices</b>             |     |                                                                                                                                                                                                                                                                                     |                 |
| 39 | Informed consent materials    | 32  | Model consent form and other related documentation given to participants and authorised surrogates                                                                                                                                                                                  | Supplementary 6 |
| 40 |                               |     |                                                                                                                                                                                                                                                                                     |                 |
| 41 |                               |     |                                                                                                                                                                                                                                                                                     |                 |
| 42 |                               |     |                                                                                                                                                                                                                                                                                     |                 |
| 43 | Biological specimens          | 33  | Plans for collection, laboratory evaluation, and storage of biological specimens for genetic or molecular analysis in the current trial and for future use in ancillary studies, if applicable                                                                                      | NA              |
| 44 |                               |     |                                                                                                                                                                                                                                                                                     |                 |
| 45 |                               |     |                                                                                                                                                                                                                                                                                     |                 |

\*It is strongly recommended that this checklist be read in conjunction with the SPIRIT 2013 Explanation & Elaboration for important clarification on the items. Amendments to the protocol should be tracked and dated. The SPIRIT checklist is copyrighted by the SPIRIT Group under the Creative Commons "[Attribution-Non Commercial-No Derivs 3.0 Unported](https://creativecommons.org/licenses/by-nc-nd/3.0/)" license.
