# Supplementary material for: SUpervised exercise-therapy and Patient Education Rehabilitation (SUPER) versus minimal intervention for young adults at risk of knee osteoarthritis after ACL reconstruction: SUPER-Knee randomised controlled trial protocol
Source: HighWire-hosted journal article supplement (doi:10.1136/bmjopen-2022-068279), 2023-01-01
Supplement: bmjopen-2022-068279supp005_data_supplement.pdf [file bmjopen-2022-068279supp005_data_supplement.pdf]

Culvenor et al., SUPER-Knee trial protocol

**Supplementary File 5.** Details of magnetic resonance imaging sequences acquired

|                        | <b>Proton Density weighted fat suppressed fast spin-echo<br/><i>Axial</i></b> | <b>Proton Density weighted fat suppressed fast spin-echo<br/><i>Sagittal</i></b> | <b>Proton Density weighted fat suppressed fast spin-echo<br/><i>Coronal</i></b> | <b>Multi-echo spin-echo (MESE) T2 relaxation time mapping<br/><i>Sagittal</i></b> | <b>Fast spoiled gradient echo (FSPGR)<br/><i>Sagittal</i></b> |
|------------------------|-------------------------------------------------------------------------------|----------------------------------------------------------------------------------|---------------------------------------------------------------------------------|-----------------------------------------------------------------------------------|---------------------------------------------------------------|
| Repetition time (msec) | 3725                                                                          | 2300                                                                             | 2325                                                                            | 3225                                                                              | 10.3                                                          |
| Echo time (msec)       | 36                                                                            | 36                                                                               | 36                                                                              | 10, 20, 30, 40, 50, 60, 70, 80                                                    | Minimum (~3.7)                                                |
| Acquisition matrix     | 340 x 300                                                                     | 360 x 300                                                                        | 340 x 300                                                                       | 320 x 269                                                                         | 512 x 512                                                     |
| Field of view (cm)     | 16                                                                            | 16                                                                               | 16                                                                              | 12                                                                                | 16                                                            |
| Resolution (mm)        | 0.471 x 0.533 x 3.0                                                           | 0.444 x 0.5333 x 3.0                                                             | 0.471 x 0.5333 x 3.0                                                            | 0.375 x 0.446 x 3.0                                                               | 0.313 x 0.313 x 1.5                                           |
| Slice thickness (mm)   | 3.0                                                                           | 3.0                                                                              | 3.0                                                                             | 3.0                                                                               | 1.5                                                           |
| Slice gap (mm)         | 0.3                                                                           | 1.0                                                                              | 0.3                                                                             | 1.0                                                                               | 0                                                             |
| Flip angle (°)         | 142                                                                           | 142                                                                              | 142                                                                             | 90                                                                                | 12                                                            |
| Number of echoes       | 10                                                                            | 10                                                                               | 9                                                                               | 8                                                                                 | -                                                             |
| Number of slices       | 32                                                                            | 31                                                                               | 34                                                                              | 31                                                                                | 84                                                            |
| Number of excitations  | 1                                                                             | 1                                                                                | 1                                                                               | 0.5                                                                               | 1                                                             |
| Bandwidth              | 50                                                                            | 35.71                                                                            | 35.71                                                                           | 31.25                                                                             | 31.25                                                         |
| Scan time (mins)       | 2:59                                                                          | 2:55                                                                             | 4:21                                                                            | 7:51                                                                              | 15:08                                                         |
